# Supplementary material for: Integrating physicochemical and microbial characterization of red rice broth fermented over an 18-hour period augmented with metagenomic and metabolomic approaches
Source: Royal Society of Chemistry journal article supplement (doi:10.1039/d6ra00382f), 2026-04-22

# Fastq File Quality Check Report

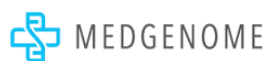

**MedGenome Labs Ltd.**

December 2, 2024

## Contents

|                            |          |
|----------------------------|----------|
| <b>Raw reads summary</b>   | <b>2</b> |
| <b>1 FRW_2024_01</b>       | <b>3</b> |
| 1.1 Read orientation–R1    | 3        |
| 1.1.1 Quality distribution | 3        |
| 1.1.2 Base distribution    | 3        |
| 1.1.3 GC distribution      | 3        |
| 1.2 Read orientation–R2    | 4        |
| 1.2.1 Quality distribution | 4        |
| 1.2.2 Base distribution    | 4        |
| 1.2.3 GC distribution      | 4        |

# Raw reads summary

Table 1: Raw reads summary

| Sl.No | Sample      | Run | Read orientation | Mean read quality (Phred score) | Number of reads | % GC  | % Q < 10 | % Q 10-20 | % Q 20-30 | % Q > 30 | Number of bases (MB) | Mean read length (bp) |
|-------|-------------|-----|------------------|---------------------------------|-----------------|-------|----------|-----------|-----------|----------|----------------------|-----------------------|
| 1     | FRW_2024_01 |     | R1               | 38.86                           | 12332578        | 48.81 | 0.01     | 2.2       | 3.28      | 94.51    | 1862.22              | 151.0                 |
|       |             |     | R2               | 38.46                           | 12332578        | 48.42 | 0.02     | 3.15      | 4.09      | 92.75    | 1862.22              | 151.0                 |

# 1 FRW\_2024\_01

## 1.1 Read orientation-R1

### 1.1.1 Quality distribution

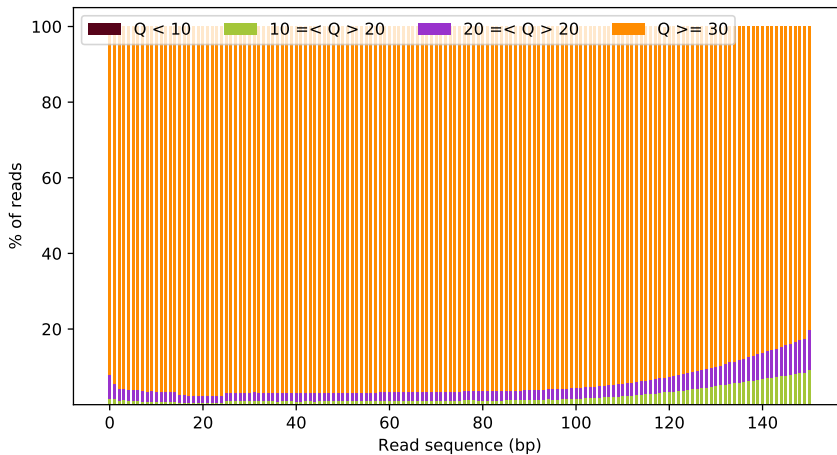

### 1.1.2 Base distribution

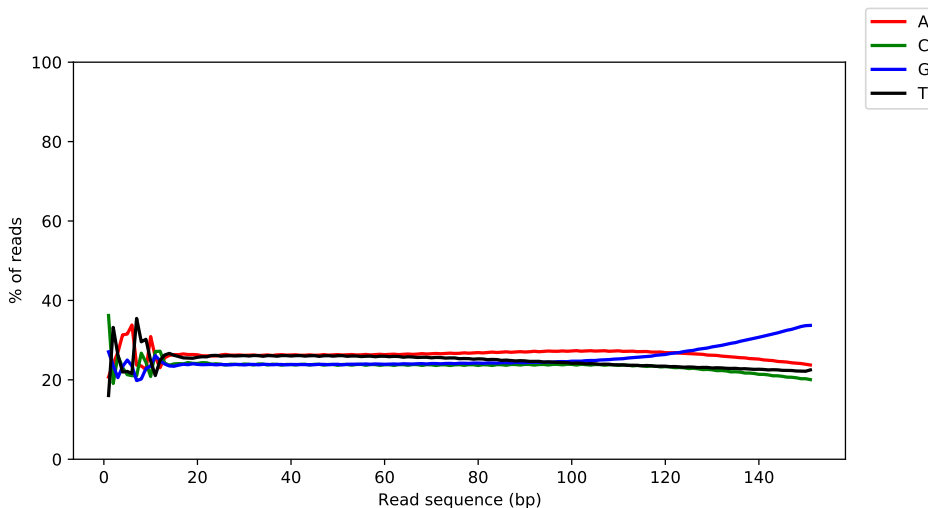

### 1.1.3 GC distribution

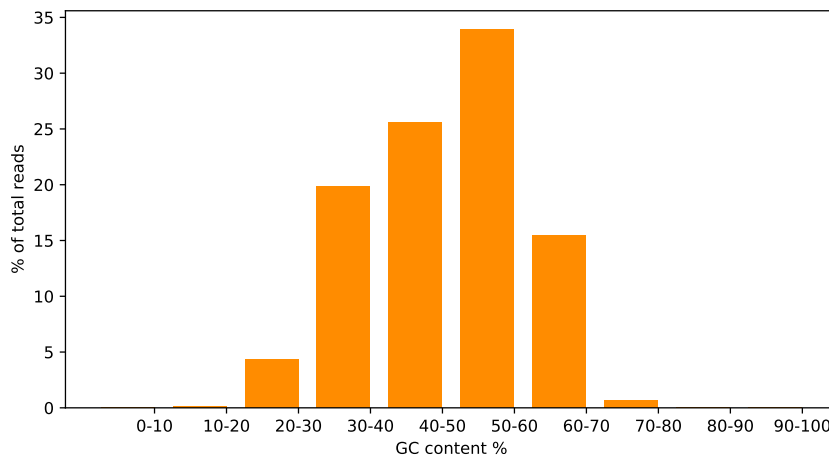

## 1.2 Read orientation-R2

### 1.2.1 Quality distribution

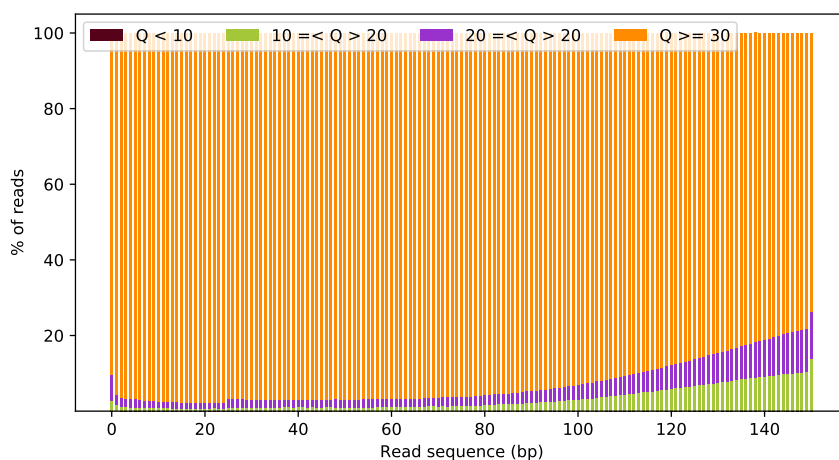

### 1.2.2 Base distribution

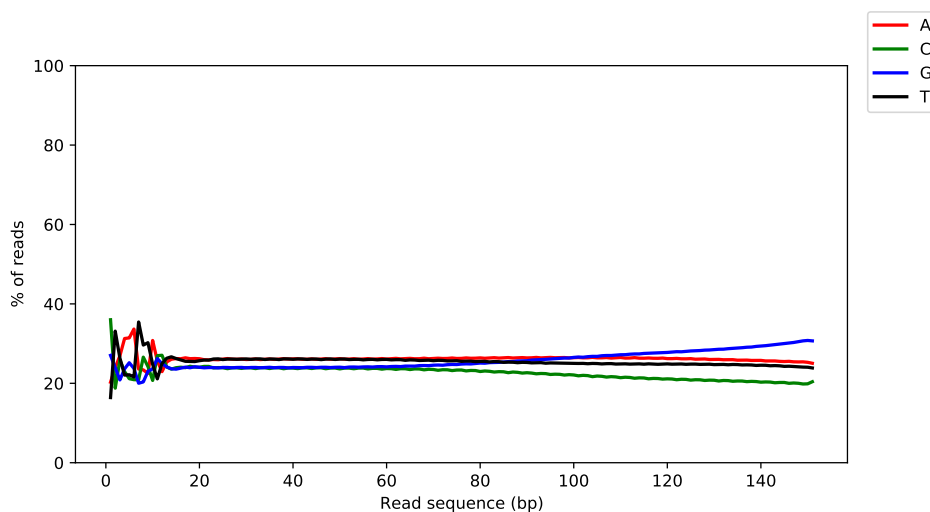

### 1.2.3 GC distribution

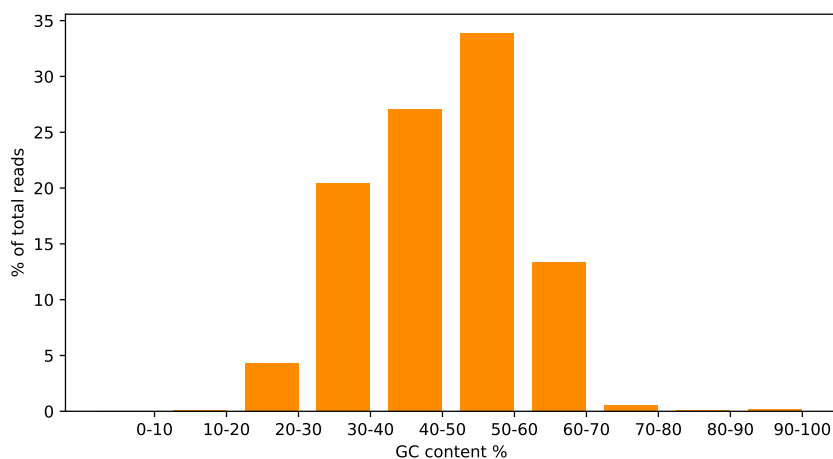

Supplement: d6ra00382f4.pdf [file d6ra00382f4.pdf]
