# Supplementary material for: Integrating physicochemical and microbial characterization of red rice broth fermented over an 18-hour period augmented with metagenomic and metabolomic approaches
Source: Royal Society of Chemistry journal article supplement (doi:10.1039/d6ra00382f), 2026-04-22
Supplement: d6ra00382f1.pdf [file d6ra00382f1.pdf]

## Supplementary Material 2A

### Metagenomic Workflow

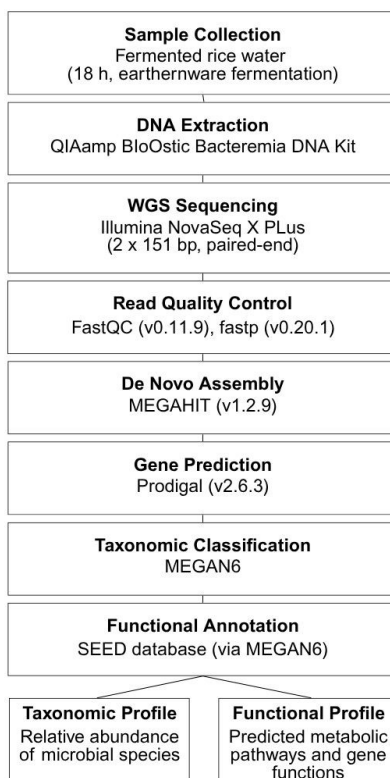

### Supplementary Figure S1. Metagenomics Workflow for Fermented Red Rice Water Analysis.

Metagenomics: DNA extraction, Illumina sequencing, taxonomic and functional annotation of microbial diversity and metabolic potential.

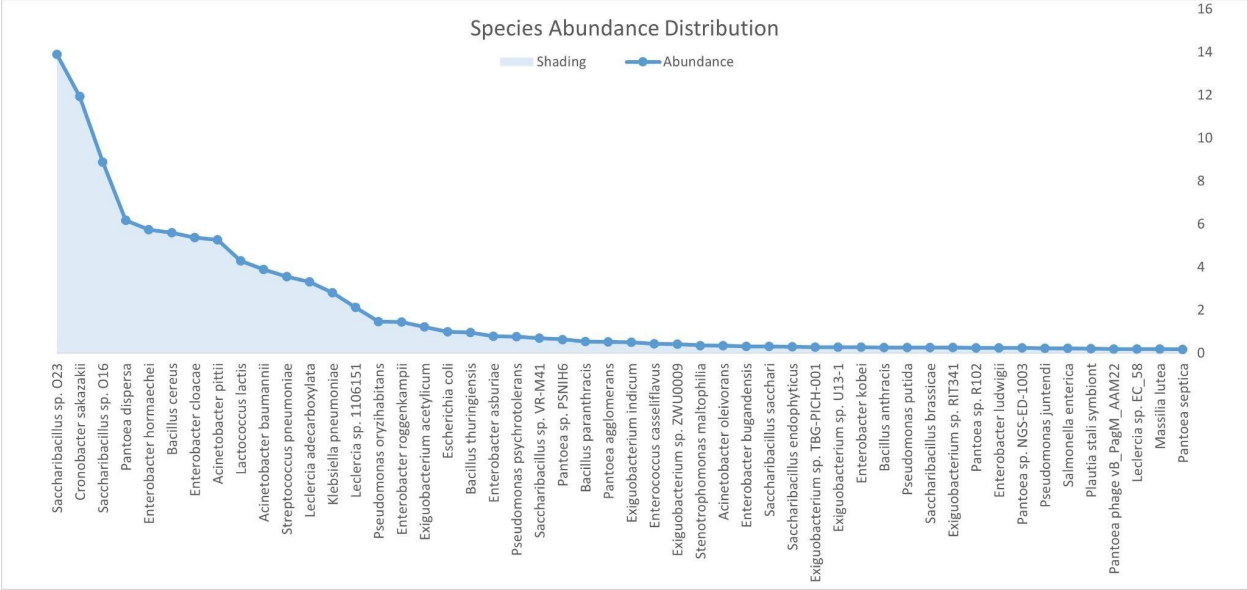

**Supplementary Figure S2. Rank-abundance curve of microbial species in fermented Matta rice water.**

X-axis: species ordered by abundance. Y-axis: relative abundance (log scale). The curve demonstrates species richness and evenness across 50 identified taxa.
