# Supplementary material for: Integrating physicochemical and microbial characterization of red rice broth fermented over an 18-hour period augmented with metagenomic and metabolomic approaches
Source: Royal Society of Chemistry journal article supplement (doi:10.1039/d6ra00382f), 2026-04-22
Supplement: d6ra00382f2.pdf [file d6ra00382f2.pdf]

**MedGenome Labs Ltd.**

3rd Floor, Narayana Nethralaya Building, Narayana Health City,  
#258/A, Bommasandra, Hosur Road, Bangalore - 560 099, India  
Tel : +91 (0)80 67154989 / 990, Web: [www.medgenome.com](http://www.medgenome.com)

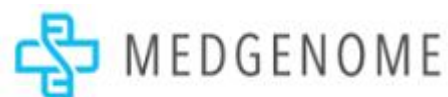

## Whole Genome Metagenome Analysis

**0753855**

**Submitted to**

**Mr. B Srikanth**

**MCC18355-Sree Biologix**

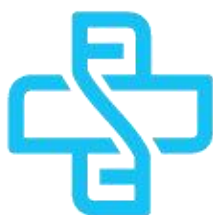

**Report by**

**Medgenome Labs Pvt Ltd**

**Bangalore-560099**

**23-12-2024**

**MedGenome Labs Ltd.**

3rd Floor, Narayana Nethralaya Building, Narayana Health City,  
#258/A, Bommasandra, Hosur Road, Bangalore - 560 099, India  
Tel : +91 (0)80 67154989 / 990, Web: [www.medgenome.com](http://www.medgenome.com)

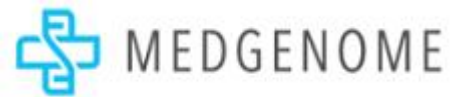

## Contents

|                                 |   |
|---------------------------------|---|
| Overview                        | 3 |
| Data Summary                    | 4 |
| Bioinformatics Analysis Results | 5 |
| De novo Metagenome assembly     | 6 |
| ORF Prediction                  | 6 |
| Microbial Diversity             | 6 |
| Supplementary Files:            | 7 |
| References:                     | 7 |

## Overview

The given samples were sequenced using NovaSeqXplus with a read length of 151 bp. The samples were taken for whole genome metagenome analysis. The *de novo* assembly was carried out using the reads to obtain the scaffolds. These scaffolds were then used for gene prediction. The abundances at the phylum, genus and species level are given. The abundances in terms of SEED annotations are also given.

**Table 1 : Samples Details**

| Sample name | Sample ID   |
|-------------|-------------|
| 8801433     | FRW_2024_01 |

**Figure 1: Bioinformatics workflow**

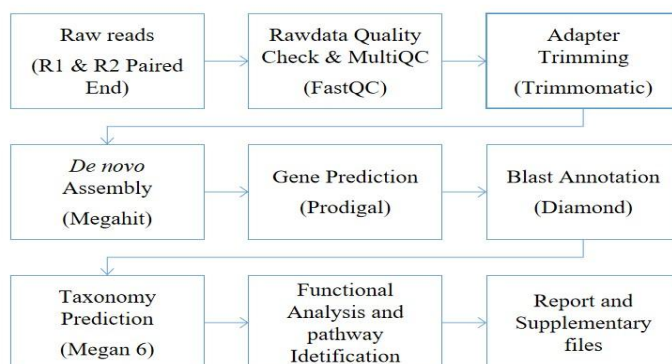

## Methodology

### Read quality check

Initially, we checked the following parameters from the samples fastq file - Base quality score distribution, sequence quality score distribution, average base content per read, GC distribution in the reads, PCR amplification issue, overrepresented sequences and adapters.

Based on the quality report, the fastq files were trimmed to retain high-quality sequences and the low-quality sequence reads were excluded from the analysis. The adapter trimming was performed using the fastq-mcf tool (version- 1.04.803).

### Denovo Metagenome assembly

Again, the Adapter trimmed reads were *de novo* assembled using Megahit (version. 1.2.9).

### ORF prediction and annotation

The Primarily assembled genome was used for ORF prediction and ORF annotation using Prodigal (v. 2.6.3).

### Taxonomy classification and functional annotation

For predicted ORF the taxonomic classification and identification of SEED pathway was performed using Megan 6.

### Data Summary

The given sample was taken for whole genome metagenome analysis and 3.7 GB data was generated for the samples. Q30% was above 92 % and GC% is 48 %. Kindly refer to the QC report for further details. The quality check for the samples after adapter trimming has been performed and the adapter trimmed sequences are taken for downstream analysis.

**Table 1: Data summary**

| Sample_name | Data before AT (GB) | Data after AT (Gb) | Read Quality before AT | Read Quality after AT | GC% before AT | GC% after AT |
|-------------|---------------------|--------------------|------------------------|-----------------------|---------------|--------------|
| FRW_2024_01 | 3.72                | 2.58               | 38.66                  | 39.26                 | 48.61         | 47.67        |

\*AT - Adapter trimming

### Bioinformatics Analysis Results

**Figure 2: Data before and after adapter trimming**

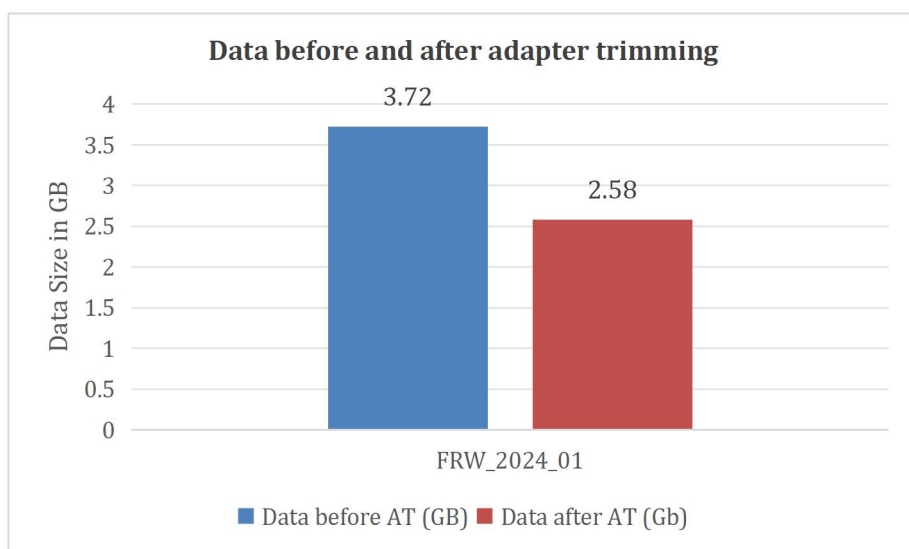

**Figure 3: Average Read quality before and after trimming**

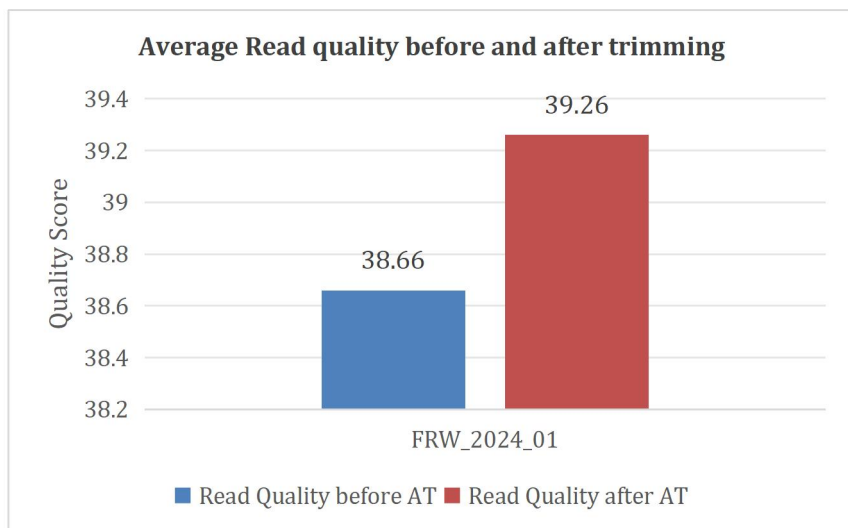

**Figure 4: Average GC % before and after trimming**

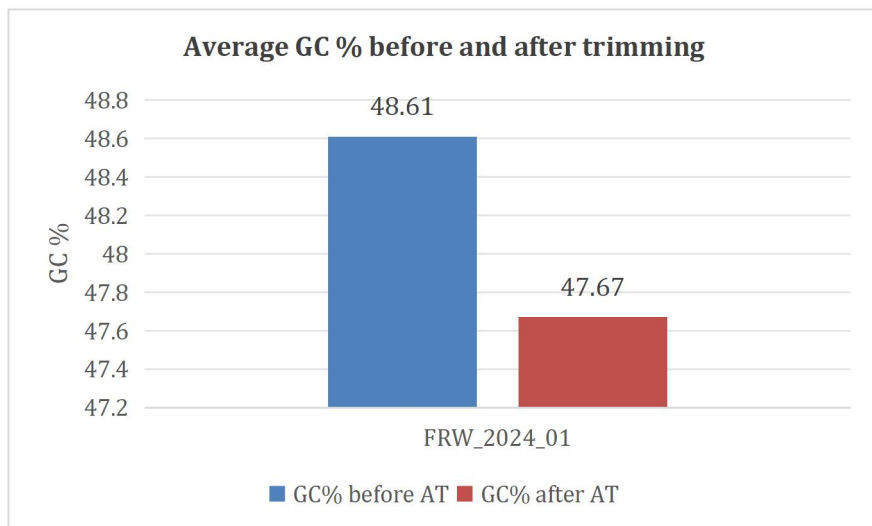

### Denovo Metagenome assembly

Denovo metagenome assembly was carried out using megahit assembler (v1.2). Megahit makes use of succinct *de Bruijn* graphs which are compressed representations of *de Bruijn* graphs. The assembled scaffolds were taken for further downstream analysis. The distribution of scaffolds, N50 values are given in table 2.

**Table 2: Denovo assembly stats**

| Sample name | contigs (>= 1000 bp) | Largest contig | N50   | N75  | L50 |
|-------------|----------------------|----------------|-------|------|-----|
| FRW_2024_01 | 9211                 | 904399         | 11330 | 2084 | 909 |

## ORF Prediction

Open reading frame (ORF) prediction is done using Prodigal (v2.6.3). The assembled scaffolds from the *de novo* assembly is taken for the ORF prediction. The obtained ORFs are filtered using in house Perl scripts. ORFs of length below 200 bp being filtered. Table 4 depicts the ORF length distribution.

**Table 3: ORF length distribution**

| Sample name | Total genes | genes>200bp | 500bp>genes<1000bp | 1000bp>genes |
|-------------|-------------|-------------|--------------------|--------------|
| FRW_2024_01 | 63728       | 25432       | 22594              | 15702        |

## Microbial Diversity

Bacterial kingdom is abundant in all the samples. The taxa wise microbial abundance is given in the supplementary sheet.

### Taxonomy level Comparison

**Figure 6: Distribution of Phylum**

Phylum **Proteobacteria** was the most abundant followed by **Firmicutes** in given sample.

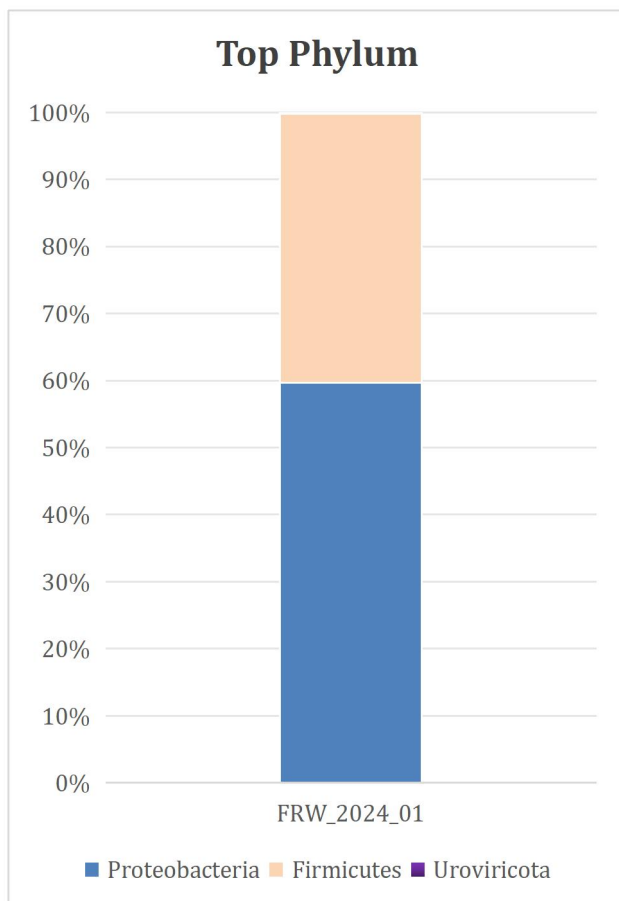

**Figure7: Distribution of Genus**

Genus **Pantoea** was the most abundant followed by **Saccharibacillus** in given sample.

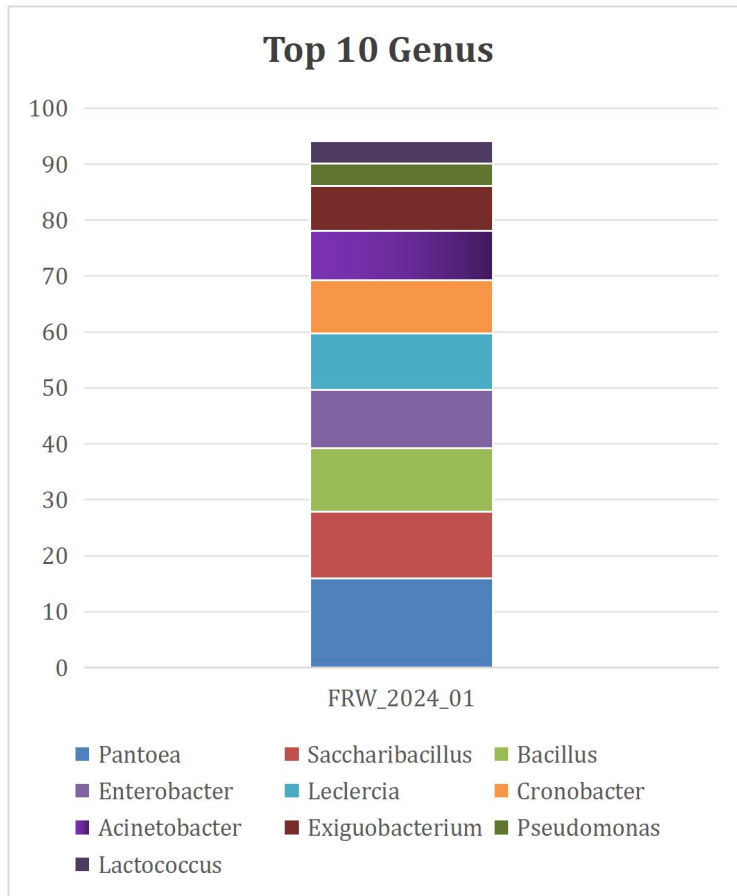

## Supplementary Files:

- Supplementary1.1: Denovo assembly stats
- Supplementary1.2: Gene prediction stats
- Supplementary1.3: Microbial diversity
- Supplementary1.4: Seed Pathways
- Supplementary1.5: Denovo Assembled fasta
- Supplementary1.6: Predicted ORF(fasta)
- Supplementary1.7: Supplementary Images

## References:

1. Li H. and Durbin R. (2009) Fast and accurate short read alignment with Burrows-Wheeler Transform. *Bioinformatics*, 25:1754-60. [PMID: [19451168](https://pubmed.ncbi.nlm.nih.gov/19451168/)]
2. MEGAHIT: an ultra-fast single-node solution for large and complex metagenomics assembly via succinct de Bruijn graph - Dinghua Li, Chi-Man Liu, Ruibang Luo, Kunihiko Sadakane, Tak-Wah Lam *Bioinformatics* - 2015
3. Hyatt D, Chen GL, Locascio PF, Land ML, Larimer FW, Hauser LJ. Prodigal: prokaryotic gene recognition and translation initiation site identification. *BMC Bioinformatics*. 2010;11:119. Published 2010 Mar 8. doi:10.1186/1471-2105-11-119
