# Supplementary material for: Integrating physicochemical and microbial characterization of red rice broth fermented over an 18-hour period augmented with metagenomic and metabolomic approaches
Source: Royal Society of Chemistry journal article supplement (doi:10.1039/d6ra00382f), 2026-04-22

### Supplementary Material 3

#### Supplementary Figure S3. XRF spectra confirming phytate–mineral complexes.

(a) Phytate–Ca<sup>2+</sup>, (b) Phytate–Fe<sup>2+</sup>/Fe<sup>3+</sup>, (c) Phytate–Zn<sup>2+</sup>, and (d) Phytate–Na<sup>+</sup> complexes. Elemental peaks (P and respective metals) confirm mineral incorporation.

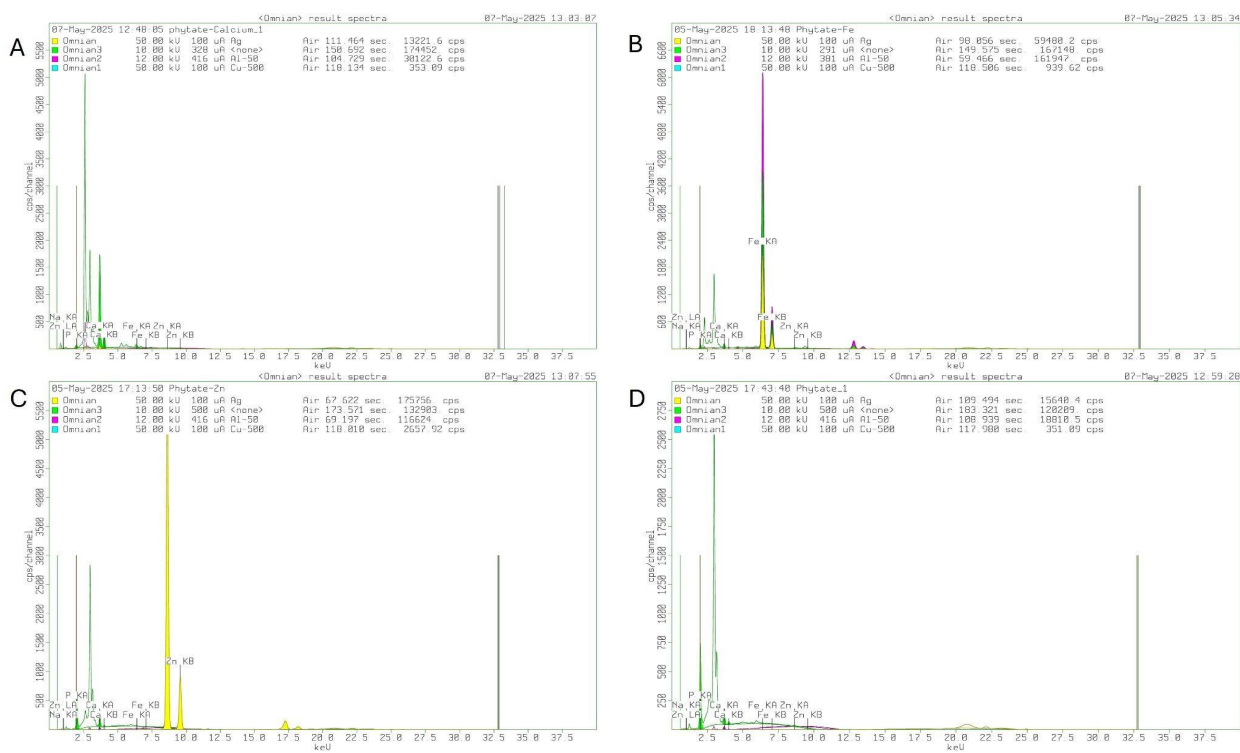

Supplement: d6ra00382f5.pdf [file d6ra00382f5.pdf]
