# Supplementary material for: Integrating physicochemical and microbial characterization of red rice broth fermented over an 18-hour period augmented with metagenomic and metabolomic approaches
Source: Royal Society of Chemistry journal article supplement (doi:10.1039/d6ra00382f), 2026-04-22

## Supplementary Material 4

### Supplementary Figure S1. Metabolomics Workflows for Fermented Red Rice Water Analysis.

Metabolomics: Solvent extraction, chemical derivatization, and untargeted GC–MS with spectral library matching for metabolite identification.

#### Metabolomic Profiling Workflow

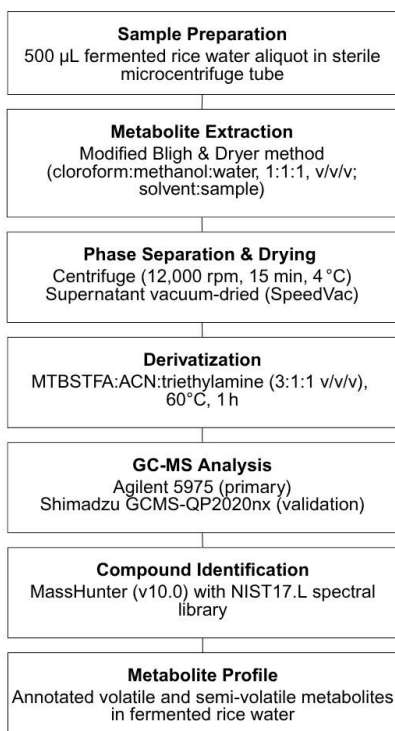

Supplement: d6ra00382f6.pdf [file d6ra00382f6.pdf]
