# Supplementary material for: Integrating physicochemical and microbial characterization of red rice broth fermented over an 18-hour period augmented with metagenomic and metabolomic approaches
Source: Royal Society of Chemistry journal article supplement (doi:10.1039/d6ra00382f), 2026-04-22
Supplement: d6ra00382f7.pdf [file d6ra00382f7.pdf]

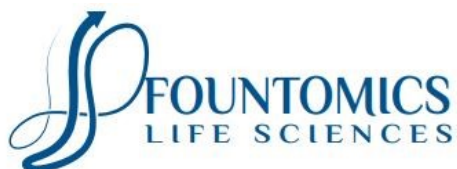

## Metabolite Analysis Report by GCMS

| ORDER INFORMATION    |                |
|----------------------|----------------|
| Investigator         | Srikanth       |
| Company/ Institute   | Sree Biologics |
| Project Code         | 25/03/0041     |
| Sample Received Date | 20/03/2025     |
| Sample Analysis Date | 30/04/2025     |

| SAMPLE INFORMATION        |                             |
|---------------------------|-----------------------------|
| Sample ID                 | Sree PRO-25/03/0041         |
| Analysis                  | Metabolite Analysis by GCMS |
| Sample Concentration Used | NA                          |
| Additional Information    | NA                          |

| INSTRUMENT DETAILS |                   |
|--------------------|-------------------|
| Model              | Agilent GCMS 5975 |
| Make               | Agilent           |
| Software           | Open labs         |

**Office Address :** Flat 111 , Sree Salasara Gardenia, Spring Field Colony, Jeedimetla ,Hyderabad- 500067

**Lab Address :** Lab-1,Avishkaran Incubation Centre , NIPER,Balanagar,500037

Tel : +91 9959166623

email: [info@fountomics.com](mailto:info@fountomics.com)

Web : [www.fountomics.com](http://www.fountomics.com)

**1. Objective:**

To extract and analyze the Metabolites present in the given sample.

**2. Materials:**

| S.No | Item/Chemical Name | Part number           |
|------|--------------------|-----------------------|
| 1    | MTBSTFA            | TCI-CAS RN:25561-30-2 |
| 2    | Triethylamine      | SRL-75198             |
| 3    | MS Grade ACN       | JTBaker               |

**3. Equipment & Instruments Used:**

| S.No | Instrument /Equipment Name | Make     |
|------|----------------------------|----------|
| 1    | Micro Pipette              | BEXCO    |
| 2    | GCMS                       | Shimadzu |

**4. Sample preparation:**

- 500uL of the sample was taken and to that 3 volumes of chloroform: methanol: water is added and incubated at -20°C for 3hrs.
- The sample was centrifuged at 12000 rpm for 15 minutes.
- Supernatant was collected and dried under speed vac.
- The dried sample was then derivatized with 100ul of MTBSTFA: ACN: Triethylamine (3:1:1), incubated in thermomixer at 60°C, for 1hr.

Prepared & Analyzed By



Vahini

Reviewed By



Raju Rapaka
