# Supplementary material for: Integrating physicochemical and microbial characterization of red rice broth fermented over an 18-hour period augmented with metagenomic and metabolomic approaches
Source: Royal Society of Chemistry journal article supplement (doi:10.1039/d6ra00382f), 2026-04-22
Supplement: d6ra00382f8.pdf [file d6ra00382f8.pdf]

## Sample Information

|                       |                     |                           |                                                                                                                                                                              |
|-----------------------|---------------------|---------------------------|------------------------------------------------------------------------------------------------------------------------------------------------------------------------------|
| <b>Name</b>           | Sree PRO-25/03/0041 | <b>Data File Path</b>     | D:\MassHunter\GCMS\1\data\FOUNT_15042025_01.D                                                                                                                                |
| <b>Sample ID</b>      |                     | <b>Acq. Time (Local)</b>  | 15-04-2025 19:00:07 (UTC+05:30)                                                                                                                                              |
| <b>Instrument</b>     | GCMSMS              | <b>Method Path (Acq)</b>  | D:\MassHunter\GCMS\1\methods\Fourtomics_1.M                                                                                                                                  |
| <b>MS Type</b>        | QQQ                 | <b>Version (Acq SW)</b>   | MassHunter GC/MS Acquisition 10.0.384.1 14-Feb-2019 Copyright © 1989-2018 Agilent Technologies, Inc.                                                                         |
| <b>Inj. Vol. (ul)</b> | 1                   | <b>IRM Status</b>         |                                                                                                                                                                              |
| <b>Position</b>       | 2                   | <b>Method Path (DA)</b>   | D:\MassHunter\Methods\10.0\Fount Samples_PM.m                                                                                                                                |
| <b>Plate Pos.</b>     |                     | <b>Target Source Path</b> | D:\MassHunter\Library\NIST17.L;D:\MassHunter\PCDL\default.csv;D:\MassHunter\PCDL\default_GC.csv;D:\MassHunter\PCDL\Pesticide_Example.cdb;D:\MassHunter\PCDL\Test_AM_PCDL.cdb |
| <b>Operator</b>       | HARIKRISHNA         | <b>Result Summary</b>     | 80 identified (82 found)                                                                                                                                                     |

## Sample Chromatograms

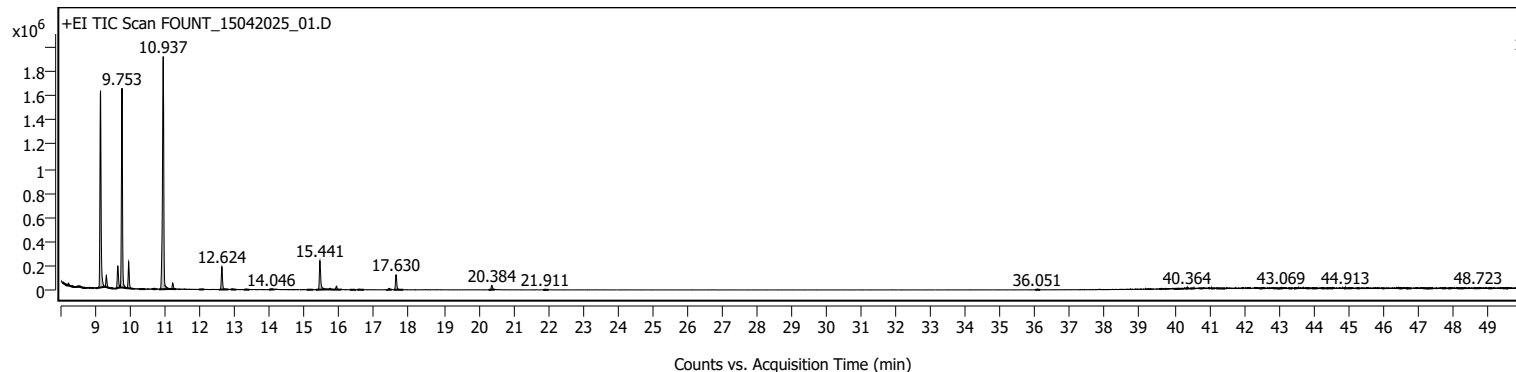

## Compound Summary

| Cpd | Name                                                                                               | Formula           | RT     | Area    | Height  | Hits |
|-----|----------------------------------------------------------------------------------------------------|-------------------|--------|---------|---------|------|
| 1   | Isothiocyanatoacetaldehyde dimethyl acetal                                                         | C5 H9 N O2 S      | 5.114  | 71136   | 20647   | 3    |
| 2   | Propanoic acid, 2,2-dimethyl-, anhydride with diethylborinic acid                                  | C9 H19 B O2       | 5.234  | 109104  | 34780   | 3    |
| 3   | tert-Butylpentamethyldisiloxane                                                                    | C9 H24 O Si2      | 5.463  | 52772   | 22310   | 3    |
| 4   | Acetic acid, TBDMS derivative                                                                      | C8 H18 O2 Si      | 5.903  | 1532951 | 682996  | 3    |
| 5   | 1-Methyl-5-mercaptotetrazole                                                                       | C2 H4 N4 S        | 6.123  | 71701   | 31962   | 3    |
| 6   | Isothiocyanatoacetaldehyde dimethyl acetal                                                         | C5 H9 N O2 S      | 6.223  | 37562   | 14345   | 3    |
| 7   | Tetraethyl ammonium fluoride                                                                       | C8 H20 F N        | 6.448  | 7367    | 2295    | 3    |
| 8   | Isobutanol, TBDMS derivative                                                                       | C10 H24 O Si      | 6.687  | 33883   | 14847   | 3    |
| 9   | Isothiocyanatoacetaldehyde dimethyl acetal                                                         | C5 H9 N O2 S      | 6.771  | 30992   | 12428   | 3    |
| 10  | Disiloxanamine, 1,1,3,3,3-pentamethyl-N-(trimethylsilyl)-                                          | C8 H25 N O Si3    | 7.186  | 161350  | 117577  | 3    |
| 11  | Benzamide, 4-[5-(2,4,6-trimethylbenzylthio)-1-tetrazolyl]-                                         | C18 H19 N5 O S    | 7.226  | 59068   | 34154   | 3    |
| 12  | N-(tert-butyl(dimethylsilyl)-2,2,2-trifluoro-N-methylacetamide                                     | C9 H18 F3 N O Si  | 7.509  | 5910107 | 1268976 | 3    |
| 13  | N-(tert-butyl(dimethylsilyl)-2,2,2-trifluoro-N-methylacetamide                                     | C9 H18 F3 N O Si  | 7.537  | 1075828 | 155636  | 3    |
| 14  | 4-(tert-Butyl)thiane 1,1-dioxide, (+/-)-                                                           | C9 H18 O2 S       | 8.076  | 7600    | 7212    | 3    |
| 15  | 1-Propanethiol, 3-(diethylboronyloxy)-                                                             | C7 H17 B O S      | 8.214  | 48252   | 19185   | 3    |
| 16  | N-(tert-butyl(dimethylsilyl)trifluoroacetamide                                                     | C8 H16 F3 N O Si  | 8.500  | 18175   | 6067    | 3    |
| 17  | 1-Methyl-1-silabenzocyclobutene                                                                    | C8 H10 Si         | 8.549  | 13774   | 6526    | 3    |
| 18  | o-Methyl S-(2-diethylaminoethyl) methylphosphonothiolate                                           | C8 H20 N O2 P S   | 8.653  | 6032    | 2129    | 3    |
| 19  | 1-(((Trimethylsilyloxy)methyl)-1H-1,2,3-benzotriazole                                              | C10 H15 N3 O Si   | 8.813  | 9400    | 4911    | 3    |
| 20  | Benzamide, 4-fluoro-N-(5H-tetrazol-5-yl)-                                                          | C8 H6 F N5 O      | 8.904  | 8666    | 2861    | 3    |
| 21  | Heptyl ethylphosphonofluoridate                                                                    | C9 H20 F O2 P     | 9.135  | 3728653 | 1614764 | 3    |
| 22  | 6-Chloro-3-hydroxypyridazine 1-oxide                                                               | C4 H3 Cl N2 O2    | 9.304  | 202920  | 91933   | 3    |
| 23  | Ethylphosphonic acid, fluoroanhydride, 4-methylcyclohexyl ester                                    | C9 H18 F O2 P     | 9.450  | 8002    | 2587    | 3    |
| 24  | 3-(Methylthio)-1,2,4-triazolo[4,3-b][1,2,4,5]tetrazin-3-amine                                      | C4 H5 N7 S        | 9.633  | 446601  | 182825  | 3    |
| 25  | Benzene, 2-isocyano-1,3-dimethyl-                                                                  | C9 H9 N           | 9.753  | 3501617 | 1640050 | 3    |
| 26  | Boric acid, 3TMS derivative                                                                        | C9 H27 B O3 Si3   | 9.946  | 461052  | 218456  | 3    |
| 27  | Ethleneglycol-n-butylboronate                                                                      | C6 H13 B O2       | 10.259 | 6353    | 1624    | 3    |
| 28  | Silanamine, N-phenyl-                                                                              | C6 H9 N Si        | 10.390 | 7607    | 1979    | 3    |
| 29  | 1-Oxa-2-borata-4-azoniacyclohexan-6-one, 5-(ethoxycarbonyl)-4,4-dimethyl-2,2-bis(trifluoromethyl)- | C10 H14 B F6 N O4 | 10.673 | 18546   | 6952    | 3    |
| 30  | Bis(trimethylsilyl) methylboronate                                                                 | C7 H21 B O2 Si2   | 10.937 | 5144525 | 1926881 | 3    |
| 31  | Bis(trimethylsilyl) methylboronate                                                                 | C7 H21 B O2 Si2   | 11.213 | 121707  | 45952   | 3    |
| 32  | Sulfur tetrafluoride oxide                                                                         | F4 O S            | 12.057 | 9876    | 2412    | 3    |
| 33  | Propanoic acid, 2,2-dimethyl-, cesium salt                                                         | C5 H9 Cs O2       | 12.624 | 462343  | 188411  | 3    |
| 34  | Iron(0), (2,3-dimethylbutadiene)-1,2-bis(diisopropylphosphino)ethane                               | C20 H42 Fe P2     | 12.924 | 14779   | 4922    | 3    |
| 35  | 6-Chloro-3-hydroxypyridazine 1-oxide                                                               | C4 H3 Cl N2 O2    | 13.329 | 14371   | 4420    | 3    |
| 36  | 1-Methylsilacyclohexane                                                                            | C6 H14 Si         | 14.046 | 17691   | 4562    | 3    |
| 37  | Borinic acid, diethyl-                                                                             | C4 H11 B O        | 15.151 | 11988   | 2944    | 3    |

## Compound Summary

| Cpd | Name                                                                                                          | Formula           | RT     | Area   | Height | Hits |
|-----|---------------------------------------------------------------------------------------------------------------|-------------------|--------|--------|--------|------|
| 38  | 2,2',2''-Nitrilotriethanol, triethyl ether                                                                    | C12 H27 N O3      | 15.441 | 657272 | 237651 | 3    |
| 39  | Ethyl 1H-tetrazole-5-acetate, TBDMS derivative                                                                | C11 H22 N4 O2 Si  | 15.731 | 35377  | 9869   | 3    |
| 40  | Boric acid, 3TMS derivative                                                                                   | C9 H27 B O3 Si3   | 15.916 | 67889  | 25729  | 3    |
| 41  | Isothiocyanatoacetaldehyde dimethyl acetal                                                                    | C5 H9 N O2 S      | 16.371 | 7345   | 1706   | 3    |
| 42  | Isothiocyanatoacetaldehyde dimethyl acetal                                                                    | C5 H9 N O2 S      | 16.571 | 16123  | 3965   | 3    |
| 43  | L-Leucine, N-(2-methoxyethoxycarbonyl)-, butyl ester                                                          | C14 H27 N O5      | 17.430 | 32927  | 11080  | 3    |
| 44  | Bis(tert-butyltrimethylsilyl) carbonate                                                                       | C13 H30 O3 Si2    | 17.630 | 326932 | 121804 | 3    |
| 45  | Bis(trimethylsilyl) methylboronate                                                                            | C7 H21 B O2 Si2   | 20.384 | 96327  | 35000  | 3    |
| 46  | Isothiocyanatoacetaldehyde dimethyl acetal                                                                    | C5 H9 N O2 S      | 21.911 | 16593  | 4854   | 3    |
| 47  |                                                                                                               |                   | 36.051 | 16483  | 5396   | 0    |
| 48  | Caprolactone oxime, (NB)-O-[(diethylboryloxy)(ethyl)boryl]-                                                   | C12 H25 B2 N O2   | 40.021 | 8012   | 2045   | 3    |
| 49  | Tris(tert-butyltrimethylsilyloxy)arsane                                                                       | C18 H45 As O3 Si3 | 40.077 | 10357  | 2328   | 3    |
| 50  | Arsenous acid, tris(trimethylsilyl) ester                                                                     | C9 H27 As O3 Si3  | 40.236 | 7080   | 2909   | 3    |
| 51  | Tris(tert-butyltrimethylsilyloxy)arsane                                                                       | C18 H45 As O3 Si3 | 40.364 | 11551  | 4359   | 3    |
| 52  | Arsenous acid, tris(trimethylsilyl) ester                                                                     | C9 H27 As O3 Si3  | 40.540 | 10879  | 2914   | 3    |
| 53  | Tris(tert-butyltrimethylsilyloxy)arsane                                                                       | C18 H45 As O3 Si3 | 40.765 | 6450   | 2872   | 3    |
| 54  | Arsenous acid, tris(trimethylsilyl) ester                                                                     | C9 H27 As O3 Si3  | 41.088 | 7550   | 3358   | 3    |
| 55  | 1-Isopropoxy-5-propyl-2,3-bis-trimethylsilyl-1,2-dihydroborinine                                              | C17 H35 B O Si2   | 41.234 | 13047  | 2659   | 3    |
| 56  | Arsenous acid, tris(trimethylsilyl) ester                                                                     | C9 H27 As O3 Si3  | 41.412 | 8762   | 2287   | 3    |
| 57  | Tris(tert-butyltrimethylsilyloxy)arsane                                                                       | C18 H45 As O3 Si3 | 42.511 | 7530   | 3049   | 3    |
| 58  | Tris(tert-butyltrimethylsilyloxy)arsane                                                                       | C18 H45 As O3 Si3 | 42.858 | 10839  | 2763   | 3    |
| 59  | Tris(tert-butyltrimethylsilyloxy)arsane                                                                       | C18 H45 As O3 Si3 | 43.069 | 10160  | 3734   | 3    |
| 60  | Tris(tert-butyltrimethylsilyloxy)arsane                                                                       | C18 H45 As O3 Si3 | 43.309 | 11926  | 4016   | 3    |
| 61  | Tris(tert-butyltrimethylsilyloxy)arsane                                                                       | C18 H45 As O3 Si3 | 43.453 | 8570   | 2645   | 3    |
| 62  | Tris(tert-butyltrimethylsilyloxy)arsane                                                                       | C18 H45 As O3 Si3 | 43.815 | 7809   | 2928   | 3    |
| 63  | Tris(tert-butyltrimethylsilyloxy)arsane                                                                       | C18 H45 As O3 Si3 | 43.997 | 7625   | 2751   | 3    |
| 64  | Tris(tert-butyltrimethylsilyloxy)arsane                                                                       | C18 H45 As O3 Si3 | 44.071 | 8040   | 3170   | 3    |
| 65  | Tris(tert-butyltrimethylsilyloxy)arsane                                                                       | C18 H45 As O3 Si3 | 44.266 | 7015   | 4400   | 3    |
| 66  | Tris(tert-butyltrimethylsilyloxy)arsane                                                                       | C18 H45 As O3 Si3 | 44.424 | 8596   | 3097   | 3    |
| 67  | (R)-9-[(S)-2-(Hydroxymethyl)pyrrolidin-1-yl]-3-methyl-3,4-dihydro-2H-benzo[b][1,4,5]oxathiazepine 1,1-dioxide | C14 H20 N2 O4 S   | 44.475 | 6289   | 1767   | 3    |
| 68  | Tris(tert-butyltrimethylsilyloxy)arsane                                                                       | C18 H45 As O3 Si3 | 44.913 | 6725   | 4674   | 3    |
| 69  | Tris(tert-butyltrimethylsilyloxy)arsane                                                                       | C18 H45 As O3 Si3 | 45.024 | 10693  | 3947   | 3    |
| 70  | 1-Isopropoxy-5-propyl-2,3-bis-trimethylsilyl-1,2-dihydroborinine                                              | C17 H35 B O Si2   | 45.281 | 6142   | 1906   | 2    |
| 71  | Tris(tert-butyltrimethylsilyloxy)arsane                                                                       | C18 H45 As O3 Si3 | 46.002 | 6519   | 2596   | 3    |
| 72  | Tris(tert-butyltrimethylsilyloxy)arsane                                                                       | C18 H45 As O3 Si3 | 46.506 | 6735   | 1862   | 3    |
| 73  |                                                                                                               |                   | 46.687 | 9504   | 2933   | 0    |
| 74  | Tris(tert-butyltrimethylsilyloxy)arsane                                                                       | C18 H45 As O3 Si3 | 47.246 | 8681   | 1941   | 3    |
| 75  | O,O-Dimethyl [1-(4-methyl-1,2,5-oxadiazol-3-ylamino)-1-(2-fluorophenyl)methyl]phosphonate                     | C12 H15 F N3 O4 P | 47.343 | 12471  | 3216   | 3    |
| 76  | Tris(tert-butyltrimethylsilyloxy)arsane                                                                       | C18 H45 As O3 Si3 | 47.751 | 8470   | 2359   | 3    |
| 77  | Tris(tert-butyltrimethylsilyloxy)arsane                                                                       | C18 H45 As O3 Si3 | 47.924 | 9455   | 3245   | 3    |
| 78  | N,N-Dimethyl-4-nitroso-3-(trimethylsilyl)aniline                                                              | C11 H18 N2 O Si   | 48.234 | 10268  | 2459   | 3    |
| 79  | 1-Boraindane, 3-methyl-1-[1-(trimethylsilyl)-2,4-cyclopentadien-3-yl]-                                        | C17 H23 B Si      | 48.280 | 6315   | 2718   | 3    |
| 80  | Tris(tert-butyltrimethylsilyloxy)arsane                                                                       | C18 H45 As O3 Si3 | 48.723 | 11715  | 3159   | 3    |
| 81  | Tris(tert-butyltrimethylsilyloxy)arsane                                                                       | C18 H45 As O3 Si3 | 49.082 | 7743   | 3227   | 3    |
| 82  | Tris(tert-butyltrimethylsilyloxy)arsane                                                                       | C18 H45 As O3 Si3 | 49.560 | 9278   | 3323   | 3    |

## Compound Details

### Cpd. 1: Isothiocyanatoacetaldehyde dimethyl acetal

| Name                                       | Formula      | RT    | CAS        | ID Source | Score | Algorithm | Lib/DB   |
|--------------------------------------------|--------------|-------|------------|-----------|-------|-----------|----------|
| Isothiocyanatoacetaldehyde dimethyl acetal | C5 H9 N O2 S | 5.114 | 75052-04-9 | LibSearch | 45.14 | Integrate | NIST17.L |

### Compound ID Table

| Name                                                                             | Formula    | ID Source | RT    | CAS          | Score |
|----------------------------------------------------------------------------------|------------|-----------|-------|--------------|-------|
| Isothiocyanatoacetaldehyde dimethyl acetal                                       | C5H9NO2S   | LibSearch | 5.114 | 75052-04-9   | 45.14 |
| N-[1-[4-Chlorophenyl]-1H-tetrazol-5-yl]-N',N'-diethyl-N-methyl-1,2-ethanediamine | C14H21ClN6 | LibSearch | 5.114 | 1000213-46-2 | 38.14 |
| Ethanol, 2-(diethylamino)-, N-oxide                                              | C6H15NO2   | LibSearch | 5.114 | 16684-49-4   | 38.06 |

Structure

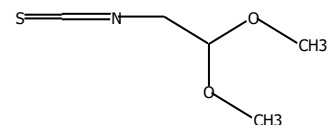

Compound Spectra (overlaid)

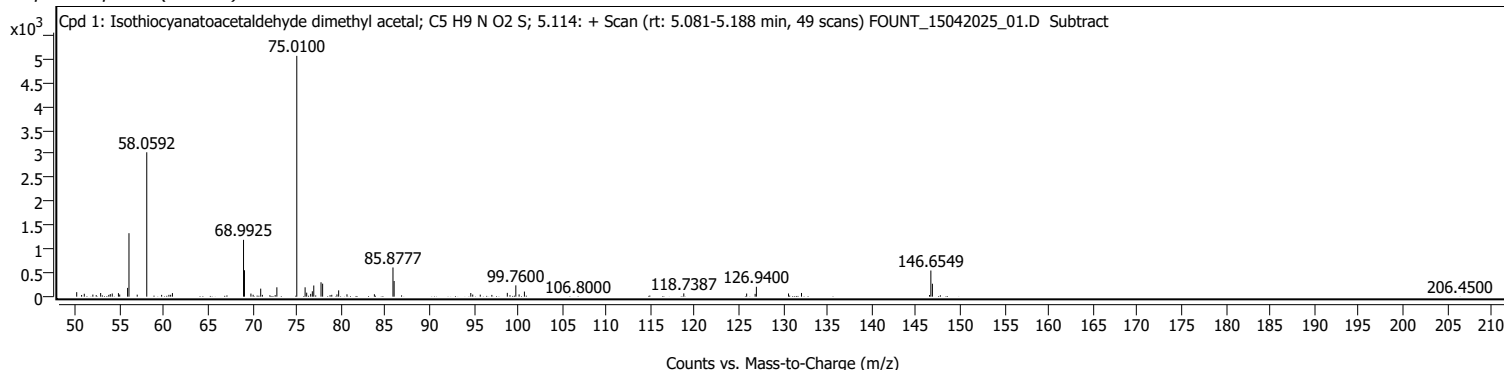

Isothiocyanatoacetaldehyde dimethyl acetal

| m/z (prec.) | Species | CE | Score (Lib) | Score (Fwd) | Score (Rev) | Lib/DB   |
|-------------|---------|----|-------------|-------------|-------------|----------|
|             |         |    | 45.14       |             |             | NIST17.L |

Library Match Details

| m/z (prec.) | Species | CE | Score (Lib) | Score (Fwd) | Score (Rev) | Lib/DB   |
|-------------|---------|----|-------------|-------------|-------------|----------|
|             |         |    | 45.14       |             |             | NIST17.L |

Observed Spectrum

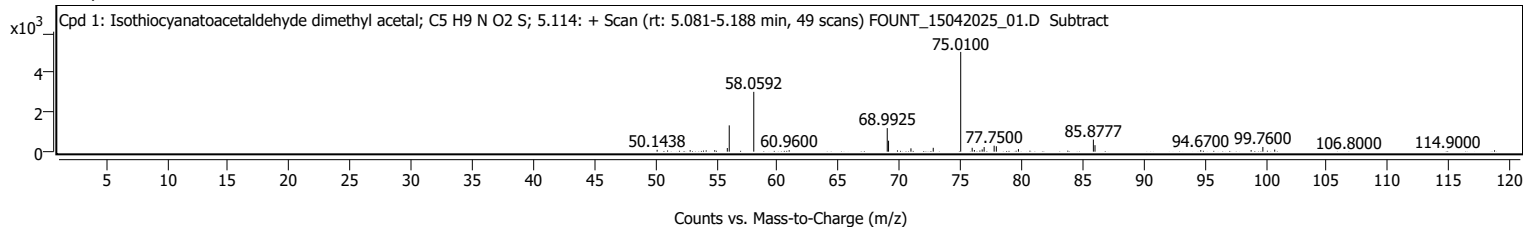

Library Spectrum

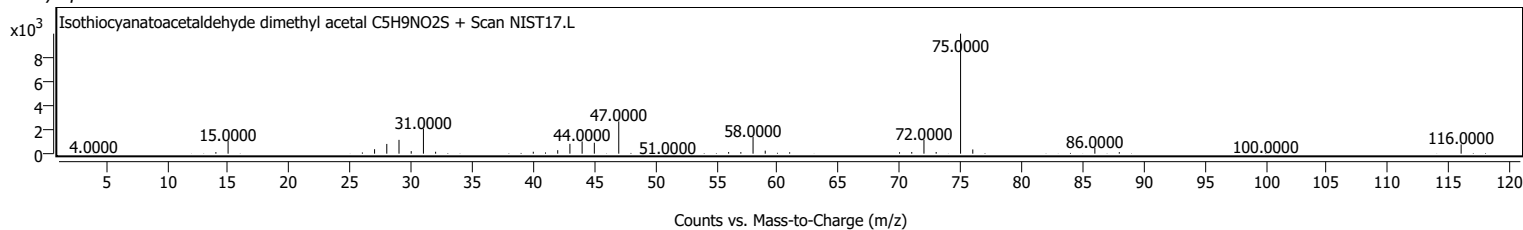

Cpd. 2: Propanoic acid, 2,2-dimethyl-, anhydride with diethylboronic acid

| Name                                                              | Formula     | RT    | CAS        | ID Source | Score | Algorithm | Lib/DB   |
|-------------------------------------------------------------------|-------------|-------|------------|-----------|-------|-----------|----------|
| Propanoic acid, 2,2-dimethyl-, anhydride with diethylboronic acid | C9 H19 B O2 | 5.234 | 34574-27-1 | LibSearch | 64.34 | Integrate | NIST17.L |

Compound ID Table

| Name                                                              | Formula  | ID Source | RT    | CAS        | Score |
|-------------------------------------------------------------------|----------|-----------|-------|------------|-------|
| Propanoic acid, 2,2-dimethyl-, anhydride with diethylboronic acid | C9H19BO2 | LibSearch | 5.234 | 34574-27-1 | 64.34 |
| Aluminum, triethyl-                                               | C6H15Al  | LibSearch | 5.234 | 97-93-8    | 60.91 |
| Boric acid, diethyl-                                              | C4H11BO  | LibSearch | 5.234 | 4426-31-7  | 59.54 |

Structure

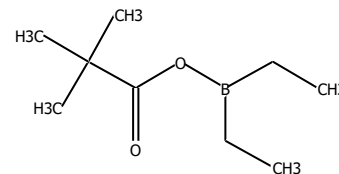

Compound Spectra (overlaid)

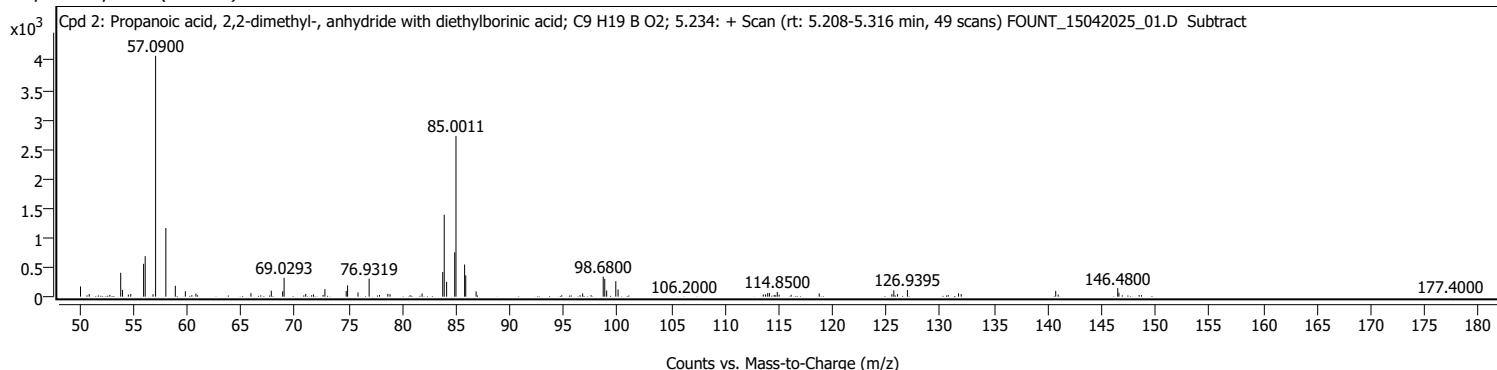

Propanoic acid, 2,2-dimethyl-, anhydride with diethylboronic acid

| m/z (prec.) | Species | CE | Score (Lib) | Score (Fwd) | Score (Rev) | Lib/DB   |
|-------------|---------|----|-------------|-------------|-------------|----------|
| 64.34       |         |    |             |             |             | NIST17.L |

Library Match Details

| m/z (prec.) | Species | CE | Score (Lib) | Score (Fwd) | Score (Rev) | Lib/DB   |
|-------------|---------|----|-------------|-------------|-------------|----------|
| 64.34       |         |    |             |             |             | NIST17.L |

Observed Spectrum

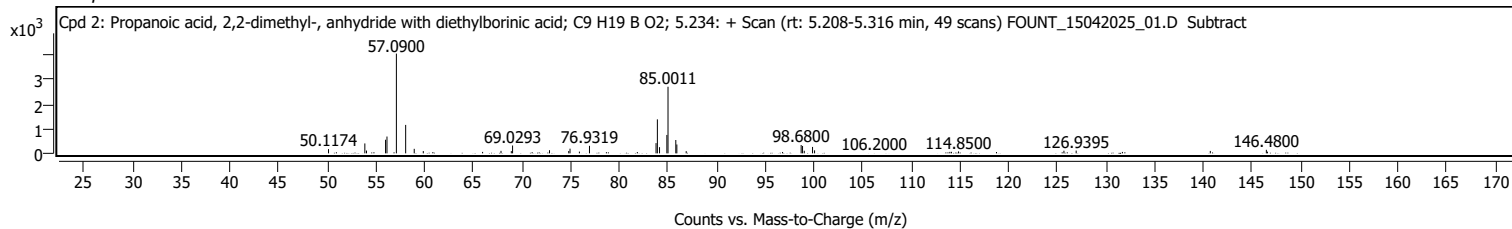

Library Spectrum

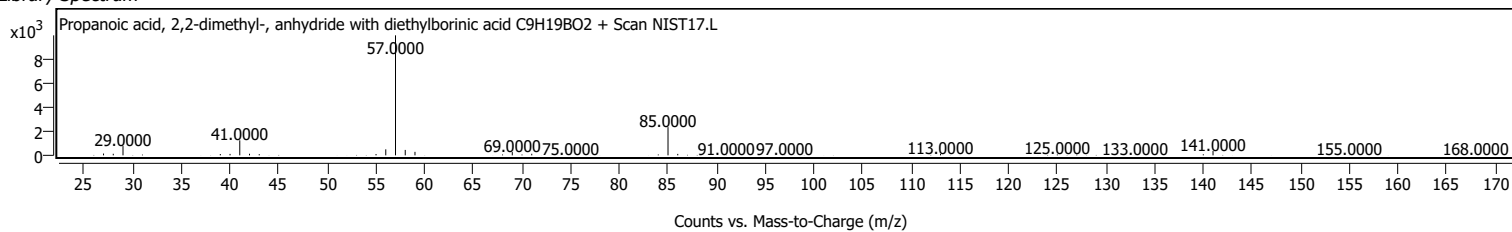

Cpd. 3: tert-Butylpentamethyldisiloxane

| Name                            | Formula    | RT    | CAS        | ID Source | Score | Algorithm | Lib/DB   |
|---------------------------------|------------|-------|------------|-----------|-------|-----------|----------|
| tert-Butylpentamethyldisiloxane | C9H24O Si2 | 5.463 | 67875-54-1 | LibSearch | 55.09 | Integrate | NIST17.L |

Compound ID Table

| Name                                                            | Formula    | ID Source | RT    | CAS          | Score |
|-----------------------------------------------------------------|------------|-----------|-------|--------------|-------|
| tert-Butylpentamethyldisiloxane                                 | C9H24OSi2  | LibSearch | 5.463 | 67875-54-1   | 55.09 |
| 3-[1-(4-Methoxy-phenyl)-1H-tetrazol-5-ylsulfanyl]-propionitrile | C11H11N5OS | LibSearch | 5.463 | 1000274-76-2 | 54.30 |
| Disiloxane, hexamethyl-                                         | C6H18OSi2  | LibSearch | 5.463 | 107-46-0     | 53.73 |

Structure

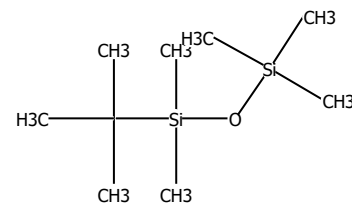

Compound Spectra (overlaid)

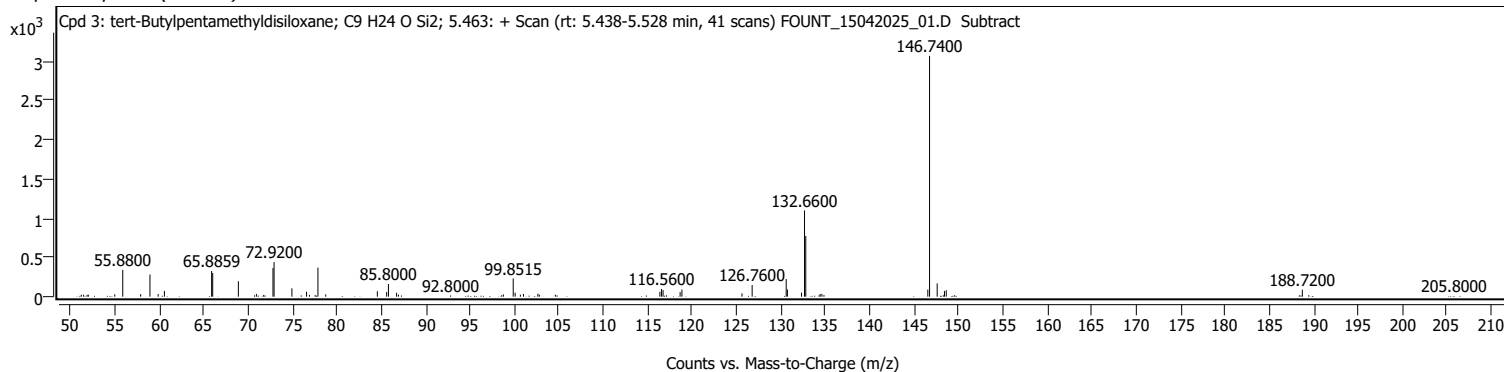

tert-Butylpentamethyldisiloxane

| m/z (prec.) | Species | CE | Score (Lib) | Score (Fwd) | Score (Rev) | Lib/DB   |
|-------------|---------|----|-------------|-------------|-------------|----------|
|             |         |    | 55.09       |             |             | NIST17.L |

Library Match Details

| m/z (prec.) | Species | CE | Score (Lib) | Score (Fwd) | Score (Rev) | Lib/DB   |
|-------------|---------|----|-------------|-------------|-------------|----------|
|             |         |    | 55.09       |             |             | NIST17.L |

Observed Spectrum

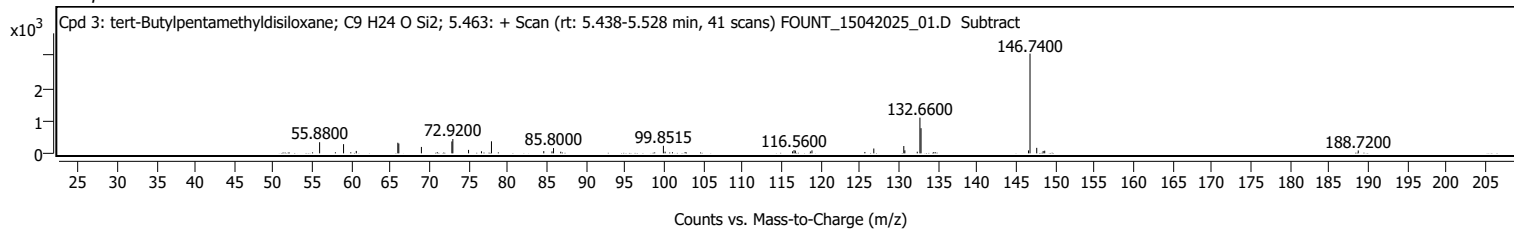

Library Spectrum

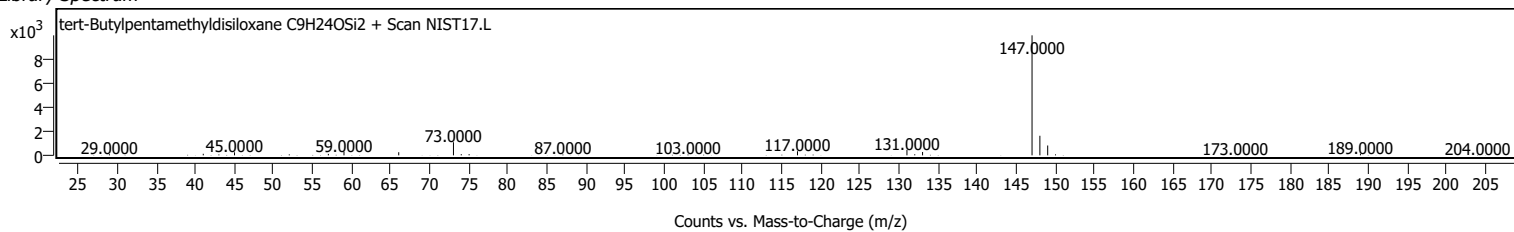

Cpd. 4: Acetic acid, TBDMS derivative

| Name                          | Formula      | RT    | CAS        | ID Source | Score | Algorithm | Lib/DB   |
|-------------------------------|--------------|-------|------------|-----------|-------|-----------|----------|
| Acetic acid, TBDMS derivative | C8 H18 O2 Si | 5.903 | 37170-48-2 | LibSearch | 64.06 | Integrate | NIST17.L |

Compound ID Table

| Name                                          | Formula   | ID Source | RT    | CAS        | Score |
|-----------------------------------------------|-----------|-----------|-------|------------|-------|
| Acetic acid, TBDMS derivative                 | C8H18O2Si | LibSearch | 5.903 | 37170-48-2 | 64.06 |
| Acetic acid, TBDMS derivative                 | C8H18O2Si | LibSearch | 5.903 | 37170-48-2 | 62.15 |
| Propan-2-ol, O-tert-butylidimethylsilyl ether | C9H22OSi  | LibSearch | 5.903 | 17348-66-2 | 61.17 |

Structure

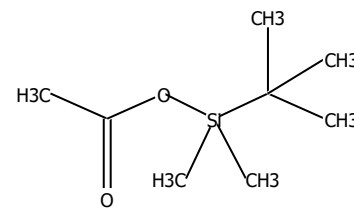

Compound Spectra (overlaid)

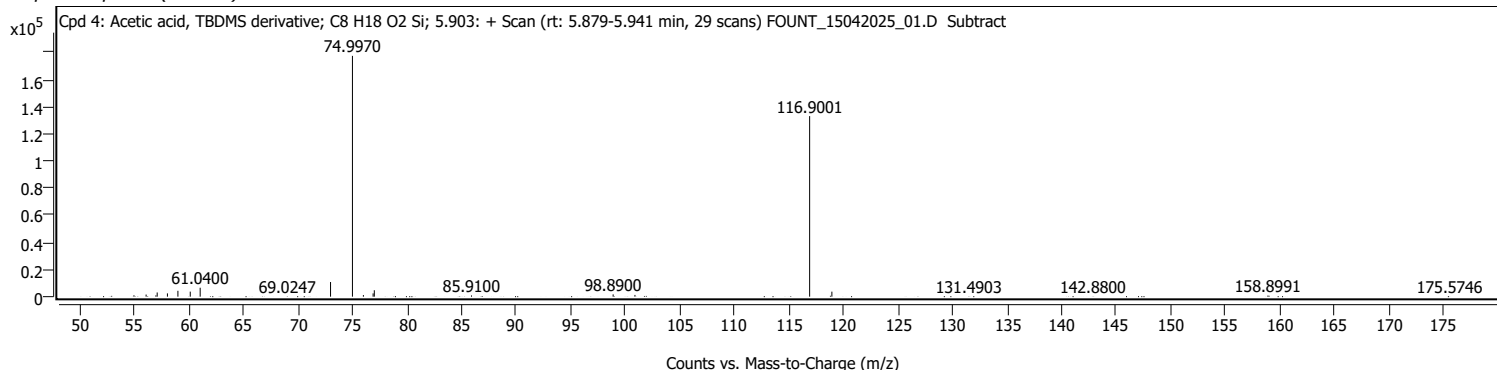

Acetic acid, TBDMS derivative

| m/z (prec.) | Species | CE | Score (Lib) | Score (Fwd) | Score (Rev) | Lib/DB   |
|-------------|---------|----|-------------|-------------|-------------|----------|
|             |         |    | 64.06       |             |             | NIST17.L |

Library Match Details

| m/z (prec.) | Species | CE | Score (Lib) | Score (Fwd) | Score (Rev) | Lib/DB   |
|-------------|---------|----|-------------|-------------|-------------|----------|
|             |         |    | 64.06       |             |             | NIST17.L |

Observed Spectrum

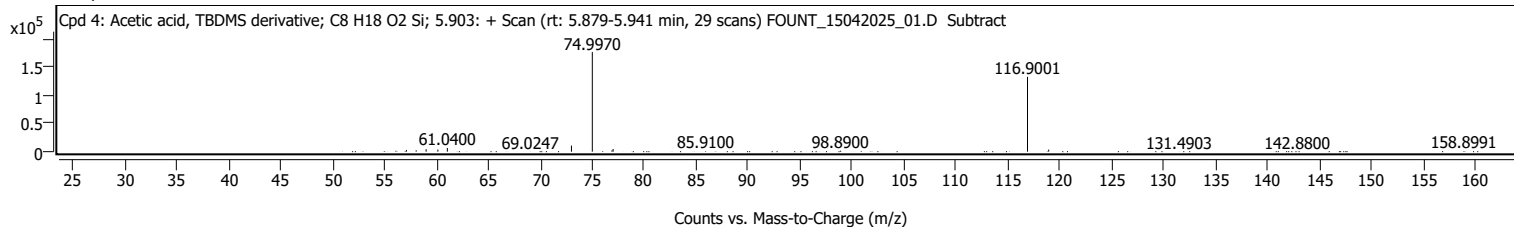

Library Spectrum

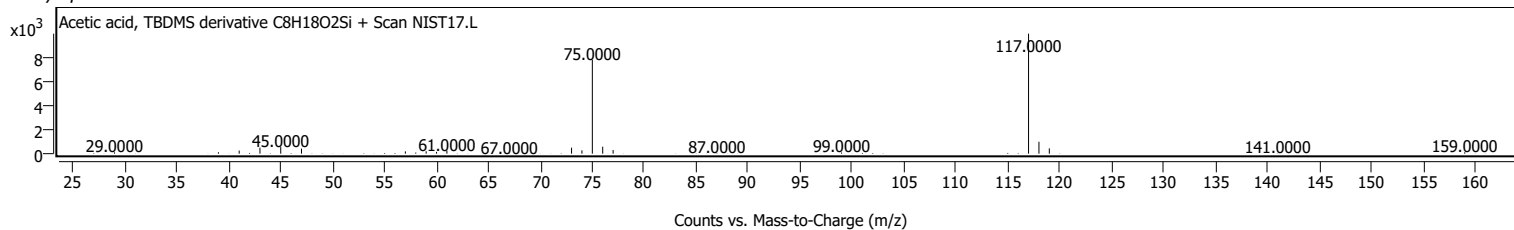

Cpd. 5: 1-Methyl-5-mercaptotetrazole

| Name                         | Formula    | RT    | CAS        | ID Source | Score | Algorithm | Lib/DB   |
|------------------------------|------------|-------|------------|-----------|-------|-----------|----------|
| 1-Methyl-5-mercaptotetrazole | C2 H4 N4 S | 6.123 | 13183-79-4 | LibSearch | 61.91 | Integrate | NIST17.L |

Compound ID Table

| Name                                       | Formula  | ID Source | RT    | CAS        | Score |
|--------------------------------------------|----------|-----------|-------|------------|-------|
| 1-Methyl-5-mercaptotetrazole               | C2H4N4S  | LibSearch | 6.123 | 13183-79-4 | 61.91 |
| 1-Methyl-5-mercaptotetrazole               | C2H4N4S  | LibSearch | 6.123 | 13183-79-4 | 59.50 |
| Isothiocyanatoacetaldehyde dimethyl acetal | C5H9NO2S | LibSearch | 6.123 | 75052-04-9 | 50.89 |

Structure

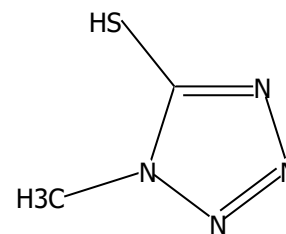

Compound Spectra (overlaid)

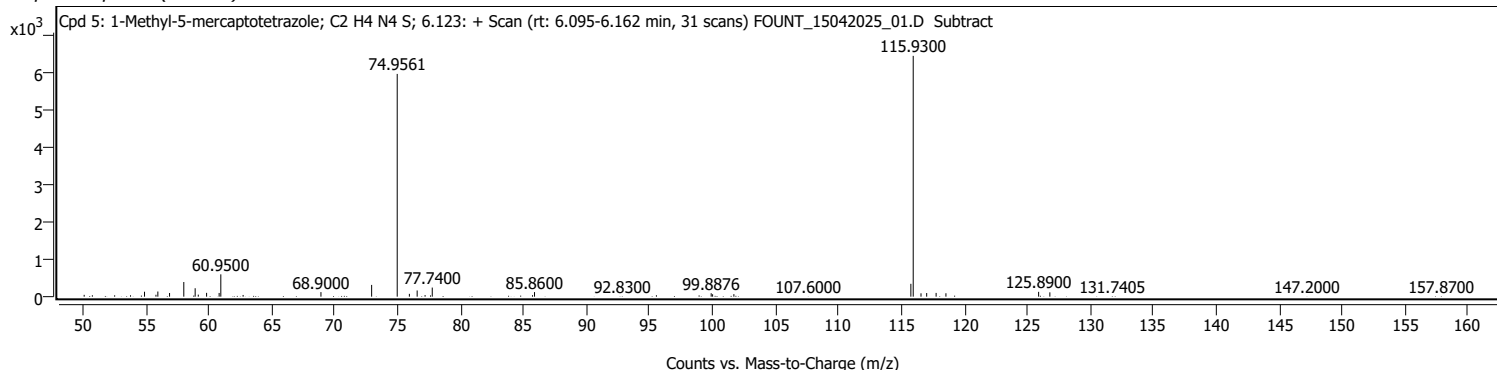

1-Methyl-5-mercaptotetrazole

| m/z (prec.) | Species | CE | Score (Lib) | Score (Fwd) | Score (Rev) | Lib/DB   |
|-------------|---------|----|-------------|-------------|-------------|----------|
| 61.91       |         |    | 61.91       |             |             | NIST17.L |

Library Match Details

| m/z (prec.) | Species | CE | Score (Lib) | Score (Fwd) | Score (Rev) | Lib/DB   |
|-------------|---------|----|-------------|-------------|-------------|----------|
| 61.91       |         |    | 61.91       |             |             | NIST17.L |

Observed Spectrum

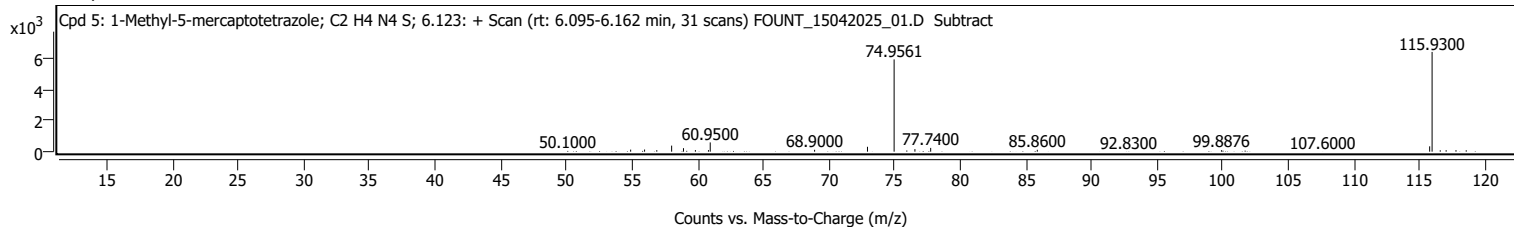

Library Spectrum

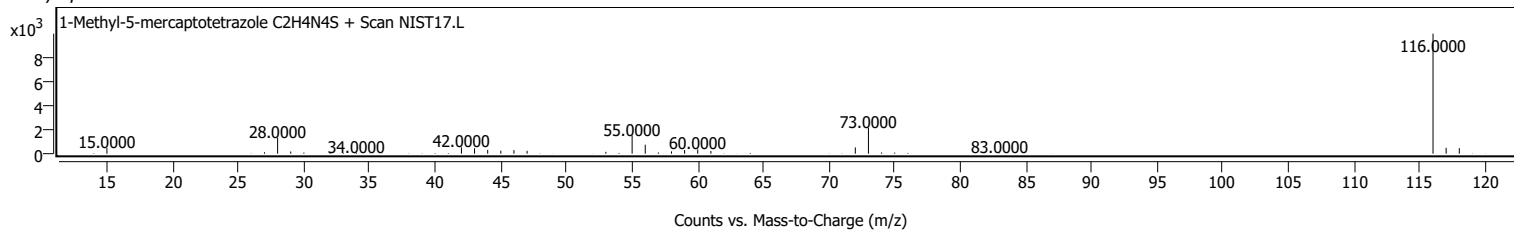

Cpd. 6: Isothiocyanatoacetaldehyde dimethyl acetal

| Name                                       | Formula  | RT    | CAS        | ID Source | Score | Algorithm | Lib/DB   |
|--------------------------------------------|----------|-------|------------|-----------|-------|-----------|----------|
| Isothiocyanatoacetaldehyde dimethyl acetal | C5H9NO2S | 6.223 | 75052-04-9 | LibSearch | 50.59 | Integrate | NIST17.L |

Compound ID Table

| Name                                       | Formula     | ID Source | RT    | CAS        | Score |
|--------------------------------------------|-------------|-----------|-------|------------|-------|
| Isothiocyanatoacetaldehyde dimethyl acetal | C5H9NO2S    | LibSearch | 6.223 | 75052-04-9 | 50.59 |
| Trimethylsilyl isothiocyanate              | C4H9NSSi    | LibSearch | 6.223 | 2290-65-5  | 46.33 |
| Benzethonium Chloride                      | C27H42ClNO2 | LibSearch | 6.223 | 121-54-0   | 44.02 |

Structure



Compound Spectra (overlaid)

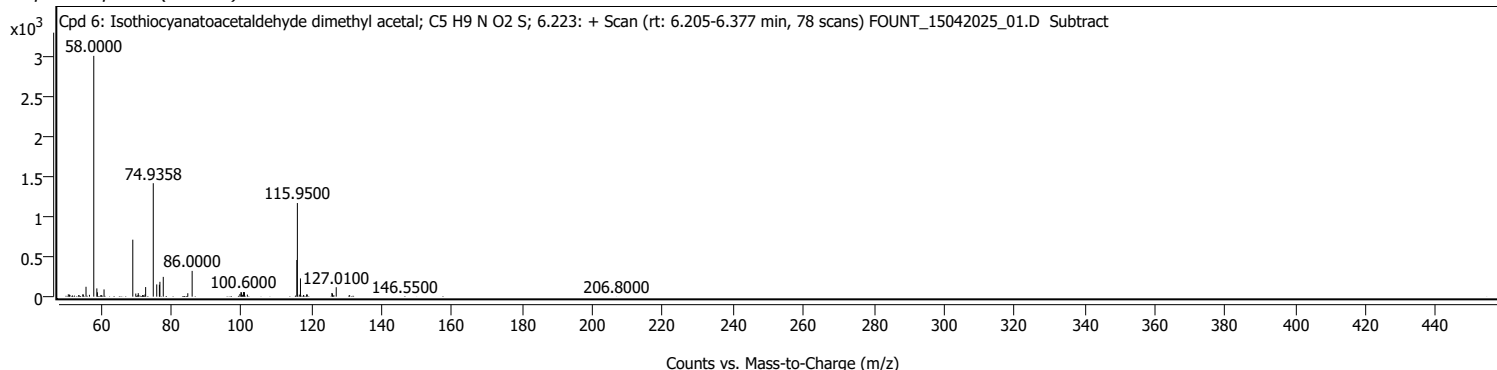

Isothiocyanatoacetaldehyde dimethyl acetal

| m/z (prec.) | Species | CE | Score (Lib) | Score (Fwd) | Score (Rev) | Lib/DB   |
|-------------|---------|----|-------------|-------------|-------------|----------|
| 50.59       |         |    |             |             |             | NIST17.L |

Library Match Details

| m/z (prec.) | Species | CE | Score (Lib) | Score (Fwd) | Score (Rev) | Lib/DB   |
|-------------|---------|----|-------------|-------------|-------------|----------|
| 50.59       |         |    |             |             |             | NIST17.L |

Observed Spectrum

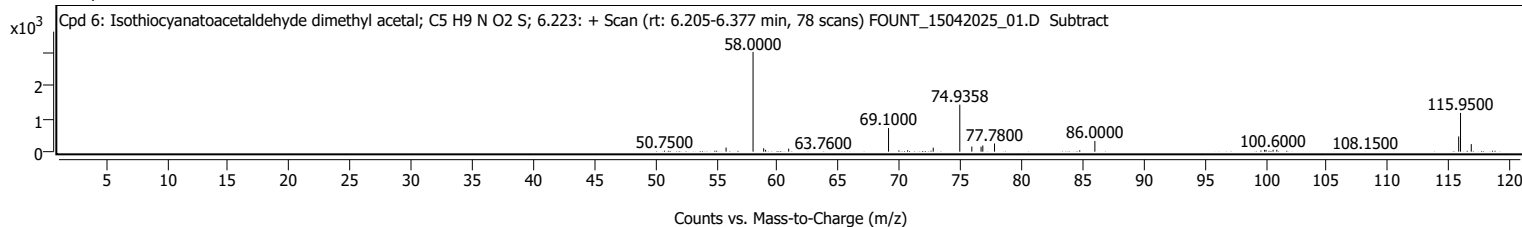

Library Spectrum

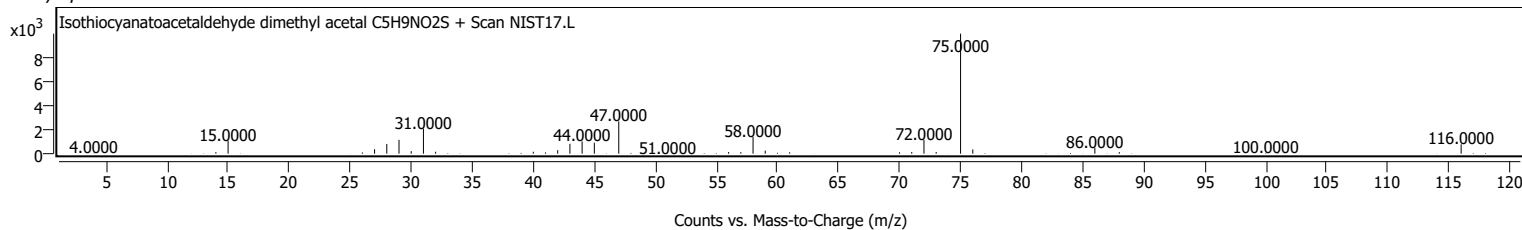

Cpd. 7: Tetraethyl ammonium fluoride

| Name                         | Formula    | RT    | CAS      | ID Source | Score | Algorithm | Lib/DB   |
|------------------------------|------------|-------|----------|-----------|-------|-----------|----------|
| Tetraethyl ammonium fluoride | C8 H20 F N | 6.448 | 665-46-3 | LibSearch | 43.29 | Integrate | NIST17.L |

Compound ID Table

| Name                         | Formula  | ID Source | RT    | CAS       | Score |
|------------------------------|----------|-----------|-------|-----------|-------|
| Tetraethyl ammonium fluoride | C8H20FN  | LibSearch | 6.448 | 665-46-3  | 43.29 |
| Tetraethylammonium chloride  | C8H20ClN | LibSearch | 6.448 | 56-34-8   | 41.77 |
| Arsine                       | AsH3     | LibSearch | 6.448 | 7784-42-1 | 40.20 |

Structure

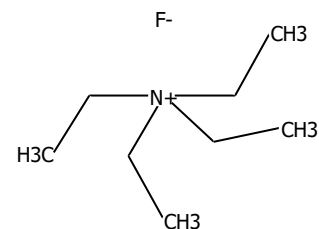

Compound Spectra (overlaid)

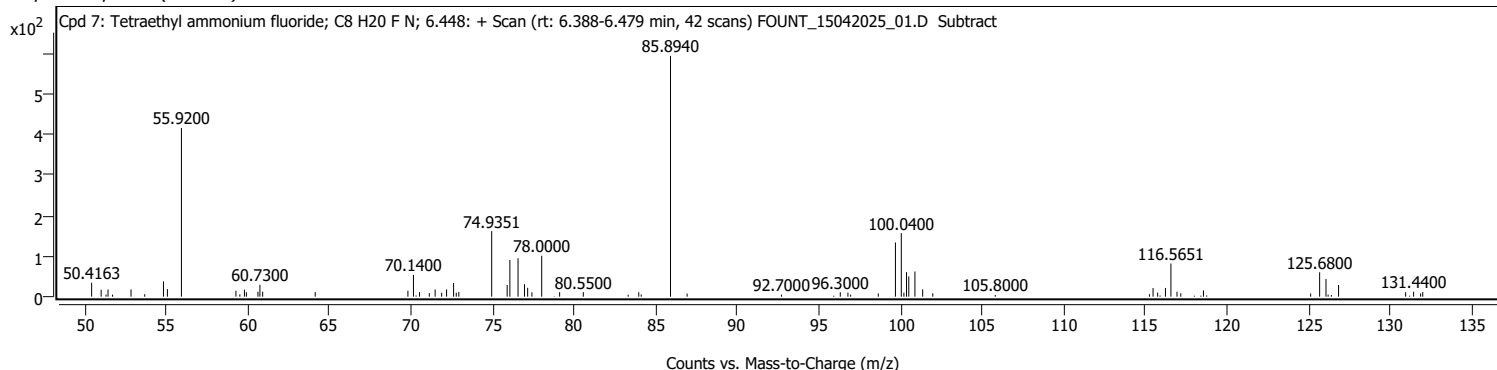

Tetraethyl ammonium fluoride

| m/z (prec.) | Species | CE | Score (Lib) | Score (Fwd) | Score (Rev) | Lib/DB   |
|-------------|---------|----|-------------|-------------|-------------|----------|
|             |         |    | 43.29       |             |             | NIST17.L |

Library Match Details

| m/z (prec.) | Species | CE | Score (Lib) | Score (Fwd) | Score (Rev) | Lib/DB   |
|-------------|---------|----|-------------|-------------|-------------|----------|
|             |         |    | 43.29       |             |             | NIST17.L |

Observed Spectrum

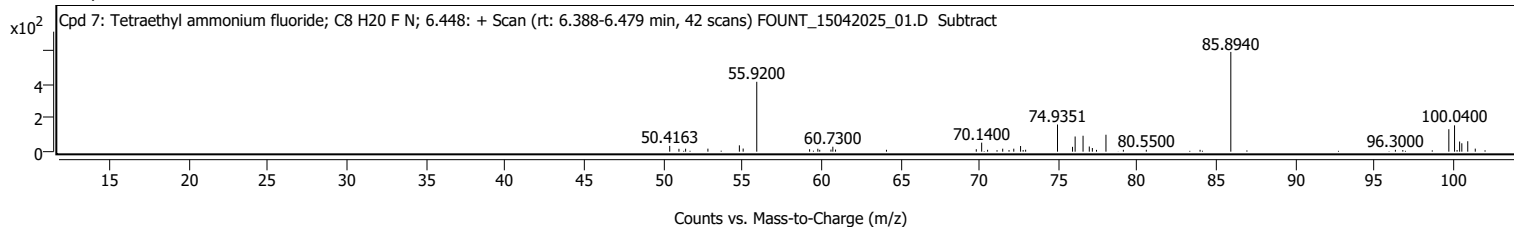

Library Spectrum

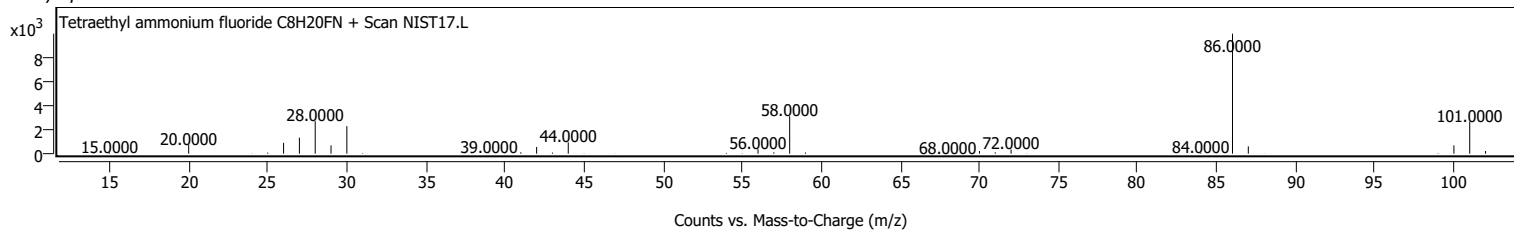

Cpd. 8: Isobutanol, TBDMS derivative

| Name                         | Formula    | RT    | CAS          | ID Source | Score | Algorithm | Lib/DB   |
|------------------------------|------------|-------|--------------|-----------|-------|-----------|----------|
| Isobutanol, TBDMS derivative | C10H24O Si | 6.687 | 1000333-00-3 | LibSearch | 54.21 | Integrate | NIST17.L |

Compound ID Table

| Name                                 | Formula   | ID Source | RT    | CAS          | Score |
|--------------------------------------|-----------|-----------|-------|--------------|-------|
| Isobutanol, TBDMS derivative         | C10H24OSi | LibSearch | 6.687 | 1000333-00-3 | 54.21 |
| 1-Propanethiol, 3-(diethylboryloxy)- | C7H17BOS  | LibSearch | 6.687 | 1000161-78-5 | 54.07 |
| 1-Butanol, TBDMS derivative          | C10H24OSi | LibSearch | 6.687 | 1000333-04-7 | 52.25 |

Structure

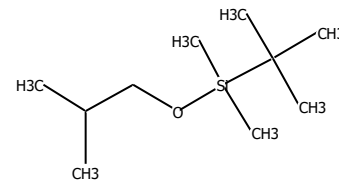

Compound Spectra (overlaid)

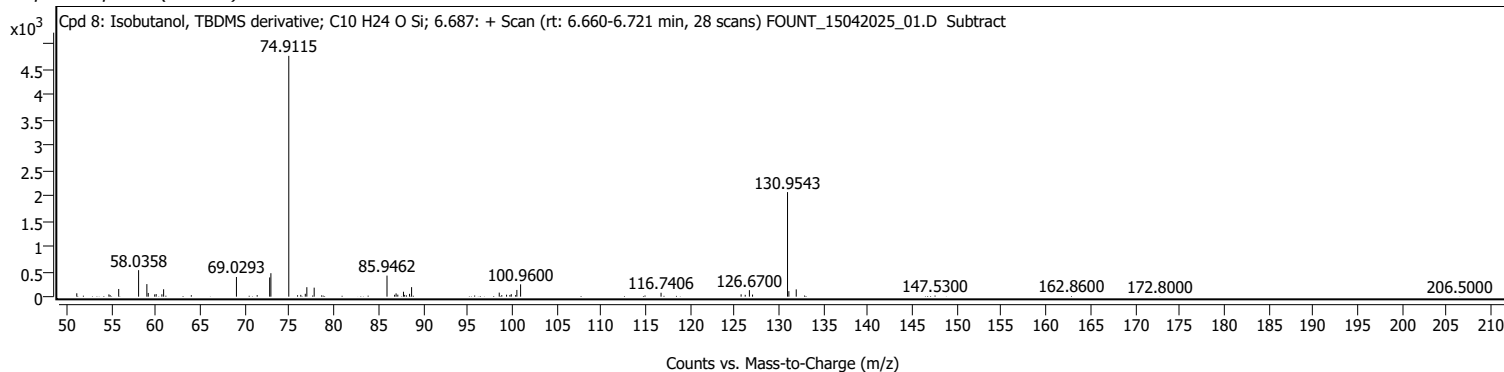

Isobutanol, TBDMS derivative

| m/z (prec.) | Species | CE | Score (Lib) | Score (Fwd) | Score (Rev) | Lib/DB   |
|-------------|---------|----|-------------|-------------|-------------|----------|
|             |         |    | 54.21       |             |             | NIST17.L |

Library Match Details

| m/z (prec.) | Species | CE | Score (Lib) | Score (Fwd) | Score (Rev) | Lib/DB   |
|-------------|---------|----|-------------|-------------|-------------|----------|
|             |         |    | 54.21       |             |             | NIST17.L |

Observed Spectrum

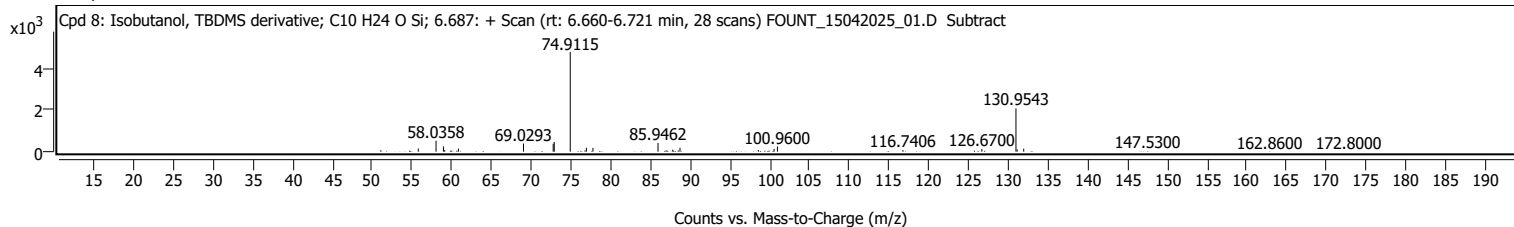

Library Spectrum

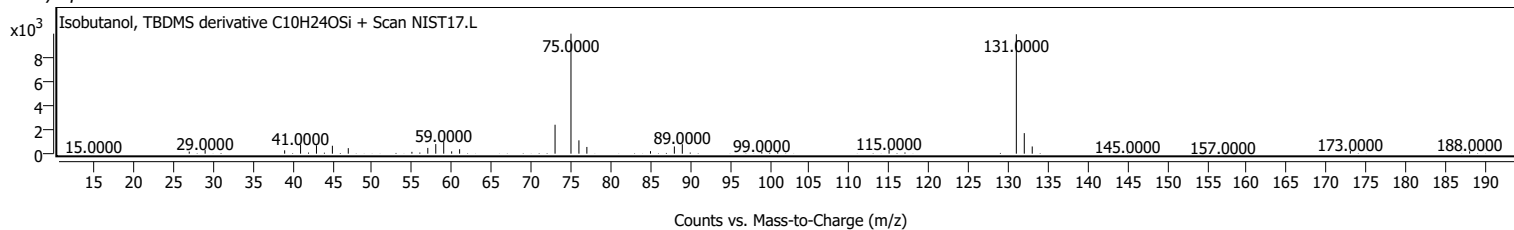

Cpd. 9: Isothiocyanatoacetaldehyde dimethyl acetal

| Name                                       | Formula  | RT    | CAS        | ID Source | Score | Algorithm | Lib/DB   |
|--------------------------------------------|----------|-------|------------|-----------|-------|-----------|----------|
| Isothiocyanatoacetaldehyde dimethyl acetal | C5H9NO2S | 6.771 | 75052-04-9 | LibSearch | 40.04 | Integrate | NIST17.L |

Compound ID Table

| Name                                       | Formula  | ID Source | RT    | CAS        | Score |
|--------------------------------------------|----------|-----------|-------|------------|-------|
| Isothiocyanatoacetaldehyde dimethyl acetal | C5H9NO2S | LibSearch | 6.771 | 75052-04-9 | 40.04 |
| Borinic acid, diethyl-                     | C4H11BO  | LibSearch | 6.771 | 4426-31-7  | 38.07 |
| Borinic acid, diethyl-                     | C4H11BO  | LibSearch | 6.771 | 4426-31-7  | 37.77 |

Structure



### Compound Spectra (overlaid)

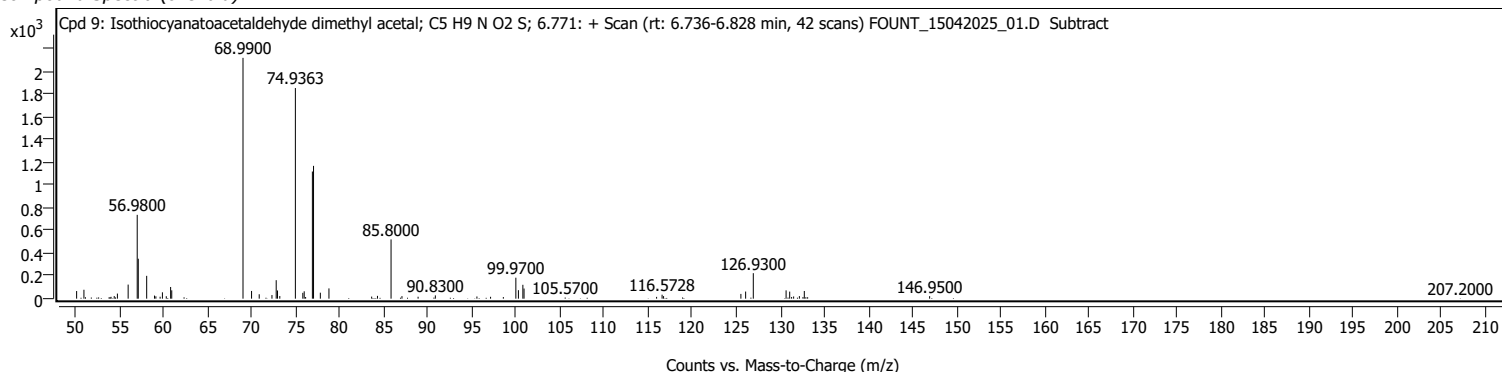

### Isothiocyanatoacetaldehyde dimethyl acetal

| m/z (prec.) | Species | CE | Score (Lib) | Score (Fwd) | Score (Rev) | Lib/DB   |
|-------------|---------|----|-------------|-------------|-------------|----------|
|             |         |    | 40.04       |             |             | NIST17.L |

### Library Match Details

| m/z (prec.) | Species | CE | Score (Lib) | Score (Fwd) | Score (Rev) | Lib/DB   |
|-------------|---------|----|-------------|-------------|-------------|----------|
|             |         |    | 40.04       |             |             | NIST17.L |

### Observed Spectrum

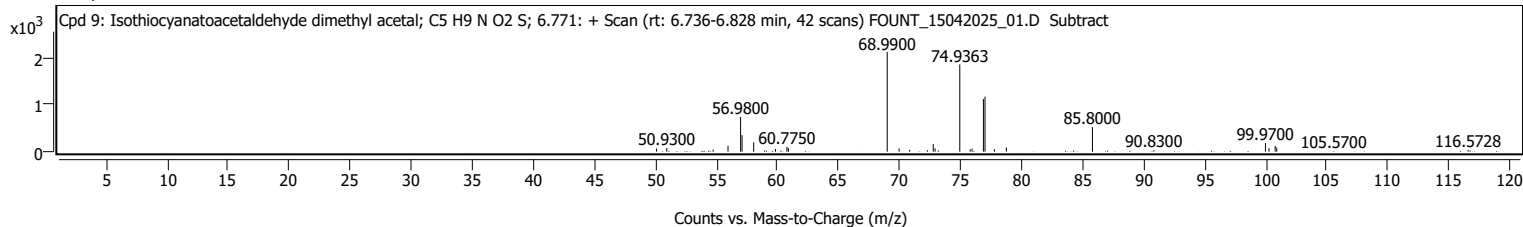

### Library Spectrum



### Cpd. 10: Disiloxanamine, 1,1,3,3,3-pentamethyl-N-(trimethylsilyl)-

| Name                                                      | Formula        | RT    | CAS        | ID Source | Score | Algorithm | Lib/DB   |
|-----------------------------------------------------------|----------------|-------|------------|-----------|-------|-----------|----------|
| Disiloxanamine, 1,1,3,3,3-pentamethyl-N-(trimethylsilyl)- | C8 H25 N O Si3 | 7.186 | 17883-25-9 | LibSearch | 60.25 | Integrate | NIST17.L |

### Compound ID Table

| Name                                                      | Formula    | ID Source | RT    | CAS        | Score |
|-----------------------------------------------------------|------------|-----------|-------|------------|-------|
| Disiloxanamine, 1,1,3,3,3-pentamethyl-N-(trimethylsilyl)- | C8H25NOSi3 | LibSearch | 7.186 | 17883-25-9 | 60.25 |
| 4-Chloropyridazine 1-oxide                                | C4H3ClN2O  | LibSearch | 7.186 | 7217-74-5  | 41.52 |
| 3-Chloropyridazine 1-oxide                                | C4H3ClN2O  | LibSearch | 7.186 | 7217-73-4  | 37.59 |

Structure

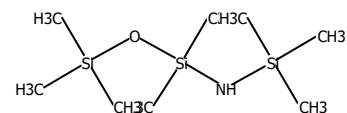

Compound Spectra (overlaid)

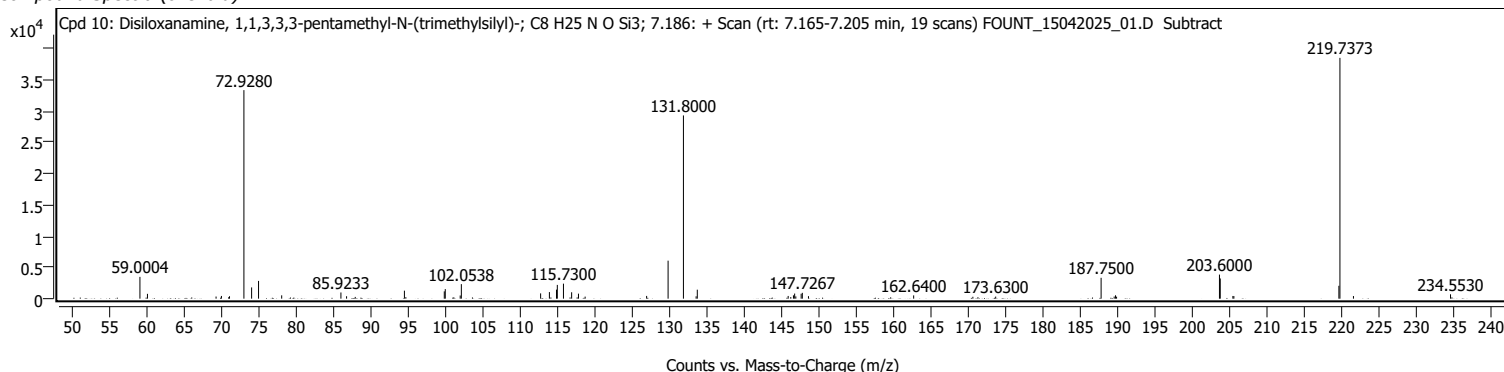

Disiloxanamine,  
1,1,3,3,3-pentamethyl-  
N-(trimethylsilyl)-

| m/z (prec.) | Species | CE | Score (Lib) | Score (Fwd) | Score (Rev) | Lib/DB   |
|-------------|---------|----|-------------|-------------|-------------|----------|
|             |         |    | 60.25       |             |             | NIST17.L |

Library Match Details

| m/z (prec.) | Species | CE | Score (Lib) | Score (Fwd) | Score (Rev) | Lib/DB   |
|-------------|---------|----|-------------|-------------|-------------|----------|
|             |         |    | 60.25       |             |             | NIST17.L |

Observed Spectrum

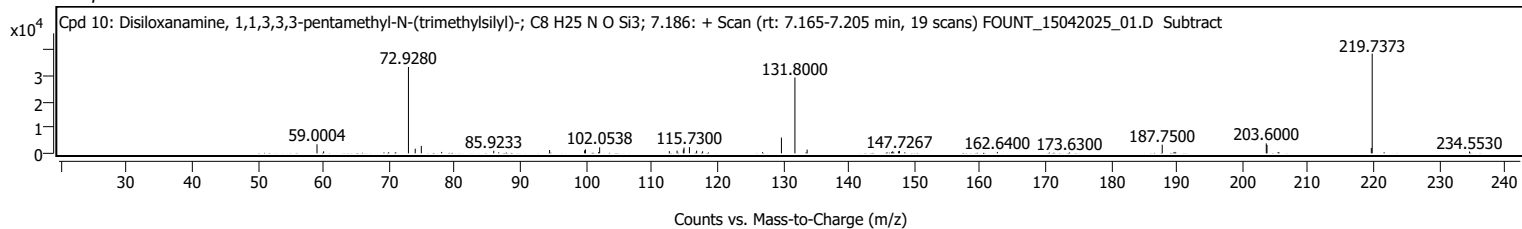

Library Spectrum

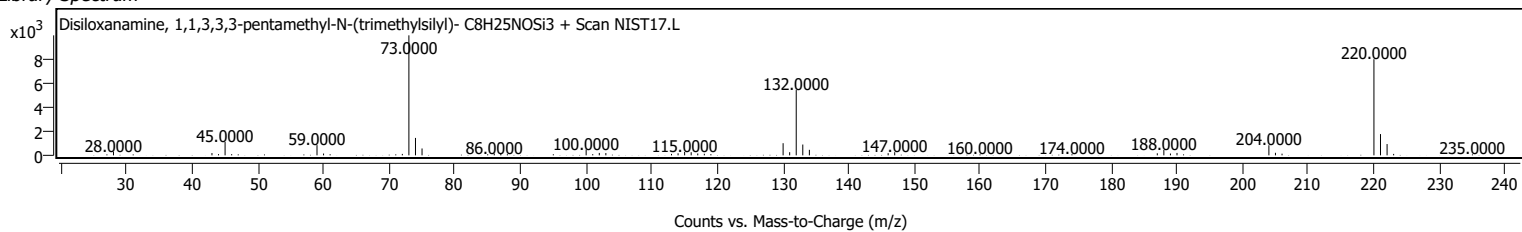

**Cpd. 11: Benzamide, 4-[5-(2,4,6-trimethylbenzylthio)-1-tetrazolyl]-**

| Name                                                       | Formula        | RT    | CAS         | ID Source | Score | Algorithm | Lib/DB   |
|------------------------------------------------------------|----------------|-------|-------------|-----------|-------|-----------|----------|
| Benzamide, 4-[5-(2,4,6-trimethylbenzylthio)-1-tetrazolyl]- | C18 H19 N5 O S | 7.226 | 309735-33-9 | LibSearch | 54.10 | Integrate | NIST17.L |

Compound ID Table

| Name                                                       | Formula    | ID Source | RT    | CAS         | Score |
|------------------------------------------------------------|------------|-----------|-------|-------------|-------|
| Benzamide, 4-[5-(2,4,6-trimethylbenzylthio)-1-tetrazolyl]- | C18H19N5OS | LibSearch | 7.226 | 309735-33-9 | 54.10 |
| Di-trimethylsilyl peroxide                                 | C6H18O2Si2 | LibSearch | 7.226 | 5796-98-5   | 46.10 |
| Di-trimethylsilyl peroxide                                 | C6H18O2Si2 | LibSearch | 7.226 | 5796-98-5   | 44.93 |

Structure

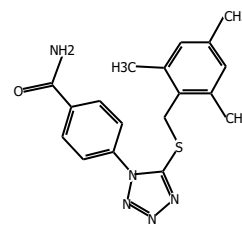

Compound Spectra (overlaid)

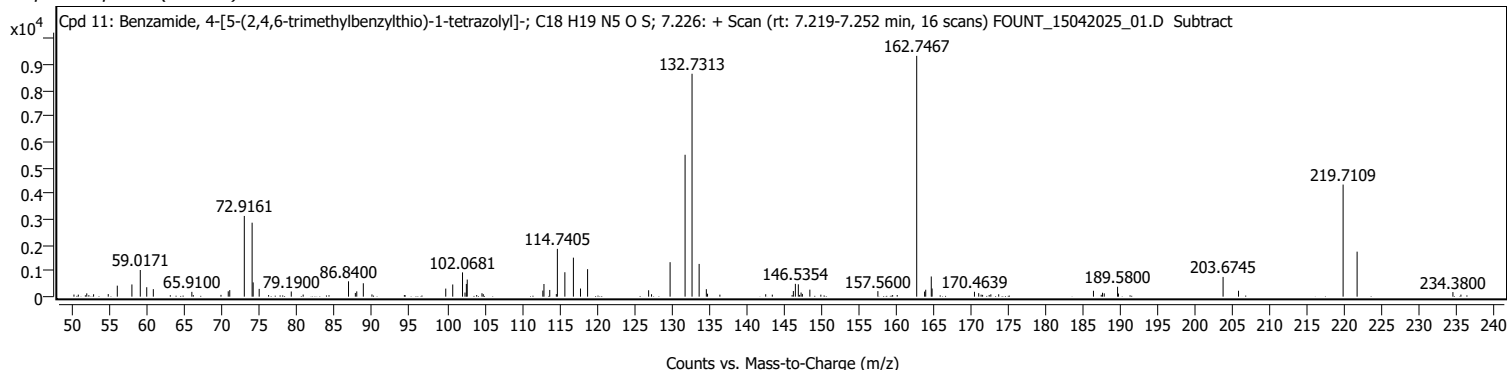

Benzamide, 4-[5-(2,4,6-trimethylbenzylthio)-1-tetrazolyl]-

| m/z (prec.) | Species | CE | Score (Lib) | Score (Fwd) | Score (Rev) | Lib/DB   |
|-------------|---------|----|-------------|-------------|-------------|----------|
| 54.10       |         |    | 54.10       |             |             | NIST17.L |

Library Match Details

| m/z (prec.) | Species | CE | Score (Lib) | Score (Fwd) | Score (Rev) | Lib/DB   |
|-------------|---------|----|-------------|-------------|-------------|----------|
| 54.10       |         |    | 54.10       |             |             | NIST17.L |

Observed Spectrum

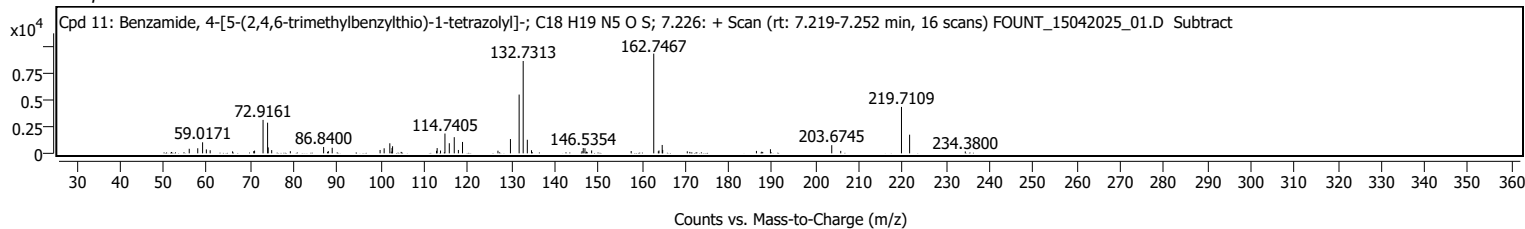

Library Spectrum

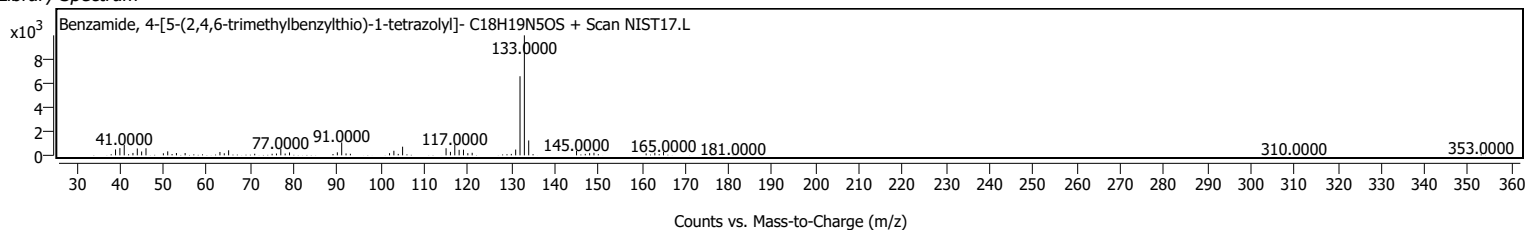

Cpd. 12: N-(tert-butylidimethylsilyl)-2,2,2-trifluoro-N-methylacetamide

| Name                                                           | Formula          | RT    | CAS          | ID Source | Score | Algorithm | Lib/DB   |
|----------------------------------------------------------------|------------------|-------|--------------|-----------|-------|-----------|----------|
| N-(tert-butylidimethylsilyl)-2,2,2-trifluoro-N-methylacetamide | C9 H18 F3 N O Si | 7.509 | 1000458-45-7 | LibSearch | 62.85 | Integrate | NIST17.L |

Compound ID Table

| Name                                                           | Formula     | ID Source | RT    | CAS          | Score |
|----------------------------------------------------------------|-------------|-----------|-------|--------------|-------|
| N-(tert-butylidimethylsilyl)-2,2,2-trifluoro-N-methylacetamide | C9H18F3NOSi | LibSearch | 7.509 | 1000458-45-7 | 62.85 |
| N-(tert-butylidimethylsilyl)trifluoroacetamide                 | C8H16F3NOSi | LibSearch | 7.509 | 83170-48-3   | 62.17 |
| N-Methyltrifluoroacetamide, TMS derivative                     | C6H12F3NOSi | LibSearch | 7.509 | 24589-78-4   | 39.02 |

Structure

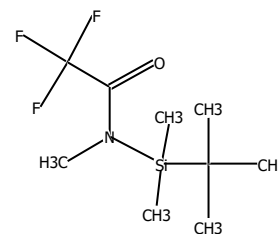

Compound Spectra (overlaid)

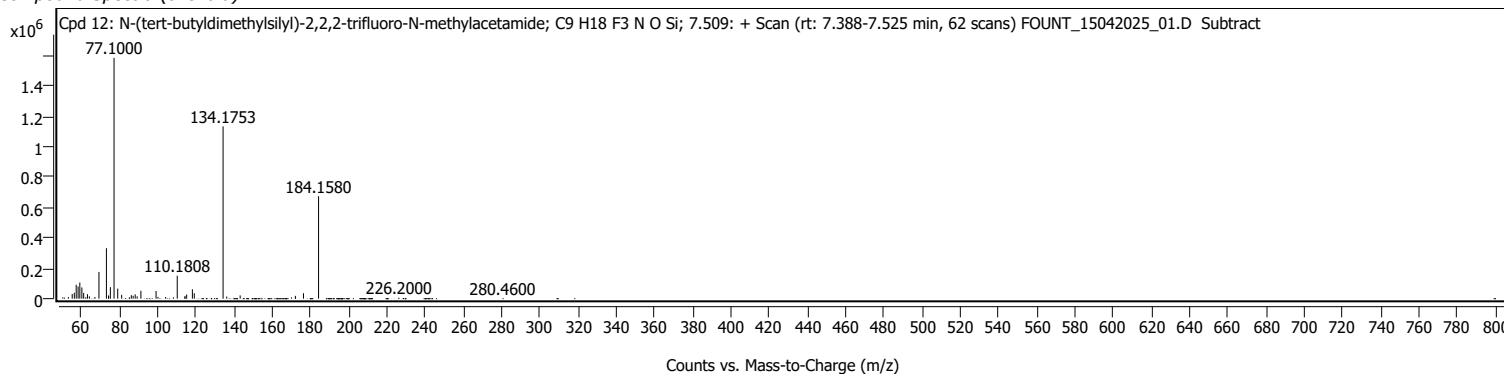

*N*-(*tert*-butyl(dimethylsilyl))-2,2,2-trifluoro-*N*-methylacetamide

| m/z (prec.) | Species | CE | Score (Lib) | Score (Fwd) | Score (Rev) | Lib/DB   |
|-------------|---------|----|-------------|-------------|-------------|----------|
|             |         |    | 62.85       |             |             | NIST17.L |

Library Match Details

| m/z (prec.) | Species | CE | Score (Lib) | Score (Fwd) | Score (Rev) | Lib/DB   |
|-------------|---------|----|-------------|-------------|-------------|----------|
|             |         |    | 62.85       |             |             | NIST17.L |

Observed Spectrum

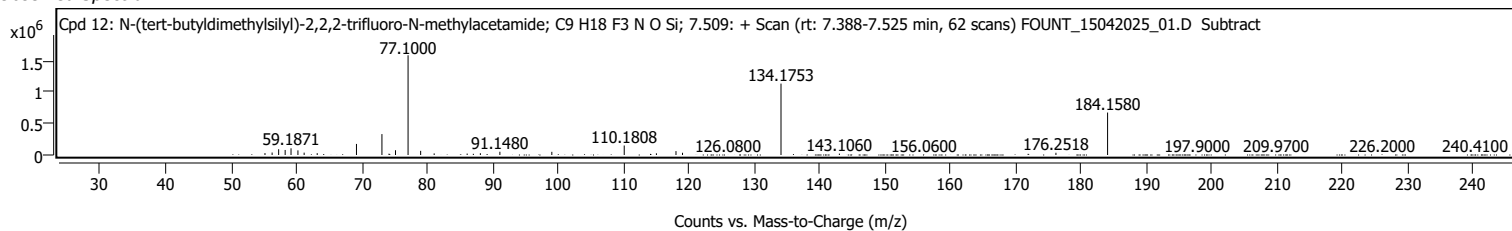

Library Spectrum

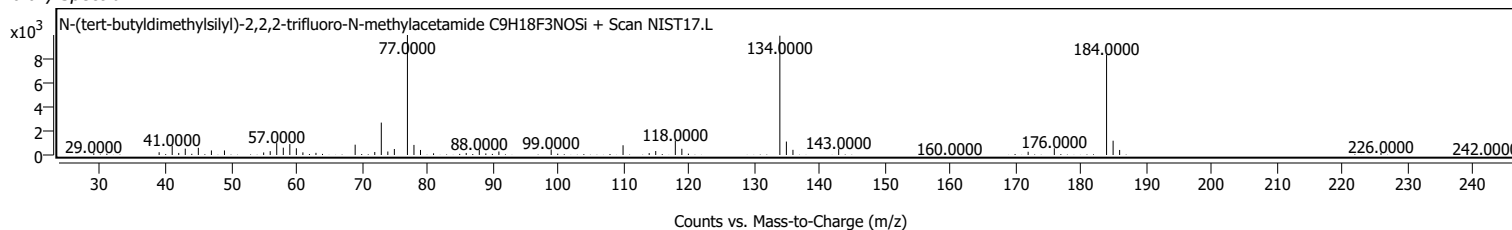

**Cpd. 13: N-(tert-butyl(dimethylsilyl))-2,2,2-trifluoro-N-methylacetamide**

| Name                                                            | Formula      | RT    | CAS          | ID Source | Score | Algorithm | Lib/DB   |
|-----------------------------------------------------------------|--------------|-------|--------------|-----------|-------|-----------|----------|
| N-(tert-butyl(dimethylsilyl))-2,2,2-trifluoro-N-methylacetamide | C9H18F3NO Si | 7.537 | 1000458-45-7 | LibSearch | 62.84 | Integrate | NIST17.L |

Compound ID Table

| Name                                                            | Formula     | ID Source | RT    | CAS          | Score |
|-----------------------------------------------------------------|-------------|-----------|-------|--------------|-------|
| N-(tert-butyl(dimethylsilyl))-2,2,2-trifluoro-N-methylacetamide | C9H18F3NOSi | LibSearch | 7.537 | 1000458-45-7 | 62.84 |
| N-(tert-butyl(dimethylsilyl))trifluoroacetamide                 | C8H16F3NOSi | LibSearch | 7.537 | 83170-48-3   | 60.57 |
| N-Methyltrifluoroacetamide, TMS derivative                      | C6H12F3NOSi | LibSearch | 7.537 | 24589-78-4   | 36.52 |

Structure



Compound Spectra (overlaid)

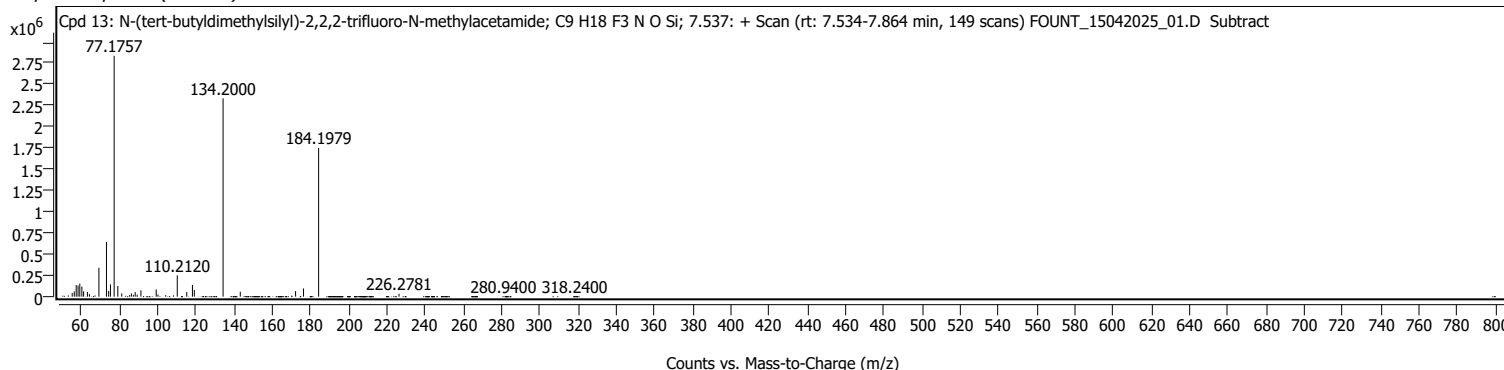

*N*-(*tert*-butyl(dimethylsilyl))-2,2,2-trifluoro-*N*-methylacetamide

| m/z (prec.) | Species | CE | Score (Lib) | Score (Fwd) | Score (Rev) | Lib/DB   |
|-------------|---------|----|-------------|-------------|-------------|----------|
|             |         |    | 62.84       |             |             | NIST17.L |

Library Match Details

| m/z (prec.) | Species | CE | Score (Lib) | Score (Fwd) | Score (Rev) | Lib/DB   |
|-------------|---------|----|-------------|-------------|-------------|----------|
|             |         |    | 62.84       |             |             | NIST17.L |

Observed Spectrum

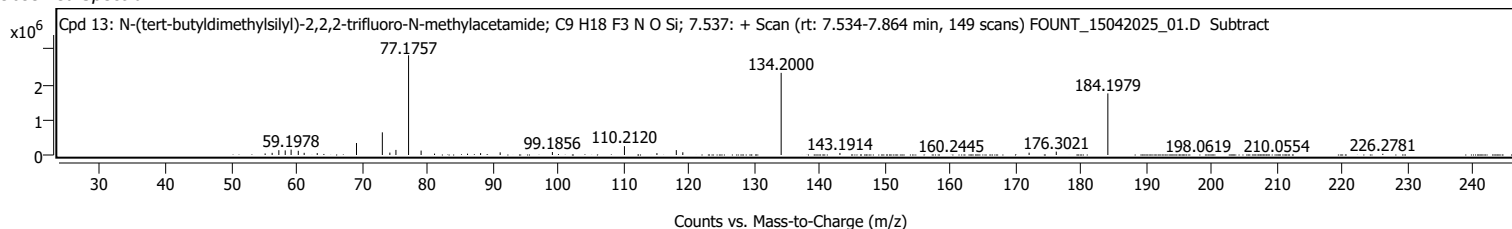

Library Spectrum



**Cpd. 14: 4-(*tert*-Butyl)thiane 1,1-dioxide, (+/-)-**

| Name                                              | Formula  | RT    | CAS         | ID Source | Score | Algorithm | Lib/DB   |
|---------------------------------------------------|----------|-------|-------------|-----------|-------|-----------|----------|
| 4-( <i>tert</i> -Butyl)thiane 1,1-dioxide, (+/-)- | C9H18O2S | 8.076 | 137423-30-4 | LibSearch | 45.89 | Integrate | NIST17.L |

Compound ID Table

| Name                                              | Formula  | ID Source | RT    | CAS         | Score |
|---------------------------------------------------|----------|-----------|-------|-------------|-------|
| 4-( <i>tert</i> -Butyl)thiane 1,1-dioxide, (+/-)- | C9H18O2S | LibSearch | 8.076 | 137423-30-4 | 45.89 |
| Borinic acid, diethyl-, 5-hexynyl ester           | C10H19BO | LibSearch | 8.076 | 62338-11-8  | 43.07 |
| 3-(1,2,3,4-Tetrazol-1-yl)phenol                   | C7H6N4O  | LibSearch | 8.076 | 125620-16-8 | 39.54 |

Structure

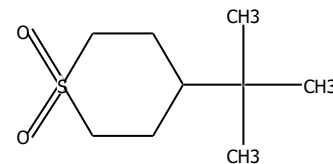

## Compound Spectra (overlaid)

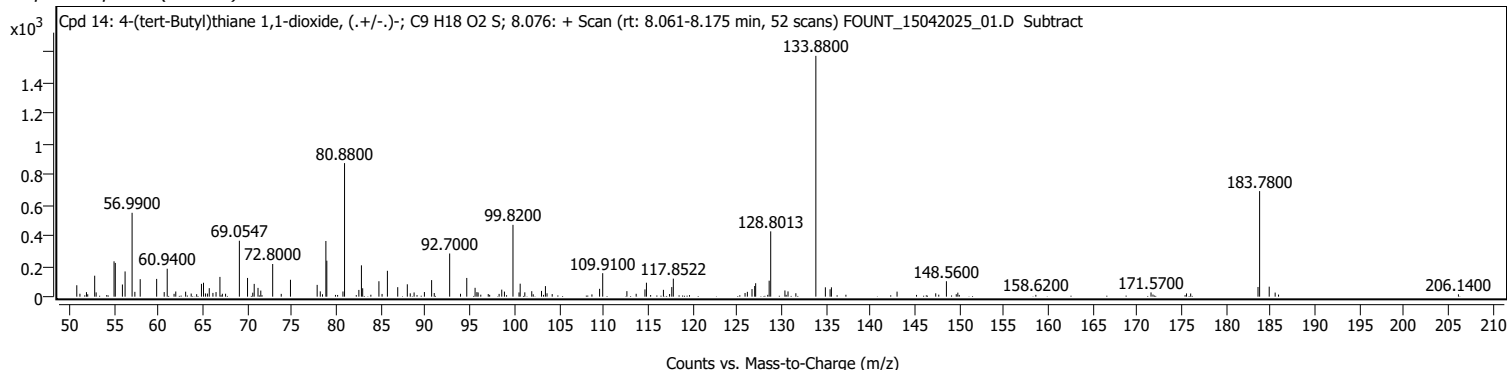

## 4-(tert-Butyl)thiane 1,1-dioxide, (+/-)-

| m/z (prec.) | Species | CE | Score (Lib) | Score (Fwd) | Score (Rev) | Lib/DB   |
|-------------|---------|----|-------------|-------------|-------------|----------|
|             |         |    | 45.89       |             |             | NIST17.L |

## Library Match Details

| m/z (prec.) | Species | CE | Score (Lib) | Score (Fwd) | Score (Rev) | Lib/DB   |
|-------------|---------|----|-------------|-------------|-------------|----------|
|             |         |    | 45.89       |             |             | NIST17.L |

## Observed Spectrum

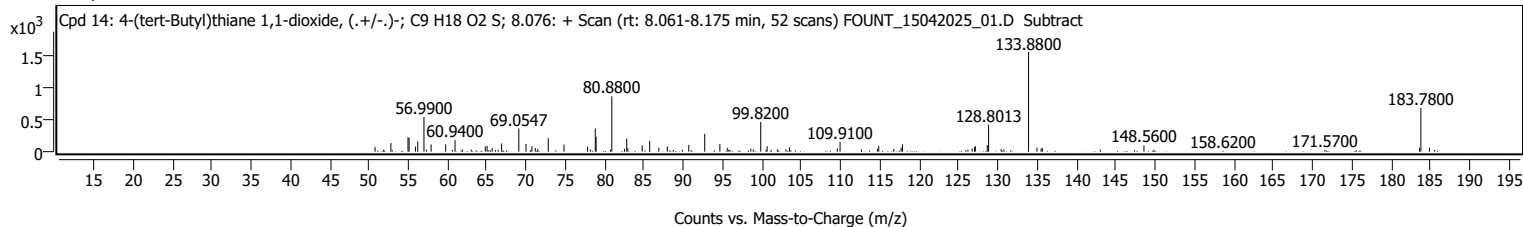

## Library Spectrum

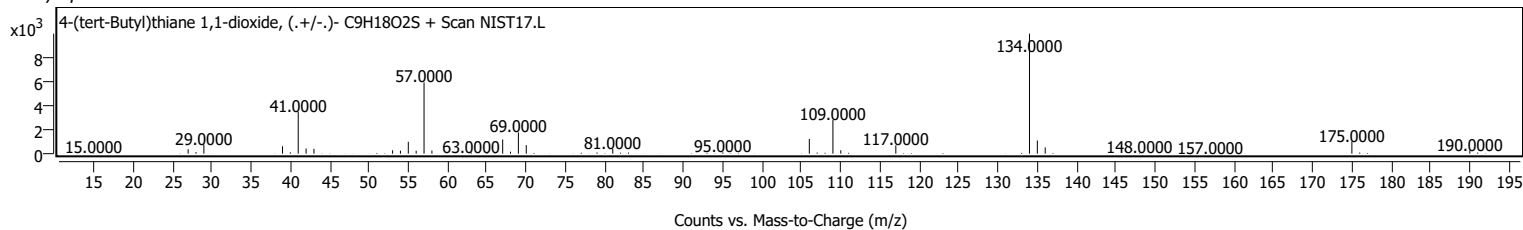

## Cpd. 15: 1-Propanethiol, 3-(diethylboryloxy)-

| Name                                 | Formula  | RT    | CAS          | ID Source | Score | Algorithm | Lib/DB   |
|--------------------------------------|----------|-------|--------------|-----------|-------|-----------|----------|
| 1-Propanethiol, 3-(diethylboryloxy)- | C7H17BOS | 8.214 | 1000161-78-5 | LibSearch | 43.20 | Integrate | NIST17.L |

## Compound ID Table

| Name                                       | Formula  | ID Source | RT    | CAS          | Score |
|--------------------------------------------|----------|-----------|-------|--------------|-------|
| 1-Propanethiol, 3-(diethylboryloxy)-       | C7H17BOS | LibSearch | 8.214 | 1000161-78-5 | 43.20 |
| Propanethiol, 2-(diethylboryloxy)-         | C7H17BOS | LibSearch | 8.214 | 1000163-03-3 | 38.74 |
| Isothiocyanatoacetaldehyde dimethyl acetal | C5H9NO2S | LibSearch | 8.214 | 75052-04-9   | 35.96 |

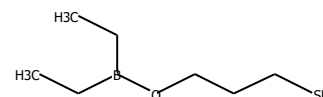

Compound Spectra (overlaid)

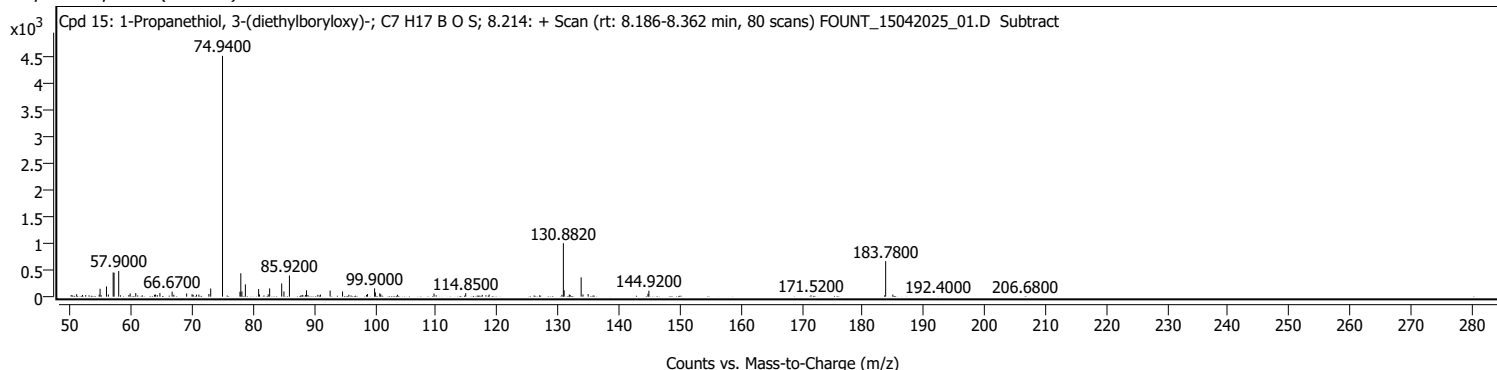

1-Propanethiol, 3-(diethylboryloxy)-

| m/z (prec.) | Species | CE | Score (Lib) | Score (Fwd) | Score (Rev) | Lib/DB   |
|-------------|---------|----|-------------|-------------|-------------|----------|
| 43.20       |         |    |             |             |             | NIST17.L |

Library Match Details

| m/z (prec.) | Species | CE | Score (Lib) | Score (Fwd) | Score (Rev) | Lib/DB   |
|-------------|---------|----|-------------|-------------|-------------|----------|
| 43.20       |         |    |             |             |             | NIST17.L |

Observed Spectrum

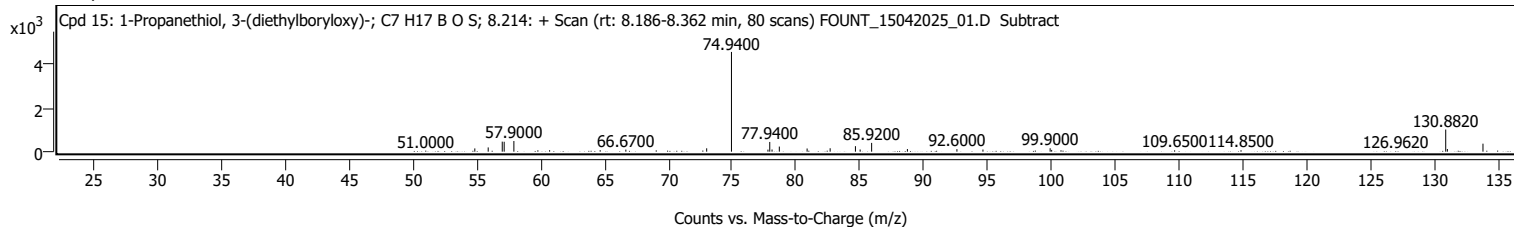

Library Spectrum

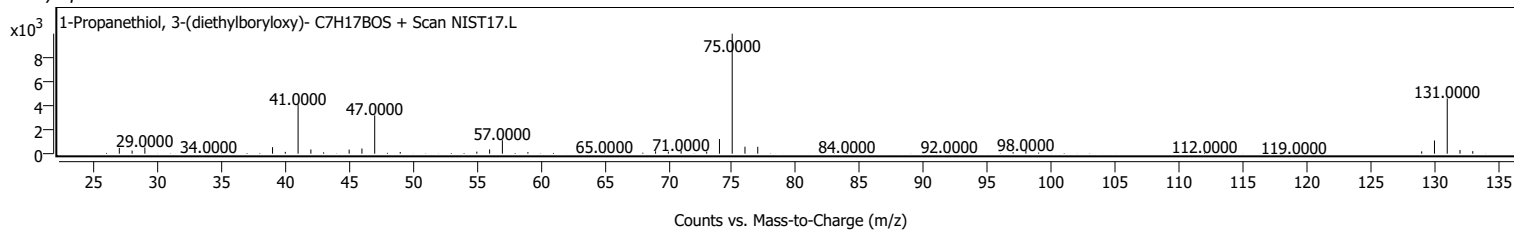

Cpd. 16: N-(tert-butylidimethylsilyl)trifluoroacetamide

| Name                                           | Formula          | RT    | CAS        | ID Source | Score | Algorithm | Lib/DB   |
|------------------------------------------------|------------------|-------|------------|-----------|-------|-----------|----------|
| N-(tert-butylidimethylsilyl)trifluoroacetamide | C8 H16 F3 N O Si | 8.500 | 83170-48-3 | LibSearch | 38.63 | Integrate | NIST17.L |

Compound ID Table

| Name                                           | Formula     | ID Source | RT    | CAS        | Score |
|------------------------------------------------|-------------|-----------|-------|------------|-------|
| N-(tert-butylidimethylsilyl)trifluoroacetamide | C8H16F3NOSi | LibSearch | 8.500 | 83170-48-3 | 38.63 |
| 2-n-Propylthiane, S,S-dioxide                  | C8H16O2S    | LibSearch | 8.500 | 72385-41-2 | 37.13 |
| Methanamine, N-(phenylmethylene)-, N-oxide     | C8H9NO      | LibSearch | 8.500 | 3376-23-6  | 36.02 |

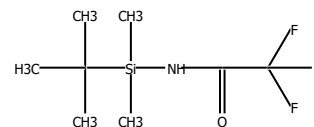

Compound Spectra (overlaid)

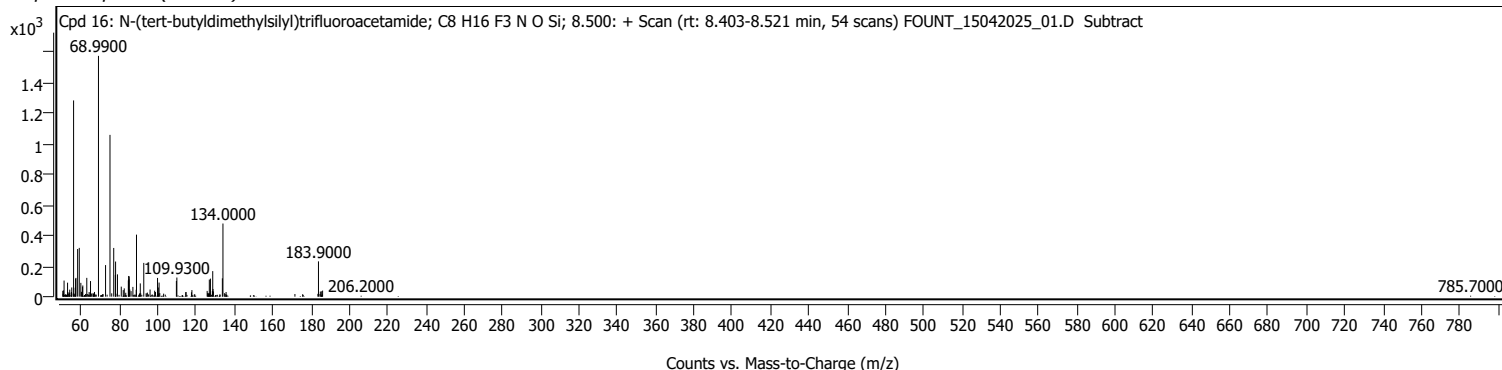

N-(tert-butyl(dimethylsilyl)trifluoroacetamide

| m/z (prec.) | Species | CE | Score (Lib) | Score (Fwd) | Score (Rev) | Lib/DB   |
|-------------|---------|----|-------------|-------------|-------------|----------|
|             |         |    | 38.63       |             |             | NIST17.L |

Library Match Details

| m/z (prec.) | Species | CE | Score (Lib) | Score (Fwd) | Score (Rev) | Lib/DB   |
|-------------|---------|----|-------------|-------------|-------------|----------|
|             |         |    | 38.63       |             |             | NIST17.L |

Observed Spectrum

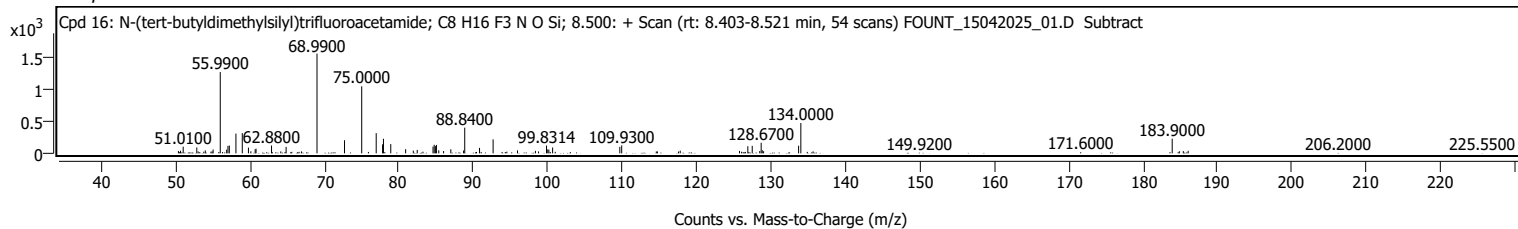

Library Spectrum

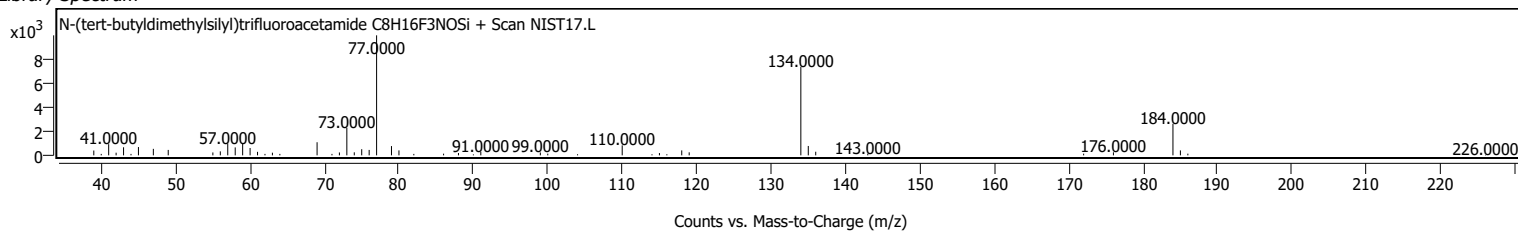

Cpd. 17: 1-Methyl-1-silabenzocyclobutene

| Name                            | Formula   | RT    | CAS         | ID Source | Score | Algorithm | Lib/DB   |
|---------------------------------|-----------|-------|-------------|-----------|-------|-----------|----------|
| 1-Methyl-1-silabenzocyclobutene | C8 H10 Si | 8.549 | 160841-06-5 | LibSearch | 47.88 | Integrate | NIST17.L |

Compound ID Table

| Name                                           | Formula | ID Source | RT    | CAS         | Score |
|------------------------------------------------|---------|-----------|-------|-------------|-------|
| 1-Methyl-1-silabenzocyclobutene                | C8H10Si | LibSearch | 8.549 | 160841-06-5 | 47.88 |
| 3,4-Hexadien-2-ol, 3-isopropenyl-2,5-dimethyl- | C11H18O | LibSearch | 8.549 | 15448-75-6  | 47.09 |
| 6,6-Dimethyl-2-vinylidenebicyclo[3.1.1]heptane | C11H16  | LibSearch | 8.549 | 39021-75-5  | 46.28 |

Structure

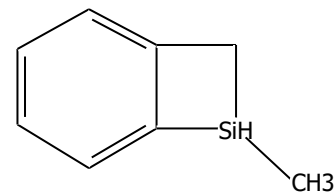

Compound Spectra (overlaid)

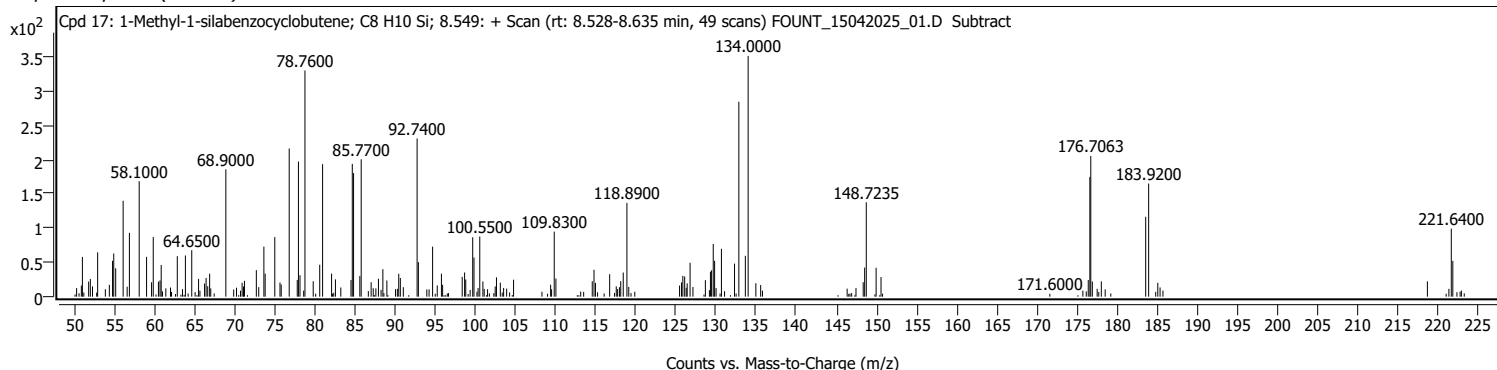

1-Methyl-1-silabenzocyclobutene

| m/z (prec.) | Species | CE | Score (Lib) | Score (Fwd) | Score (Rev) | Lib/DB   |
|-------------|---------|----|-------------|-------------|-------------|----------|
|             |         |    | 47.88       |             |             | NIST17.L |

Library Match Details

| m/z (prec.) | Species | CE | Score (Lib) | Score (Fwd) | Score (Rev) | Lib/DB   |
|-------------|---------|----|-------------|-------------|-------------|----------|
|             |         |    | 47.88       |             |             | NIST17.L |

Observed Spectrum

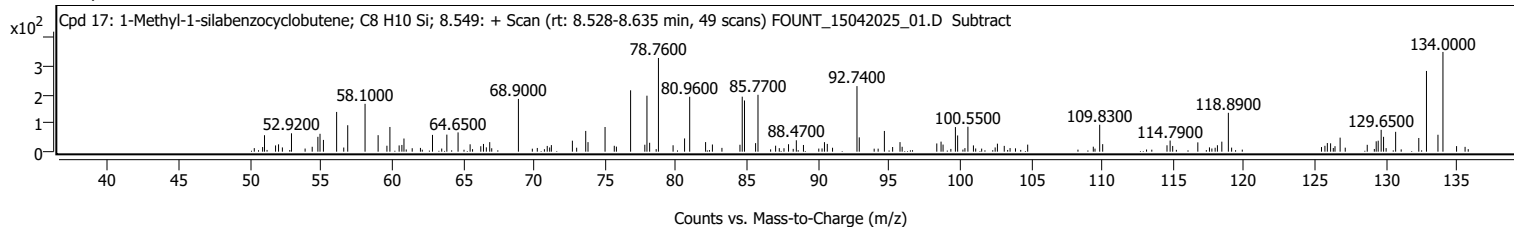

Library Spectrum

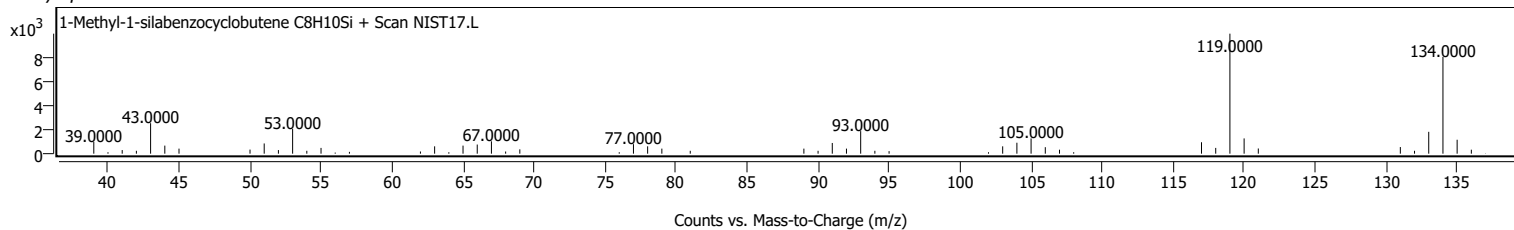

Cpd. 18: o-Methyl S-(2-diethylaminoethyl) methylphosphonothiolate

| Name                                                     | Formula       | RT    | CAS         | ID Source | Score | Algorithm | Lib/DB   |
|----------------------------------------------------------|---------------|-------|-------------|-----------|-------|-----------|----------|
| o-Methyl S-(2-diethylaminoethyl) methylphosphonothiolate | C8H20N O2 P S | 8.653 | 203385-78-8 | LibSearch | 43.22 | Integrate | NIST17.L |

Compound ID Table

| Name                                                     | Formula    | ID Source | RT    | CAS         | Score |
|----------------------------------------------------------|------------|-----------|-------|-------------|-------|
| o-Methyl S-(2-diethylaminoethyl) methylphosphonothiolate | C8H20NO2PS | LibSearch | 8.653 | 203385-78-8 | 43.22 |
| 1,1,2-Trimethyl-1-silacyclobutane                        | C6H14Si    | LibSearch | 8.653 | 30681-90-4  | 38.77 |
| Silane, bis(silylmethyl)-                                | C2H12Si3   | LibSearch | 8.653 | 5637-99-0   | 38.48 |

Structure

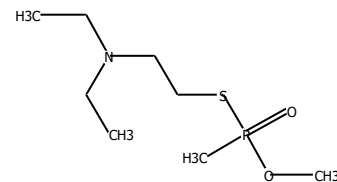

Compound Spectra (overlaid)

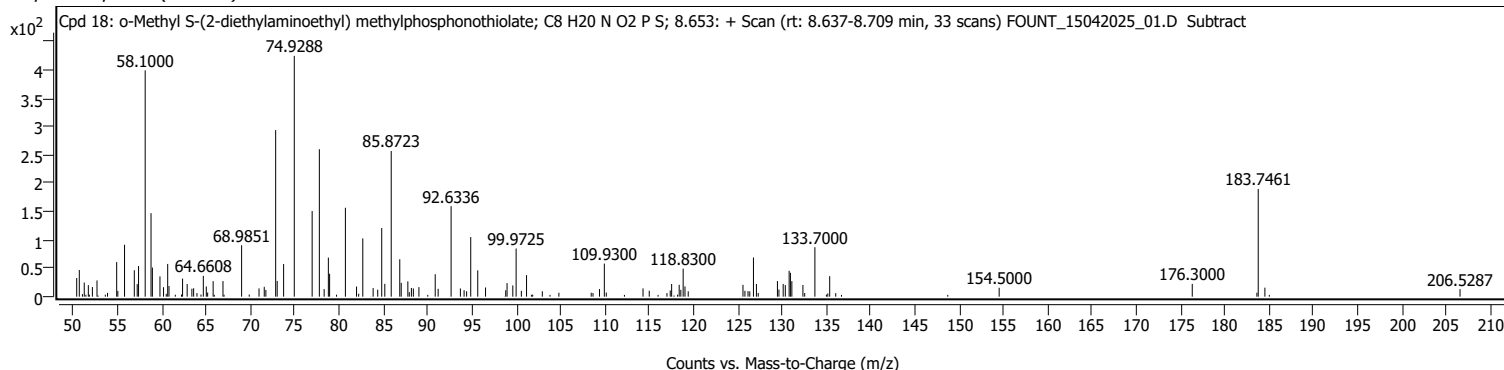

*o*-Methyl S-(2-diethylaminoethyl) methylphosphonothiolate

| m/z (prec.) | Species | CE | Score (Lib) | Score (Fwd) | Score (Rev) | Lib/DB   |
|-------------|---------|----|-------------|-------------|-------------|----------|
|             |         |    | 43.22       |             |             | NIST17.L |

Library Match Details

| m/z (prec.) | Species | CE | Score (Lib) | Score (Fwd) | Score (Rev) | Lib/DB   |
|-------------|---------|----|-------------|-------------|-------------|----------|
|             |         |    | 43.22       |             |             | NIST17.L |

Observed Spectrum

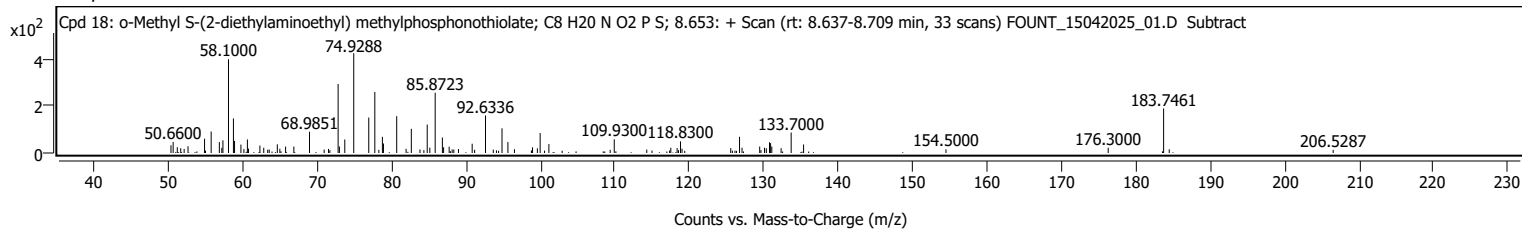

Library Spectrum

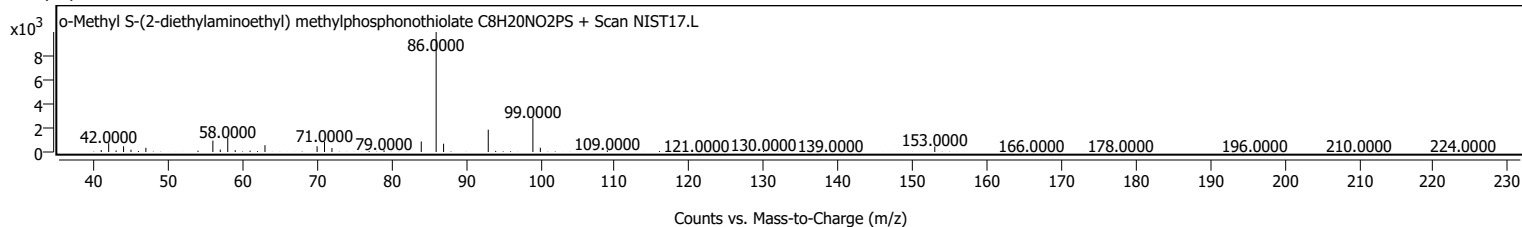

**Cpd. 19: 1-(((Trimethylsilyl)oxy)methyl)-1H-1,2,3-benzotriazole**

| Name                                                   | Formula         | RT    | CAS          | ID Source | Score | Algorithm | Lib/DB   |
|--------------------------------------------------------|-----------------|-------|--------------|-----------|-------|-----------|----------|
| 1-(((Trimethylsilyl)oxy)methyl)-1H-1,2,3-benzotriazole | C10 H15 N3 O Si | 8.813 | 1000297-95-4 | LibSearch | 44.02 | Integrate | NIST17.L |

Compound ID Table

| Name                                                   | Formula       | ID Source | RT    | CAS          | Score |
|--------------------------------------------------------|---------------|-----------|-------|--------------|-------|
| 1-(((Trimethylsilyl)oxy)methyl)-1H-1,2,3-benzotriazole | C10H15N3OSi   | LibSearch | 8.813 | 1000297-95-4 | 44.02 |
| 1H-Benzotriazole, 1-(4-morpholinylmethyl)-             | C11H14N4O     | LibSearch | 8.813 | 5472-71-9    | 37.06 |
| N-Difluorophosphoxy-O-trimethylsilylhydroxylamine      | C3H10F2NO2PSi | LibSearch | 8.813 | 1000306-11-9 | 35.52 |

Structure

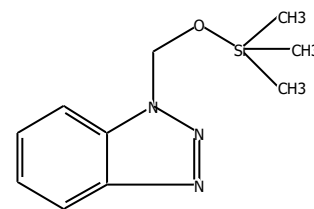

Compound Spectra (overlaid)

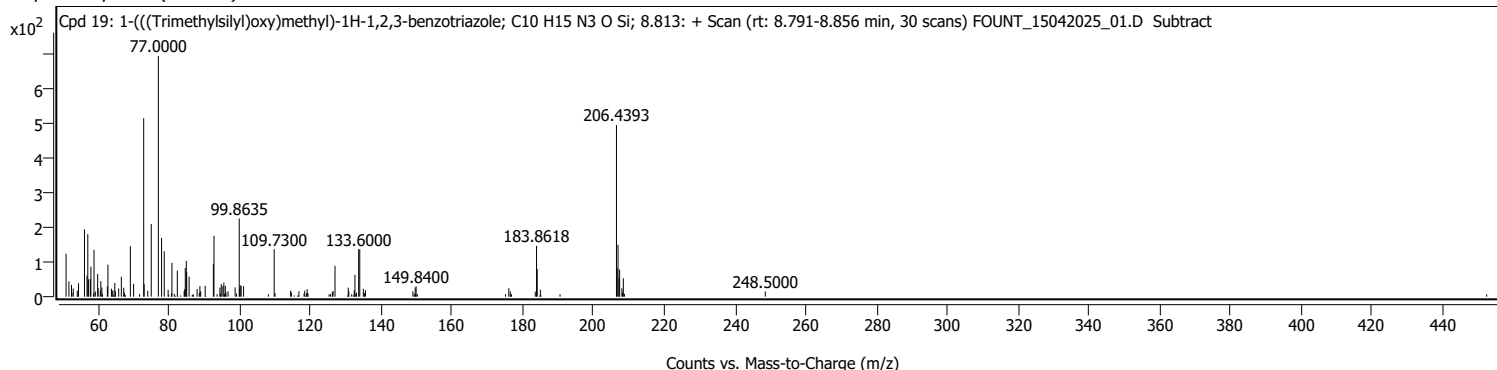

1-  
(((Trimethylsilyloxy)methyl)-1H-1,2,3-benzotriazole

| m/z (prec.) | Species | CE | Score (Lib) | Score (Fwd) | Score (Rev) | Lib/DB   |
|-------------|---------|----|-------------|-------------|-------------|----------|
|             |         |    | 44.02       |             |             | NIST17.L |

Library Match Details

| m/z (prec.) | Species | CE | Score (Lib) | Score (Fwd) | Score (Rev) | Lib/DB   |
|-------------|---------|----|-------------|-------------|-------------|----------|
|             |         |    | 44.02       |             |             | NIST17.L |

Observed Spectrum

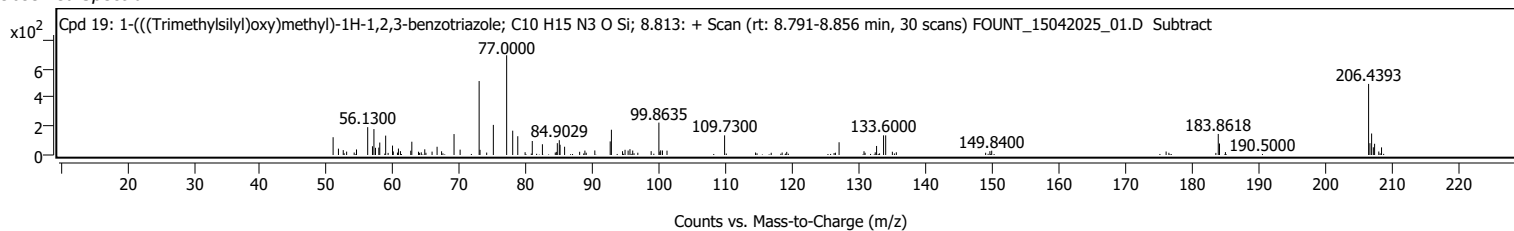

Library Spectrum

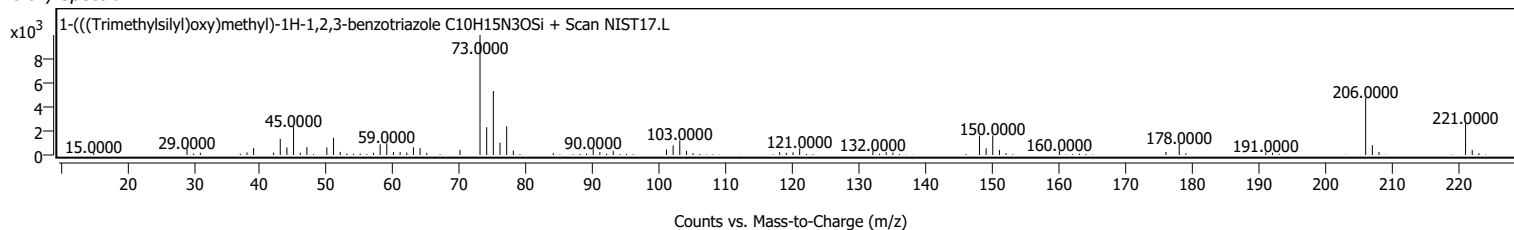

Cpd. 20: Benzamide, 4-fluoro-N-(5H-tetrazol-5-yl)-

| Name                                      | Formula      | RT    | CAS          | ID Source | Score | Algorithm | Lib/DB   |
|-------------------------------------------|--------------|-------|--------------|-----------|-------|-----------|----------|
| Benzamide, 4-fluoro-N-(5H-tetrazol-5-yl)- | C8 H6 F N5 O | 8.904 | 1000262-68-4 | LibSearch | 45.12 | Integrate | NIST17.L |

Compound ID Table

| Name                                            | Formula  | ID Source | RT    | CAS          | Score |
|-------------------------------------------------|----------|-----------|-------|--------------|-------|
| Benzamide, 4-fluoro-N-(5H-tetrazol-5-yl)-       | C8H6FN5O | LibSearch | 8.904 | 1000262-68-4 | 45.12 |
| 4-Fluoro- $\alpha$ -methylbenzyl isothiocyanate | C9H8FNS  | LibSearch | 8.904 | 182565-27-1  | 42.76 |
| 4-Fluoro-N-(1H-tetrazol-5-yl)benzamide          | C8H6FN5O | LibSearch | 8.904 | 1000306-76-6 | 41.03 |

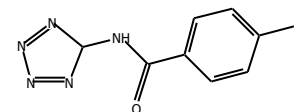

### Compound Spectra (overlaid)

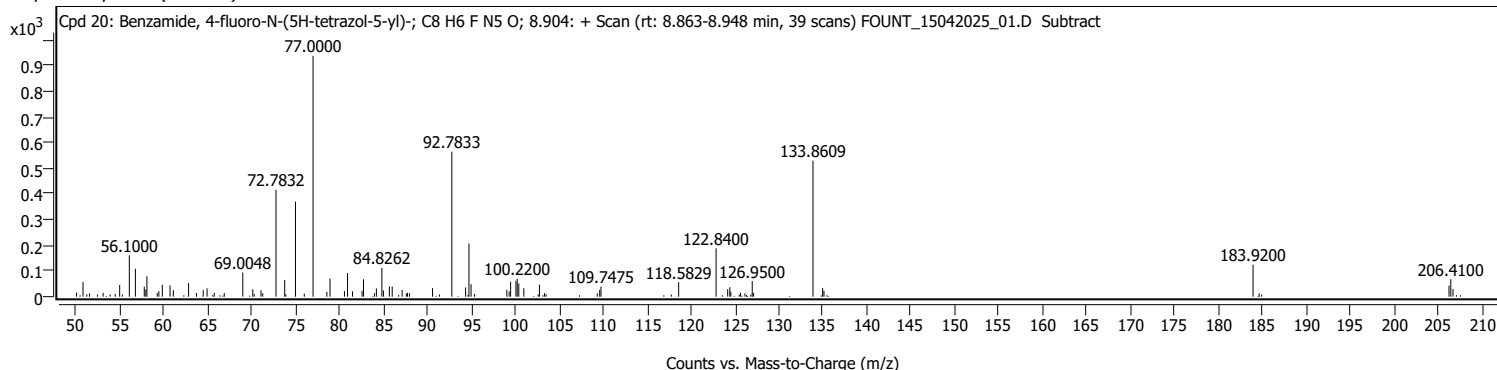

### Benzamide, 4-fluoro-N-(5H-tetrazol-5-yl)-

| m/z (prec.) | Species | CE | Score (Lib) | Score (Fwd) | Score (Rev) | Lib/DB   |
|-------------|---------|----|-------------|-------------|-------------|----------|
|             |         |    | 45.12       |             |             | NIST17.L |

### Library Match Details

| m/z (prec.) | Species | CE | Score (Lib) | Score (Fwd) | Score (Rev) | Lib/DB   |
|-------------|---------|----|-------------|-------------|-------------|----------|
|             |         |    | 45.12       |             |             | NIST17.L |

### Observed Spectrum

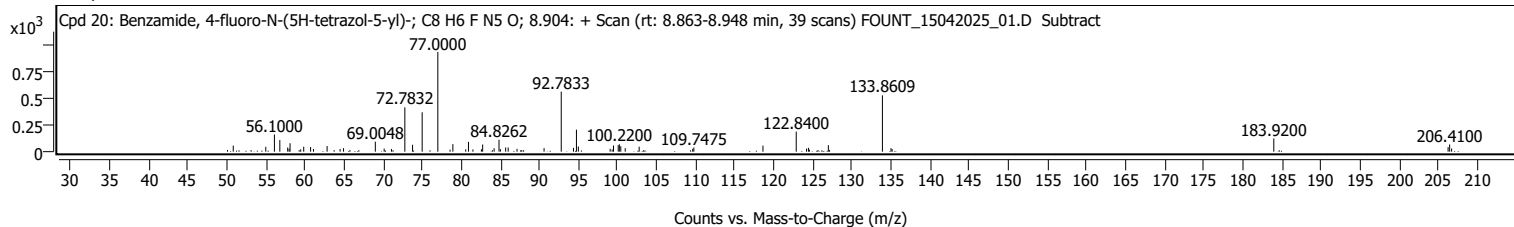

### Library Spectrum

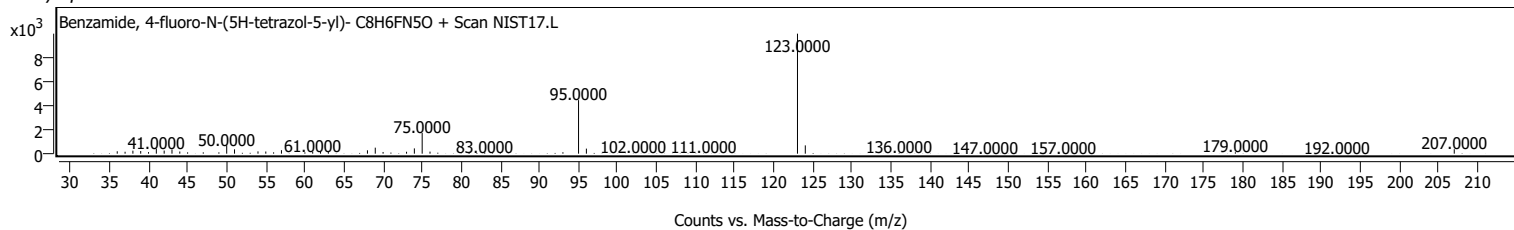

### Cpd. 21: Heptyl ethylphosphonofluoridate

| Name                            | Formula                                           | RT    | CAS         | ID Source | Score | Algorithm | Lib/DB   |
|---------------------------------|---------------------------------------------------|-------|-------------|-----------|-------|-----------|----------|
| Heptyl ethylphosphonofluoridate | C <sub>9</sub> H <sub>20</sub> F O <sub>2</sub> P | 9.135 | 162085-85-0 | LibSearch | 69.18 | Integrate | NIST17.L |

### Compound ID Table

| Name                                         | Formula                                           | ID Source | RT    | CAS         | Score |
|----------------------------------------------|---------------------------------------------------|-----------|-------|-------------|-------|
| Heptyl ethylphosphonofluoridate              | C <sub>9</sub> H <sub>20</sub> FO <sub>2</sub> P  | LibSearch | 9.135 | 162085-85-0 | 69.18 |
| Phosphonofluoridic acid, ethyl-, decyl ester | C <sub>12</sub> H <sub>26</sub> FO <sub>2</sub> P | LibSearch | 9.135 | 333416-08-3 | 66.40 |
| Heptyl ethylphosphonofluoridate              | C <sub>9</sub> H <sub>20</sub> FO <sub>2</sub> P  | LibSearch | 9.135 | 162085-85-0 | 66.34 |

Structure

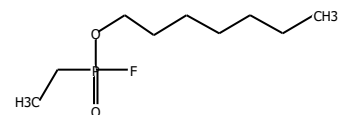

Compound Spectra (overlaid)

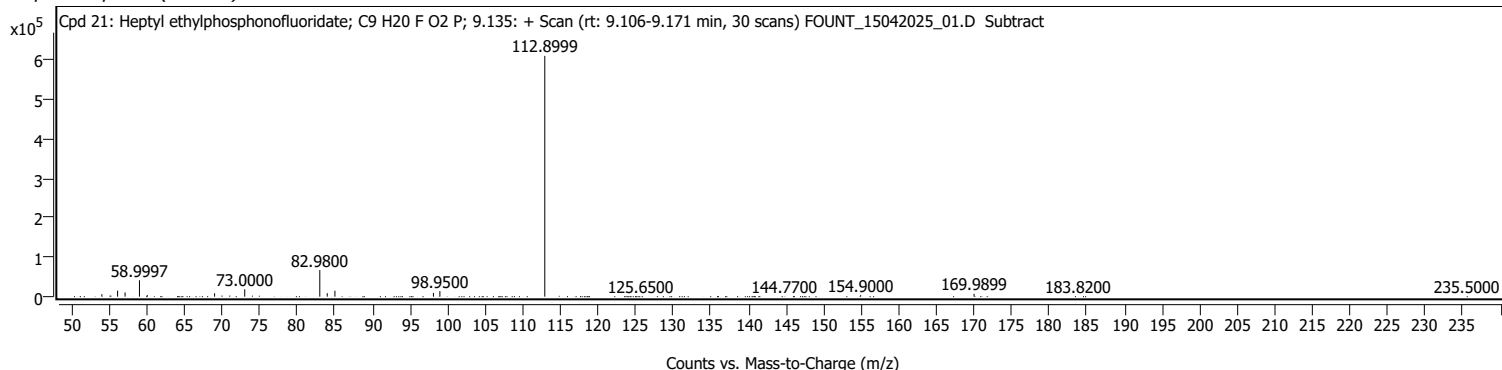

Heptyl ethylphosphonofluoridate

| m/z (prec.) | Species | CE | Score (Lib) | Score (Fwd) | Score (Rev) | Lib/DB   |
|-------------|---------|----|-------------|-------------|-------------|----------|
| 69.18       |         |    | 69.18       |             |             | NIST17.L |

Library Match Details

| m/z (prec.) | Species | CE | Score (Lib) | Score (Fwd) | Score (Rev) | Lib/DB   |
|-------------|---------|----|-------------|-------------|-------------|----------|
| 69.18       |         |    | 69.18       |             |             | NIST17.L |

Observed Spectrum

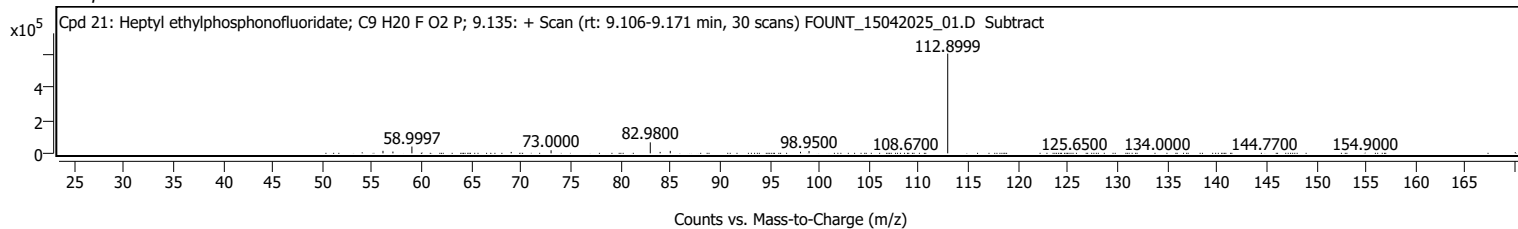

Library Spectrum

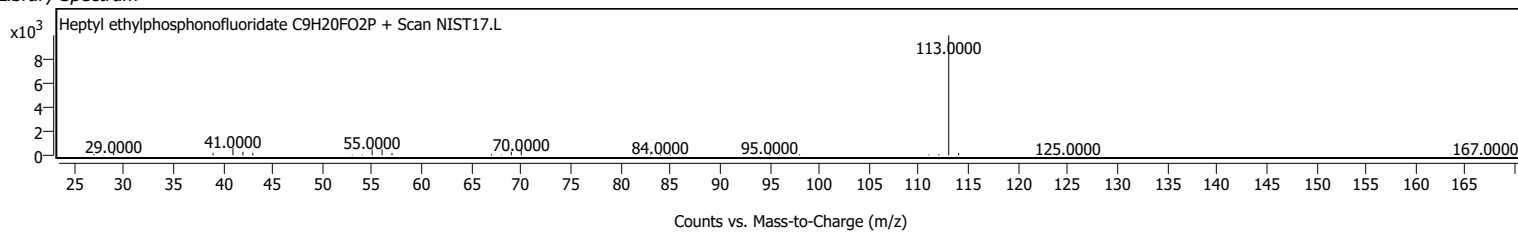

Cpd. 22: 6-Chloro-3-hydroxypyridazine 1-oxide

| Name                                 | Formula        | RT    | CAS        | ID Source | Score | Algorithm | Lib/DB   |
|--------------------------------------|----------------|-------|------------|-----------|-------|-----------|----------|
| 6-Chloro-3-hydroxypyridazine 1-oxide | C4 H3 Cl N2 O2 | 9.304 | 18259-52-4 | LibSearch | 50.26 | Integrate | NIST17.L |

Compound ID Table

| Name                                  | Formula    | ID Source | RT    | CAS        | Score |
|---------------------------------------|------------|-----------|-------|------------|-------|
| 6-Chloro-3-hydroxypyridazine 1-oxide  | C4H3ClN2O2 | LibSearch | 9.304 | 18259-52-4 | 50.26 |
| 5,6-Dimethyl-1,3,4,4-dithiapiridazine | C4H6N2S2   | LibSearch | 9.304 | 21423-60-9 | 46.83 |
| 2-Azabutane, N-amidino-4,4-dimethoxy- | C6H15N3O2  | LibSearch | 9.304 | 52737-41-4 | 44.22 |

Structure

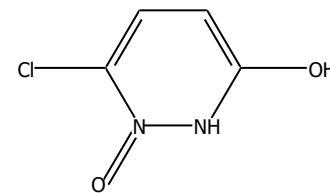

Compound Spectra (overlaid)

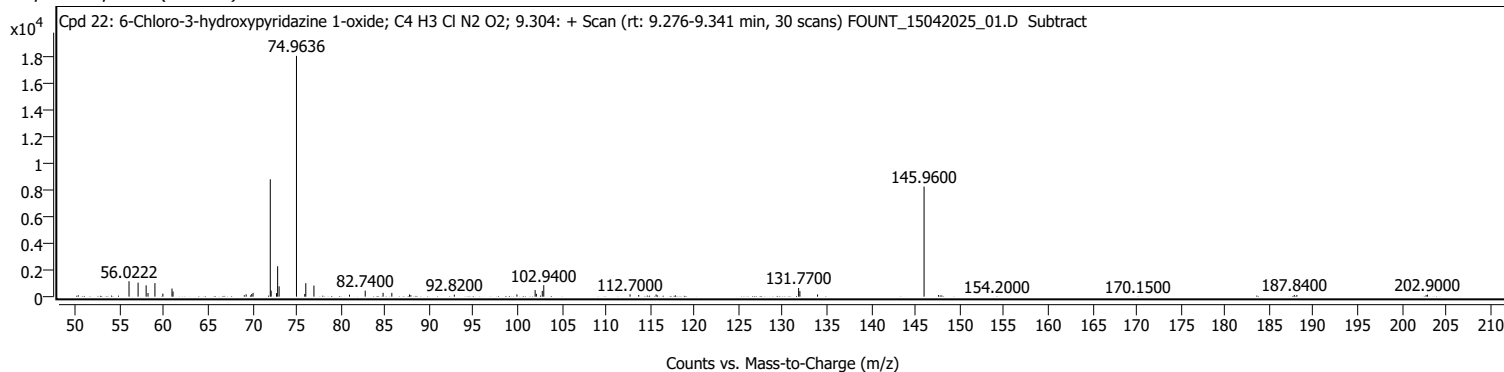

6-Chloro-3-hydroxypyridazine 1-oxide

| m/z (prec.) | Species | CE | Score (Lib) | Score (Fwd) | Score (Rev) | Lib/DB   |
|-------------|---------|----|-------------|-------------|-------------|----------|
|             |         |    | 50.26       |             |             | NIST17.L |

Library Match Details

| m/z (prec.) | Species | CE | Score (Lib) | Score (Fwd) | Score (Rev) | Lib/DB   |
|-------------|---------|----|-------------|-------------|-------------|----------|
|             |         |    | 50.26       |             |             | NIST17.L |

Observed Spectrum

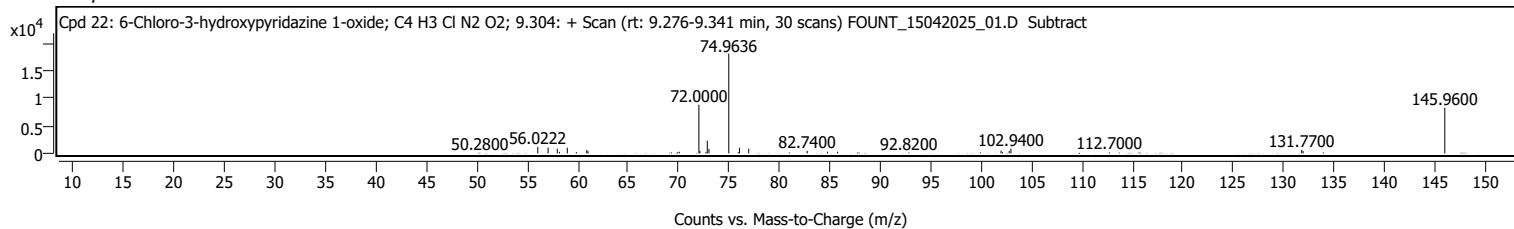

Library Spectrum

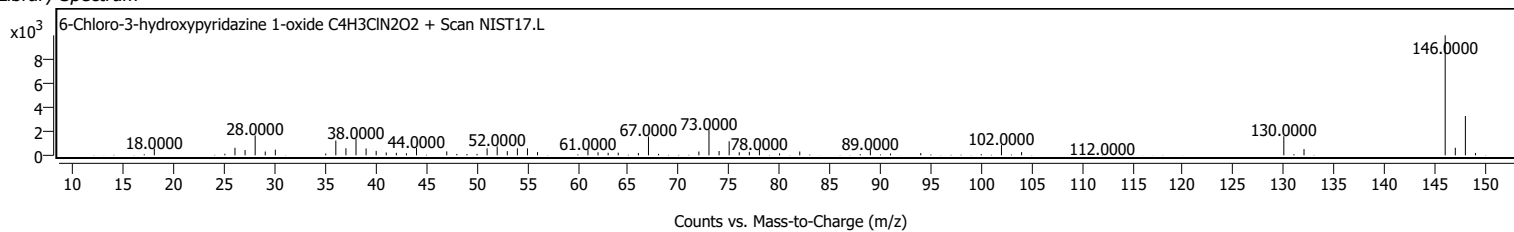

Cpd. 23: Ethylphosphonic acid, fluoroanhydride, 4-methylcyclohexyl ester

| Name                                                            | Formula       | RT    | CAS          | ID Source | Score | Algorithm | Lib/DB   |
|-----------------------------------------------------------------|---------------|-------|--------------|-----------|-------|-----------|----------|
| Ethylphosphonic acid, fluoroanhydride, 4-methylcyclohexyl ester | C9 H18 F O2 P | 9.450 | 1000273-48-4 | LibSearch | 49.10 | Integrate | NIST17.L |

Compound ID Table

| Name                                                            | Formula    | ID Source | RT    | CAS          | Score |
|-----------------------------------------------------------------|------------|-----------|-------|--------------|-------|
| Ethylphosphonic acid, fluoroanhydride, 4-methylcyclohexyl ester | C9H18FO2P  | LibSearch | 9.450 | 1000273-48-4 | 49.10 |
| Phosphonofluoridic acid, ethyl-, nonyl ester                    | C11H24FO2P | LibSearch | 9.450 | 171741-07-4  | 48.39 |
| Phosphonofluoridic acid, ethyl-, decyl ester                    | C12H26FO2P | LibSearch | 9.450 | 333416-08-3  | 45.91 |

Structure

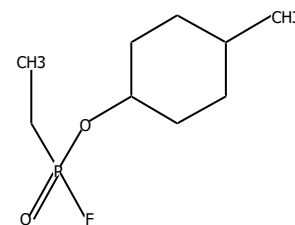

### Compound Spectra (overlaid)

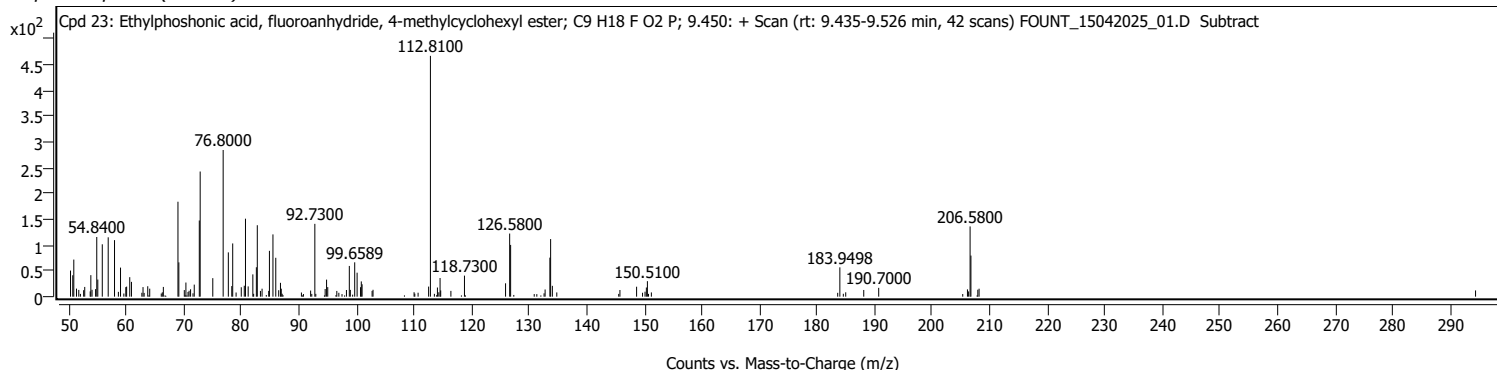

Ethylphosphonic acid, fluoroanhydride, 4-methylcyclohexyl ester

| m/z (prec.) | Species | CE | Score (Lib) | Score (Fwd) | Score (Rev) | Lib/DB   |
|-------------|---------|----|-------------|-------------|-------------|----------|
|             |         |    | 49.10       |             |             | NIST17.L |

### Library Match Details

| m/z (prec.) | Species | CE | Score (Lib) | Score (Fwd) | Score (Rev) | Lib/DB   |
|-------------|---------|----|-------------|-------------|-------------|----------|
|             |         |    | 49.10       |             |             | NIST17.L |

### Observed Spectrum

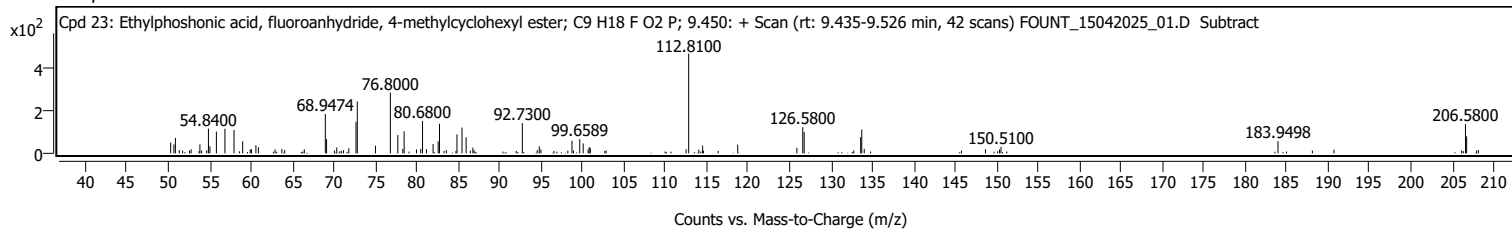

### Library Spectrum

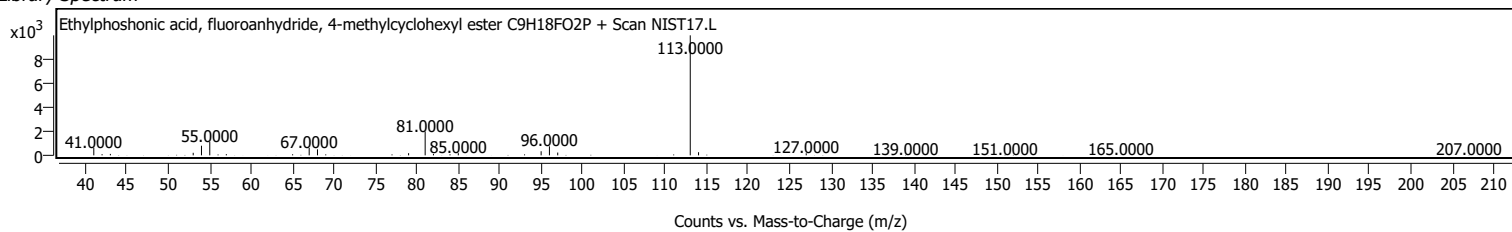

### Cpd. 24: 3-(Methylthio)-1,2,4-triazolo[4,3-b][1,2,4,5]tetrazin-3-amine

| Name                                                          | Formula    | RT    | CAS          | ID Source | Score | Algorithm | Lib/DB   |
|---------------------------------------------------------------|------------|-------|--------------|-----------|-------|-----------|----------|
| 3-(Methylthio)-1,2,4-triazolo[4,3-b][1,2,4,5]tetrazin-3-amine | C4 H5 N7 S | 9.633 | 1000284-75-4 | LibSearch | 35.59 | Integrate | NIST17.L |

### Compound ID Table

| Name                                                          | Formula    | ID Source | RT    | CAS          | Score |
|---------------------------------------------------------------|------------|-----------|-------|--------------|-------|
| 3-(Methylthio)-1,2,4-triazolo[4,3-b][1,2,4,5]tetrazin-3-amine | C4H5N7S    | LibSearch | 9.633 | 1000284-75-4 | 35.59 |
| 3-(2-Methylnaphtho[1,2-d]oxazolium)-1-propanesulfonate        | C15H15NO4S | LibSearch | 9.633 | 71806-08-1   | 34.39 |
| 4-Ethylbenzoic acid, 2-methylphenyl ester                     | C16H16O2   | LibSearch | 9.633 | 1000293-61-2 | 31.13 |

Structure

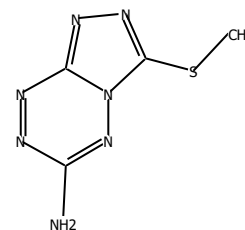

Compound Spectra (overlaid)

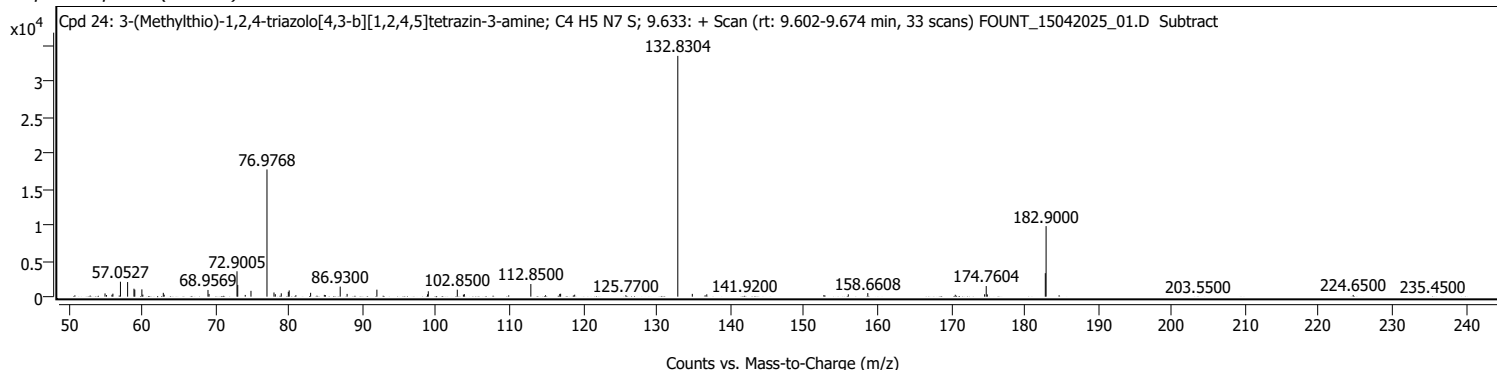

3-(Methylthio)-1,2,4-triazolo[4,3-b][1,2,4,5]tetrazin-3-amine

| m/z (prec.) | Species | CE | Score (Lib) | Score (Fwd) | Score (Rev) | Lib/DB   |
|-------------|---------|----|-------------|-------------|-------------|----------|
|             |         |    | 35.59       |             |             | NIST17.L |

Library Match Details

| m/z (prec.) | Species | CE | Score (Lib) | Score (Fwd) | Score (Rev) | Lib/DB   |
|-------------|---------|----|-------------|-------------|-------------|----------|
|             |         |    | 35.59       |             |             | NIST17.L |

Observed Spectrum

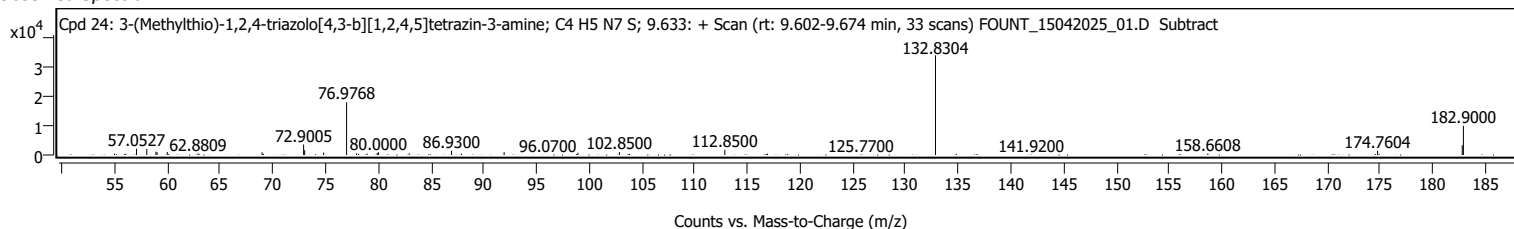

Library Spectrum

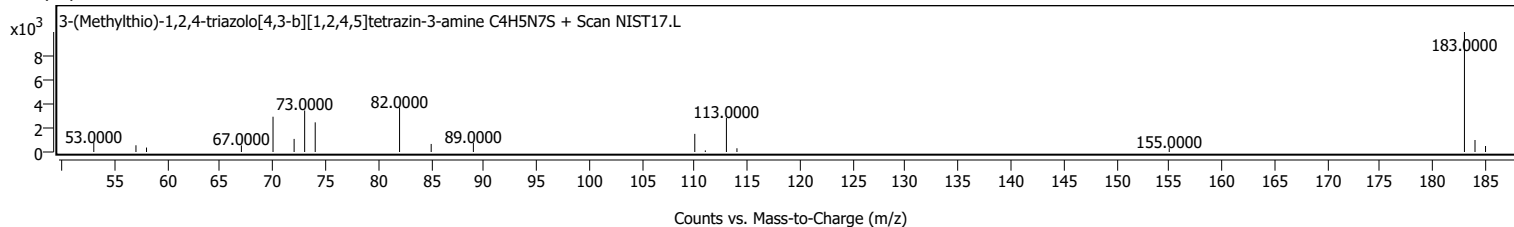

Cpd. 25: Benzene, 2-isocyano-1,3-dimethyl-

| Name                              | Formula | RT    | CAS       | ID Source | Score | Algorithm | Lib/DB   |
|-----------------------------------|---------|-------|-----------|-----------|-------|-----------|----------|
| Benzene, 2-isocyano-1,3-dimethyl- | C9H9N   | 9.753 | 2769-71-3 | LibSearch | 38.03 | Integrate | NIST17.L |

Compound ID Table

| Name                              | Formula   | ID Source | RT    | CAS       | Score |
|-----------------------------------|-----------|-----------|-------|-----------|-------|
| Benzene, 2-isocyano-1,3-dimethyl- | C9H9N     | LibSearch | 9.753 | 2769-71-3 | 38.03 |
| 4-Chloropyridazine 1-oxide        | C4H3ClN2O | LibSearch | 9.753 | 7217-74-5 | 37.75 |
| 3-Chloropyridazine 1-oxide        | C4H3ClN2O | LibSearch | 9.753 | 7217-73-4 | 34.89 |

Structure

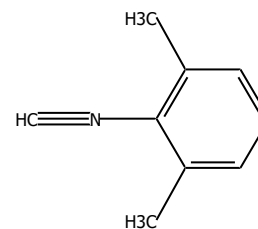

Compound Spectra (overlaid)

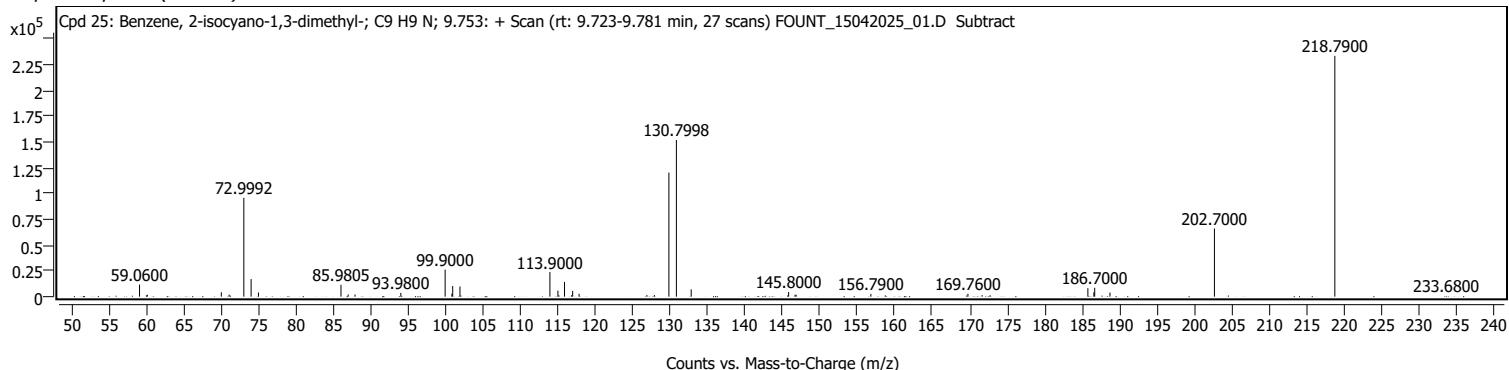

Benzene, 2-isocyano-1,3-dimethyl-

| m/z (prec.) | Species | CE | Score (Lib) | Score (Fwd) | Score (Rev) | Lib/DB   |
|-------------|---------|----|-------------|-------------|-------------|----------|
|             |         |    | 38.03       |             |             | NIST17.L |

Library Match Details

| m/z (prec.) | Species | CE | Score (Lib) | Score (Fwd) | Score (Rev) | Lib/DB   |
|-------------|---------|----|-------------|-------------|-------------|----------|
|             |         |    | 38.03       |             |             | NIST17.L |

Observed Spectrum

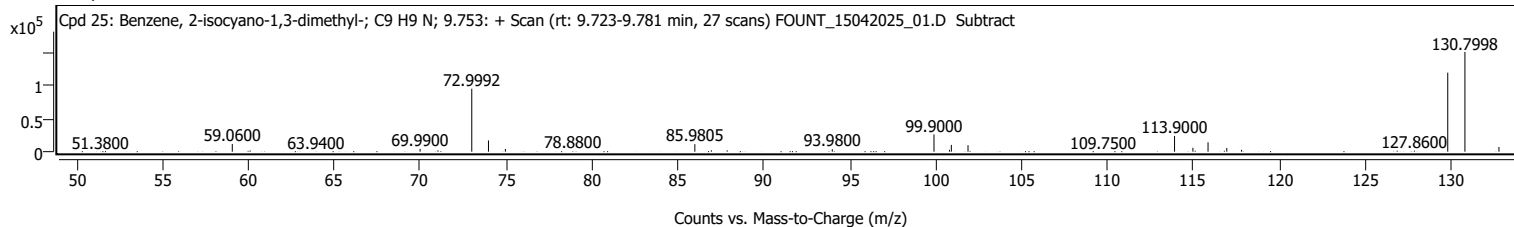

Library Spectrum

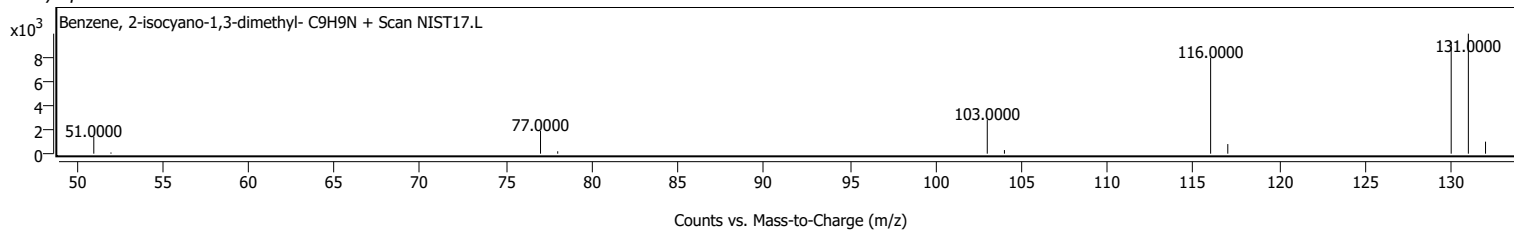

Cpd. 26: Boric acid, 3TMS derivative

| Name                        | Formula                                                         | RT    | CAS       | ID Source | Score | Algorithm | Lib/DB   |
|-----------------------------|-----------------------------------------------------------------|-------|-----------|-----------|-------|-----------|----------|
| Boric acid, 3TMS derivative | C <sub>9</sub> H <sub>27</sub> B O <sub>3</sub> Si <sub>3</sub> | 9.946 | 4325-85-3 | LibSearch | 83.44 | Integrate | NIST17.L |

Compound ID Table

| Name                        | Formula                                                        | ID Source | RT    | CAS       | Score |
|-----------------------------|----------------------------------------------------------------|-----------|-------|-----------|-------|
| Boric acid, 3TMS derivative | C <sub>9</sub> H <sub>27</sub> BO <sub>3</sub> Si <sub>3</sub> | LibSearch | 9.946 | 4325-85-3 | 83.44 |
| Boric acid, 3TMS derivative | C <sub>9</sub> H <sub>27</sub> BO <sub>3</sub> Si <sub>3</sub> | LibSearch | 9.946 | 4325-85-3 | 82.50 |
| Boric acid, 3TMS derivative | C <sub>9</sub> H <sub>27</sub> BO <sub>3</sub> Si <sub>3</sub> | LibSearch | 9.946 | 4325-85-3 | 81.45 |

Structure

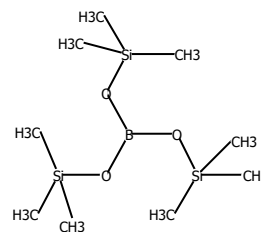

Compound Spectra (overlaid)

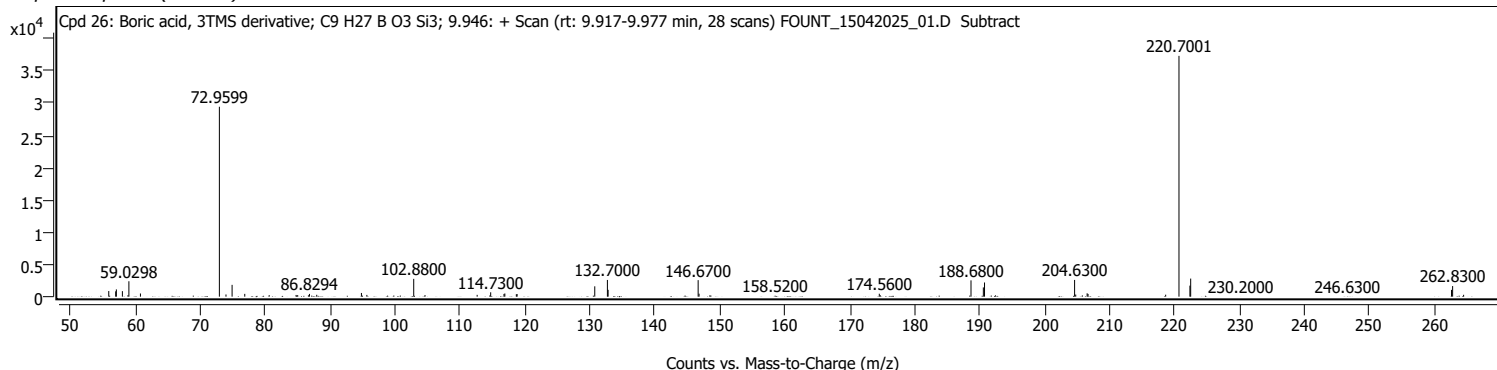

Boric acid, 3TMS derivative

| m/z (prec.) | Species | CE | Score (Lib) | Score (Fwd) | Score (Rev) | Lib/DB   |
|-------------|---------|----|-------------|-------------|-------------|----------|
| 83.44       |         |    |             |             |             | NIST17.L |

Library Match Details

| m/z (prec.) | Species | CE | Score (Lib) | Score (Fwd) | Score (Rev) | Lib/DB   |
|-------------|---------|----|-------------|-------------|-------------|----------|
| 83.44       |         |    |             |             |             | NIST17.L |

Observed Spectrum

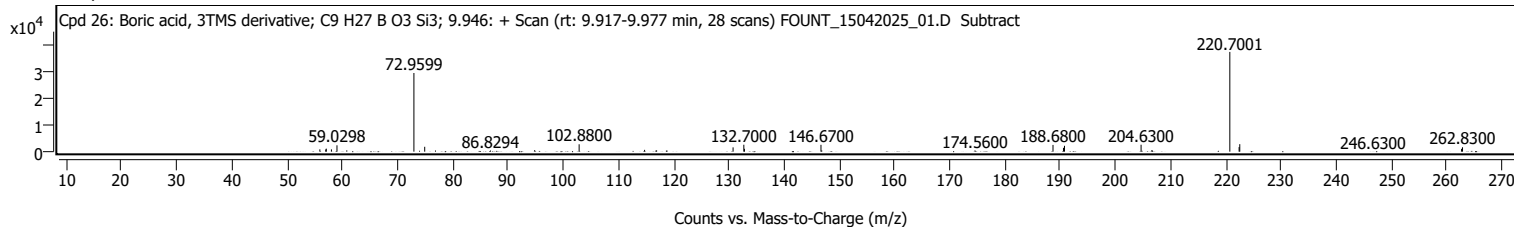

Library Spectrum

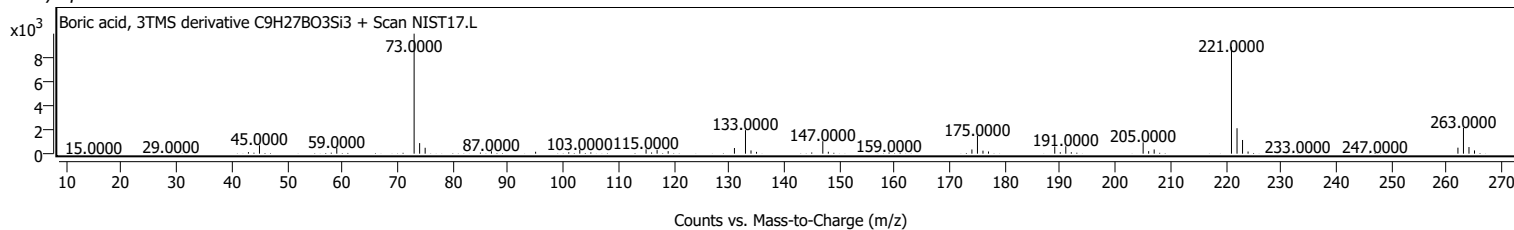

Cpd. 27: Ethyleneglycol-n-butylboronate

| Name                           | Formula     | RT     | CAS        | ID Source | Score | Algorithm | Lib/DB   |
|--------------------------------|-------------|--------|------------|-----------|-------|-----------|----------|
| Ethyleneglycol-n-butylboronate | C6 H13 B O2 | 10.259 | 10173-39-4 | LibSearch | 42.56 | Integrate | NIST17.L |

Compound ID Table

| Name                                         | Formula    | ID Source | RT     | CAS          | Score |
|----------------------------------------------|------------|-----------|--------|--------------|-------|
| Ethyleneglycol-n-butylboronate               | C6H13BO2   | LibSearch | 10.259 | 10173-39-4   | 42.56 |
| 3-Methylpentyl ethylphosphonofluoridate      | C8H18FO2P  | LibSearch | 10.259 | 1000298-39-1 | 37.67 |
| Phosphonofluoridic acid, ethyl-, octyl ester | C10H22FO2P | LibSearch | 10.259 | 333416-07-2  | 37.28 |

Structure

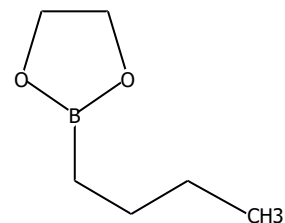

Compound Spectra (overlaid)

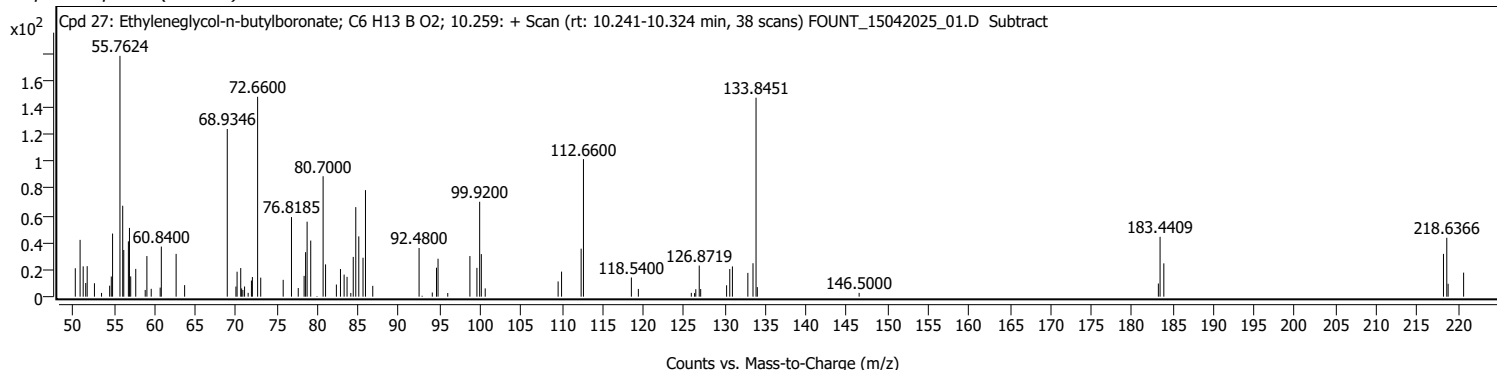

Ethyleneglycol-n-butylboronate

| m/z (prec.) | Species | CE | Score (Lib) | Score (Fwd) | Score (Rev) | Lib/DB   |
|-------------|---------|----|-------------|-------------|-------------|----------|
|             |         |    | 42.56       |             |             | NIST17.L |

Library Match Details

| m/z (prec.) | Species | CE | Score (Lib) | Score (Fwd) | Score (Rev) | Lib/DB   |
|-------------|---------|----|-------------|-------------|-------------|----------|
|             |         |    | 42.56       |             |             | NIST17.L |

Observed Spectrum

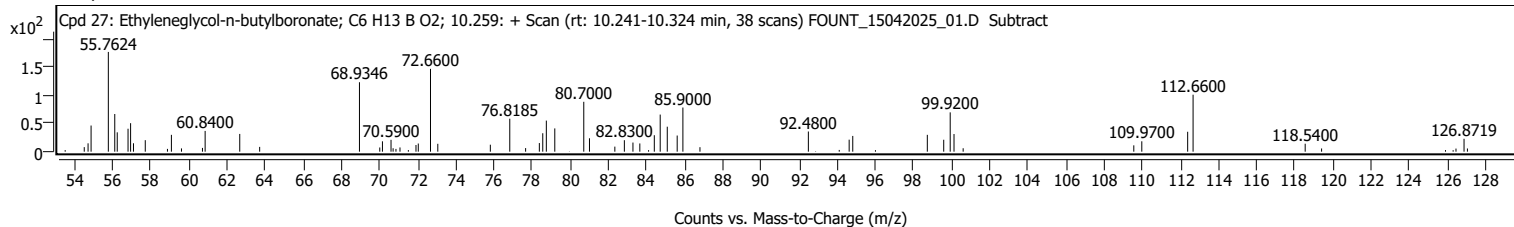

Library Spectrum

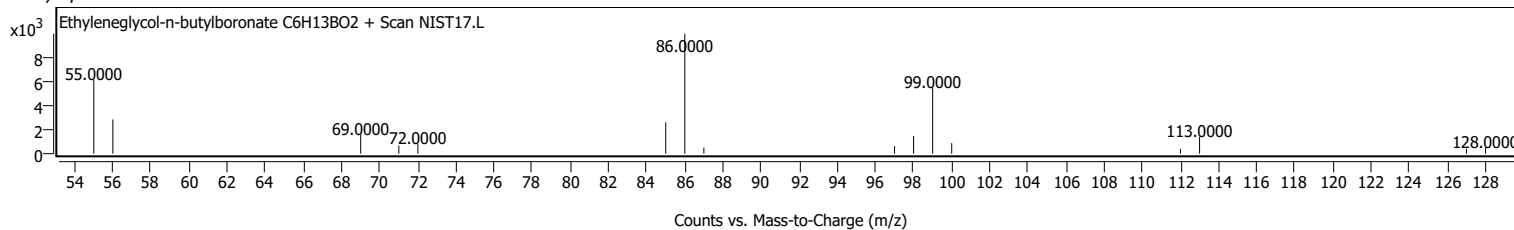

Cpd. 28: Silanamine, N-phenyl-

| Name                  | Formula | RT     | CAS       | ID Source | Score | Algorithm | Lib/DB   |
|-----------------------|---------|--------|-----------|-----------|-------|-----------|----------|
| Silanamine, N-phenyl- | C6H9NSi | 10.390 | 5578-85-8 | LibSearch | 40.38 | Integrate | NIST17.L |

Compound ID Table

| Name                        | Formula | ID Source | RT     | CAS        | Score |
|-----------------------------|---------|-----------|--------|------------|-------|
| Silanamine, N-phenyl-       | C6H9NSi | LibSearch | 10.390 | 5578-85-8  | 40.38 |
| Arsine                      | AsH3    | LibSearch | 10.390 | 7784-42-1  | 39.77 |
| 1H,1H,2H-Perfluoro-1-octene | C8H3F13 | LibSearch | 10.390 | 25291-17-2 | 37.53 |

Structure

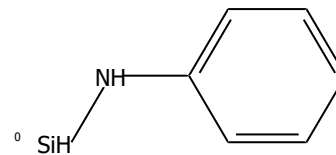

Compound Spectra (overlaid)

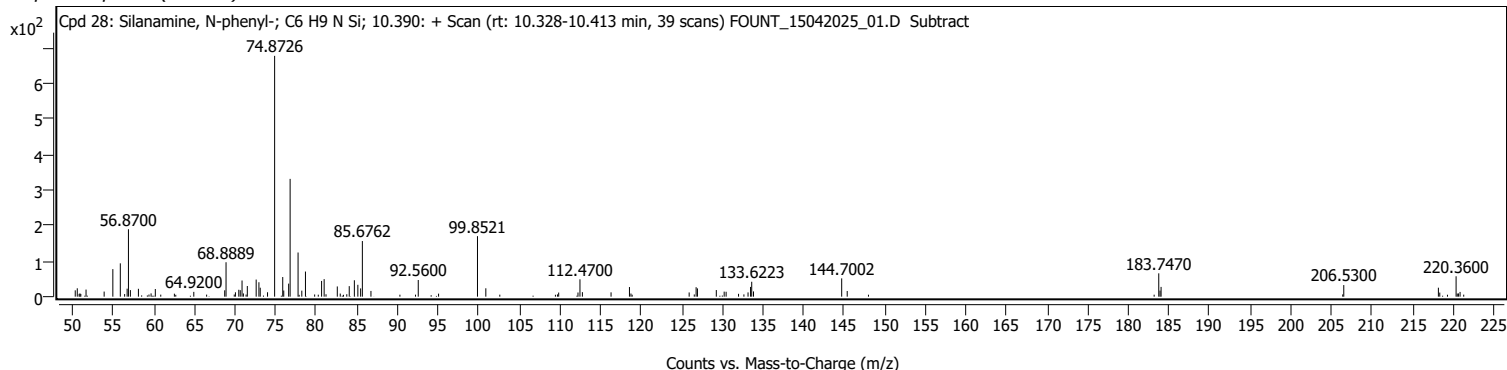

Silanamine, N-phenyl-

| m/z (prec.) | Species | CE | Score (Lib) | Score (Fwd) | Score (Rev) | Lib/DB   |
|-------------|---------|----|-------------|-------------|-------------|----------|
| 40.38       |         |    |             |             |             | NIST17.L |

Library Match Details

| m/z (prec.) | Species | CE | Score (Lib) | Score (Fwd) | Score (Rev) | Lib/DB   |
|-------------|---------|----|-------------|-------------|-------------|----------|
| 40.38       |         |    |             |             |             | NIST17.L |

Observed Spectrum

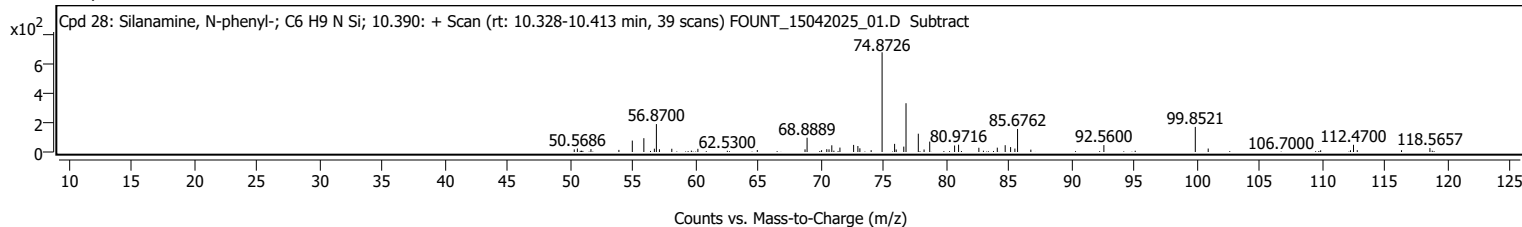

Library Spectrum

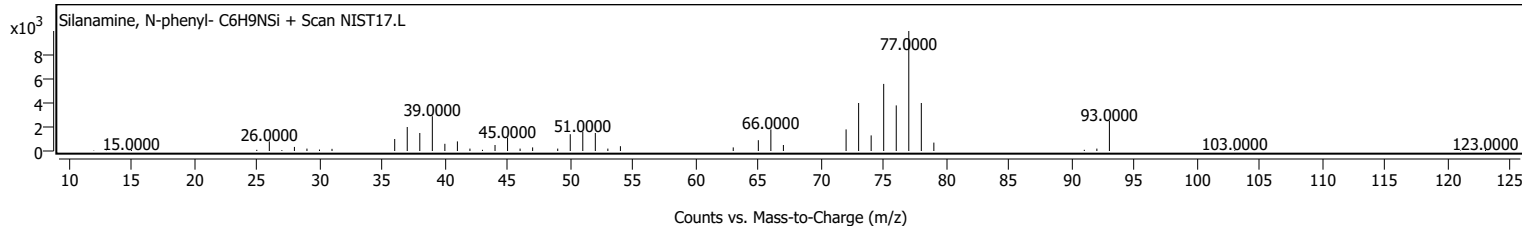

Cpd. 29: 1-Oxa-2-borata-4-azoniacyclohexan-6-one, 5-(ethoxycarbonyl)-4,4-dimethyl-2,2-bis(trifluoromethyl)-

| Name                                                                                               | Formula         | RT     | CAS          | ID Source | Score | Algorithm | Lib/DB   |
|----------------------------------------------------------------------------------------------------|-----------------|--------|--------------|-----------|-------|-----------|----------|
| 1-Oxa-2-borata-4-azoniacyclohexan-6-one, 5-(ethoxycarbonyl)-4,4-dimethyl-2,2-bis(trifluoromethyl)- | C10H14B F6 N O4 | 10.673 | 1000162-17-3 | LibSearch | 49.68 | Integrate | NIST17.L |

Compound ID Table

| Name                                                                                               | Formula      | ID Source | RT     | CAS          | Score |
|----------------------------------------------------------------------------------------------------|--------------|-----------|--------|--------------|-------|
| 1-Oxa-2-borata-4-azoniacyclohexan-6-one, 5-(ethoxycarbonyl)-4,4-dimethyl-2,2-bis(trifluoromethyl)- | C10H14BF6NO4 | LibSearch | 10.673 | 1000162-17-3 | 49.68 |
| Tris(trimethylsilyl)amine                                                                          | C9H27NSi3    | LibSearch | 10.673 | 1586-73-8    | 45.59 |
| 4-Chloropyridazine 1-oxide                                                                         | C4H3ClN2O    | LibSearch | 10.673 | 7217-74-5    | 38.63 |

Structure

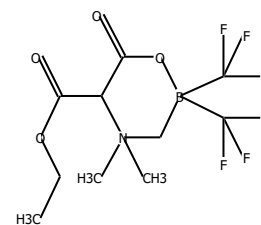

## Compound Spectra (overlaid)

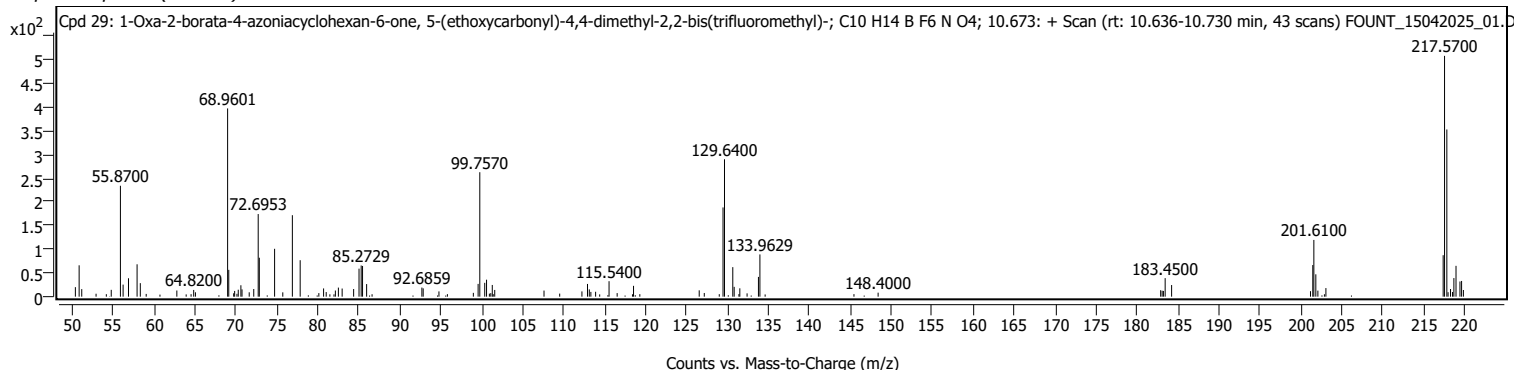

1-Oxa-2-borata-4-azoniacyclohexan-6-one, 5-(ethoxycarbonyl)-4,4-dimethyl-2,2-bis(trifluoromethyl)-

| m/z (prec.) | Species | CE | Score (Lib) | Score (Fwd) | Score (Rev) | Lib/DB   |
|-------------|---------|----|-------------|-------------|-------------|----------|
|             |         |    | 49.68       |             |             | NIST17.L |

## Library Match Details

| m/z (prec.) | Species | CE | Score (Lib) | Score (Fwd) | Score (Rev) | Lib/DB   |
|-------------|---------|----|-------------|-------------|-------------|----------|
|             |         |    | 49.68       |             |             | NIST17.L |

## Observed Spectrum

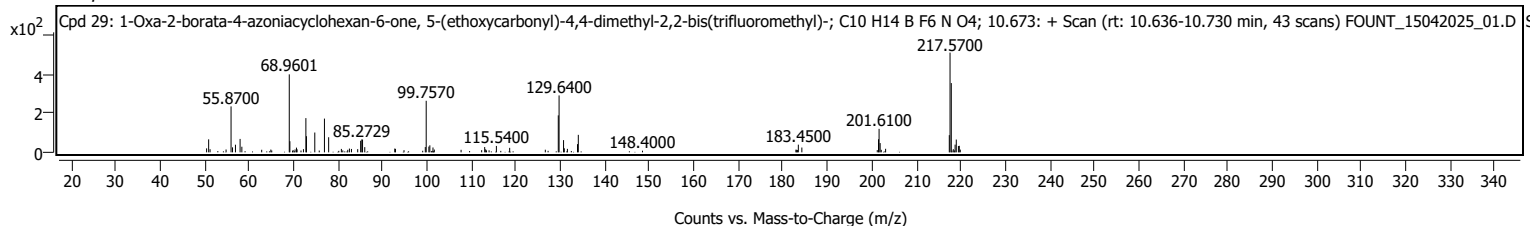

## Library Spectrum

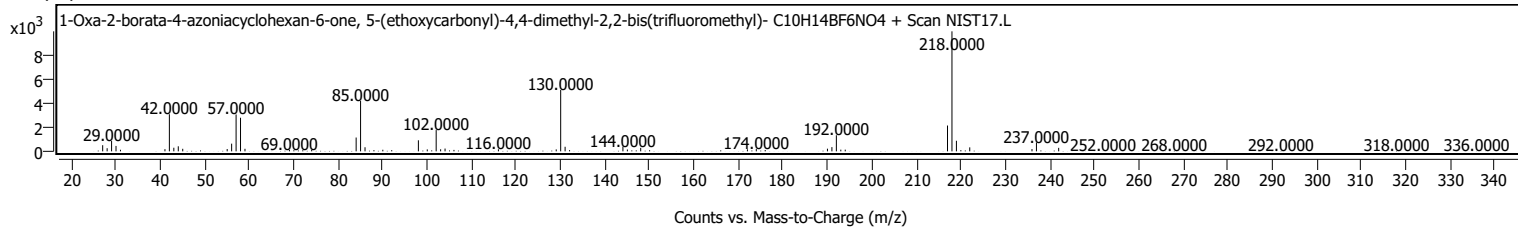

## Cpd. 30: Bis(trimethylsilyl) methylboronate

| Name                               | Formula       | RT     | CAS          | ID Source | Score | Algorithm | Lib/DB   |
|------------------------------------|---------------|--------|--------------|-----------|-------|-----------|----------|
| Bis(trimethylsilyl) methylboronate | C7H21B O2 Si2 | 10.937 | 1000376-32-7 | LibSearch | 71.79 | Integrate | NIST17.L |

## Compound ID Table

| Name                                                        | Formula     | ID Source | RT     | CAS          | Score |
|-------------------------------------------------------------|-------------|-----------|--------|--------------|-------|
| Bis(trimethylsilyl) methylboronate                          | C7H21BO2Si2 | LibSearch | 10.937 | 1000376-32-7 | 71.79 |
| Disiloxane, 1,3-bis(1,1-dimethylethyl)-1,1,3,3-tetramethyl- | C12H30OSi2  | LibSearch | 10.937 | 67875-55-2   | 62.56 |
| Disiloxane, 1,3-bis(1,1-dimethylethyl)-1,1,3,3-tetramethyl- | C12H30OSi2  | LibSearch | 10.937 | 67875-55-2   | 62.56 |

Structure

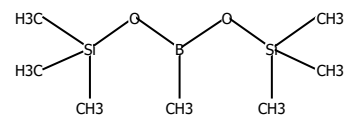

Compound Spectra (overlaid)

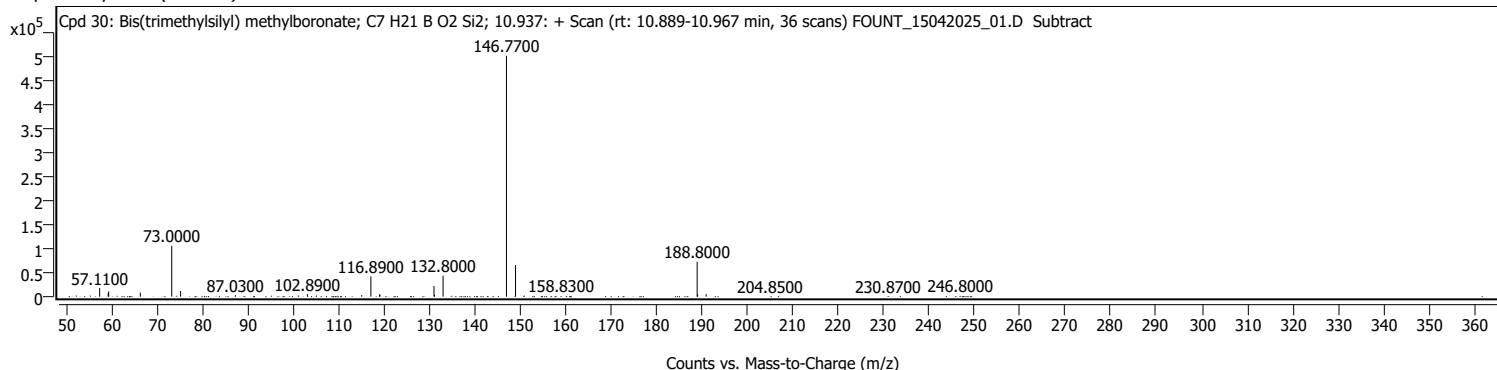

Bis(trimethylsilyl) methylboronate

| m/z (prec.) | Species | CE | Score (Lib) | Score (Fwd) | Score (Rev) | Lib/DB   |
|-------------|---------|----|-------------|-------------|-------------|----------|
| 71.79       |         |    | 71.79       |             |             | NIST17.L |

Library Match Details

| m/z (prec.) | Species | CE | Score (Lib) | Score (Fwd) | Score (Rev) | Lib/DB   |
|-------------|---------|----|-------------|-------------|-------------|----------|
| 71.79       |         |    | 71.79       |             |             | NIST17.L |

Observed Spectrum

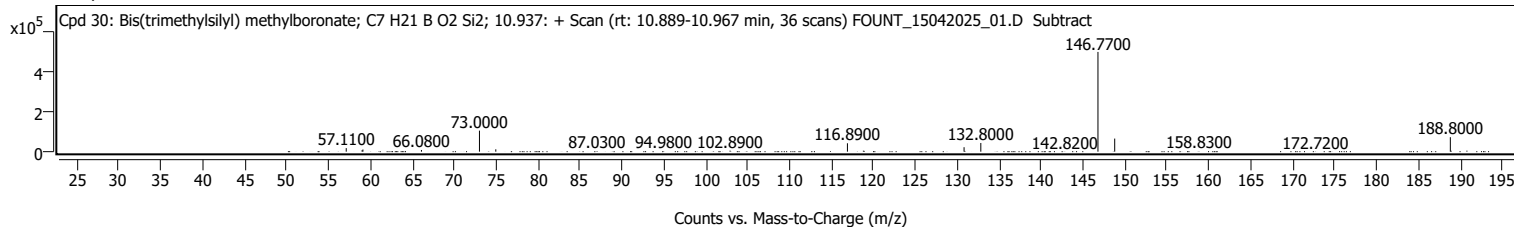

Library Spectrum

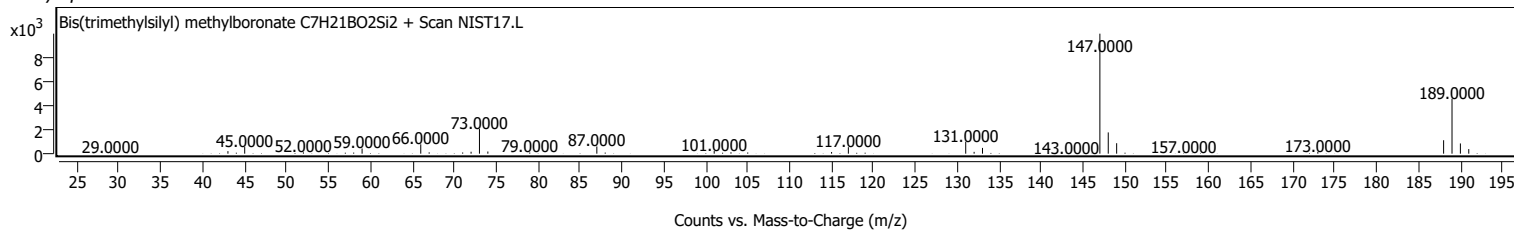

Cpd. 31: Bis(trimethylsilyl) methylboronate

| Name                               | Formula       | RT     | CAS          | ID Source | Score | Algorithm | Lib/DB   |
|------------------------------------|---------------|--------|--------------|-----------|-------|-----------|----------|
| Bis(trimethylsilyl) methylboronate | C7H21B O2 Si2 | 11.213 | 1000376-32-7 | LibSearch | 59.44 | Integrate | NIST17.L |

Compound ID Table

| Name                               | Formula      | ID Source | RT     | CAS          | Score |
|------------------------------------|--------------|-----------|--------|--------------|-------|
| Bis(trimethylsilyl) methylboronate | C7H21BO2Si2  | LibSearch | 11.213 | 1000376-32-7 | 59.44 |
| Butylboronic acid, 2TMS derivative | C10H27BO2Si2 | LibSearch | 11.213 | 67003-47-8   | 58.54 |
| Disiloxane, pentamethyl-           | C5H16OSi2    | LibSearch | 11.213 | 1438-82-0    | 55.04 |

Structure



Compound Spectra (overlaid)

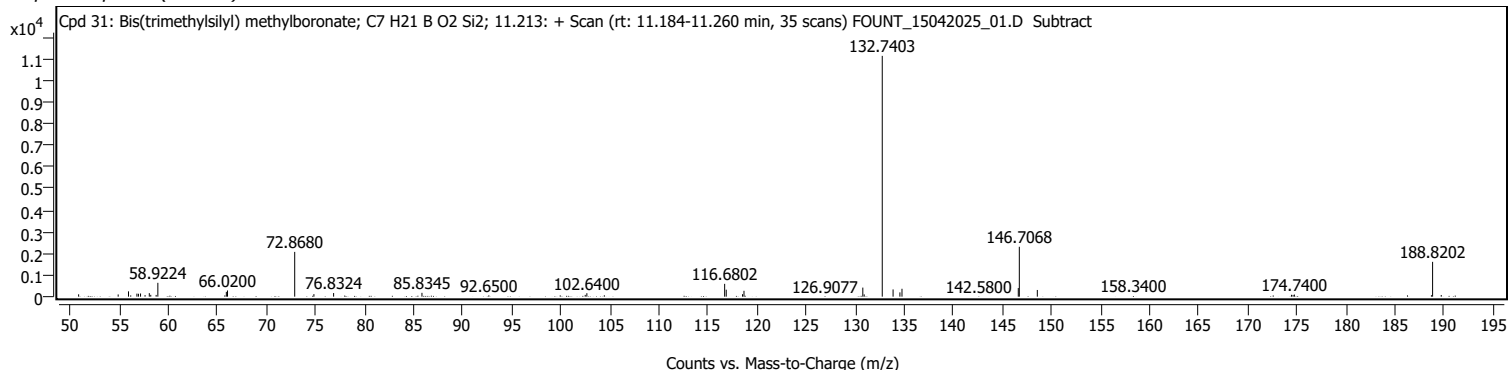

Bis(trimethylsilyl) methylboronate

| m/z (prec.) | Species | CE | Score (Lib) | Score (Fwd) | Score (Rev) | Lib/DB   |
|-------------|---------|----|-------------|-------------|-------------|----------|
|             |         |    | 59.44       |             |             | NIST17.L |

Library Match Details

| m/z (prec.) | Species | CE | Score (Lib) | Score (Fwd) | Score (Rev) | Lib/DB   |
|-------------|---------|----|-------------|-------------|-------------|----------|
|             |         |    | 59.44       |             |             | NIST17.L |

Observed Spectrum

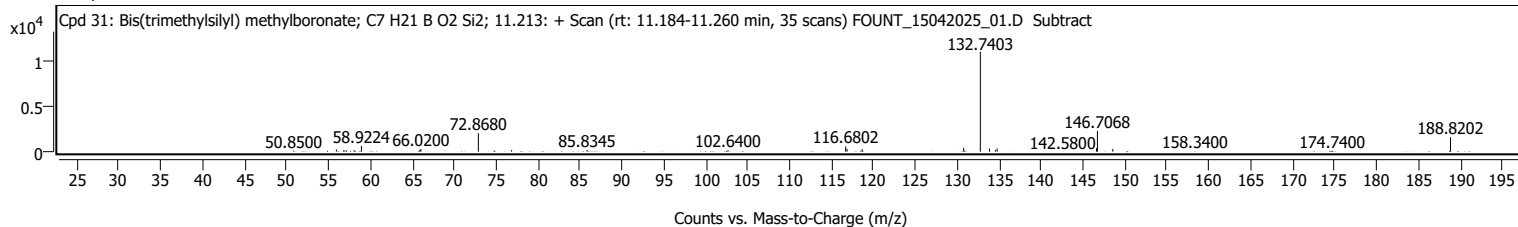

Library Spectrum

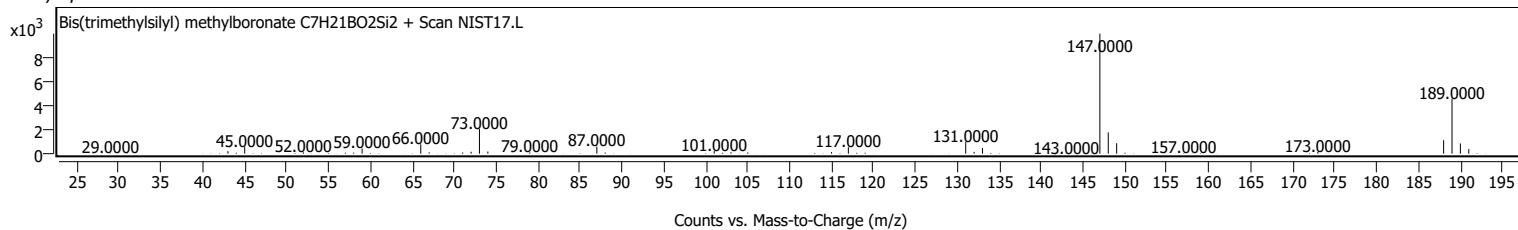

Cpd. 32: Sulfur tetrafluoride oxide

| Name                       | Formula | RT     | CAS        | ID Source | Score | Algorithm | Lib/DB   |
|----------------------------|---------|--------|------------|-----------|-------|-----------|----------|
| Sulfur tetrafluoride oxide | F4 O S  | 12.057 | 13709-54-1 | LibSearch | 54.82 | Integrate | NIST17.L |

Compound ID Table

| Name                                                               | Formula    | ID Source | RT     | CAS        | Score |
|--------------------------------------------------------------------|------------|-----------|--------|------------|-------|
| Sulfur tetrafluoride oxide                                         | F4O S      | LibSearch | 12.057 | 13709-54-1 | 54.82 |
| 9-Borabicyclo[3.3.1]nonane, 9-(benzoyloxy)-                        | C15H19BO2  | LibSearch | 12.057 | 65212-33-1 | 49.13 |
| 1,3,4-Oxadiazolium, 5-hydroxy-2,3-diphenyl-, hydroxide, inner salt | C14H10N2O2 | LibSearch | 12.057 | 24660-41-1 | 46.71 |

Structure

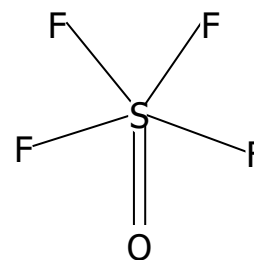

Compound Spectra (overlaid)

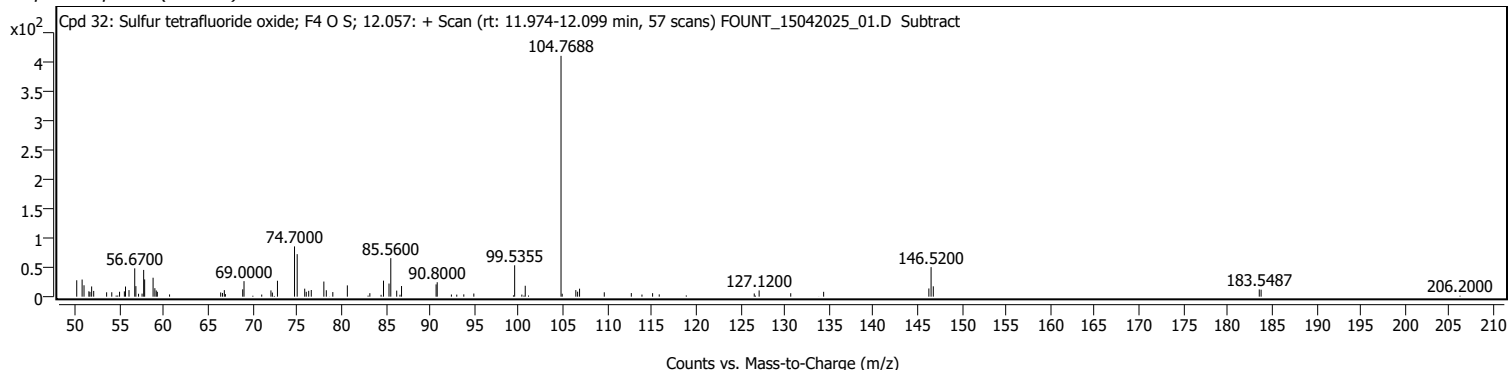

Sulfur tetrafluoride oxide

| m/z (prec.) | Species | CE | Score (Lib) | Score (Fwd) | Score (Rev) | Lib/DB   |
|-------------|---------|----|-------------|-------------|-------------|----------|
| 54.82       |         |    |             |             |             | NIST17.L |

Library Match Details

| m/z (prec.) | Species | CE | Score (Lib) | Score (Fwd) | Score (Rev) | Lib/DB   |
|-------------|---------|----|-------------|-------------|-------------|----------|
| 54.82       |         |    |             |             |             | NIST17.L |

Observed Spectrum

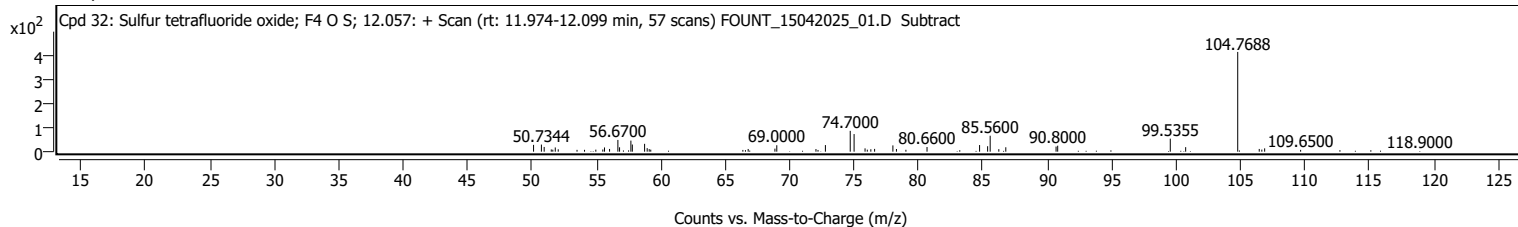

Library Spectrum

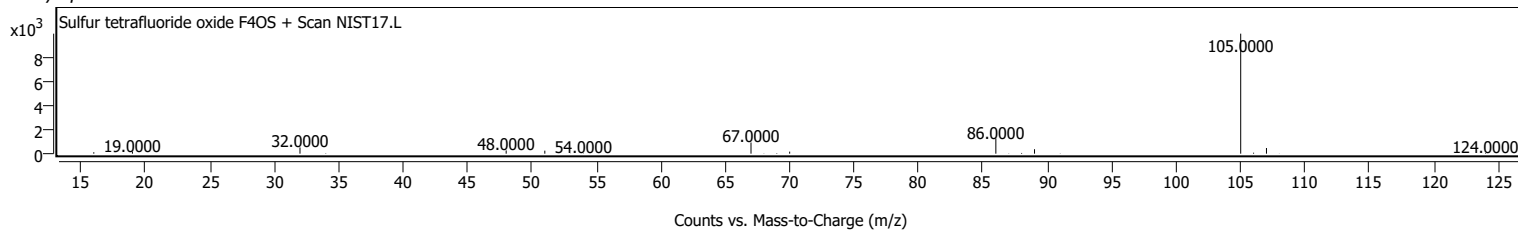

Cpd. 33: Propanoic acid, 2,2-dimethyl-, cesium salt

| Name                                       | Formula  | RT     | CAS        | ID Source | Score | Algorithm | Lib/DB   |
|--------------------------------------------|----------|--------|------------|-----------|-------|-----------|----------|
| Propanoic acid, 2,2-dimethyl-, cesium salt | C5H9CsO2 | 12.624 | 20442-70-0 | LibSearch | 45.33 | Integrate | NIST17.L |

Compound ID Table

| Name                                              | Formula      | ID Source | RT     | CAS          | Score |
|---------------------------------------------------|--------------|-----------|--------|--------------|-------|
| Propanoic acid, 2,2-dimethyl-, cesium salt        | C5H9CsO2     | LibSearch | 12.624 | 20442-70-0   | 45.33 |
| tert-Butyldimethylsilyl trimethylsilyl selenite   | C9H24O3SeSi2 | LibSearch | 12.624 | 1000366-62-2 | 44.42 |
| 6-Azidomethyl-5-bromo-2-t-butyl-[1,3]dioxin-4-one | C9H12BrN3O3  | LibSearch | 12.624 | 116332-67-3  | 42.59 |

Structure

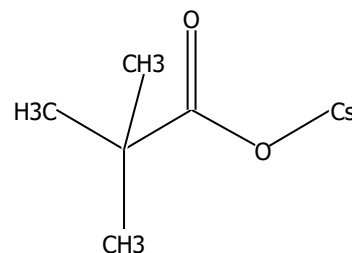

Compound Spectra (overlaid)

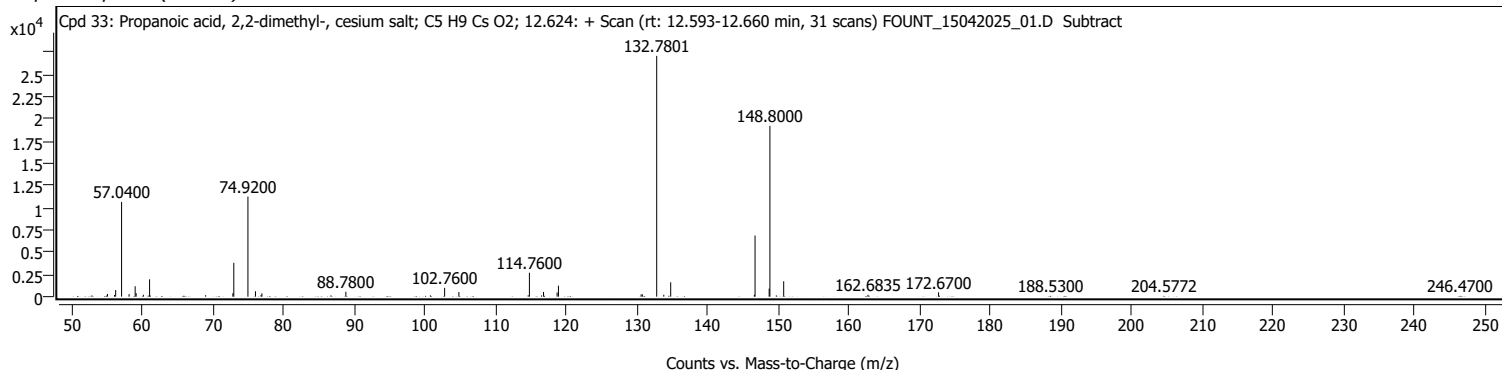

Propanoic acid, 2,2-dimethyl-, cesium salt

| m/z (prec.) | Species | CE | Score (Lib) | Score (Fwd) | Score (Rev) | Lib/DB   |
|-------------|---------|----|-------------|-------------|-------------|----------|
|             |         |    | 45.33       |             |             | NIST17.L |

Library Match Details

| m/z (prec.) | Species | CE | Score (Lib) | Score (Fwd) | Score (Rev) | Lib/DB   |
|-------------|---------|----|-------------|-------------|-------------|----------|
|             |         |    | 45.33       |             |             | NIST17.L |

Observed Spectrum

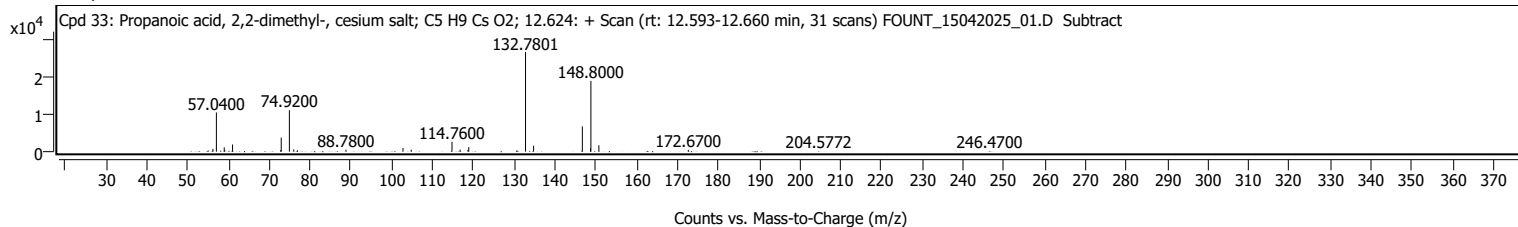

Library Spectrum

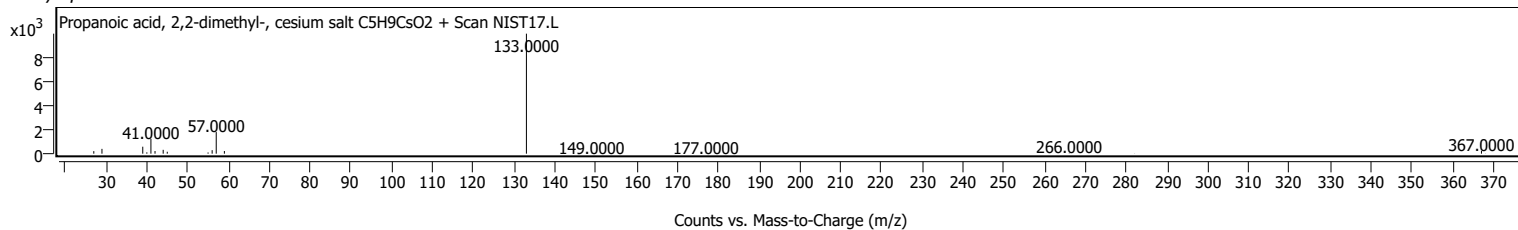

Cpd. 34: Iron(0), (2,3-dimethylbutadiene)-1,2-bis(diisopropylphosphino)ethane

| Name                                                                 | Formula    | RT     | CAS          | ID Source | Score | Algorithm | Lib/DB   |
|----------------------------------------------------------------------|------------|--------|--------------|-----------|-------|-----------|----------|
| Iron(0), (2,3-dimethylbutadiene)-1,2-bis(diisopropylphosphino)ethane | C20H42FeP2 | 12.924 | 1000164-74-3 | LibSearch | 45.08 | Integrate | NIST17.L |

Compound ID Table

| Name                                                                 | Formula    | ID Source | RT     | CAS          | Score |
|----------------------------------------------------------------------|------------|-----------|--------|--------------|-------|
| Iron(0), (2,3-dimethylbutadiene)-1,2-bis(diisopropylphosphino)ethane | C20H42FeP2 | LibSearch | 12.924 | 1000164-74-3 | 45.08 |
| [1,2]Dithiol[1,5-b][1,2]oxathiole-7-SIV, 5-phenyl-                   | C11H8OS2   | LibSearch | 12.924 | 52816-18-9   | 44.02 |
| Phosphinic fluoride, diphenyl-                                       | C12H10FOP  | LibSearch | 12.924 | 1135-98-4    | 41.16 |

Structure

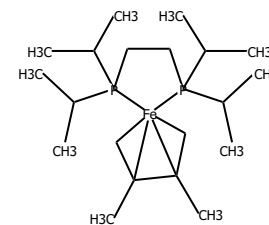

### Compound Spectra (overlaid)

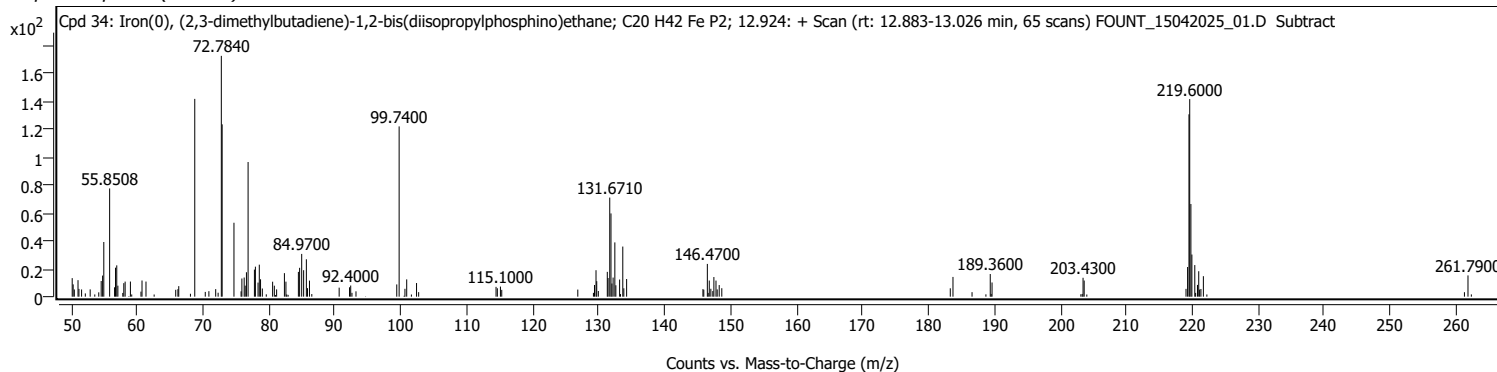

Iron(0), (2,3-dimethylbutadiene)-1,2-bis(diisopropylphosphino)ethane

| m/z (prec.) | Species | CE | Score (Lib) | Score (Fwd) | Score (Rev) | Lib/DB   |
|-------------|---------|----|-------------|-------------|-------------|----------|
|             |         |    | 45.08       |             |             | NIST17.L |

### Library Match Details

| m/z (prec.) | Species | CE | Score (Lib) | Score (Fwd) | Score (Rev) | Lib/DB   |
|-------------|---------|----|-------------|-------------|-------------|----------|
|             |         |    | 45.08       |             |             | NIST17.L |

### Observed Spectrum

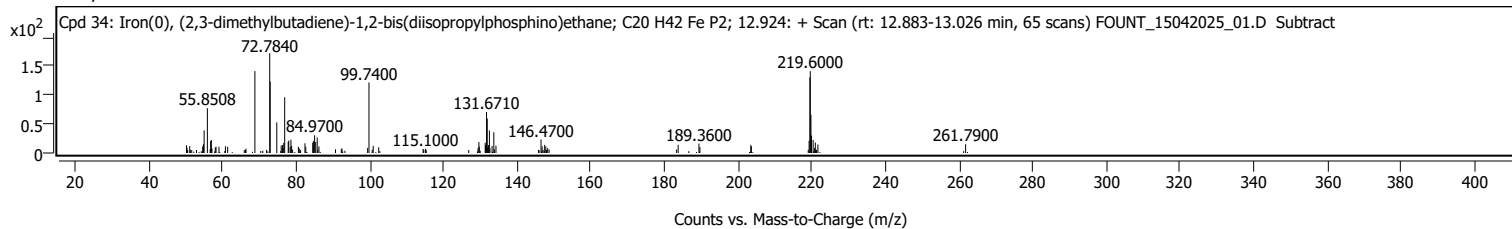

### Library Spectrum

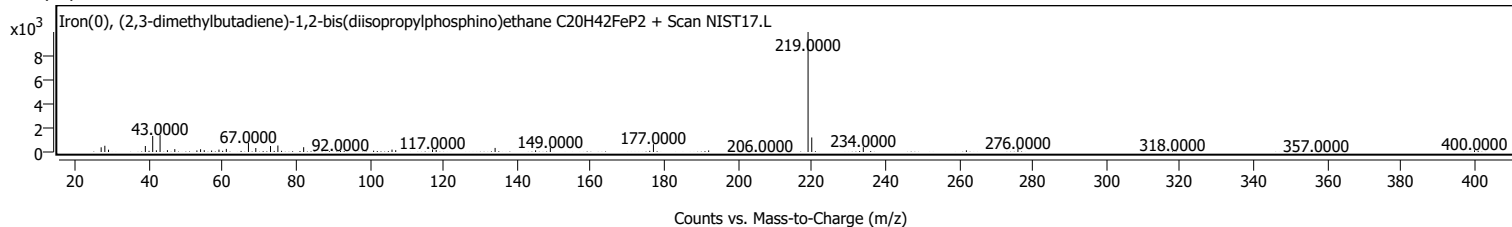

### Cpd. 35: 6-Chloro-3-hydroxypyridazine 1-oxide

| Name                                 | Formula        | RT     | CAS        | ID Source | Score | Algorithm | Lib/DB   |
|--------------------------------------|----------------|--------|------------|-----------|-------|-----------|----------|
| 6-Chloro-3-hydroxypyridazine 1-oxide | C4 H3 Cl N2 O2 | 13.329 | 18259-52-4 | LibSearch | 43.24 | Integrate | NIST17.L |

### Compound ID Table

| Name                                          | Formula    | ID Source | RT     | CAS          | Score |
|-----------------------------------------------|------------|-----------|--------|--------------|-------|
| 6-Chloro-3-hydroxypyridazine 1-oxide          | C4H3ClN2O2 | LibSearch | 13.329 | 18259-52-4   | 43.24 |
| 2-Amino-2-methyl-1-propanol, TBDMS derivative | C10H25NOSi | LibSearch | 13.329 | 1000366-71-7 | 37.65 |
| Bis(tert-butyl dimethylsilyl)amine            | C12H31NSi2 | LibSearch | 13.329 | 1000366-61-6 | 37.15 |

Structure

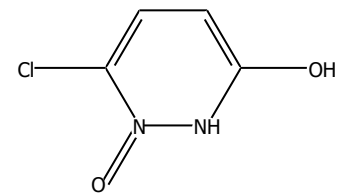

Compound Spectra (overlaid)

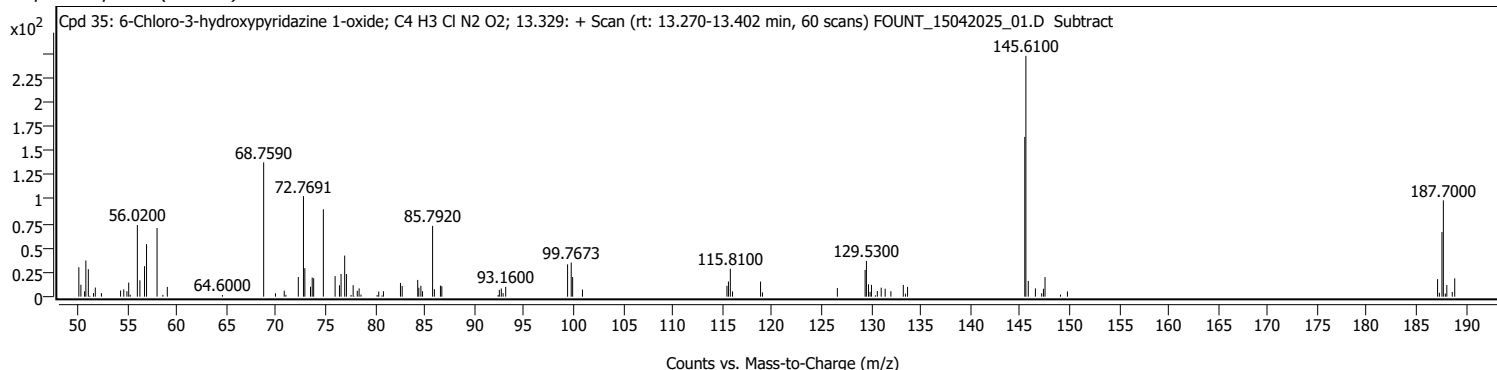

6-Chloro-3-hydroxypyridazine 1-oxide

| m/z (prec.) | Species | CE | Score (Lib) | Score (Fwd) | Score (Rev) | Lib/DB   |
|-------------|---------|----|-------------|-------------|-------------|----------|
|             |         |    | 43.24       |             |             | NIST17.L |

Library Match Details

| m/z (prec.) | Species | CE | Score (Lib) | Score (Fwd) | Score (Rev) | Lib/DB   |
|-------------|---------|----|-------------|-------------|-------------|----------|
|             |         |    | 43.24       |             |             | NIST17.L |

Observed Spectrum

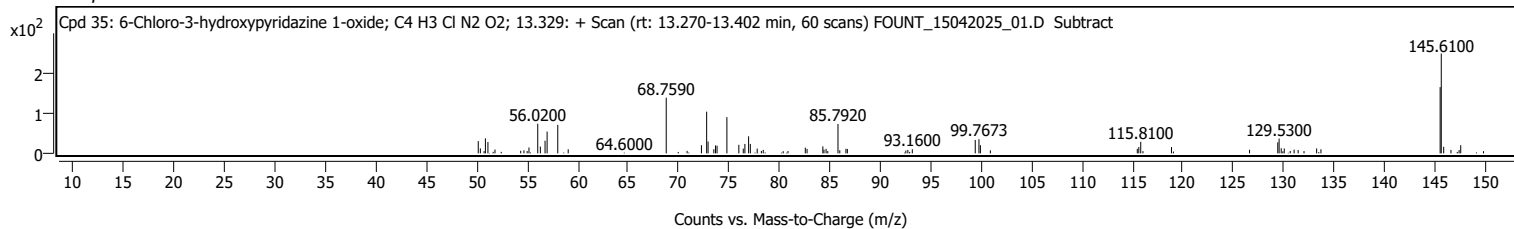

Library Spectrum



Cpd. 36: 1-Methylsilacyclohexane

| Name                    | Formula   | RT     | CAS      | ID Source | Score | Algorithm | Lib/DB   |
|-------------------------|-----------|--------|----------|-----------|-------|-----------|----------|
| 1-Methylsilacyclohexane | C6 H14 Si | 14.046 | 765-62-8 | LibSearch | 51.91 | Integrate | NIST17.L |

Compound ID Table

| Name                           | Formula   | ID Source | RT     | CAS         | Score |
|--------------------------------|-----------|-----------|--------|-------------|-------|
| 1-Methylsilacyclohexane        | C6H14Si   | LibSearch | 14.046 | 765-62-8    | 51.91 |
| Hexyl ethylphosphonofluoridate | C8H18FO2P | LibSearch | 14.046 | 135445-19-1 | 49.71 |
| 1-Methylsilacyclohexane        | C6H14Si   | LibSearch | 14.046 | 765-62-8    | 45.75 |

Structure

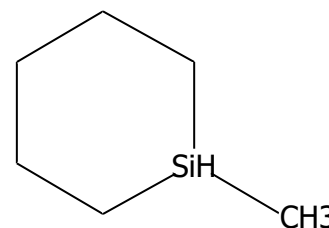

Compound Spectra (overlaid)

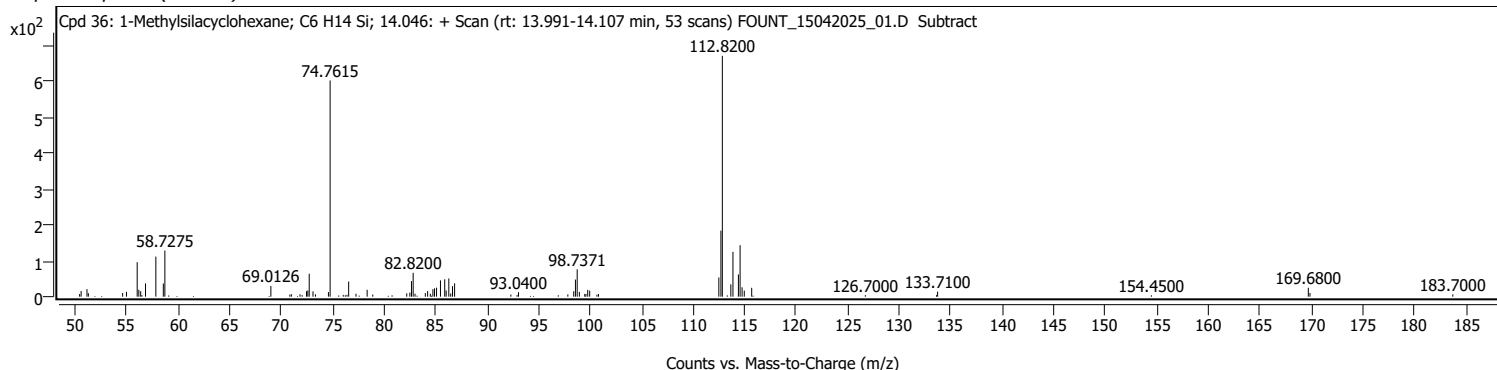

1-Methylsilacyclohexane

| m/z (prec.) | Species | CE | Score (Lib) | Score (Fwd) | Score (Rev) | Lib/DB   |
|-------------|---------|----|-------------|-------------|-------------|----------|
|             |         |    | 51.91       |             |             | NIST17.L |

Library Match Details

| m/z (prec.) | Species | CE | Score (Lib) | Score (Fwd) | Score (Rev) | Lib/DB   |
|-------------|---------|----|-------------|-------------|-------------|----------|
|             |         |    | 51.91       |             |             | NIST17.L |

Observed Spectrum

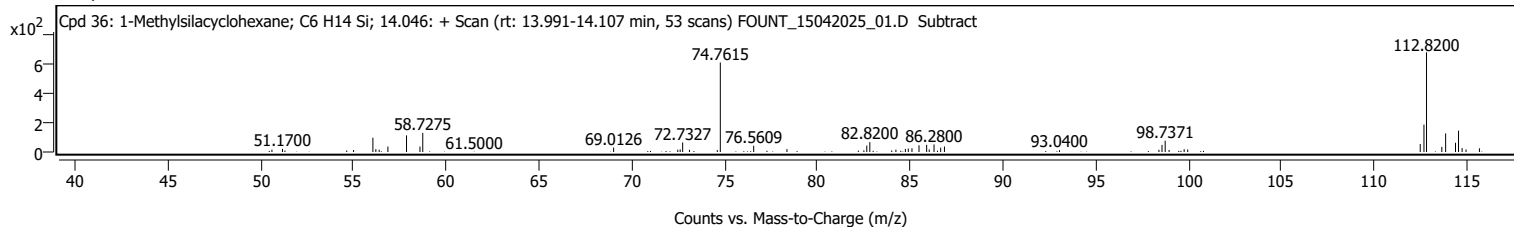

Library Spectrum

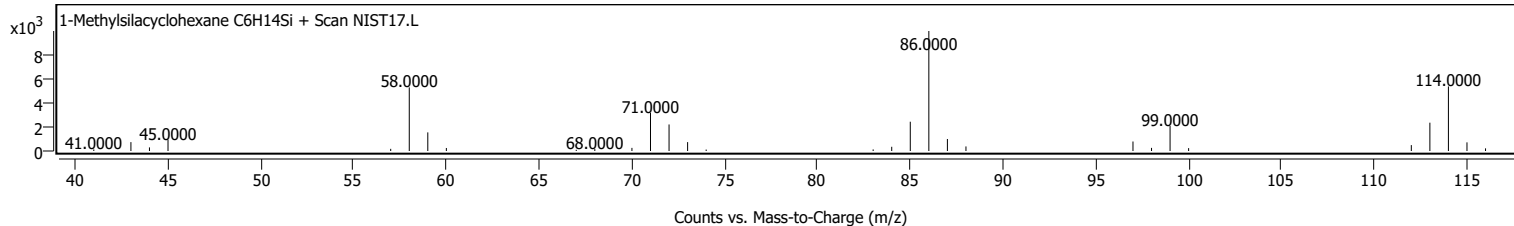

Cpd. 37: Borinic acid, diethyl-

| Name                   | Formula    | RT     | CAS       | ID Source | Score | Algorithm | Lib/DB   |
|------------------------|------------|--------|-----------|-----------|-------|-----------|----------|
| Borinic acid, diethyl- | C4 H11 B O | 15.151 | 4426-31-7 | LibSearch | 46.70 | Integrate | NIST17.L |

Compound ID Table

| Name                   | Formula | ID Source | RT     | CAS       | Score |
|------------------------|---------|-----------|--------|-----------|-------|
| Borinic acid, diethyl- | C4H11BO | LibSearch | 15.151 | 4426-31-7 | 46.70 |
| Borinic acid, diethyl- | C4H11BO | LibSearch | 15.151 | 4426-31-7 | 45.48 |
| Aluminum, triethyl-    | C6H15Al | LibSearch | 15.151 | 97-93-8   | 42.60 |

Structure

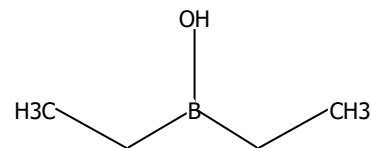

Compound Spectra (overlaid)

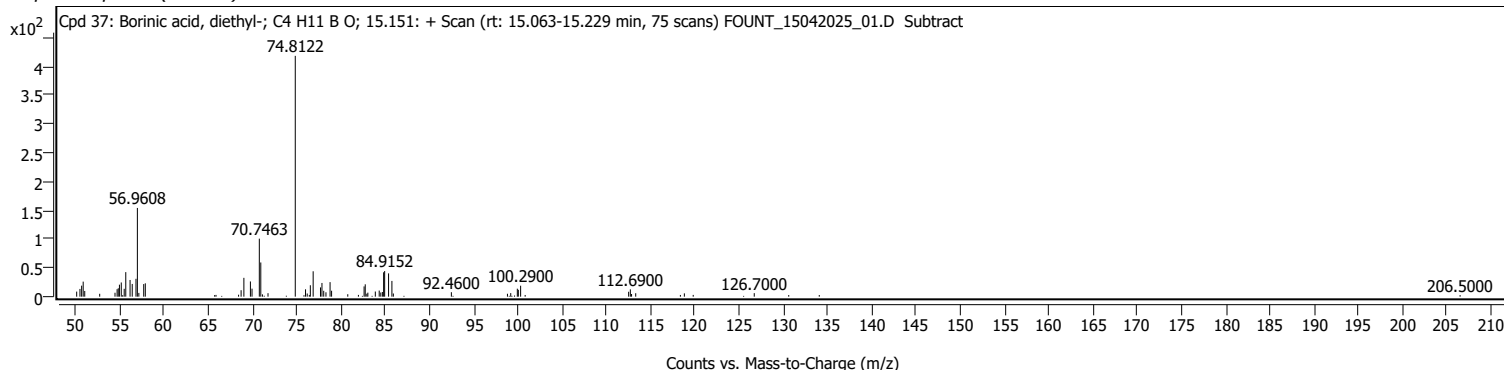

Borinic acid, diethyl-

| m/z (prec.) | Species | CE | Score (Lib) | Score (Fwd) | Score (Rev) | Lib/DB   |
|-------------|---------|----|-------------|-------------|-------------|----------|
|             |         |    | 46.70       |             |             | NIST17.L |

Library Match Details

| m/z (prec.) | Species | CE | Score (Lib) | Score (Fwd) | Score (Rev) | Lib/DB   |
|-------------|---------|----|-------------|-------------|-------------|----------|
|             |         |    | 46.70       |             |             | NIST17.L |

Observed Spectrum

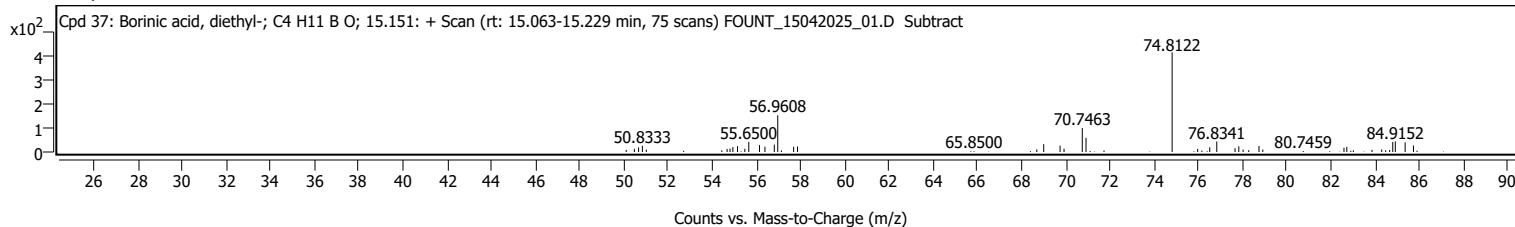

Library Spectrum

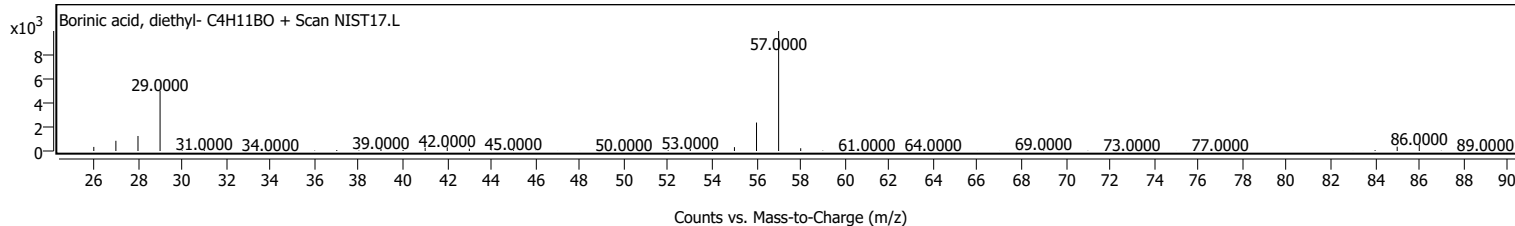

Cpd. 38: 2,2',2''-Nitrilotriethanol, triethyl ether

| Name                                       | Formula      | RT     | CAS          | ID Source | Score | Algorithm | Lib/DB   |
|--------------------------------------------|--------------|--------|--------------|-----------|-------|-----------|----------|
| 2,2',2''-Nitrilotriethanol, triethyl ether | C12 H27 N O3 | 15.441 | 1000378-71-4 | LibSearch | 48.44 | Integrate | NIST17.L |

Compound ID Table

| Name                                       | Formula    | ID Source | RT     | CAS          | Score |
|--------------------------------------------|------------|-----------|--------|--------------|-------|
| 2,2',2''-Nitrilotriethanol, triethyl ether | C12H27NO3  | LibSearch | 15.441 | 1000378-71-4 | 48.44 |
| Isobenzofuran-1(3H)-one, 5-(5-tetrazolyl)- | C9H6N4O2   | LibSearch | 15.441 | 330842-02-9  | 46.34 |
| N,N-Diethyl(trimethylsilyl)carbamate       | C8H19NO2Si | LibSearch | 15.441 | 1000322-56-6 | 45.70 |

Structure

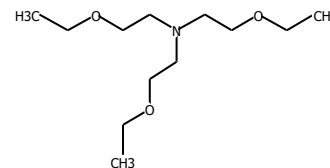

Compound Spectra (overlaid)

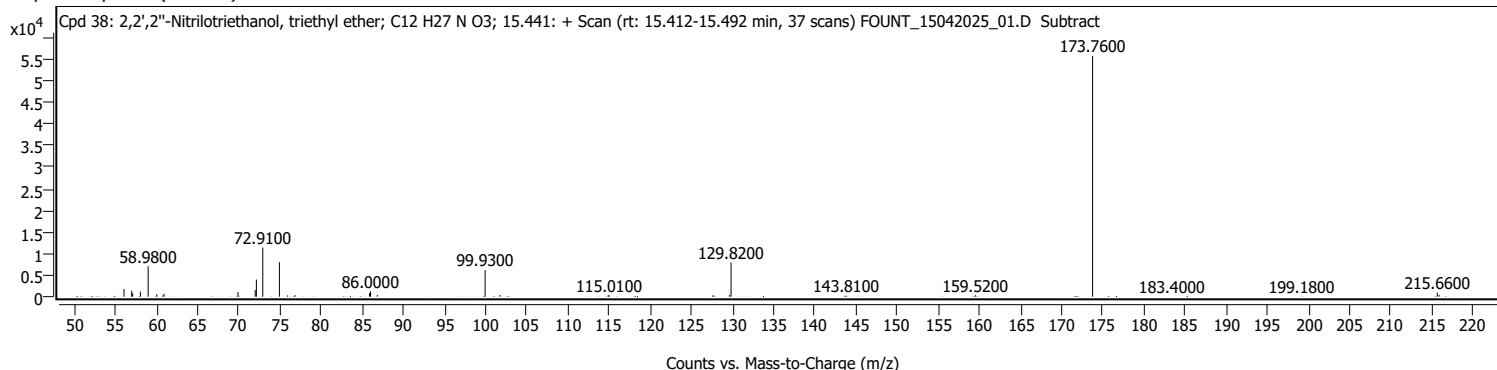

2,2',2''-Nitrilotriethanol, triethyl ether

| m/z (prec.) | Species | CE | Score (Lib) | Score (Fwd) | Score (Rev) | Lib/DB   |
|-------------|---------|----|-------------|-------------|-------------|----------|
|             |         |    | 48.44       |             |             | NIST17.L |

Library Match Details

| m/z (prec.) | Species | CE | Score (Lib) | Score (Fwd) | Score (Rev) | Lib/DB   |
|-------------|---------|----|-------------|-------------|-------------|----------|
|             |         |    | 48.44       |             |             | NIST17.L |

Observed Spectrum

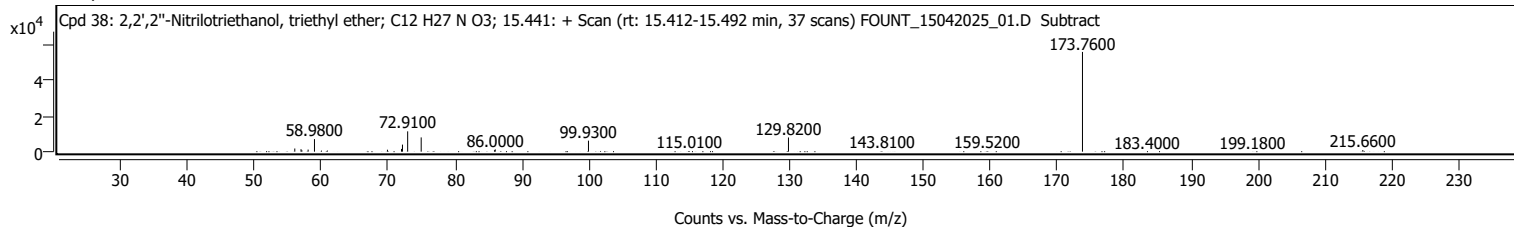

Library Spectrum

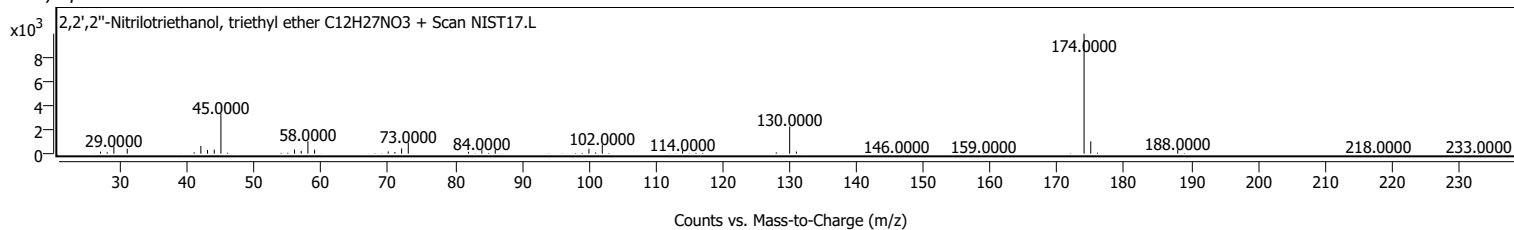

Cpd. 39: Ethyl 1H-tetrazole-5-acetate, TBDMS derivative

| Name                                           | Formula      | RT     | CAS          | ID Source | Score | Algorithm | Lib/DB   |
|------------------------------------------------|--------------|--------|--------------|-----------|-------|-----------|----------|
| Ethyl 1H-tetrazole-5-acetate, TBDMS derivative | C11H22N4O2Si | 15.731 | 1000332-68-6 | LibSearch | 48.70 | Integrate | NIST17.L |

Compound ID Table

| Name                                           | Formula      | ID Source | RT     | CAS          | Score |
|------------------------------------------------|--------------|-----------|--------|--------------|-------|
| Ethyl 1H-tetrazole-5-acetate, TBDMS derivative | C11H22N4O2Si | LibSearch | 15.731 | 1000332-68-6 | 48.70 |
| Silane, (3-iodopropyl)trimethyl-               | C6H15SiI     | LibSearch | 15.731 | 18135-48-3   | 45.17 |
| 1,1,1,2-Tetramethyldisilane                    | C4H14Si2     | LibSearch | 15.731 | 1000433-69-5 | 38.53 |

## Structure

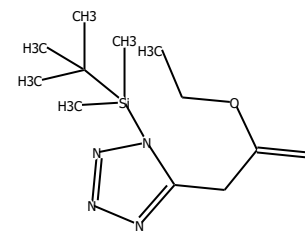

### Compound Spectra (overlaid)

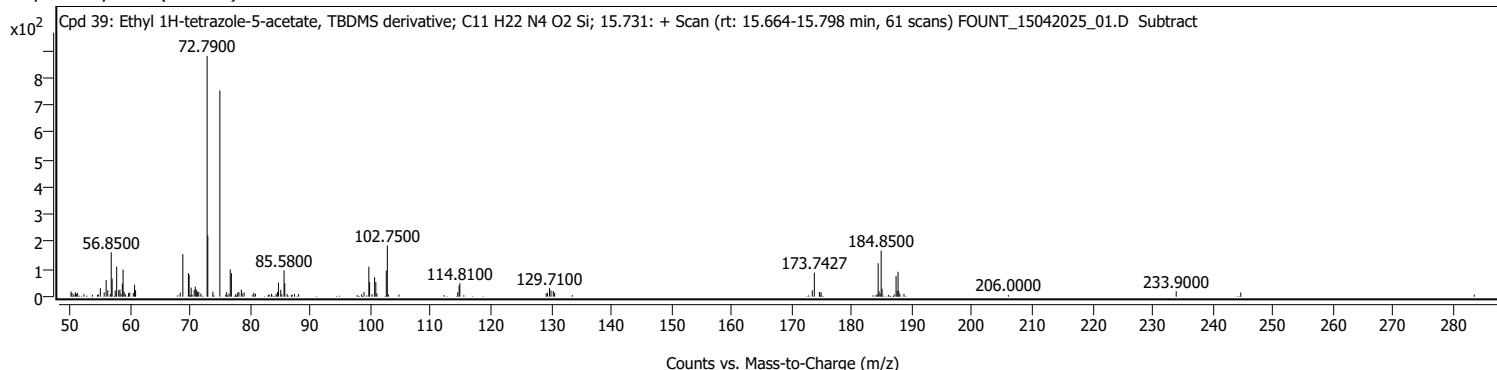

### Ethyl 1H-tetrazole-5-acetate, TBDMS derivative

| m/z (prec.) | Species | CE | Score (Lib) | Score (Fwd) | Score (Rev) | Lib/DB   |
|-------------|---------|----|-------------|-------------|-------------|----------|
|             |         |    | 48.70       |             |             | NIST17.L |

### Library Match Details

| m/z (prec.) | Species | CE | Score (Lib) | Score (Fwd) | Score (Rev) | Lib/DB   |
|-------------|---------|----|-------------|-------------|-------------|----------|
|             |         |    | 48.70       |             |             | NIST17.L |

### Observed Spectrum

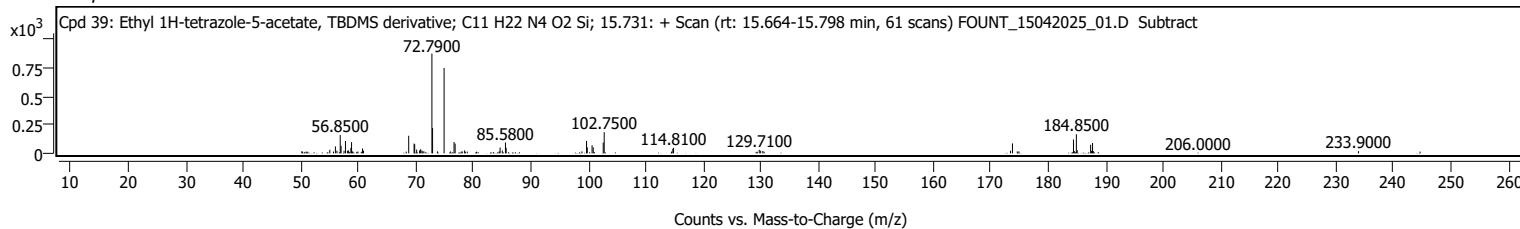

### Library Spectrum

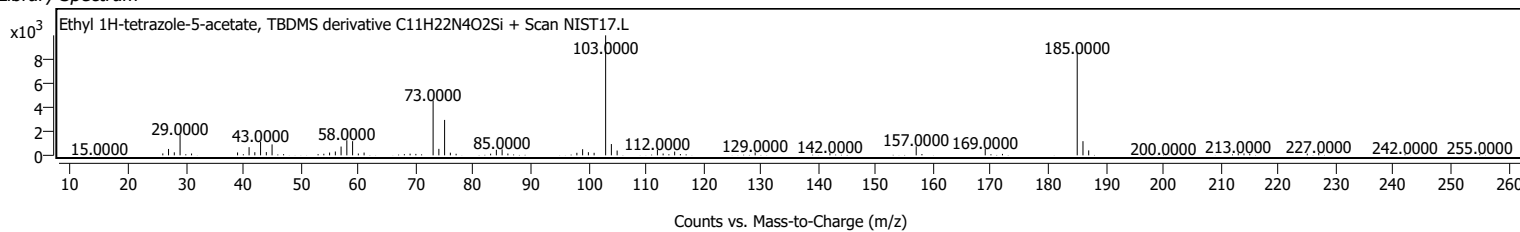

### Cpd. 40: Boric acid, 3TMS derivative

| Name                        | Formula         | RT     | CAS       | ID Source | Score | Algorithm | Lib/DB   |
|-----------------------------|-----------------|--------|-----------|-----------|-------|-----------|----------|
| Boric acid, 3TMS derivative | C9 H27 B O3 Si3 | 15.916 | 4325-85-3 | LibSearch | 77.52 | Integrate | NIST17.L |

### Compound ID Table

| Name                        | Formula     | ID Source | RT     | CAS       | Score |
|-----------------------------|-------------|-----------|--------|-----------|-------|
| Boric acid, 3TMS derivative | C9H27BO3Si3 | LibSearch | 15.916 | 4325-85-3 | 77.52 |
| Boric acid, 3TMS derivative | C9H27BO3Si3 | LibSearch | 15.916 | 4325-85-3 | 76.90 |
| Boric acid, 3TMS derivative | C9H27BO3Si3 | LibSearch | 15.916 | 4325-85-3 | 75.45 |

Structure

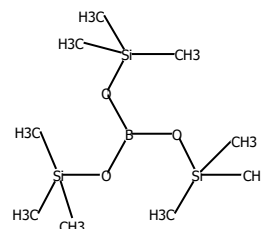

Compound Spectra (overlaid)

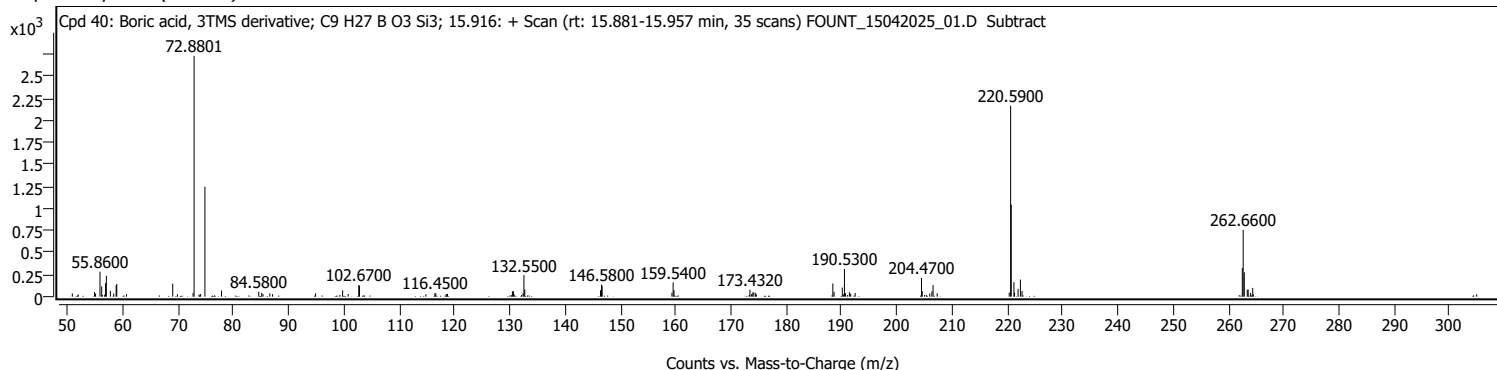

Boric acid, 3TMS derivative

| m/z (prec.) | Species | CE | Score (Lib) | Score (Fwd) | Score (Rev) | Lib/DB   |
|-------------|---------|----|-------------|-------------|-------------|----------|
| 77.52       |         |    |             |             |             | NIST17.L |

Library Match Details

| m/z (prec.) | Species | CE | Score (Lib) | Score (Fwd) | Score (Rev) | Lib/DB   |
|-------------|---------|----|-------------|-------------|-------------|----------|
| 77.52       |         |    |             |             |             | NIST17.L |

Observed Spectrum

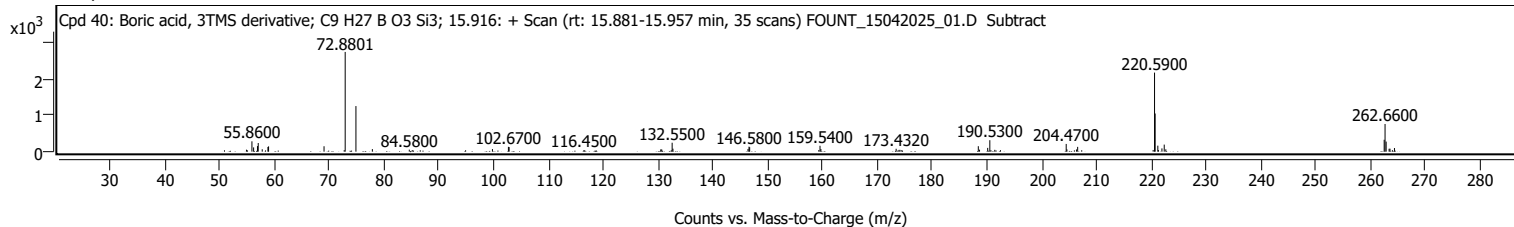

Library Spectrum

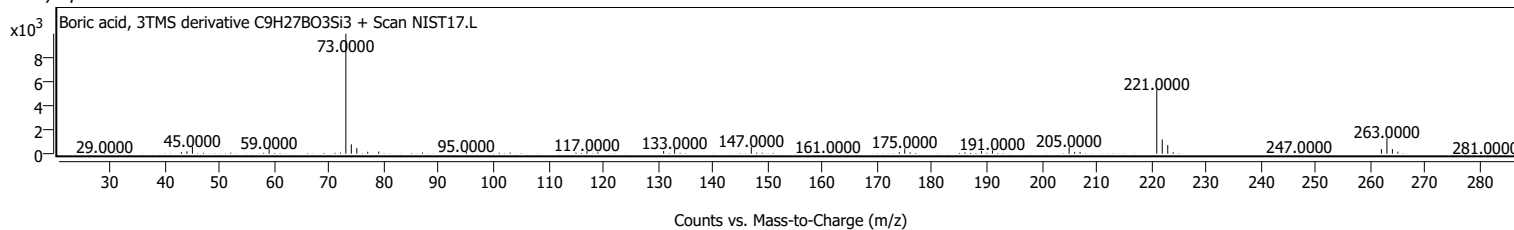

Cpd. 41: Isothiocyanatoacetaldehyde dimethyl acetal

| Name                                       | Formula  | RT     | CAS        | ID Source | Score | Algorithm | Lib/DB   |
|--------------------------------------------|----------|--------|------------|-----------|-------|-----------|----------|
| Isothiocyanatoacetaldehyde dimethyl acetal | C5H9NO2S | 16.371 | 75052-04-9 | LibSearch | 44.08 | Integrate | NIST17.L |

Compound ID Table

| Name                                       | Formula  | ID Source | RT     | CAS        | Score |
|--------------------------------------------|----------|-----------|--------|------------|-------|
| Isothiocyanatoacetaldehyde dimethyl acetal | C5H9NO2S | LibSearch | 16.371 | 75052-04-9 | 44.08 |
| Silane, methylenebis-                      | CH8Si2   | LibSearch | 16.371 | 1759-88-2  | 41.63 |
| Borinic acid, diethyl-                     | C4H11BO  | LibSearch | 16.371 | 4426-31-7  | 36.97 |

Structure

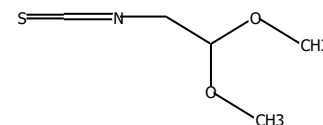

Compound Spectra (overlaid)

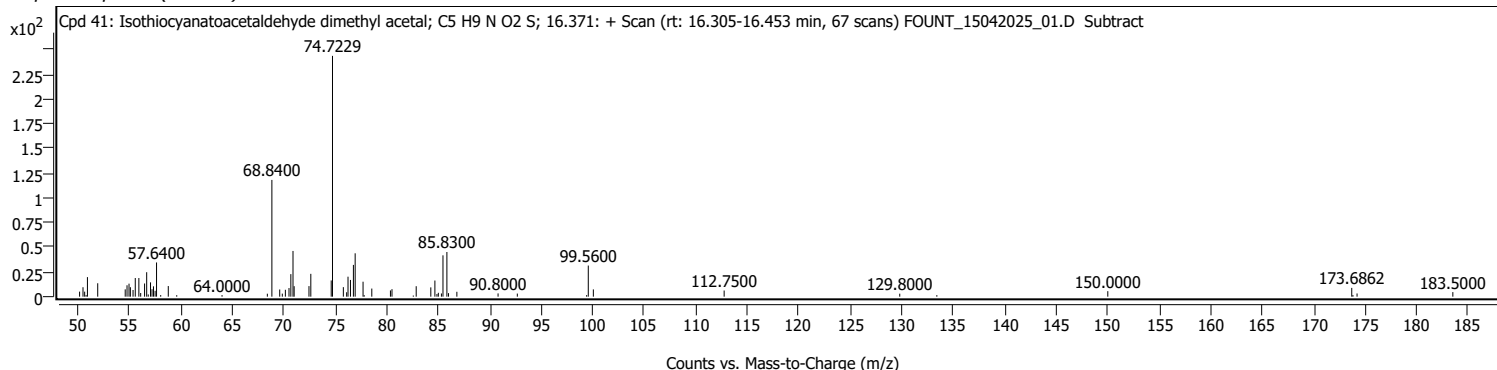

Isothiocyanatoacetaldehyde dimethyl acetal

| m/z (prec.) | Species | CE | Score (Lib) | Score (Fwd) | Score (Rev) | Lib/DB   |
|-------------|---------|----|-------------|-------------|-------------|----------|
|             |         |    | 44.08       |             |             | NIST17.L |

Library Match Details

| m/z (prec.) | Species | CE | Score (Lib) | Score (Fwd) | Score (Rev) | Lib/DB   |
|-------------|---------|----|-------------|-------------|-------------|----------|
|             |         |    | 44.08       |             |             | NIST17.L |

Observed Spectrum

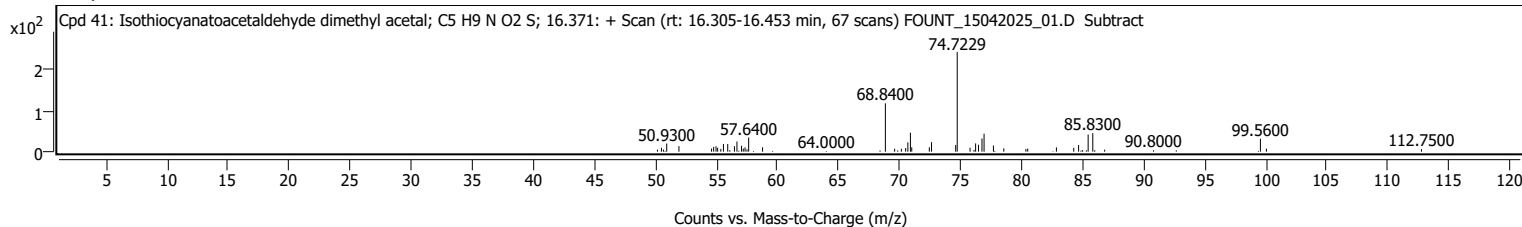

Library Spectrum

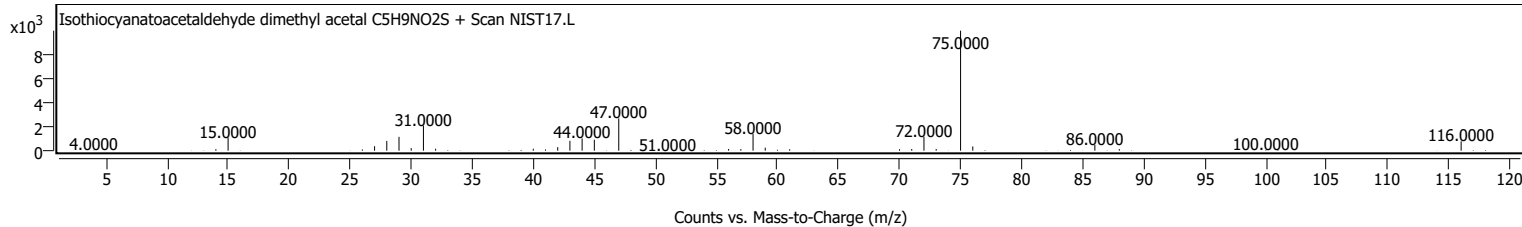

Cpd. 42: Isothiocyanatoacetaldehyde dimethyl acetal

| Name                                       | Formula  | RT     | CAS        | ID Source | Score | Algorithm | Lib/DB   |
|--------------------------------------------|----------|--------|------------|-----------|-------|-----------|----------|
| Isothiocyanatoacetaldehyde dimethyl acetal | C5H9NO2S | 16.571 | 75052-04-9 | LibSearch | 39.22 | Integrate | NIST17.L |

Compound ID Table

| Name                                                    | Formula      | ID Source | RT     | CAS          | Score |
|---------------------------------------------------------|--------------|-----------|--------|--------------|-------|
| Isothiocyanatoacetaldehyde dimethyl acetal              | C5H9NO2S     | LibSearch | 16.571 | 75052-04-9   | 39.22 |
| Ethyl 1H-tetrazole-5-acetate, TBDMS derivative          | C11H22N4O2Si | LibSearch | 16.571 | 1000332-68-6 | 38.83 |
| 2-Pyrrol[tert-butyl(dimethyl)silyl]oxymorphopropan-1-ol | C9H22O2Si    | LibSearch | 16.571 | 1000333-03-6 | 38.01 |

Structure



Compound Spectra (overlaid)

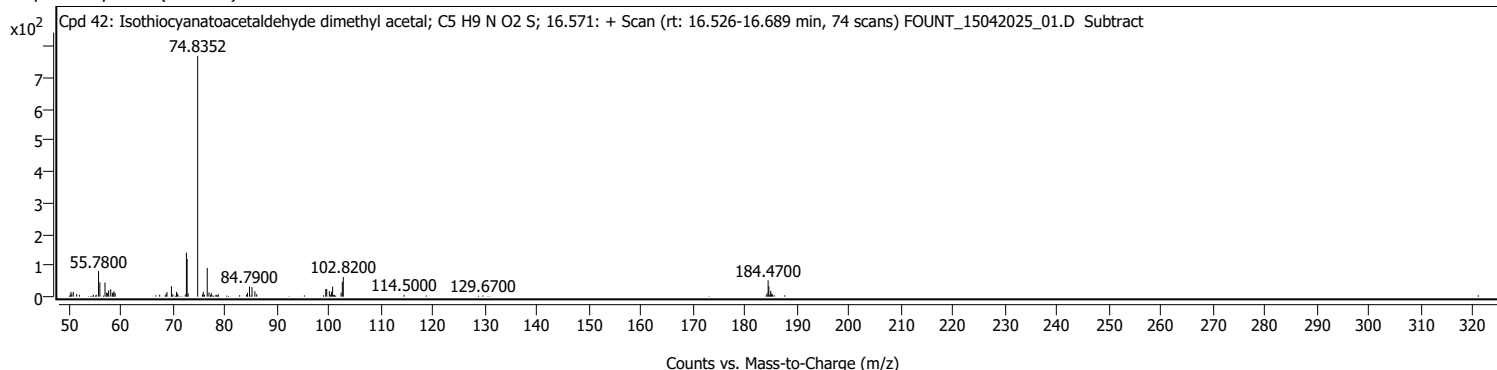

Isothiocyanatoacetaldehyde dimethyl acetal

| m/z (prec.) | Species | CE | Score (Lib) | Score (Fwd) | Score (Rev) | Lib/DB   |
|-------------|---------|----|-------------|-------------|-------------|----------|
|             |         |    | 39.22       |             |             | NIST17.L |

Library Match Details

| m/z (prec.) | Species | CE | Score (Lib) | Score (Fwd) | Score (Rev) | Lib/DB   |
|-------------|---------|----|-------------|-------------|-------------|----------|
|             |         |    | 39.22       |             |             | NIST17.L |

Observed Spectrum

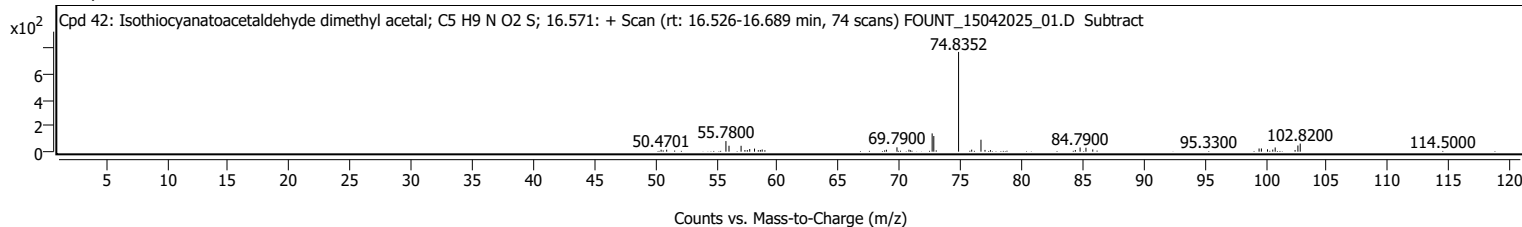

Library Spectrum



Cpd. 43: l-Leucine, N-(2-methoxyethoxycarbonyl)-, butyl ester

| Name                                                 | Formula   | RT     | CAS          | ID Source | Score | Algorithm | Lib/DB   |
|------------------------------------------------------|-----------|--------|--------------|-----------|-------|-----------|----------|
| l-Leucine, N-(2-methoxyethoxycarbonyl)-, butyl ester | C14H27NO5 | 17.430 | 1000327-96-4 | LibSearch | 51.87 | Integrate | NIST17.L |

Compound ID Table

| Name                                                        | Formula   | ID Source | RT     | CAS          | Score |
|-------------------------------------------------------------|-----------|-----------|--------|--------------|-------|
| l-Leucine, N-(2-methoxyethoxycarbonyl)-, butyl ester        | C14H27NO5 | LibSearch | 17.430 | 1000327-96-4 | 51.87 |
| l-Leucine, N-(2-methoxyethoxycarbonyl)-, heptyl ester       | C17H33NO5 | LibSearch | 17.430 | 1000327-96-7 | 51.68 |
| DL-Norleucine, N-(2-methoxyethoxycarbonyl)-, isohexyl ester | C16H31NO5 | LibSearch | 17.430 | 1000339-07-6 | 50.93 |

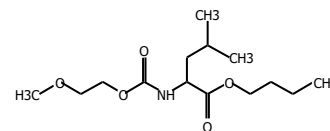

Compound Spectra (overlaid)

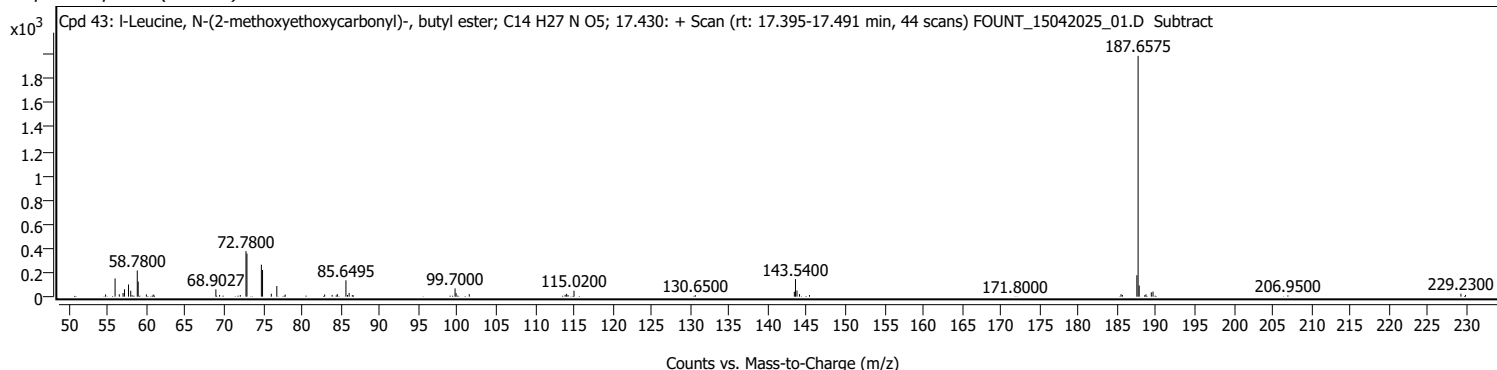

I-Leucine, N-(2-methoxyethoxycarbonyl)-, butyl ester

| m/z (prec.) | Species | CE | Score (Lib) | Score (Fwd) | Score (Rev) | Lib/DB   |
|-------------|---------|----|-------------|-------------|-------------|----------|
| 51.87       |         |    | 51.87       |             |             | NIST17.L |

Library Match Details

| m/z (prec.) | Species | CE | Score (Lib) | Score (Fwd) | Score (Rev) | Lib/DB   |
|-------------|---------|----|-------------|-------------|-------------|----------|
| 51.87       |         |    | 51.87       |             |             | NIST17.L |

Observed Spectrum

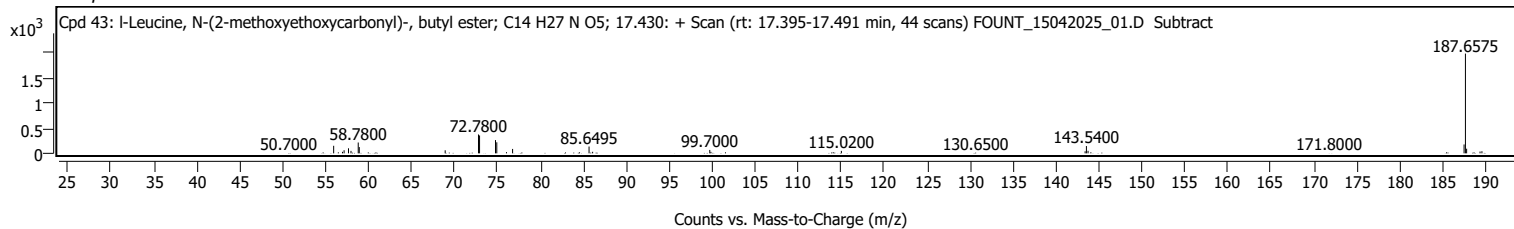

Library Spectrum

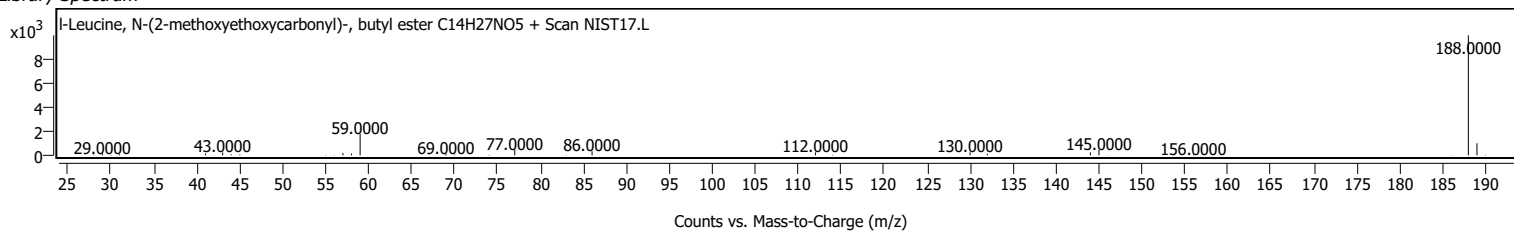

Cpd. 44: Bis(tert-butylidimethylsilyl) carbonate

| Name                                    | Formula     | RT     | CAS          | ID Source | Score | Algorithm | Lib/DB   |
|-----------------------------------------|-------------|--------|--------------|-----------|-------|-----------|----------|
| Bis(tert-butylidimethylsilyl) carbonate | C13H30O3Si2 | 17.630 | 1000366-56-7 | LibSearch | 69.51 | Integrate | NIST17.L |

Compound ID Table

| Name                                    | Formula     | ID Source | RT     | CAS          | Score |
|-----------------------------------------|-------------|-----------|--------|--------------|-------|
| Bis(tert-butylidimethylsilyl) carbonate | C13H30O3Si2 | LibSearch | 17.630 | 1000366-56-7 | 69.51 |
| Ethylene glycol, 2TBDMS derivative      | C14H34O2Si2 | LibSearch | 17.630 | 66548-22-9   | 66.33 |
| 4-Hydroxybutanoic acid, 2TMS derivative | C10H24O3Si2 | LibSearch | 17.630 | 55133-95-4   | 61.17 |

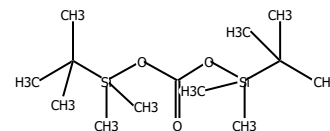

Compound Spectra (overlaid)

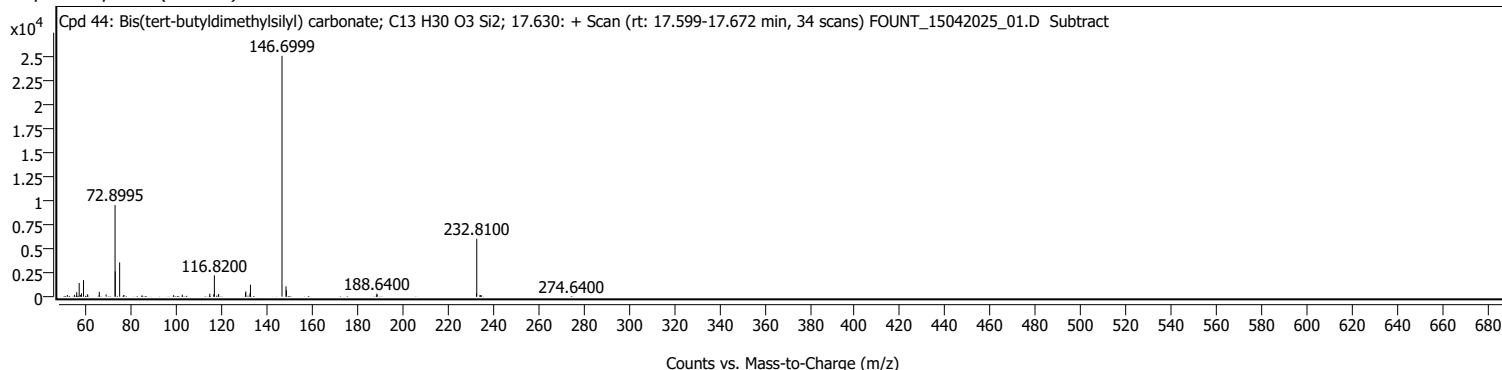

Bis(tert-butyltrimethylsilyl) carbonate

| m/z (prec.) | Species | CE | Score (Lib) | Score (Fwd) | Score (Rev) | Lib/DB   |
|-------------|---------|----|-------------|-------------|-------------|----------|
|             |         |    | 69.51       |             |             | NIST17.L |

Library Match Details

| m/z (prec.) | Species | CE | Score (Lib) | Score (Fwd) | Score (Rev) | Lib/DB   |
|-------------|---------|----|-------------|-------------|-------------|----------|
|             |         |    | 69.51       |             |             | NIST17.L |

Observed Spectrum

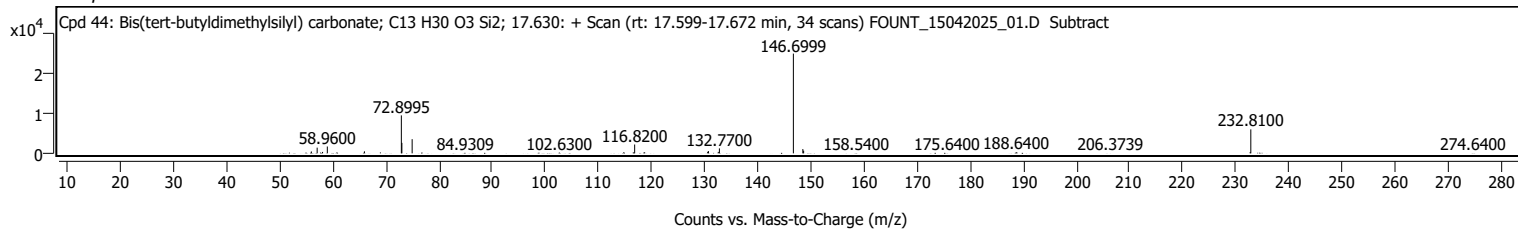

Library Spectrum

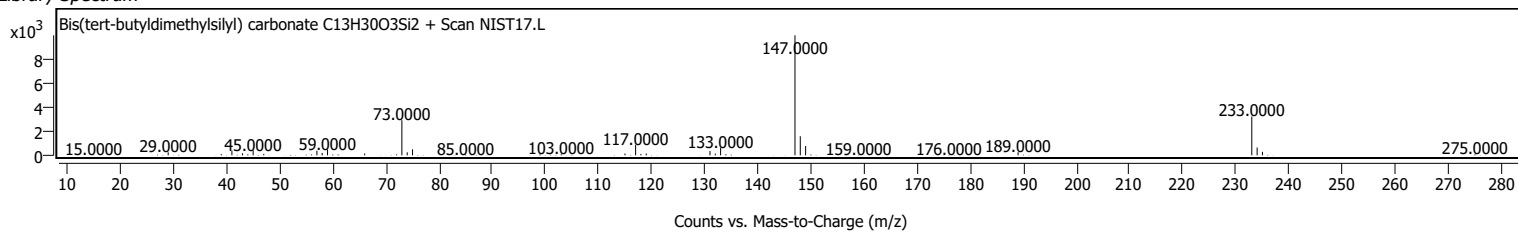

Cpd. 45: Bis(trimethylsilyl) methylboronate

| Name                               | Formula         | RT     | CAS          | ID Source | Score | Algorithm | Lib/DB   |
|------------------------------------|-----------------|--------|--------------|-----------|-------|-----------|----------|
| Bis(trimethylsilyl) methylboronate | C7 H21 B O2 Si2 | 20.384 | 1000376-32-7 | LibSearch | 67.42 | Integrate | NIST17.L |

Compound ID Table

| Name                               | Formula     | ID Source | RT     | CAS          | Score |
|------------------------------------|-------------|-----------|--------|--------------|-------|
| Bis(trimethylsilyl) methylboronate | C7H21BO2Si2 | LibSearch | 20.384 | 1000376-32-7 | 67.42 |
| Oxalic acid, 2TBDMMS derivative    | C14H30O4Si2 | LibSearch | 20.384 | 104255-91-6  | 63.10 |
| Oxalic acid, 2TBDMMS derivative    | C14H30O4Si2 | LibSearch | 20.384 | 104255-91-6  | 61.45 |

Structure

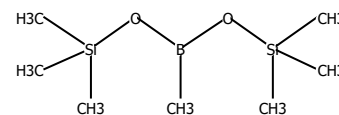

Compound Spectra (overlaid)

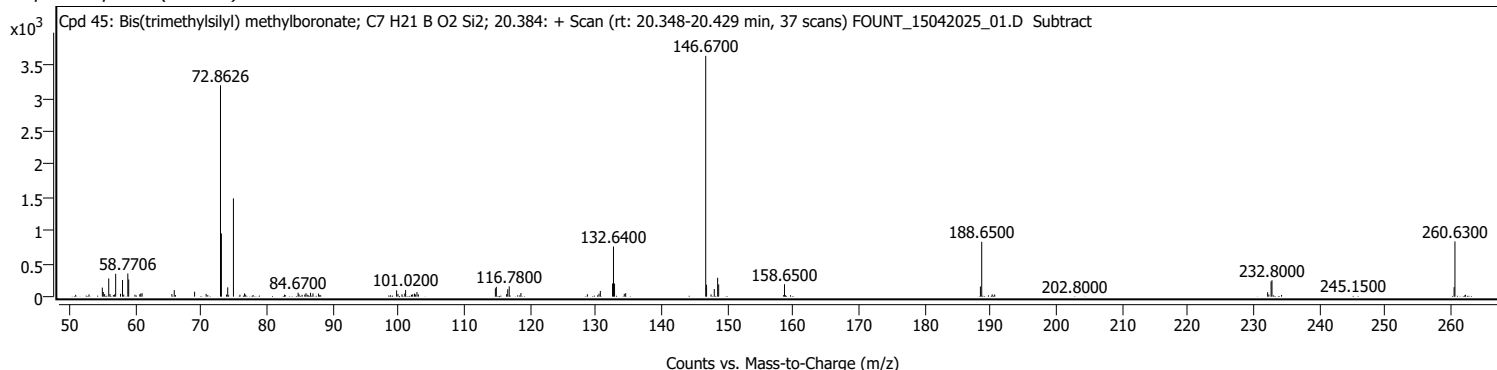

Bis(trimethylsilyl) methylboronate

| m/z (prec.) | Species | CE | Score (Lib) | Score (Fwd) | Score (Rev) | Lib/DB   |
|-------------|---------|----|-------------|-------------|-------------|----------|
| 67.42       |         |    |             |             |             | NIST17.L |

Library Match Details

| m/z (prec.) | Species | CE | Score (Lib) | Score (Fwd) | Score (Rev) | Lib/DB   |
|-------------|---------|----|-------------|-------------|-------------|----------|
| 67.42       |         |    |             |             |             | NIST17.L |

Observed Spectrum

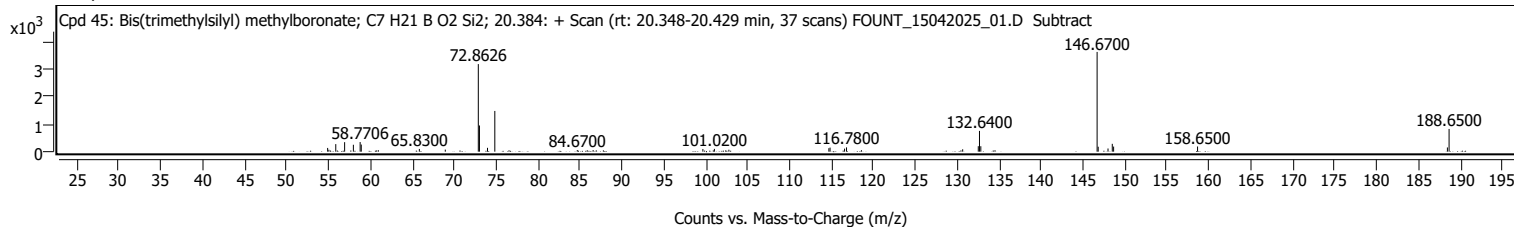

Library Spectrum



Cpd. 46: Isothiocyanatoacetaldehyde dimethyl acetal

| Name                                       | Formula  | RT     | CAS        | ID Source | Score | Algorithm | Lib/DB   |
|--------------------------------------------|----------|--------|------------|-----------|-------|-----------|----------|
| Isothiocyanatoacetaldehyde dimethyl acetal | C5H9NO2S | 21.911 | 75052-04-9 | LibSearch | 40.93 | Integrate | NIST17.L |

Compound ID Table

| Name                                                  | Formula   | ID Source | RT     | CAS          | Score |
|-------------------------------------------------------|-----------|-----------|--------|--------------|-------|
| Isothiocyanatoacetaldehyde dimethyl acetal            | C5H9NO2S  | LibSearch | 21.911 | 75052-04-9   | 40.93 |
| Silane, methylenebis-                                 | CH8Si2    | LibSearch | 21.911 | 1759-88-2    | 35.71 |
| trans-2-Trimethylsilyl-cyclopropane-1-carboxylic acid | C7H14O2Si | LibSearch | 21.911 | 1000144-36-3 | 34.34 |

# Compound Discovery Report

Structure



## Compound Spectra (overlaid)

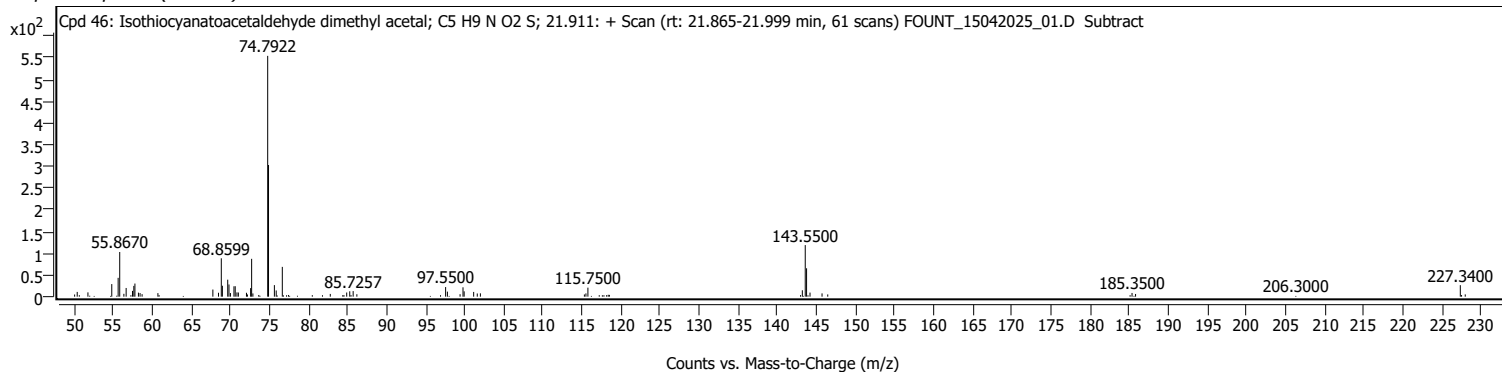

## Isothiocyanatoacetaldehyde dimethyl acetal

| m/z (prec.) | Species | CE | Score (Lib) | Score (Fwd) | Score (Rev) | Lib/DB   |
|-------------|---------|----|-------------|-------------|-------------|----------|
| 40.93       |         |    |             |             |             | NIST17.L |

## Library Match Details

| m/z (prec.) | Species | CE | Score (Lib) | Score (Fwd) | Score (Rev) | Lib/DB   |
|-------------|---------|----|-------------|-------------|-------------|----------|
| 40.93       |         |    |             |             |             | NIST17.L |

## Observed Spectrum

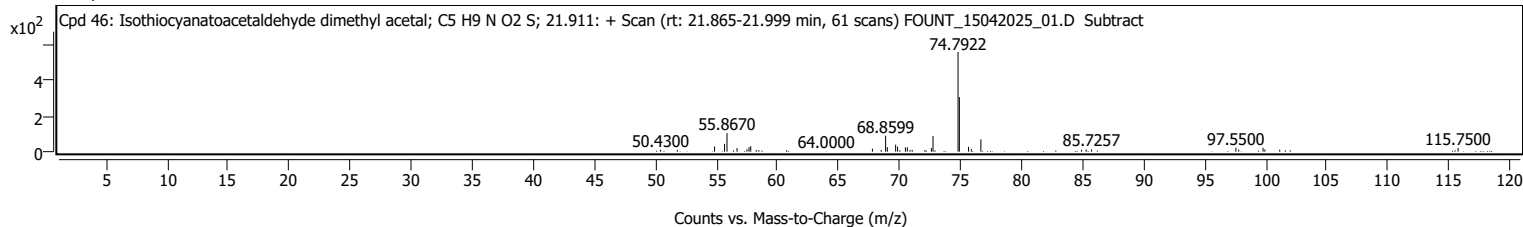

## Library Spectrum



## Cpd 47: 36.051

| Name | Formula | RT     | CAS | ID Source | Score | Algorithm | Lib/DB |
|------|---------|--------|-----|-----------|-------|-----------|--------|
|      |         | 36.051 |     |           |       | Integrate |        |

Structure

## Compound Spectra (overlaid)

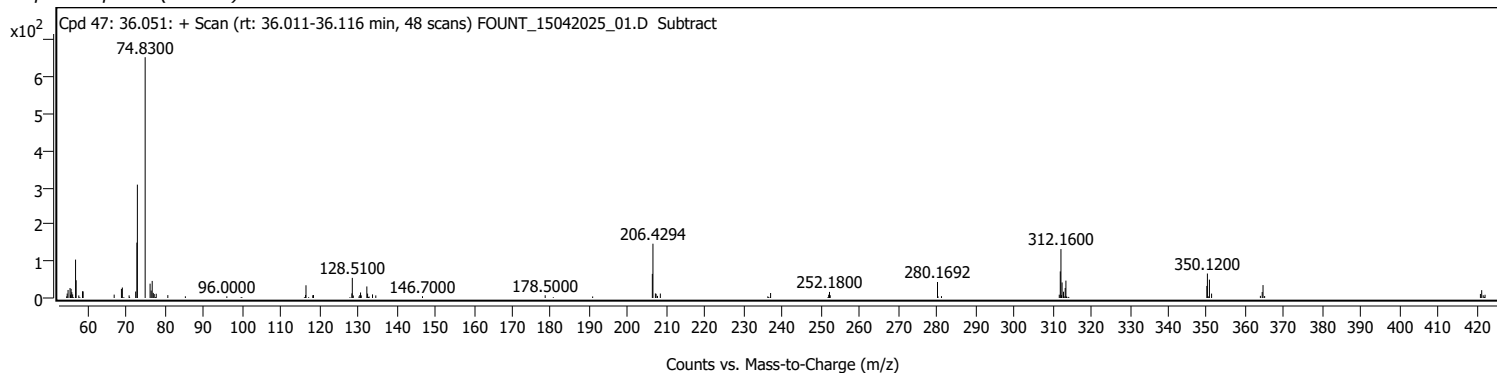

## Cpd. 48: Caprolactone oxime, (NB)-O-[(diethylboryloxy)(ethyl)boryl]-

| Name                                                        | Formula      | RT     | CAS          | ID Source | Score | Algorithm | Lib/DB   |
|-------------------------------------------------------------|--------------|--------|--------------|-----------|-------|-----------|----------|
| Caprolactone oxime, (NB)-O-[(diethylboryloxy)(ethyl)boryl]- | C12H25B2N O2 | 40.021 | 1000161-37-6 | LibSearch | 44.70 | Integrate | NIST17.L |

## Compound ID Table

| Name                                                        | Formula     | ID Source | RT     | CAS          | Score |
|-------------------------------------------------------------|-------------|-----------|--------|--------------|-------|
| Caprolactone oxime, (NB)-O-[(diethylboryloxy)(ethyl)boryl]- | C12H25B2NO2 | LibSearch | 40.021 | 1000161-37-6 | 44.70 |
| N,N-Dimethyl-4-nitroso-3-(trimethylsilyl)aniline            | C11H18N2OSi | LibSearch | 40.021 | 17993-84-9   | 43.27 |
| 4-Pyridinol-3,5-dichloro-2,6-dimethyl-1-oxide               | C7H7Cl2NO2  | LibSearch | 40.021 | 1000252-90-7 | 34.38 |

## Structure

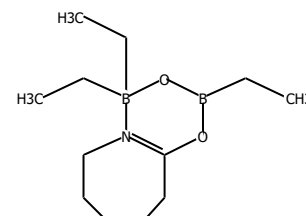

## Compound Spectra (overlaid)

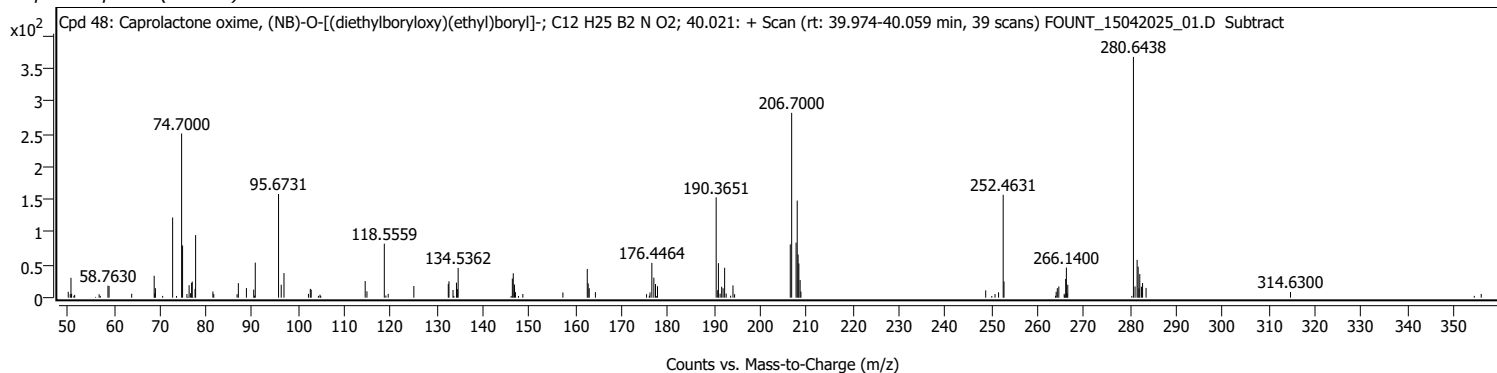

## Caprolactone oxime, (NB)-O-[(diethylboryloxy)(ethyl)boryl]-

| m/z (prec.) | Species | CE | Score (Lib) | Score (Fwd) | Score (Rev) | Lib/DB   |
|-------------|---------|----|-------------|-------------|-------------|----------|
|             |         |    | 44.70       |             |             | NIST17.L |

## Library Match Details

| m/z (prec.) | Species | CE | Score (Lib) | Score (Fwd) | Score (Rev) | Lib/DB   |
|-------------|---------|----|-------------|-------------|-------------|----------|
|             |         |    | 44.70       |             |             | NIST17.L |

## Observed Spectrum

# Compound Discovery Report

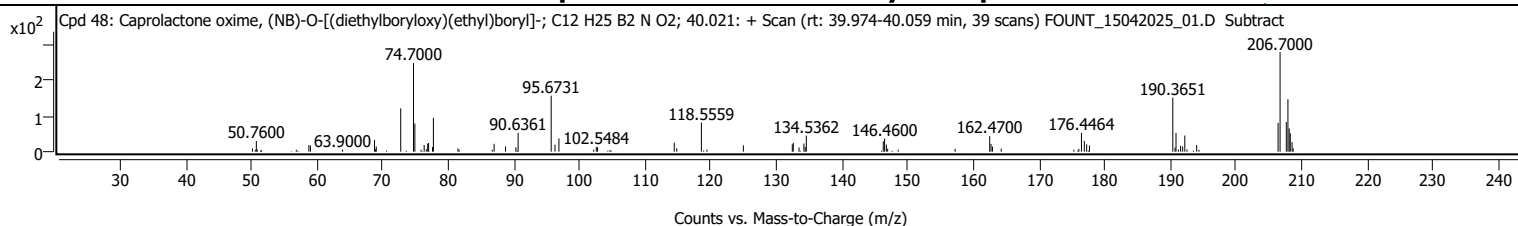

## Library Spectrum

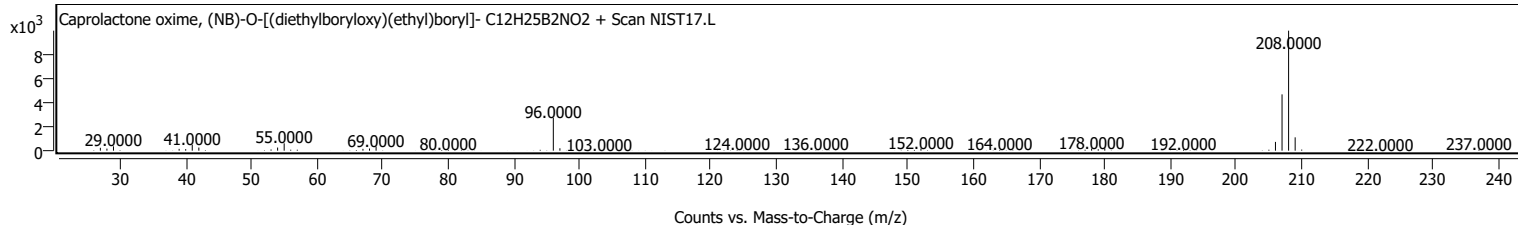

## Cpd. 49: Tris(tert-butylidimethylsilyloxy)arsane

| Name                                    | Formula           | RT     | CAS          | ID Source | Score | Algorithm | Lib/DB   |
|-----------------------------------------|-------------------|--------|--------------|-----------|-------|-----------|----------|
| Tris(tert-butylidimethylsilyloxy)arsane | C18 H45 As O3 Si3 | 40.077 | 1000366-57-5 | LibSearch | 62.25 | Integrate | NIST17.L |

## Compound ID Table

| Name                                             | Formula       | ID Source | RT     | CAS          | Score |
|--------------------------------------------------|---------------|-----------|--------|--------------|-------|
| Tris(tert-butylidimethylsilyloxy)arsane          | C18H45AsO3Si3 | LibSearch | 40.077 | 1000366-57-5 | 62.25 |
| Arsenous acid, tris(trimethylsilyl) ester        | C9H27AsO3Si3  | LibSearch | 40.077 | 55429-29-3   | 60.49 |
| N,N-Dimethyl-4-nitroso-3-(trimethylsilyl)aniline | C11H18N2OSi   | LibSearch | 40.077 | 17993-84-9   | 52.23 |

## Structure

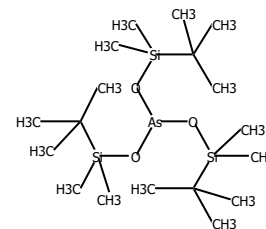

## Compound Spectra (overlaid)

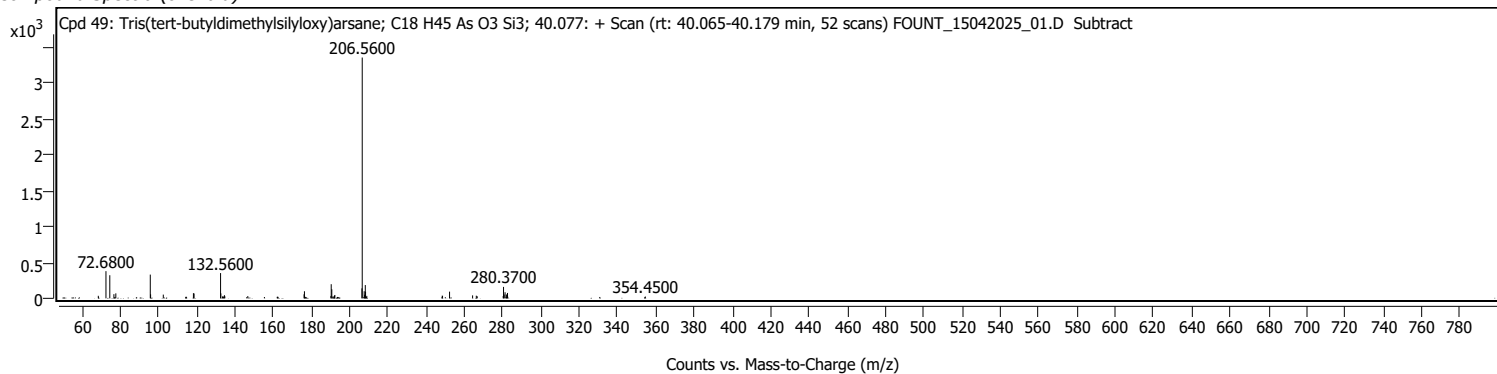

## Tris(tert-butylidimethylsilyloxy)arsane

| m/z (prec.) | Species | CE | Score (Lib) | Score (Fwd) | Score (Rev) | Lib/DB   |
|-------------|---------|----|-------------|-------------|-------------|----------|
|             |         |    | 62.25       |             |             | NIST17.L |

## Library Match Details

| m/z (prec.) | Species | CE | Score (Lib) | Score (Fwd) | Score (Rev) | Lib/DB   |
|-------------|---------|----|-------------|-------------|-------------|----------|
|             |         |    | 62.25       |             |             | NIST17.L |

## Observed Spectrum

# Compound Discovery Report

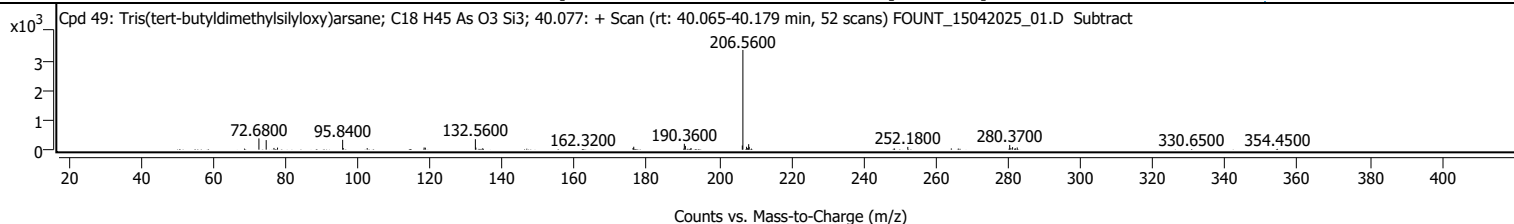

## Library Spectrum

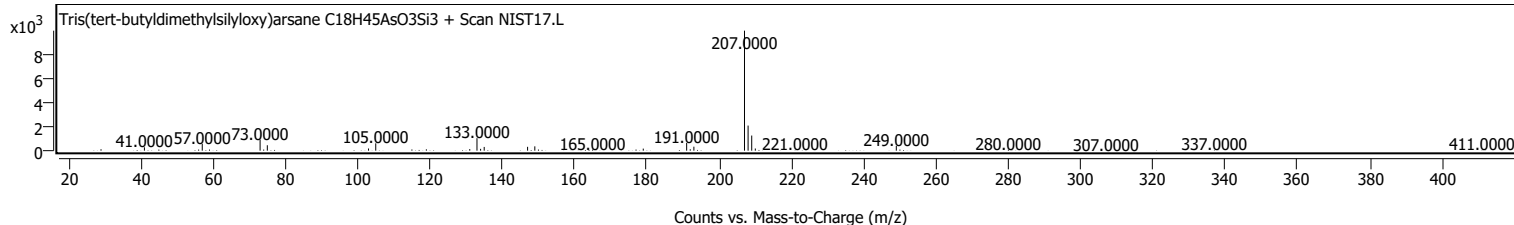

## Cpd. 50: Arsenous acid, tris(trimethylsilyl) ester

| Name                                      | Formula      | RT     | CAS        | ID Source | Score | Algorithm | Lib/DB   |
|-------------------------------------------|--------------|--------|------------|-----------|-------|-----------|----------|
| Arsenous acid, tris(trimethylsilyl) ester | C9H27AsO3Si3 | 40.236 | 55429-29-3 | LibSearch | 58.51 | Integrate | NIST17.L |

## Compound ID Table

| Name                                      | Formula       | ID Source | RT     | CAS          | Score |
|-------------------------------------------|---------------|-----------|--------|--------------|-------|
| Arsenous acid, tris(trimethylsilyl) ester | C9H27AsO3Si3  | LibSearch | 40.236 | 55429-29-3   | 58.51 |
| Tris(tert-butyl dimethylsilyloxy)arsane   | C18H45AsO3Si3 | LibSearch | 40.236 | 1000366-57-5 | 56.80 |
| Cyclotrisiloxane, hexamethyl-             | C6H18O3Si3    | LibSearch | 40.236 | 541-05-9     | 42.23 |

## Structure

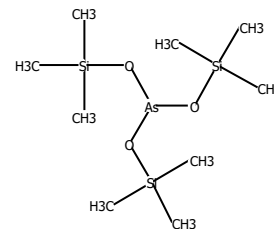

## Compound Spectra (overlaid)

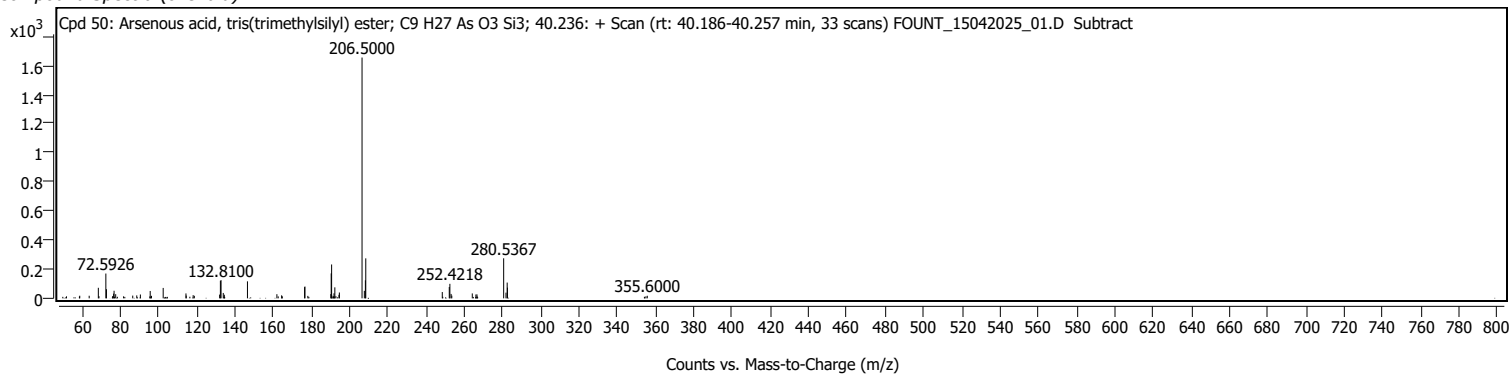

## Arsenous acid, tris(trimethylsilyl) ester

| m/z (prec.) | Species | CE | Score (Lib) | Score (Fwd) | Score (Rev) | Lib/DB   |
|-------------|---------|----|-------------|-------------|-------------|----------|
|             |         |    | 58.51       |             |             | NIST17.L |

## Library Match Details

| m/z (prec.) | Species | CE | Score (Lib) | Score (Fwd) | Score (Rev) | Lib/DB   |
|-------------|---------|----|-------------|-------------|-------------|----------|
|             |         |    | 58.51       |             |             | NIST17.L |

## Observed Spectrum

# Compound Discovery Report

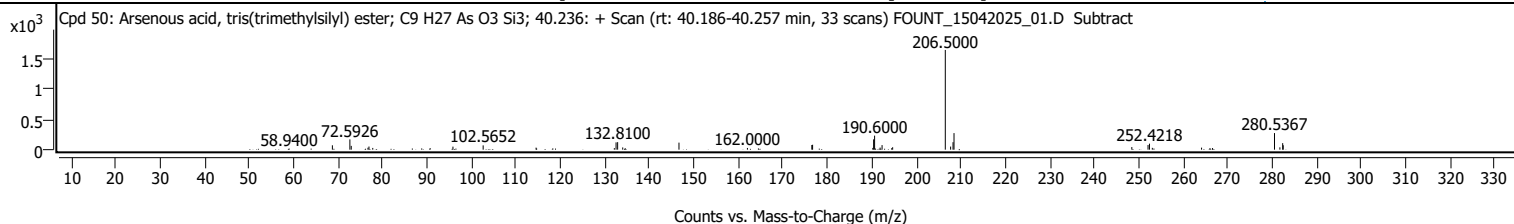

## Library Spectrum

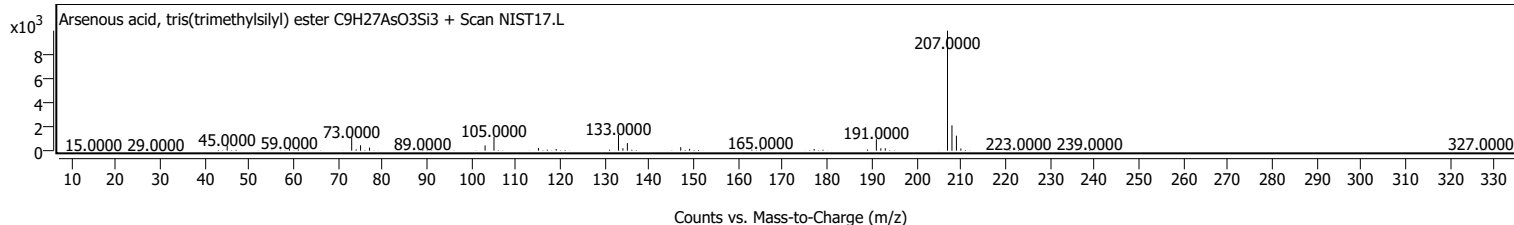

## Cpd. 51: Tris(tert-butyl)dimethylsilyloxy)arsane

| Name                                    | Formula           | RT     | CAS          | ID Source | Score | Algorithm | Lib/DB   |
|-----------------------------------------|-------------------|--------|--------------|-----------|-------|-----------|----------|
| Tris(tert-butyl)dimethylsilyloxy)arsane | C18 H45 As O3 Si3 | 40.364 | 1000366-57-5 | LibSearch | 56.84 | Integrate | NIST17.L |

## Compound ID Table

| Name                                      | Formula       | ID Source | RT     | CAS          | Score |
|-------------------------------------------|---------------|-----------|--------|--------------|-------|
| Tris(tert-butyl)dimethylsilyloxy)arsane   | C18H45AsO3Si3 | LibSearch | 40.364 | 1000366-57-5 | 56.84 |
| Arsenous acid, tris(trimethylsilyl) ester | C9H27AsO3Si3  | LibSearch | 40.364 | 55429-29-3   | 55.22 |
| Cyclotrisiloxane, hexamethyl-             | C6H18O3Si3    | LibSearch | 40.364 | 541-05-9     | 41.70 |

## Structure



## Compound Spectra (overlaid)

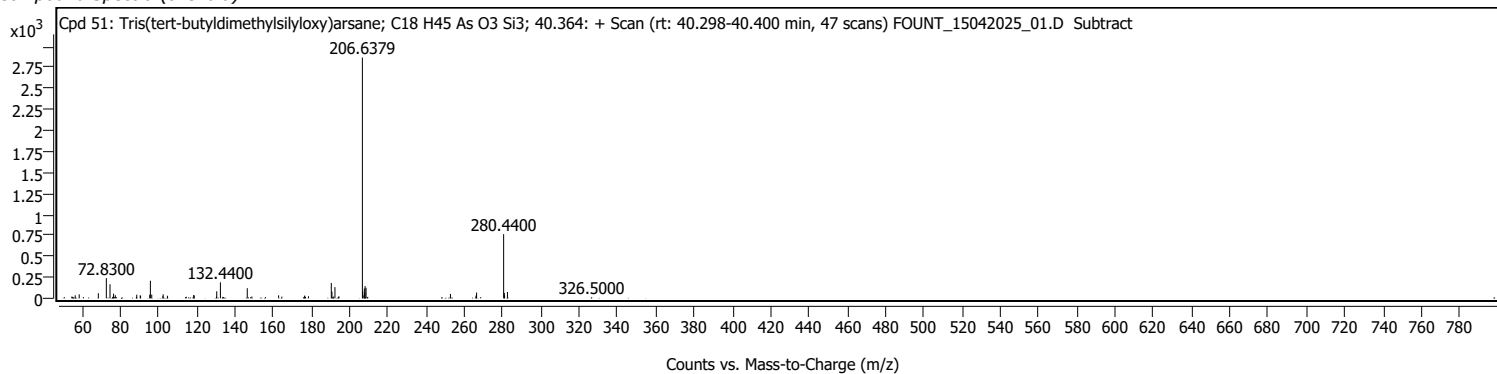

## Tris(tert-butyl)dimethylsilyloxy)arsane

| m/z (prec.) | Species | CE | Score (Lib) | Score (Fwd) | Score (Rev) | Lib/DB   |
|-------------|---------|----|-------------|-------------|-------------|----------|
|             |         |    | 56.84       |             |             | NIST17.L |

## Library Match Details

| m/z (prec.) | Species | CE | Score (Lib) | Score (Fwd) | Score (Rev) | Lib/DB   |
|-------------|---------|----|-------------|-------------|-------------|----------|
|             |         |    | 56.84       |             |             | NIST17.L |

## Observed Spectrum

# Compound Discovery Report

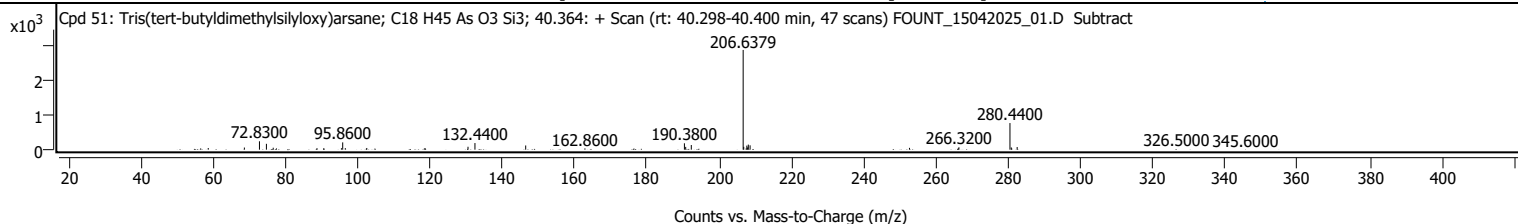

## Library Spectrum

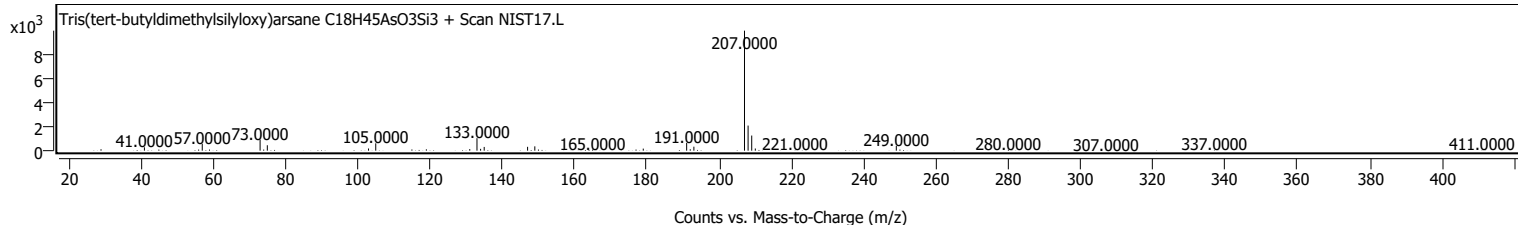

## Cpd. 52: Arsenous acid, tris(trimethylsilyl) ester

| Name                                      | Formula          | RT     | CAS        | ID Source | Score | Algorithm | Lib/DB   |
|-------------------------------------------|------------------|--------|------------|-----------|-------|-----------|----------|
| Arsenous acid, tris(trimethylsilyl) ester | C9 H27 As O3 Si3 | 40.540 | 55429-29-3 | LibSearch | 52.44 | Integrate | NIST17.L |

## Compound ID Table

| Name                                                        | Formula       | ID Source | RT     | CAS          | Score |
|-------------------------------------------------------------|---------------|-----------|--------|--------------|-------|
| Arsenous acid, tris(trimethylsilyl) ester                   | C9H27AsO3Si3  | LibSearch | 40.540 | 55429-29-3   | 52.44 |
| Tris(tert-butyl dimethylsilyloxy)arsane                     | C18H45AsO3Si3 | LibSearch | 40.540 | 1000366-57-5 | 51.94 |
| Caprolactone oxime, (NB)-O-[(diethylboryloxy)(ethyl)boryl]- | C12H25B2NO2   | LibSearch | 40.540 | 1000161-37-6 | 47.89 |

## Structure

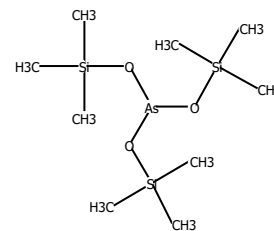

## Compound Spectra (overlaid)

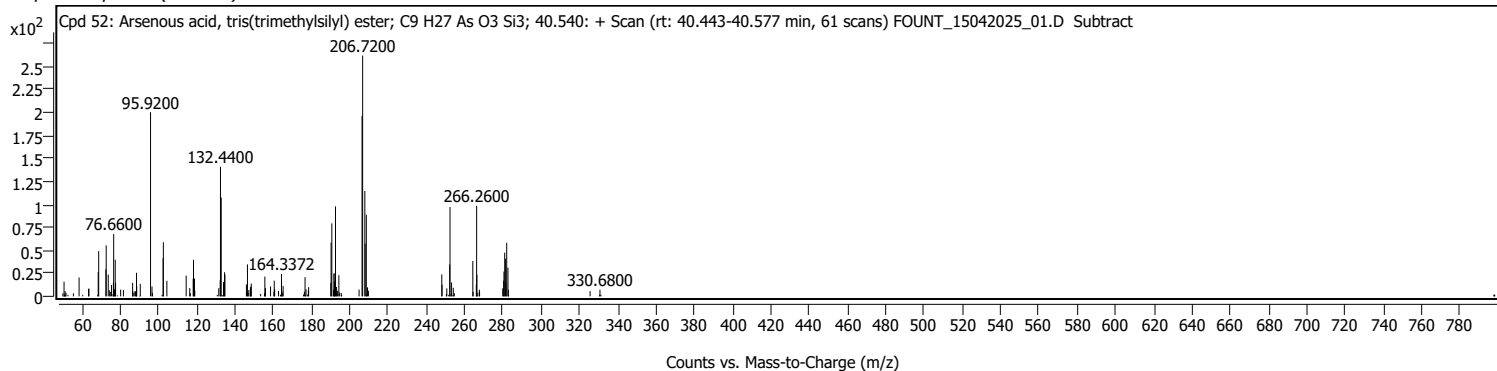

## Arsenous acid, tris(trimethylsilyl) ester

| m/z (prec.) | Species | CE | Score (Lib) | Score (Fwd) | Score (Rev) | Lib/DB   |
|-------------|---------|----|-------------|-------------|-------------|----------|
|             |         |    | 52.44       |             |             | NIST17.L |

## Library Match Details

| m/z (prec.) | Species | CE | Score (Lib) | Score (Fwd) | Score (Rev) | Lib/DB   |
|-------------|---------|----|-------------|-------------|-------------|----------|
|             |         |    | 52.44       |             |             | NIST17.L |

## Observed Spectrum

# Compound Discovery Report

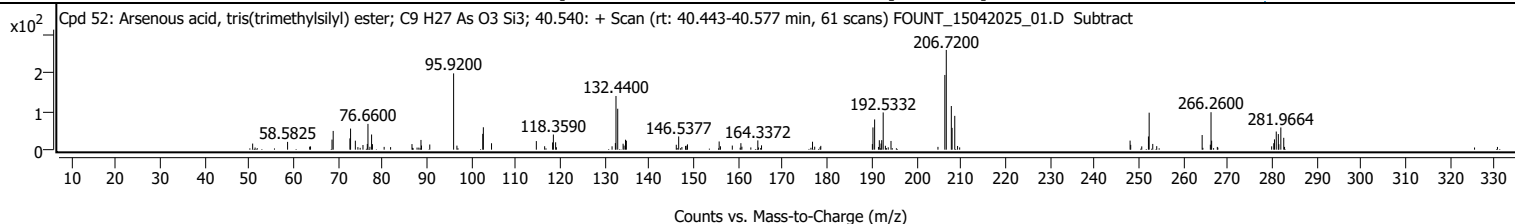

## Library Spectrum

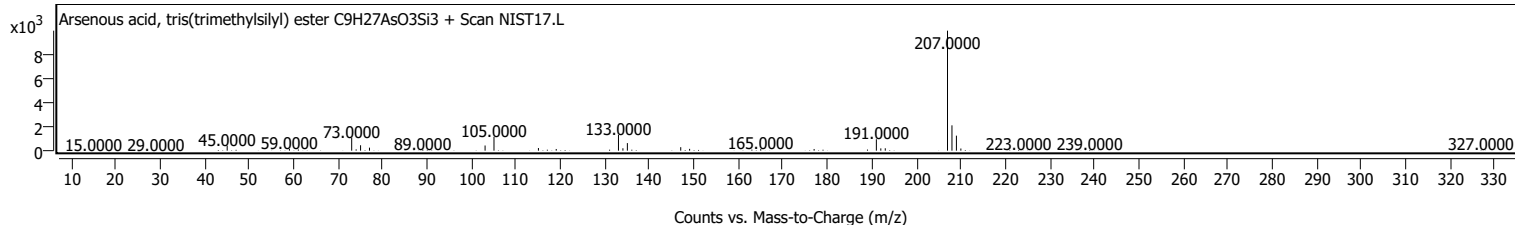

## Cpd. 53: Tris(tert-butylidimethylsilyloxy)arsane

| Name                                    | Formula           | RT     | CAS          | ID Source | Score | Algorithm | Lib/DB   |
|-----------------------------------------|-------------------|--------|--------------|-----------|-------|-----------|----------|
| Tris(tert-butylidimethylsilyloxy)arsane | C18 H45 As O3 Si3 | 40.765 | 1000366-57-5 | LibSearch | 48.06 | Integrate | NIST17.L |

## Compound ID Table

| Name                                             | Formula       | ID Source | RT     | CAS          | Score |
|--------------------------------------------------|---------------|-----------|--------|--------------|-------|
| Tris(tert-butylidimethylsilyloxy)arsane          | C18H45AsO3Si3 | LibSearch | 40.765 | 1000366-57-5 | 48.06 |
| N,N-Dimethyl-4-nitroso-3-(trimethylsilyl)aniline | C11H18N2OSi   | LibSearch | 40.765 | 17993-84-9   | 46.51 |
| Arsenous acid, tris(trimethylsilyl) ester        | C9H27AsO3Si3  | LibSearch | 40.765 | 55429-29-3   | 46.50 |

## Structure

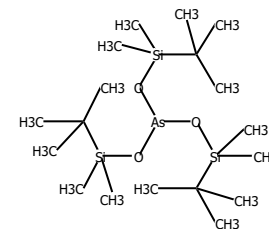

## Compound Spectra (overlaid)

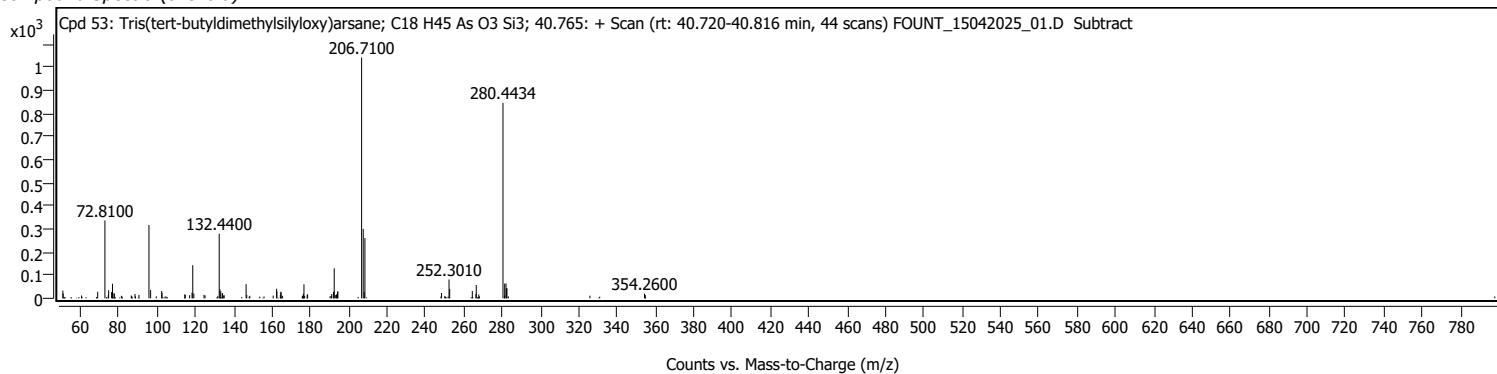

## Tris(tert-butylidimethylsilyloxy)arsane

| m/z (prec.) | Species | CE | Score (Lib) | Score (Fwd) | Score (Rev) | Lib/DB   |
|-------------|---------|----|-------------|-------------|-------------|----------|
|             |         |    | 48.06       |             |             | NIST17.L |

## Library Match Details

| m/z (prec.) | Species | CE | Score (Lib) | Score (Fwd) | Score (Rev) | Lib/DB   |
|-------------|---------|----|-------------|-------------|-------------|----------|
|             |         |    | 48.06       |             |             | NIST17.L |

## Observed Spectrum

# Compound Discovery Report

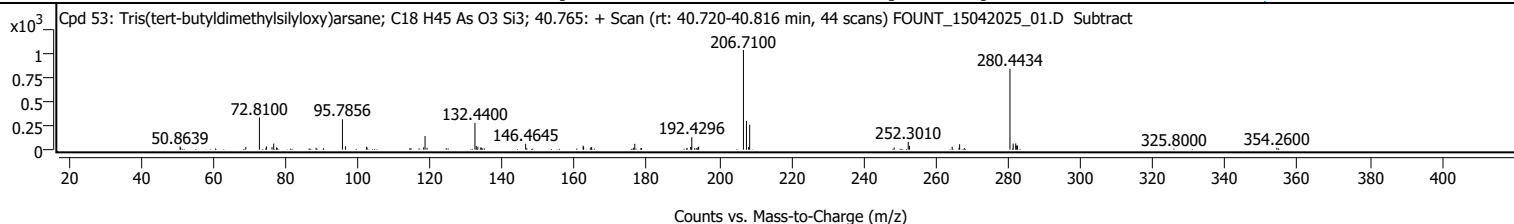

## Library Spectrum

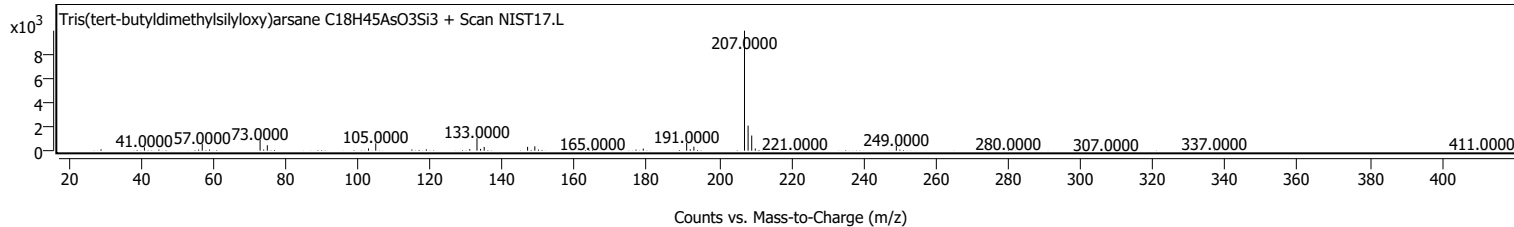

## Cpd. 54: Arsenous acid, tris(trimethylsilyl) ester

| Name                                      | Formula          | RT     | CAS        | ID Source | Score | Algorithm | Lib/DB   |
|-------------------------------------------|------------------|--------|------------|-----------|-------|-----------|----------|
| Arsenous acid, tris(trimethylsilyl) ester | C9 H27 As O3 Si3 | 41.088 | 55429-29-3 | LibSearch | 56.33 | Integrate | NIST17.L |

## Compound ID Table

| Name                                                        | Formula       | ID Source | RT     | CAS          | Score |
|-------------------------------------------------------------|---------------|-----------|--------|--------------|-------|
| Arsenous acid, tris(trimethylsilyl) ester                   | C9H27AsO3Si3  | LibSearch | 41.088 | 55429-29-3   | 56.33 |
| Tris(tert-butyl dimethylsilyloxy)arsane                     | C18H45AsO3Si3 | LibSearch | 41.088 | 1000366-57-5 | 55.03 |
| Caprolactone oxime, (NB)-O-[(diethylboryloxy)(ethyl)boryl]- | C12H25B2NO2   | LibSearch | 41.088 | 1000161-37-6 | 49.00 |

## Structure



## Compound Spectra (overlaid)

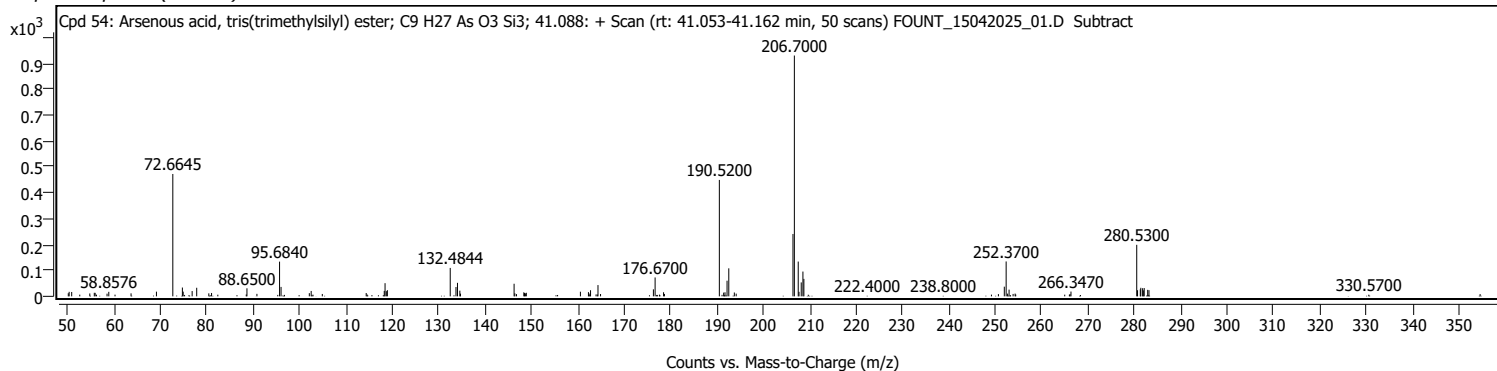

## Arsenous acid, tris(trimethylsilyl) ester

| m/z (prec.) | Species | CE | Score (Lib) | Score (Fwd) | Score (Rev) | Lib/DB   |
|-------------|---------|----|-------------|-------------|-------------|----------|
|             |         |    | 56.33       |             |             | NIST17.L |

## Library Match Details

| m/z (prec.) | Species | CE | Score (Lib) | Score (Fwd) | Score (Rev) | Lib/DB   |
|-------------|---------|----|-------------|-------------|-------------|----------|
|             |         |    | 56.33       |             |             | NIST17.L |

## Observed Spectrum

# Compound Discovery Report

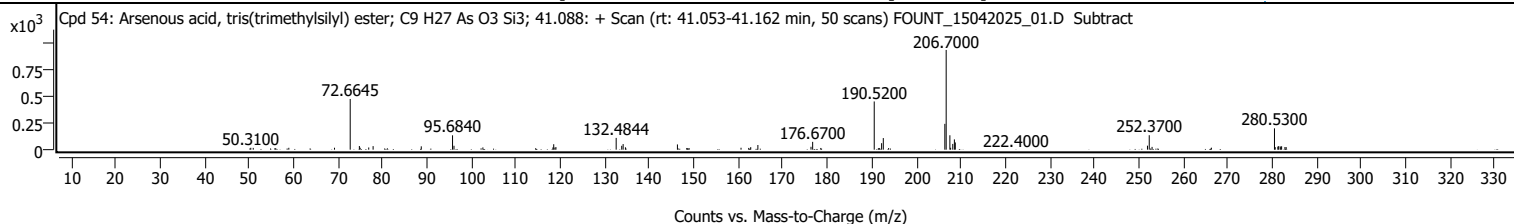

## Library Spectrum



## Cpd. 55: 1-Isopropoxy-5-propyl-2,3-bis-trimethylsilyl-1,2-dihydroborinine

| Name                                                             | Formula         | RT     | CAS          | ID Source | Score | Algorithm | Lib/DB   |
|------------------------------------------------------------------|-----------------|--------|--------------|-----------|-------|-----------|----------|
| 1-Isopropoxy-5-propyl-2,3-bis-trimethylsilyl-1,2-dihydroborinine | C17 H35 B O Si2 | 41.234 | 1000306-53-9 | LibSearch | 39.74 | Integrate | NIST17.L |

## Compound ID Table

| Name                                                             | Formula     | ID Source | RT     | CAS          | Score |
|------------------------------------------------------------------|-------------|-----------|--------|--------------|-------|
| 1-Isopropoxy-5-propyl-2,3-bis-trimethylsilyl-1,2-dihydroborinine | C17H35BOSi2 | LibSearch | 41.234 | 1000306-53-9 | 39.74 |
| 3-(4-Hydroxyphenyl)-1-propanol, 2TMS derivative                  | C15H28O2Si2 | LibSearch | 41.234 | 1000079-07-4 | 38.38 |
| Cobalt, bis(ethene)-eta.-5-(ethyltetramethylcyclopentadienyl)-   | C15H25Co    | LibSearch | 41.234 | 1000163-93-4 | 34.97 |

## Structure

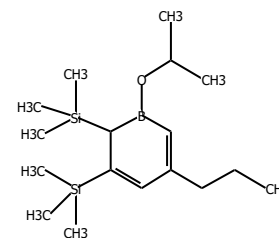

## Compound Spectra (overlaid)

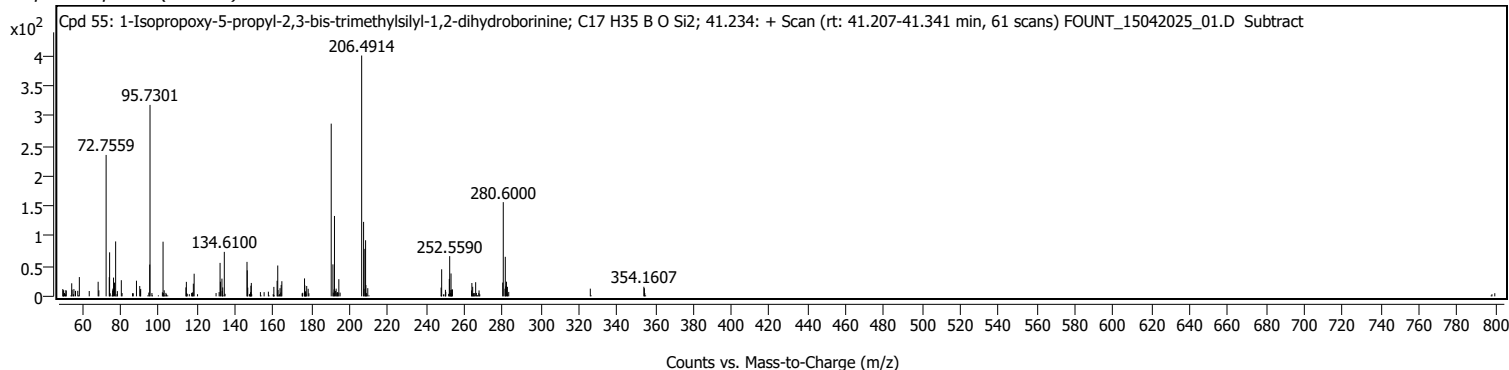

## 1-Isopropoxy-5-propyl-2,3-bis-trimethylsilyl-1,2-dihydroborinine

| m/z (prec.) | Species | CE | Score (Lib) | Score (Fwd) | Score (Rev) | Lib/DB   |
|-------------|---------|----|-------------|-------------|-------------|----------|
|             |         |    | 39.74       |             |             | NIST17.L |

## Library Match Details

| m/z (prec.) | Species | CE | Score (Lib) | Score (Fwd) | Score (Rev) | Lib/DB   |
|-------------|---------|----|-------------|-------------|-------------|----------|
|             |         |    | 39.74       |             |             | NIST17.L |

## Observed Spectrum

# Compound Discovery Report

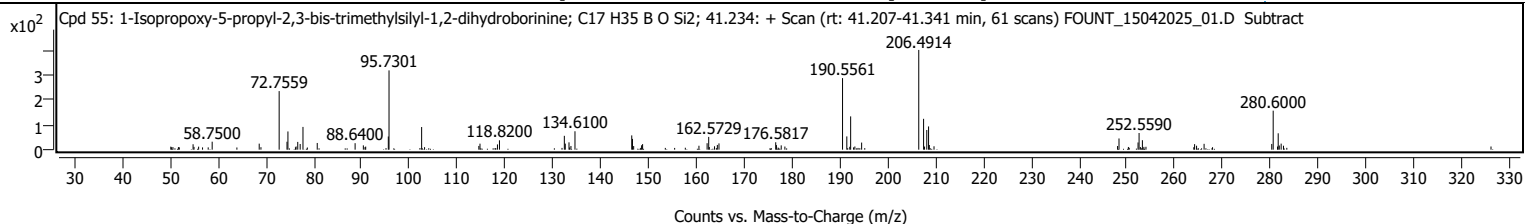

## Library Spectrum

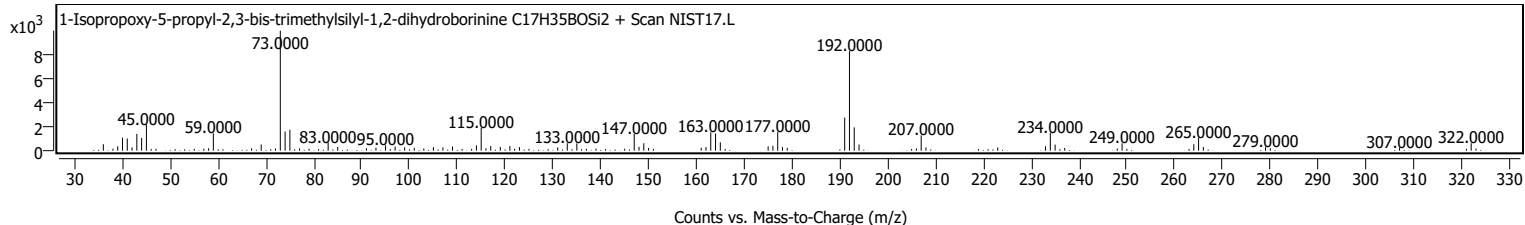

## Cpd. 56: Arsenous acid, tris(trimethylsilyl) ester

| Name                                      | Formula                                                          | RT     | CAS        | ID Source | Score | Algorithm | Lib/DB   |
|-------------------------------------------|------------------------------------------------------------------|--------|------------|-----------|-------|-----------|----------|
| Arsenous acid, tris(trimethylsilyl) ester | C <sub>9</sub> H <sub>27</sub> As O <sub>3</sub> Si <sub>3</sub> | 41.412 | 55429-29-3 | LibSearch | 52.82 | Integrate | NIST17.L |

## Compound ID Table

| Name                                      | Formula                                                          | ID Source | RT     | CAS          | Score |
|-------------------------------------------|------------------------------------------------------------------|-----------|--------|--------------|-------|
| Arsenous acid, tris(trimethylsilyl) ester | C <sub>9</sub> H <sub>27</sub> AsO <sub>3</sub> Si <sub>3</sub>  | LibSearch | 41.412 | 55429-29-3   | 52.82 |
| Tris(tert-butyl)dimethylsilyloxy)arsane   | C <sub>18</sub> H <sub>45</sub> AsO <sub>3</sub> Si <sub>3</sub> | LibSearch | 41.412 | 1000366-57-5 | 52.35 |
| Cyclotrisiloxane, hexamethyl-             | C <sub>6</sub> H <sub>18</sub> O <sub>3</sub> Si <sub>3</sub>    | LibSearch | 41.412 | 541-05-9     | 36.38 |

## Structure



## Compound Spectra (overlaid)

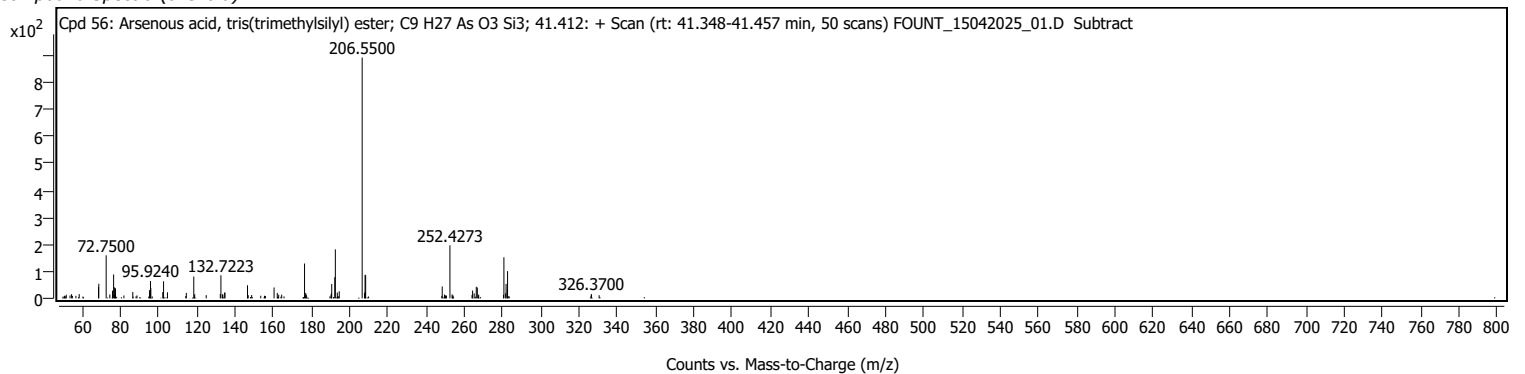

## Arsenous acid, tris(trimethylsilyl) ester

| m/z (prec.) | Species | CE | Score (Lib) | Score (Fwd) | Score (Rev) | Lib/DB   |
|-------------|---------|----|-------------|-------------|-------------|----------|
|             |         |    | 52.82       |             |             | NIST17.L |

## Library Match Details

| m/z (prec.) | Species | CE | Score (Lib) | Score (Fwd) | Score (Rev) | Lib/DB   |
|-------------|---------|----|-------------|-------------|-------------|----------|
|             |         |    | 52.82       |             |             | NIST17.L |

## Observed Spectrum

# Compound Discovery Report

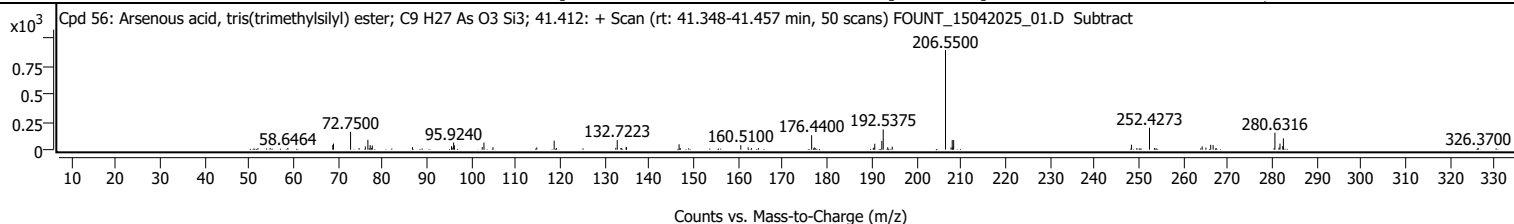

## Library Spectrum



## Cpd. 57: Tris(tert-butyl)dimethylsilyloxy)arsane

| Name                                    | Formula           | RT     | CAS          | ID Source | Score | Algorithm | Lib/DB   |
|-----------------------------------------|-------------------|--------|--------------|-----------|-------|-----------|----------|
| Tris(tert-butyl)dimethylsilyloxy)arsane | C18 H45 As O3 Si3 | 42.511 | 1000366-57-5 | LibSearch | 61.34 | Integrate | NIST17.L |

## Compound ID Table

| Name                                             | Formula       | ID Source | RT     | CAS          | Score |
|--------------------------------------------------|---------------|-----------|--------|--------------|-------|
| Tris(tert-butyl)dimethylsilyloxy)arsane          | C18H45AsO3Si3 | LibSearch | 42.511 | 1000366-57-5 | 61.34 |
| Arsenous acid, tris(trimethylsilyl) ester        | C9H27AsO3Si3  | LibSearch | 42.511 | 55429-29-3   | 56.78 |
| N,N-Dimethyl-4-nitroso-3-(trimethylsilyl)aniline | C11H18N2OSi   | LibSearch | 42.511 | 17993-84-9   | 52.47 |

## Structure



## Compound Spectra (overlaid)

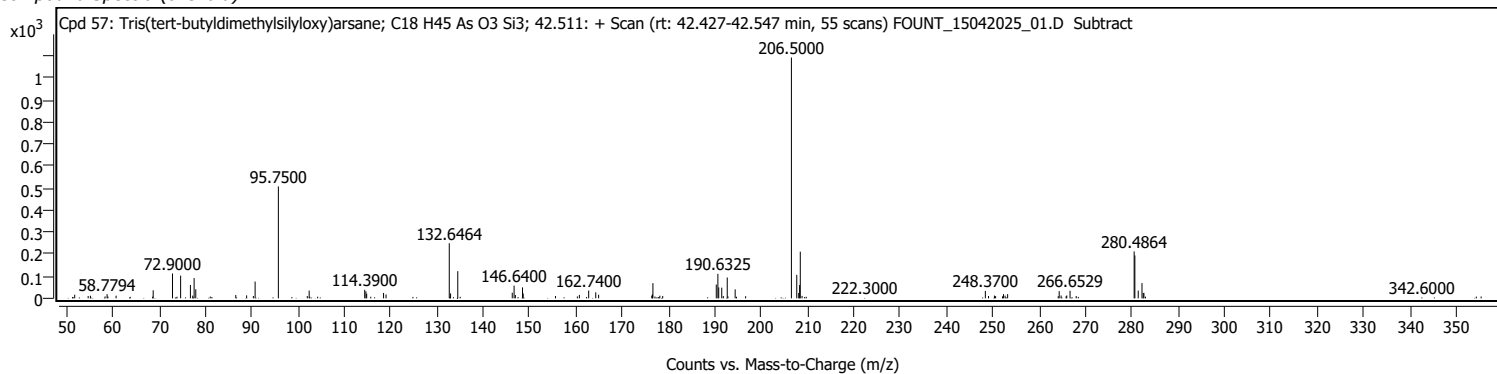

## Tris(tert-butyl)dimethylsilyloxy)arsane

| m/z (prec.) | Species | CE | Score (Lib) | Score (Fwd) | Score (Rev) | Lib/DB   |
|-------------|---------|----|-------------|-------------|-------------|----------|
|             |         |    | 61.34       |             |             | NIST17.L |

## Library Match Details

| m/z (prec.) | Species | CE | Score (Lib) | Score (Fwd) | Score (Rev) | Lib/DB   |
|-------------|---------|----|-------------|-------------|-------------|----------|
|             |         |    | 61.34       |             |             | NIST17.L |

## Observed Spectrum

# Compound Discovery Report

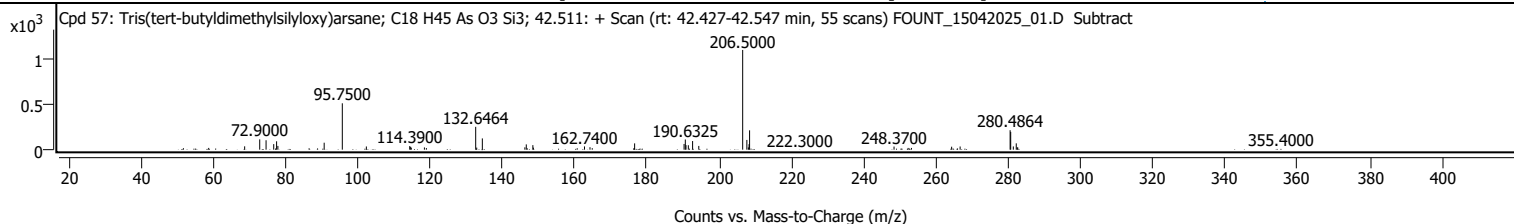

## Library Spectrum



## Cpd. 58: Tris(tert-butyltrimethylsilyloxy)arsane

| Name                                    | Formula           | RT     | CAS          | ID Source | Score | Algorithm | Lib/DB   |
|-----------------------------------------|-------------------|--------|--------------|-----------|-------|-----------|----------|
| Tris(tert-butyltrimethylsilyloxy)arsane | C18 H45 As O3 Si3 | 42.858 | 1000366-57-5 | LibSearch | 49.20 | Integrate | NIST17.L |

## Compound ID Table

| Name                                          | Formula       | ID Source | RT     | CAS          | Score |
|-----------------------------------------------|---------------|-----------|--------|--------------|-------|
| Tris(tert-butyltrimethylsilyloxy)arsane       | C18H45AsO3Si3 | LibSearch | 42.858 | 1000366-57-5 | 49.20 |
| Arsenous acid, tris(trimethylsilyl) ester     | C9H27AsO3Si3  | LibSearch | 42.858 | 55429-29-3   | 48.88 |
| 4-Pyridinol-3,5-dichloro-2,6-dimethyl-1-oxide | C7H7Cl2NO2    | LibSearch | 42.858 | 1000252-90-7 | 35.04 |

## Structure



## Compound Spectra (overlaid)

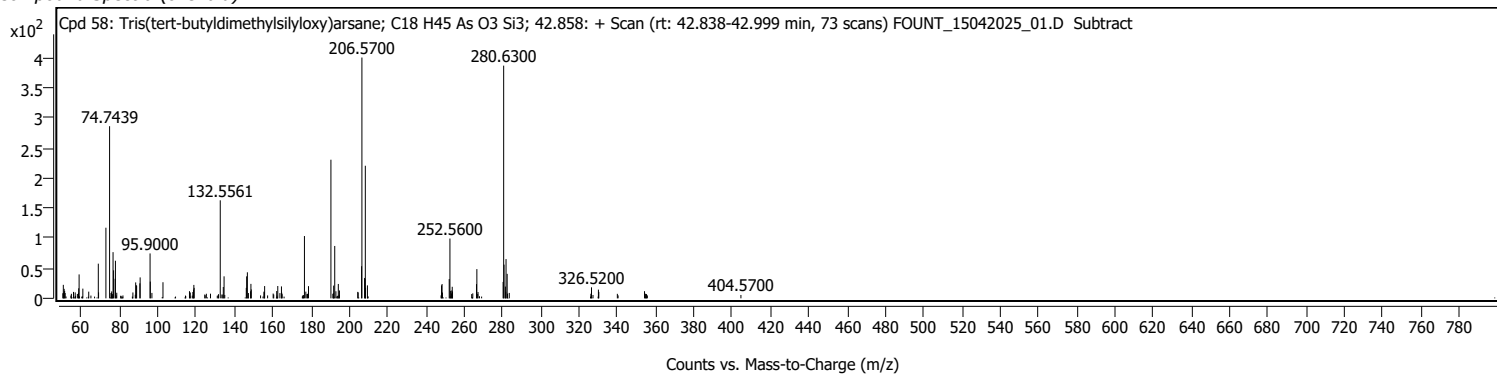

## Tris(tert-butyltrimethylsilyloxy)arsane

| m/z (prec.) | Species | CE | Score (Lib) | Score (Fwd) | Score (Rev) | Lib/DB   |
|-------------|---------|----|-------------|-------------|-------------|----------|
|             |         |    | 49.20       |             |             | NIST17.L |

## Library Match Details

| m/z (prec.) | Species | CE | Score (Lib) | Score (Fwd) | Score (Rev) | Lib/DB   |
|-------------|---------|----|-------------|-------------|-------------|----------|
|             |         |    | 49.20       |             |             | NIST17.L |

## Observed Spectrum

# Compound Discovery Report

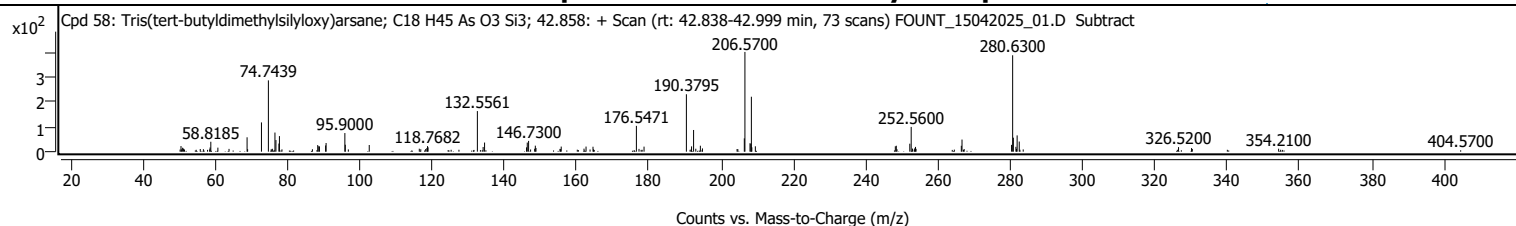

## Library Spectrum

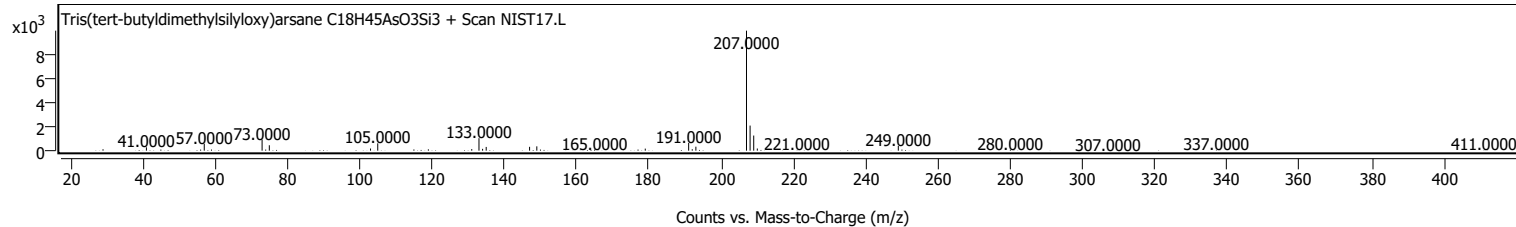

## Cpd. 59: Tris(tert-butyl dimethylsilyloxy)arsane

| Name                                    | Formula       | RT     | CAS          | ID Source | Score | Algorithm | Lib/DB   |
|-----------------------------------------|---------------|--------|--------------|-----------|-------|-----------|----------|
| Tris(tert-butyl dimethylsilyloxy)arsane | C18H45AsO3Si3 | 43.069 | 1000366-57-5 | LibSearch | 50.97 | Integrate | NIST17.L |

## Compound ID Table

| Name                                                        | Formula       | ID Source | RT     | CAS          | Score |
|-------------------------------------------------------------|---------------|-----------|--------|--------------|-------|
| Tris(tert-butyl dimethylsilyloxy)arsane                     | C18H45AsO3Si3 | LibSearch | 43.069 | 1000366-57-5 | 50.97 |
| N,N-Dimethyl-4-nitroso-3-(trimethylsilyl)aniline            | C11H18N2OSi   | LibSearch | 43.069 | 17993-84-9   | 43.55 |
| Caprolactone oxime, (NB)-O-[(diethylboryloxy)(ethyl)boryl]- | C12H25B2NO2   | LibSearch | 43.069 | 1000161-37-6 | 41.19 |

## Structure

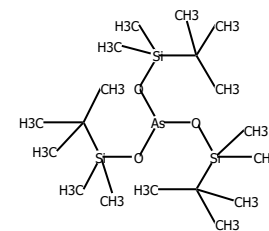

## Compound Spectra (overlaid)

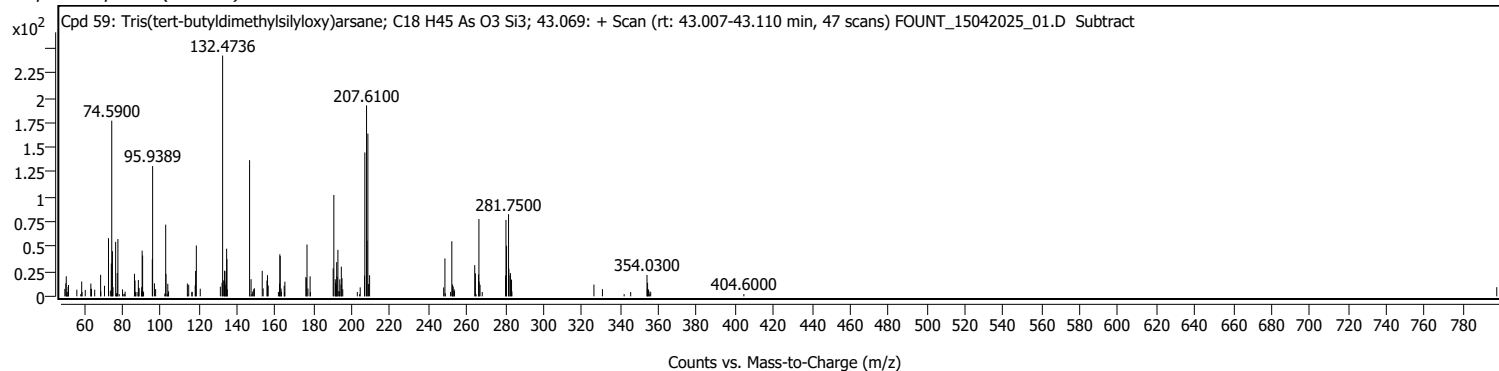

## Tris(tert-butyl dimethylsilyloxy)arsane

| m/z (prec.) | Species | CE | Score (Lib) | Score (Fwd) | Score (Rev) | Lib/DB   |
|-------------|---------|----|-------------|-------------|-------------|----------|
|             |         |    | 50.97       |             |             | NIST17.L |

## Library Match Details

| m/z (prec.) | Species | CE | Score (Lib) | Score (Fwd) | Score (Rev) | Lib/DB   |
|-------------|---------|----|-------------|-------------|-------------|----------|
|             |         |    | 50.97       |             |             | NIST17.L |

## Observed Spectrum

# Compound Discovery Report

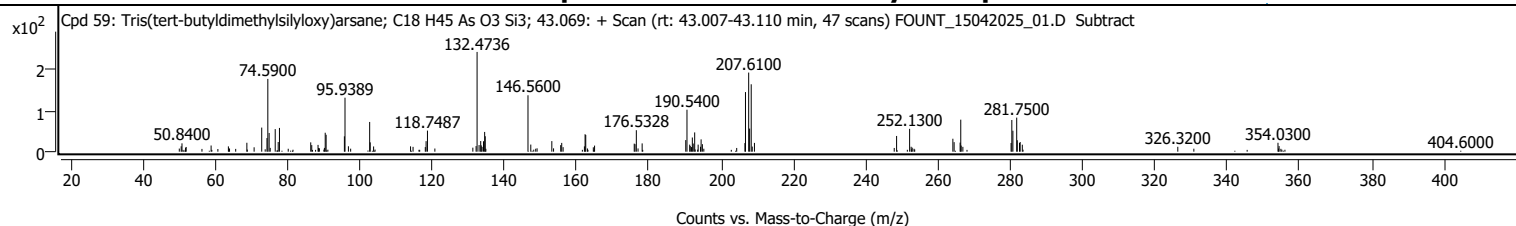

## Library Spectrum



## Cpd. 60: Tris(tert-butyl dimethylsilyloxy)arsane

| Name                                    | Formula       | RT     | CAS          | ID Source | Score | Algorithm | Lib/DB   |
|-----------------------------------------|---------------|--------|--------------|-----------|-------|-----------|----------|
| Tris(tert-butyl dimethylsilyloxy)arsane | C18H45AsO3Si3 | 43.309 | 1000366-57-5 | LibSearch | 54.11 | Integrate | NIST17.L |

## Compound ID Table

| Name                                                        | Formula       | ID Source | RT     | CAS          | Score |
|-------------------------------------------------------------|---------------|-----------|--------|--------------|-------|
| Tris(tert-butyl dimethylsilyloxy)arsane                     | C18H45AsO3Si3 | LibSearch | 43.309 | 1000366-57-5 | 54.11 |
| Arsenous acid, tris(trimethylsilyl) ester                   | C9H27AsO3Si3  | LibSearch | 43.309 | 55429-29-3   | 51.29 |
| Caprolactone oxime, (NB)-O-[(diethylboryloxy)(ethyl)boryl]- | C12H25B2NO2   | LibSearch | 43.309 | 1000161-37-6 | 47.86 |

## Structure

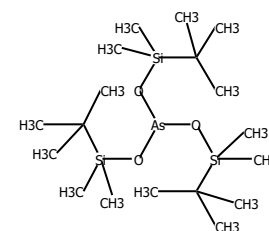

## Compound Spectra (overlaid)

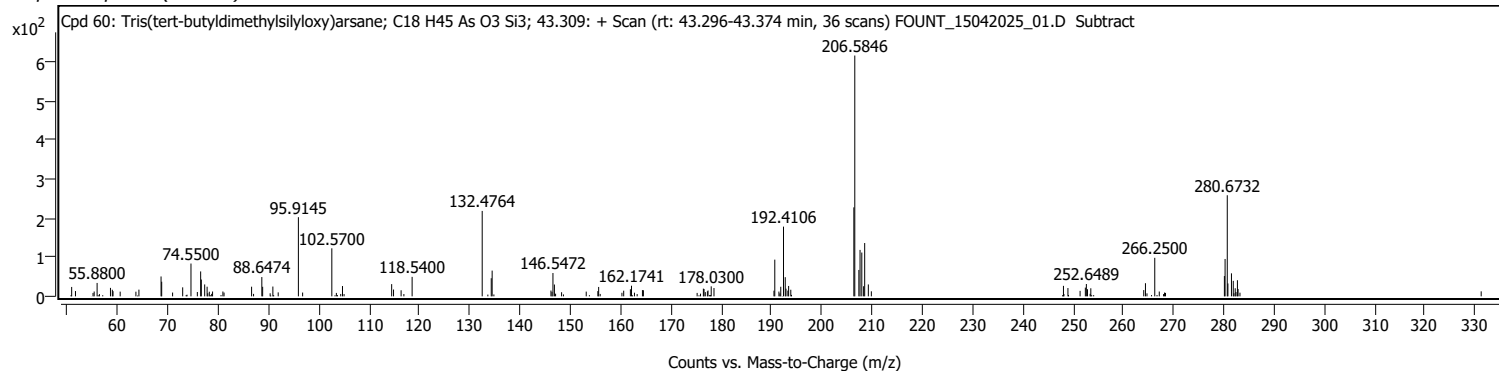

## Tris(tert-butyl dimethylsilyloxy)arsane

| m/z (prec.) | Species | CE | Score (Lib) | Score (Fwd) | Score (Rev) | Lib/DB   |
|-------------|---------|----|-------------|-------------|-------------|----------|
|             |         |    | 54.11       |             |             | NIST17.L |

## Library Match Details

| m/z (prec.) | Species | CE | Score (Lib) | Score (Fwd) | Score (Rev) | Lib/DB   |
|-------------|---------|----|-------------|-------------|-------------|----------|
|             |         |    | 54.11       |             |             | NIST17.L |

## Observed Spectrum

# Compound Discovery Report

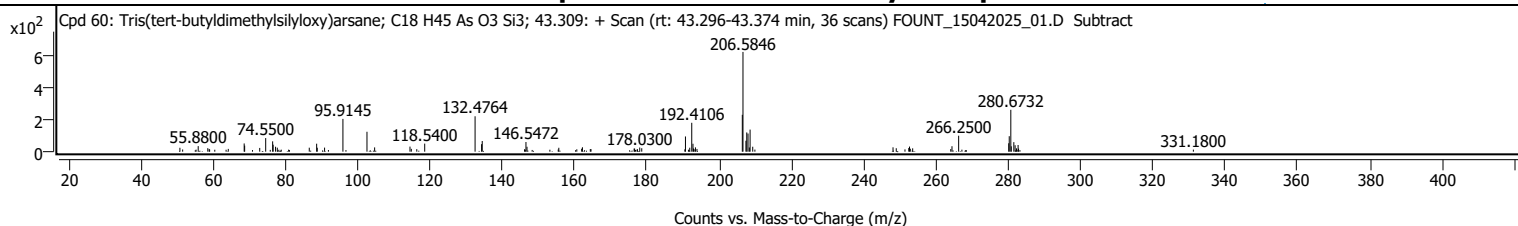

## Library Spectrum

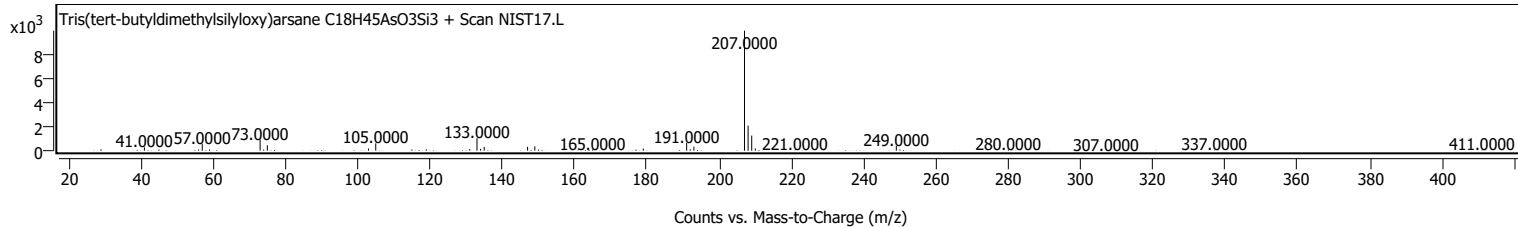

## Cpd. 61: Tris(tert-butyl dimethylsilyloxy)arsane

| Name                                    | Formula           | RT     | CAS          | ID Source | Score | Algorithm | Lib/DB   |
|-----------------------------------------|-------------------|--------|--------------|-----------|-------|-----------|----------|
| Tris(tert-butyl dimethylsilyloxy)arsane | C18 H45 As O3 Si3 | 43.453 | 1000366-57-5 | LibSearch | 55.40 | Integrate | NIST17.L |

## Compound ID Table

| Name                                                                   | Formula       | ID Source | RT     | CAS          | Score |
|------------------------------------------------------------------------|---------------|-----------|--------|--------------|-------|
| Tris(tert-butyl dimethylsilyloxy)arsane                                | C18H45AsO3Si3 | LibSearch | 43.453 | 1000366-57-5 | 55.40 |
| Arsenous acid, tris(trimethylsilyl) ester                              | C9H27AsO3Si3  | LibSearch | 43.453 | 55429-29-3   | 53.99 |
| 4,4'-bi-4H-pyran, 2,2',6,6'-tetrakis(1,1-dimethylethyl)-4,4'-dimethyl- | C28H46O2      | LibSearch | 43.453 | 1000399-10-0 | 47.18 |

## Structure

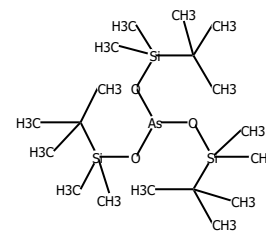

## Compound Spectra (overlaid)

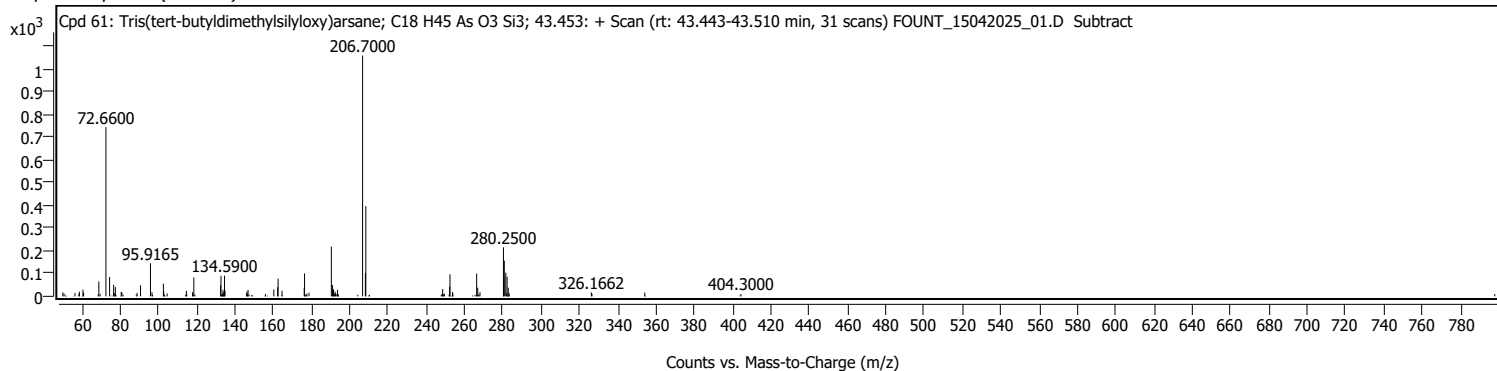

## Tris(tert-butyl dimethylsilyloxy)arsane

| m/z (prec.) | Species | CE | Score (Lib) | Score (Fwd) | Score (Rev) | Lib/DB   |
|-------------|---------|----|-------------|-------------|-------------|----------|
|             |         |    | 55.40       |             |             | NIST17.L |

## Library Match Details

| m/z (prec.) | Species | CE | Score (Lib) | Score (Fwd) | Score (Rev) | Lib/DB   |
|-------------|---------|----|-------------|-------------|-------------|----------|
|             |         |    | 55.40       |             |             | NIST17.L |

## Observed Spectrum

# Compound Discovery Report

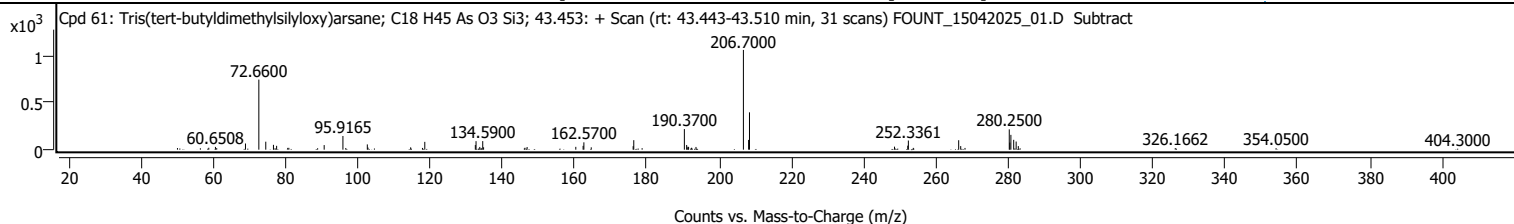

## Library Spectrum



## Cpd. 62: Tris(tert-butyl dimethylsilyloxy)arsane

| Name                                    | Formula       | RT     | CAS          | ID Source | Score | Algorithm | Lib/DB   |
|-----------------------------------------|---------------|--------|--------------|-----------|-------|-----------|----------|
| Tris(tert-butyl dimethylsilyloxy)arsane | C18H45AsO3Si3 | 43.815 | 1000366-57-5 | LibSearch | 53.86 | Integrate | NIST17.L |

## Compound ID Table

| Name                                             | Formula       | ID Source | RT     | CAS          | Score |
|--------------------------------------------------|---------------|-----------|--------|--------------|-------|
| Tris(tert-butyl dimethylsilyloxy)arsane          | C18H45AsO3Si3 | LibSearch | 43.815 | 1000366-57-5 | 53.86 |
| Arsenous acid, tris(trimethylsilyl) ester        | C9H27AsO3Si3  | LibSearch | 43.815 | 55429-29-3   | 53.32 |
| N,N-Dimethyl-4-nitroso-3-(trimethylsilyl)aniline | C11H18N2OSi   | LibSearch | 43.815 | 17993-84-9   | 50.30 |

## Structure



## Compound Spectra (overlaid)

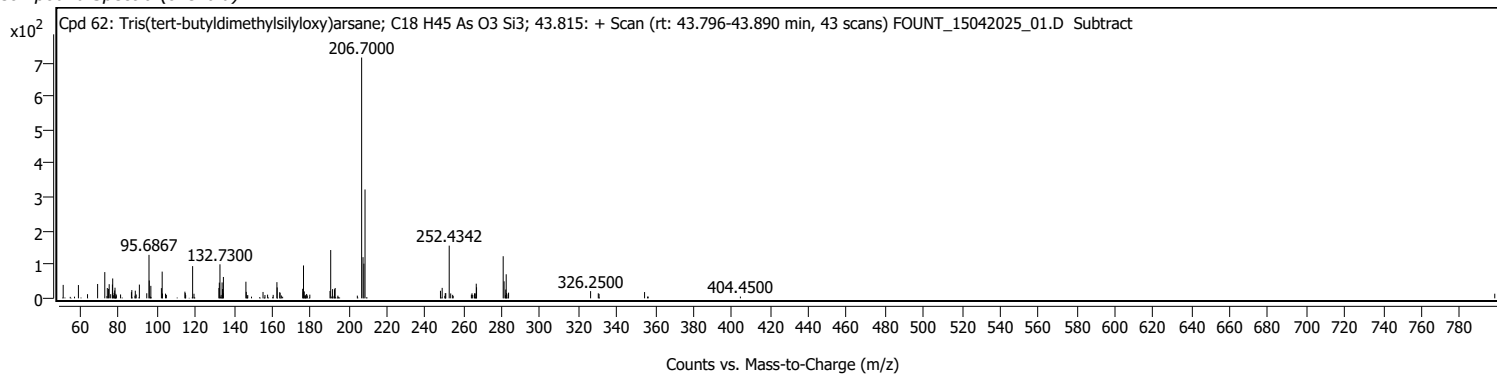

## Tris(tert-butyl dimethylsilyloxy)arsane

| m/z (prec.) | Species | CE | Score (Lib) | Score (Fwd) | Score (Rev) | Lib/DB   |
|-------------|---------|----|-------------|-------------|-------------|----------|
|             |         |    | 53.86       |             |             | NIST17.L |

## Library Match Details

| m/z (prec.) | Species | CE | Score (Lib) | Score (Fwd) | Score (Rev) | Lib/DB   |
|-------------|---------|----|-------------|-------------|-------------|----------|
|             |         |    | 53.86       |             |             | NIST17.L |

## Observed Spectrum

# Compound Discovery Report

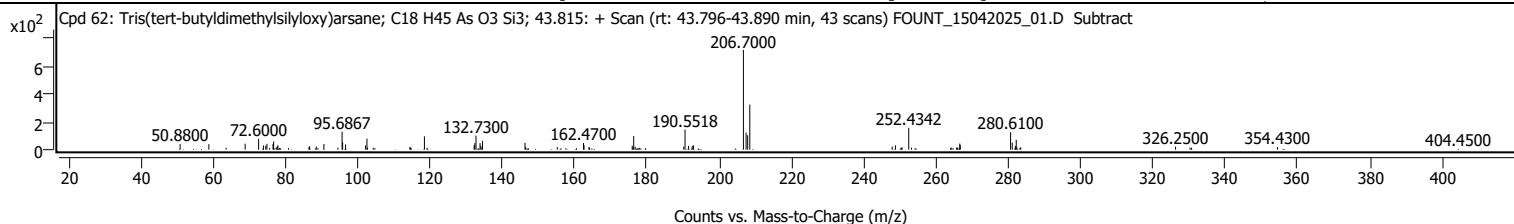

## Library Spectrum



## Cpd. 63: Tris(tert-butyl dimethylsilyloxy)arsane

| Name                                    | Formula       | RT     | CAS          | ID Source | Score | Algorithm | Lib/DB   |
|-----------------------------------------|---------------|--------|--------------|-----------|-------|-----------|----------|
| Tris(tert-butyl dimethylsilyloxy)arsane | C18H45AsO3Si3 | 43.997 | 1000366-57-5 | LibSearch | 51.32 | Integrate | NIST17.L |

## Compound ID Table

| Name                                      | Formula       | ID Source | RT     | CAS          | Score |
|-------------------------------------------|---------------|-----------|--------|--------------|-------|
| Tris(tert-butyl dimethylsilyloxy)arsane   | C18H45AsO3Si3 | LibSearch | 43.997 | 1000366-57-5 | 51.32 |
| Arsenous acid, tris(trimethylsilyl) ester | C9H27AsO3Si3  | LibSearch | 43.997 | 55429-29-3   | 49.34 |
| Cyclotetrasiloxane, octamethyl-           | C8H24O4Si4    | LibSearch | 43.997 | 556-67-2     | 40.97 |

## Structure



## Compound Spectra (overlaid)

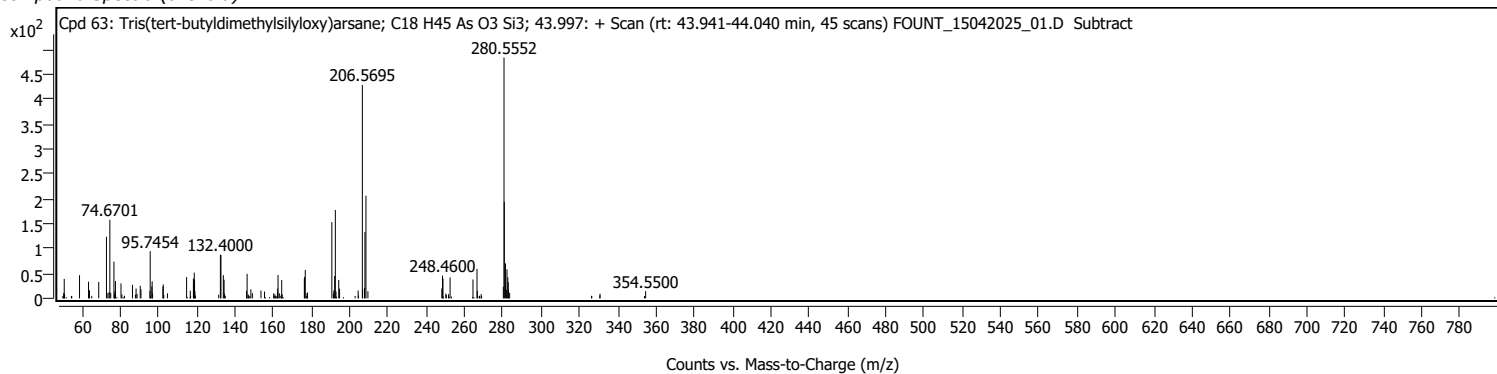

## Tris(tert-butyl dimethylsilyloxy)arsane

| m/z (prec.) | Species | CE | Score (Lib) | Score (Fwd) | Score (Rev) | Lib/DB   |
|-------------|---------|----|-------------|-------------|-------------|----------|
|             |         |    | 51.32       |             |             | NIST17.L |

## Library Match Details

| m/z (prec.) | Species | CE | Score (Lib) | Score (Fwd) | Score (Rev) | Lib/DB   |
|-------------|---------|----|-------------|-------------|-------------|----------|
|             |         |    | 51.32       |             |             | NIST17.L |

## Observed Spectrum

# Compound Discovery Report

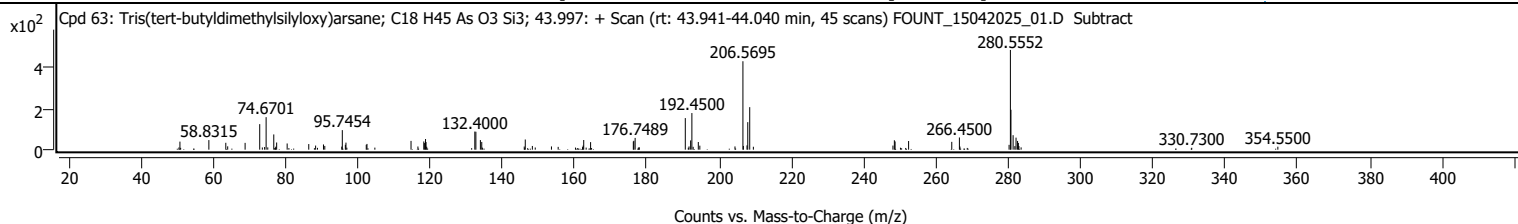

## Library Spectrum



## Cpd. 64: Tris(tert-butyltrimethylsilyloxy)arsane

| Name                                    | Formula       | RT     | CAS          | ID Source | Score | Algorithm | Lib/DB   |
|-----------------------------------------|---------------|--------|--------------|-----------|-------|-----------|----------|
| Tris(tert-butyltrimethylsilyloxy)arsane | C18H45AsO3Si3 | 44.071 | 1000366-57-5 | LibSearch | 54.63 | Integrate | NIST17.L |

## Compound ID Table

| Name                                             | Formula       | ID Source | RT     | CAS          | Score |
|--------------------------------------------------|---------------|-----------|--------|--------------|-------|
| Tris(tert-butyltrimethylsilyloxy)arsane          | C18H45AsO3Si3 | LibSearch | 44.071 | 1000366-57-5 | 54.63 |
| Arsenous acid, tris(trimethylsilyl) ester        | C9H27AsO3Si3  | LibSearch | 44.071 | 55429-29-3   | 54.53 |
| N,N-Dimethyl-4-nitroso-3-(trimethylsilyl)aniline | C11H18N2OSi   | LibSearch | 44.071 | 17993-84-9   | 50.80 |

## Structure



## Compound Spectra (overlaid)

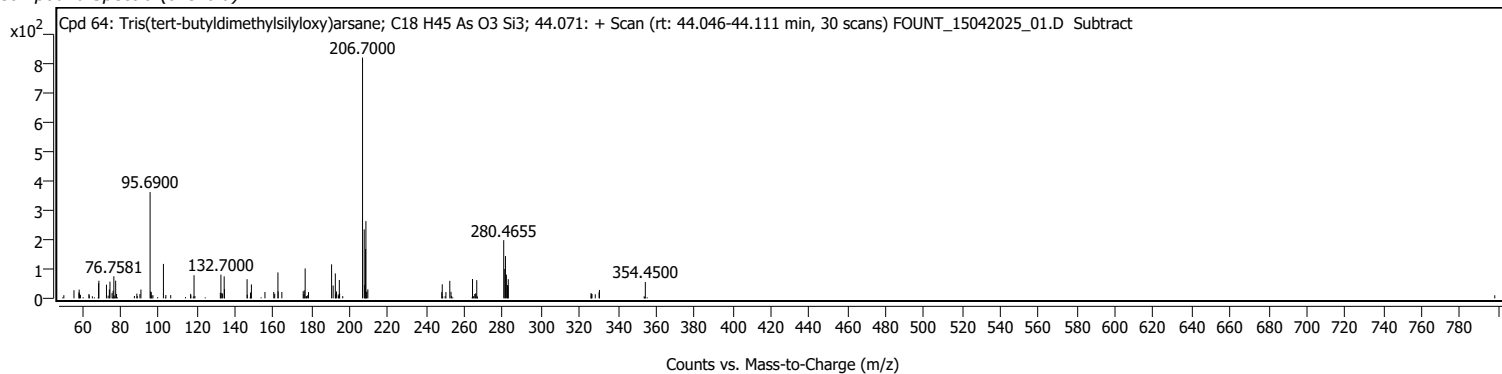

## Tris(tert-butyltrimethylsilyloxy)arsane

| m/z (prec.) | Species | CE | Score (Lib) | Score (Fwd) | Score (Rev) | Lib/DB   |
|-------------|---------|----|-------------|-------------|-------------|----------|
|             |         |    | 54.63       |             |             | NIST17.L |

## Library Match Details

| m/z (prec.) | Species | CE | Score (Lib) | Score (Fwd) | Score (Rev) | Lib/DB   |
|-------------|---------|----|-------------|-------------|-------------|----------|
|             |         |    | 54.63       |             |             | NIST17.L |

## Observed Spectrum

# Compound Discovery Report

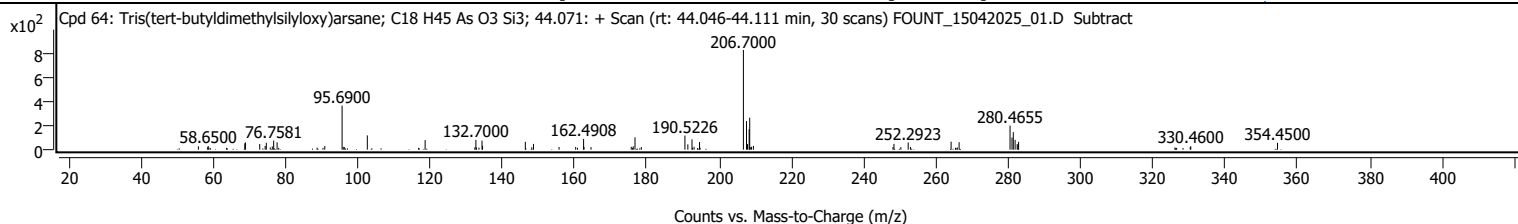

## Library Spectrum



## Cpd. 65: Tris(tert-butyl dimethylsilyloxy)arsane

| Name                                    | Formula       | RT     | CAS          | ID Source | Score | Algorithm | Lib/DB   |
|-----------------------------------------|---------------|--------|--------------|-----------|-------|-----------|----------|
| Tris(tert-butyl dimethylsilyloxy)arsane | C18H45AsO3Si3 | 44.266 | 1000366-57-5 | LibSearch | 56.02 | Integrate | NIST17.L |

## Compound ID Table

| Name                                             | Formula       | ID Source | RT     | CAS          | Score |
|--------------------------------------------------|---------------|-----------|--------|--------------|-------|
| Tris(tert-butyl dimethylsilyloxy)arsane          | C18H45AsO3Si3 | LibSearch | 44.266 | 1000366-57-5 | 56.02 |
| Arsenous acid, tris(trimethylsilyl) ester        | C9H27AsO3Si3  | LibSearch | 44.266 | 55429-29-3   | 54.20 |
| N,N-Dimethyl-4-nitroso-3-(trimethylsilyl)aniline | C11H18N2OSi   | LibSearch | 44.266 | 17993-84-9   | 52.31 |

## Structure



## Compound Spectra (overlaid)

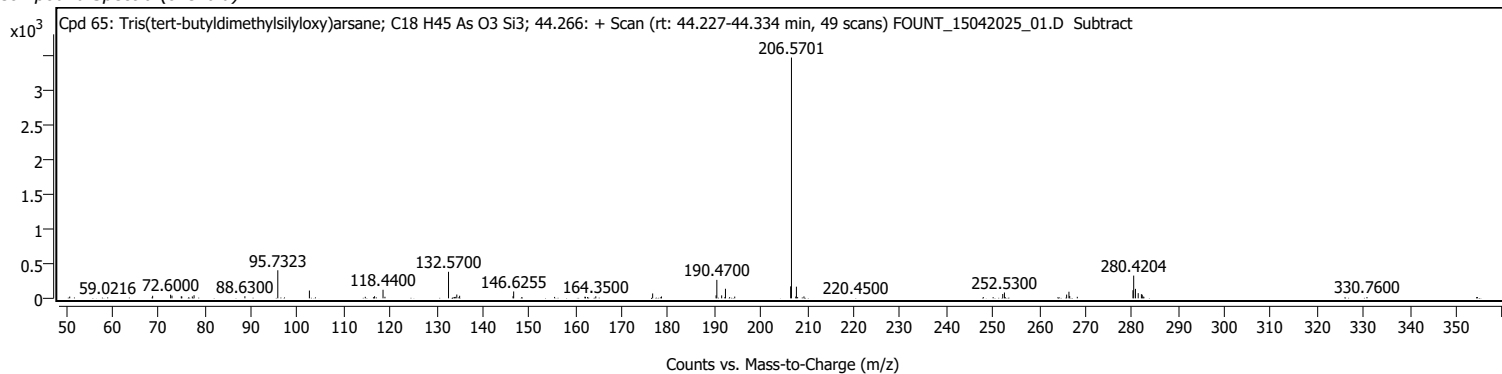

## Tris(tert-butyl dimethylsilyloxy)arsane

| m/z (prec.) | Species | CE | Score (Lib) | Score (Fwd) | Score (Rev) | Lib/DB   |
|-------------|---------|----|-------------|-------------|-------------|----------|
|             |         |    | 56.02       |             |             | NIST17.L |

## Library Match Details

| m/z (prec.) | Species | CE | Score (Lib) | Score (Fwd) | Score (Rev) | Lib/DB   |
|-------------|---------|----|-------------|-------------|-------------|----------|
|             |         |    | 56.02       |             |             | NIST17.L |

## Observed Spectrum

# Compound Discovery Report

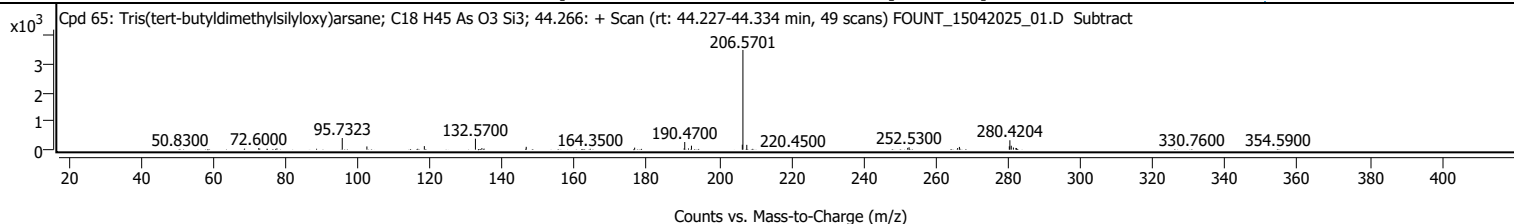

## Library Spectrum



## Cpd. 66: Tris(tert-butyl dimethylsilyloxy)arsane

| Name                                    | Formula       | RT     | CAS          | ID Source | Score | Algorithm | Lib/DB   |
|-----------------------------------------|---------------|--------|--------------|-----------|-------|-----------|----------|
| Tris(tert-butyl dimethylsilyloxy)arsane | C18H45AsO3Si3 | 44.424 | 1000366-57-5 | LibSearch | 50.99 | Integrate | NIST17.L |

## Compound ID Table

| Name                                                             | Formula       | ID Source | RT     | CAS          | Score |
|------------------------------------------------------------------|---------------|-----------|--------|--------------|-------|
| Tris(tert-butyl dimethylsilyloxy)arsane                          | C18H45AsO3Si3 | LibSearch | 44.424 | 1000366-57-5 | 50.99 |
| Arsenous acid, tris(trimethylsilyl) ester                        | C9H27AsO3Si3  | LibSearch | 44.424 | 55429-29-3   | 49.32 |
| 1-Isopropoxy-5-propyl-2,3-bis-trimethylsilyl-1,2-dihydroborinine | C17H35BOSi2   | LibSearch | 44.424 | 1000306-53-9 | 44.15 |

## Structure

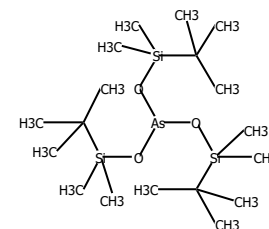

## Compound Spectra (overlaid)

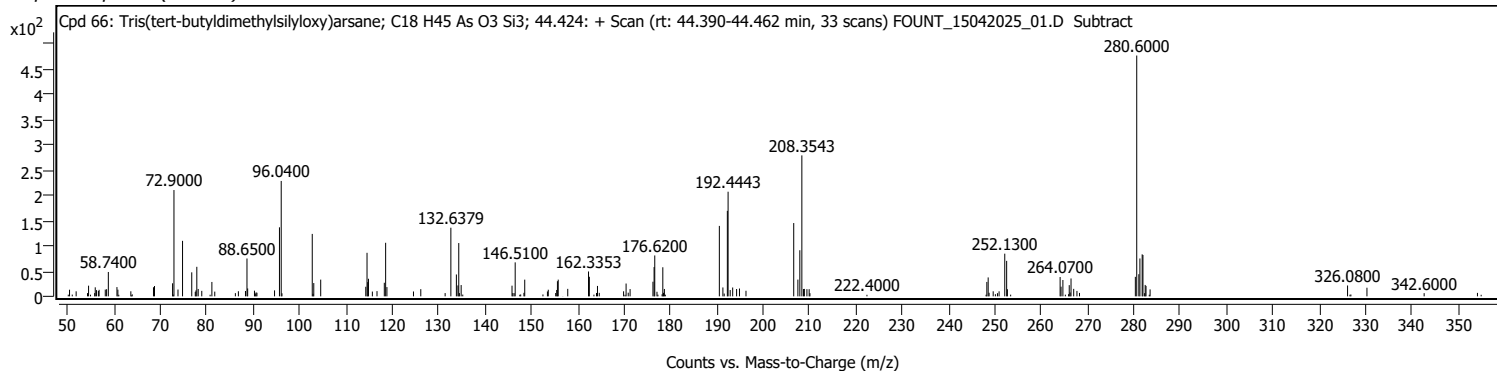

## Tris(tert-butyl dimethylsilyloxy)arsane

| m/z (prec.) | Species | CE | Score (Lib) | Score (Fwd) | Score (Rev) | Lib/DB   |
|-------------|---------|----|-------------|-------------|-------------|----------|
|             |         |    | 50.99       |             |             | NIST17.L |

## Library Match Details

| m/z (prec.) | Species | CE | Score (Lib) | Score (Fwd) | Score (Rev) | Lib/DB   |
|-------------|---------|----|-------------|-------------|-------------|----------|
|             |         |    | 50.99       |             |             | NIST17.L |

## Observed Spectrum

# Compound Discovery Report

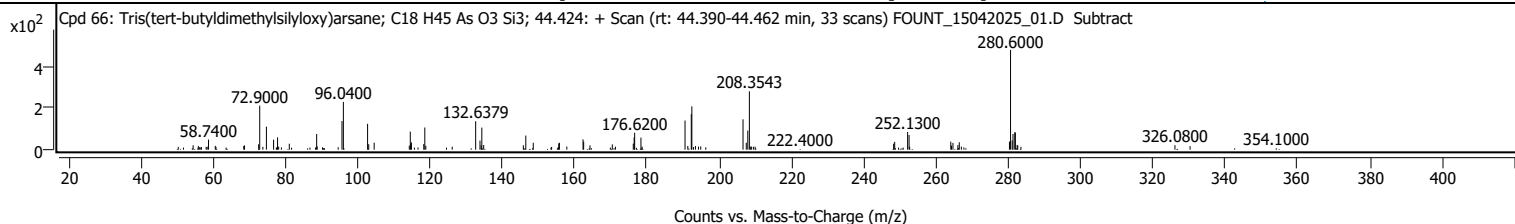

## Library Spectrum

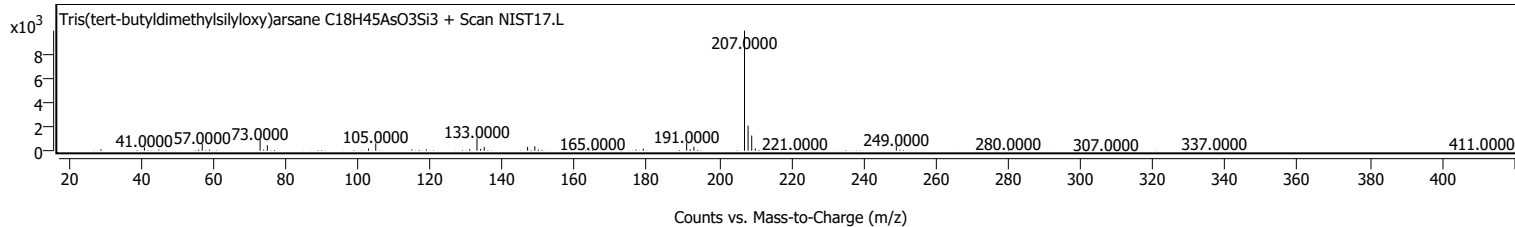

## Cpd. 67: (R)-9-[(S)-2-(Hydroxymethyl)pyrrolidin-1-yl]-3-methyl-3,4-dihydro-2H-benzo[b][1,4,5]oxathiazepine 1,1-dioxide

| Name                                                                                                          | Formula     | RT     | CAS          | ID Source | Score | Algorithm | Lib/DB   |
|---------------------------------------------------------------------------------------------------------------|-------------|--------|--------------|-----------|-------|-----------|----------|
| (R)-9-[(S)-2-(Hydroxymethyl)pyrrolidin-1-yl]-3-methyl-3,4-dihydro-2H-benzo[b][1,4,5]oxathiazepine 1,1-dioxide | C14H20N2O4S | 44.475 | 1334427-17-6 | LibSearch | 50.13 | Integrate | NIST17.L |

## Compound ID Table

| Name                                                                                                          | Formula     | ID Source | RT     | CAS          | Score |
|---------------------------------------------------------------------------------------------------------------|-------------|-----------|--------|--------------|-------|
| (R)-9-[(S)-2-(Hydroxymethyl)pyrrolidin-1-yl]-3-methyl-3,4-dihydro-2H-benzo[b][1,4,5]oxathiazepine 1,1-dioxide | C14H20N2O4S | LibSearch | 44.475 | 1334427-17-6 | 50.13 |
| (S)-9-[(S)-2-(Hydroxymethyl)pyrrolidin-1-yl]-3-methyl-3,4-dihydro-2H-benzo[b][1,4,5]oxathiazepine 1,1-dioxide | C14H20N2O4S | LibSearch | 44.475 | 1334427-13-2 | 50.12 |
| (S)-9-[(R)-2-(Hydroxymethyl)pyrrolidin-1-yl]-3-methyl-3,4-dihydro-2H-benzo[b][1,4,5]oxathiazepine 1,1-dioxide | C14H20N2O4S | LibSearch | 44.475 | 1334427-01-8 | 49.08 |

## Structure

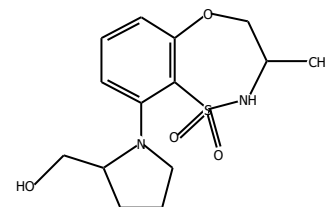

## Compound Spectra (overlaid)

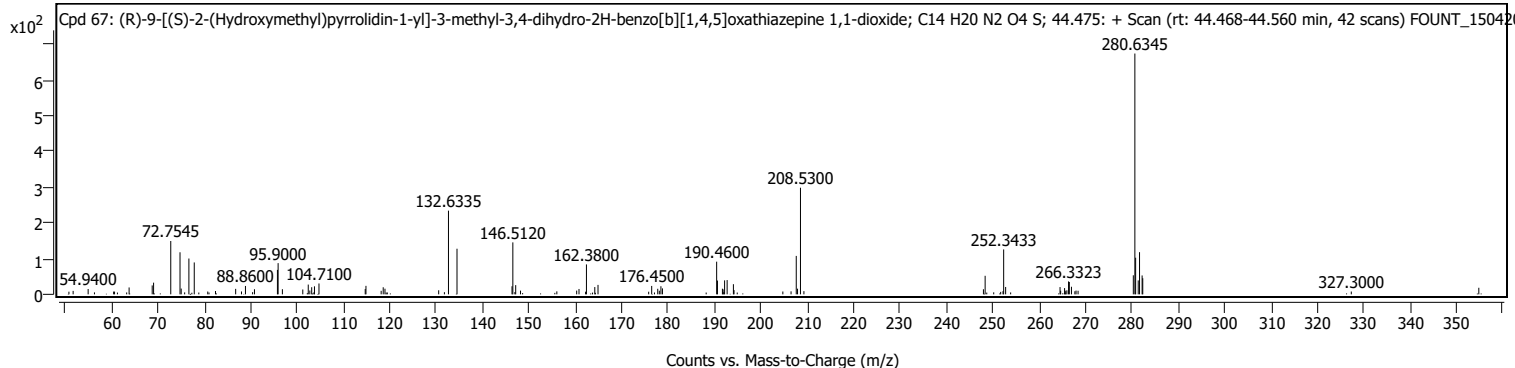

(R)-9-[(S)-2-(Hydroxymethyl)pyrrolidin-1-yl]-3-methyl-3,4-dihydro-2H-benzo[b][1,4,5]oxathiazepine 1,1-dioxide

| m/z (prec.) | Species | CE | Score (Lib) | Score (Fwd) | Score (Rev) | Lib/DB   |
|-------------|---------|----|-------------|-------------|-------------|----------|
| 50.13       |         |    | 50.13       |             |             | NIST17.L |

## Library Match Details

| m/z (prec.) | Species | CE | Score (Lib) | Score (Fwd) | Score (Rev) | Lib/DB   |
|-------------|---------|----|-------------|-------------|-------------|----------|
| 50.13       |         |    | 50.13       |             |             | NIST17.L |

## Observed Spectrum

MassHunter Qualitative Analysis

# Compound Discovery Report

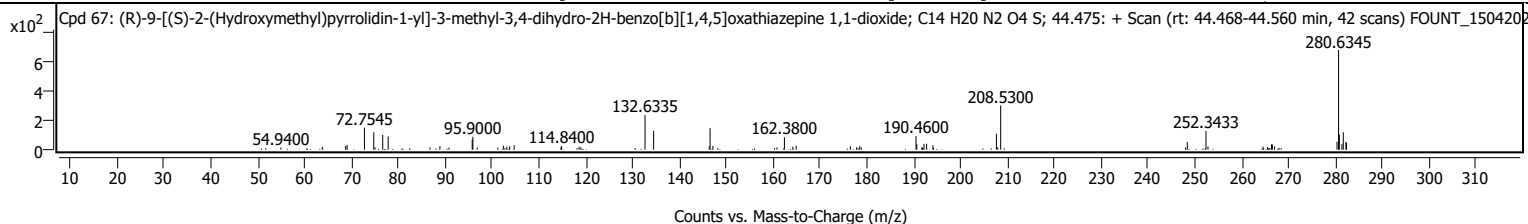

## Library Spectrum

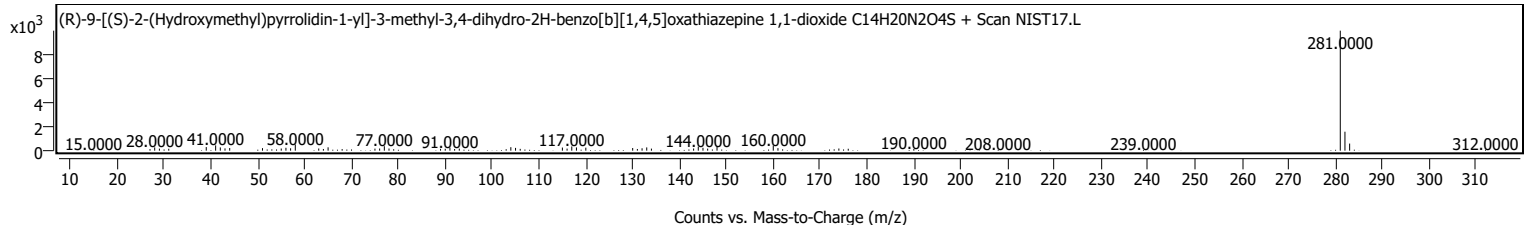

## Cpd. 68: Tris(tert-butylidimethylsilyloxy)arsane

| Name                                    | Formula                                                          | RT     | CAS          | ID Source | Score | Algorithm | Lib/DB   |
|-----------------------------------------|------------------------------------------------------------------|--------|--------------|-----------|-------|-----------|----------|
| Tris(tert-butylidimethylsilyloxy)arsane | C <sub>18</sub> H <sub>45</sub> AsO <sub>3</sub> Si <sub>3</sub> | 44.913 | 1000366-57-5 | LibSearch | 52.99 | Integrate | NIST17.L |

## Compound ID Table

| Name                                             | Formula                                                          | ID Source | RT     | CAS          | Score |
|--------------------------------------------------|------------------------------------------------------------------|-----------|--------|--------------|-------|
| Tris(tert-butylidimethylsilyloxy)arsane          | C <sub>18</sub> H <sub>45</sub> AsO <sub>3</sub> Si <sub>3</sub> | LibSearch | 44.913 | 1000366-57-5 | 52.99 |
| Arsenous acid, tris(trimethylsilyl) ester        | C <sub>9</sub> H <sub>27</sub> AsO <sub>3</sub> Si <sub>3</sub>  | LibSearch | 44.913 | 55429-29-3   | 51.92 |
| 2-p-Tolyl-2,3-dihydro-1H-benzo[1,3,2]diazaborole | C <sub>13</sub> H <sub>13</sub> BN <sub>2</sub>                  | LibSearch | 44.913 | 1000296-11-8 | 37.38 |

## Structure

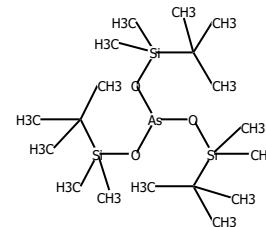

## Compound Spectra (overlaid)

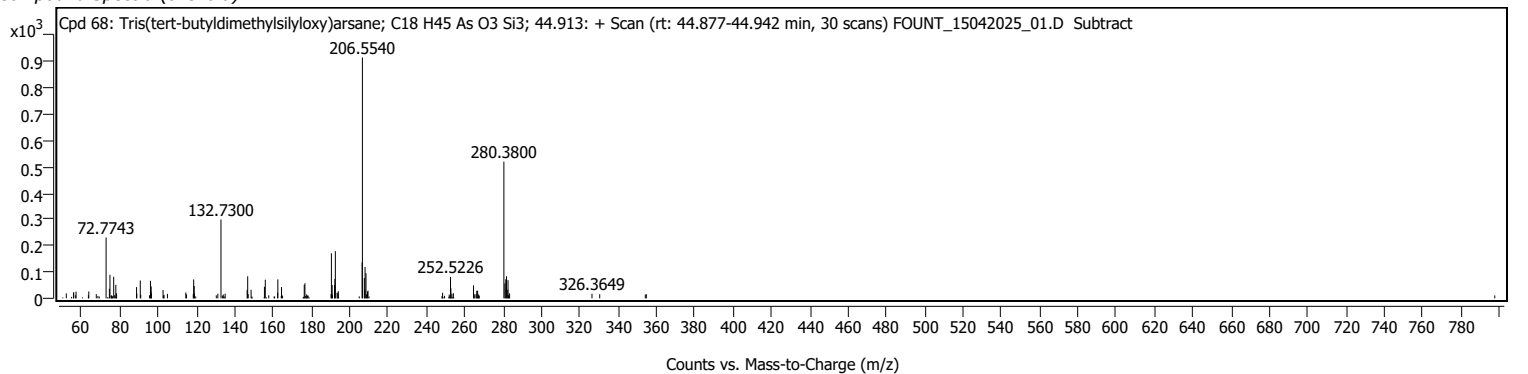

## Tris(tert-butylidimethylsilyloxy)arsane

| m/z (prec.) | Species | CE | Score (Lib) | Score (Fwd) | Score (Rev) | Lib/DB   |
|-------------|---------|----|-------------|-------------|-------------|----------|
|             |         |    | 52.99       |             |             | NIST17.L |

## Library Match Details

| m/z (prec.) | Species | CE | Score (Lib) | Score (Fwd) | Score (Rev) | Lib/DB   |
|-------------|---------|----|-------------|-------------|-------------|----------|
|             |         |    | 52.99       |             |             | NIST17.L |

## Observed Spectrum

# Compound Discovery Report

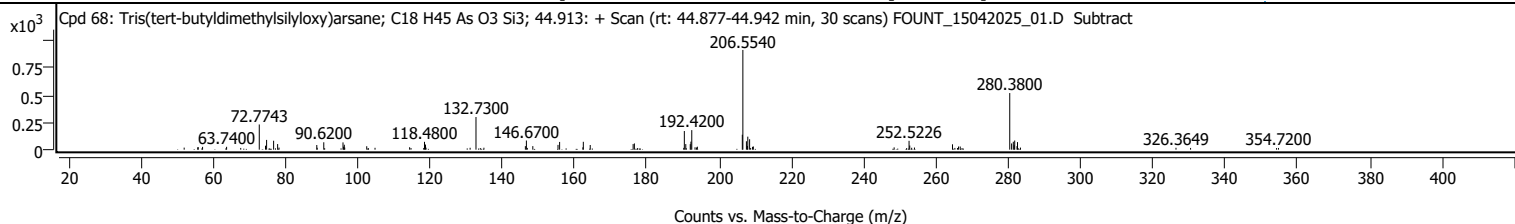

## Library Spectrum

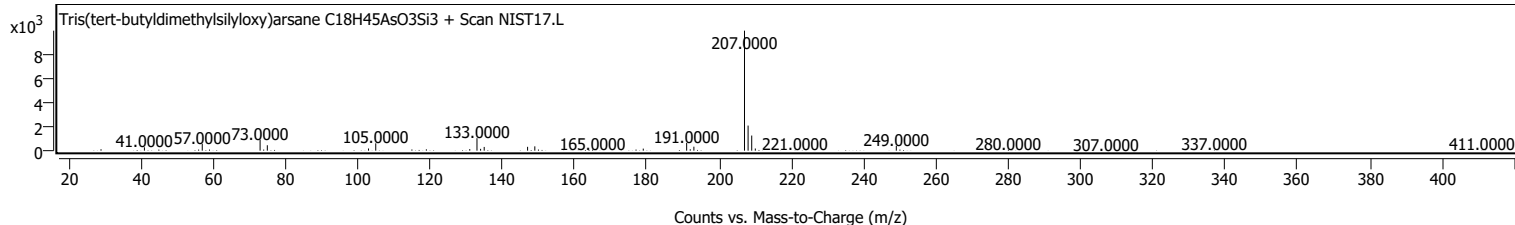

## Cpd. 69: Tris(tert-butyltrimethylsilyloxy)arsane

| Name                                    | Formula       | RT     | CAS          | ID Source | Score | Algorithm | Lib/DB   |
|-----------------------------------------|---------------|--------|--------------|-----------|-------|-----------|----------|
| Tris(tert-butyltrimethylsilyloxy)arsane | C18H45AsO3Si3 | 45.024 | 1000366-57-5 | LibSearch | 48.79 | Integrate | NIST17.L |

## Compound ID Table

| Name                                          | Formula       | ID Source | RT     | CAS          | Score |
|-----------------------------------------------|---------------|-----------|--------|--------------|-------|
| Tris(tert-butyltrimethylsilyloxy)arsane       | C18H45AsO3Si3 | LibSearch | 45.024 | 1000366-57-5 | 48.79 |
| Arsenous acid, tris(trimethylsilyl) ester     | C9H27AsO3Si3  | LibSearch | 45.024 | 55429-29-3   | 45.53 |
| 4-Pyridinol-3,5-dichloro-2,6-dimethyl-1-oxide | C7H7Cl2NO2    | LibSearch | 45.024 | 1000252-90-7 | 39.13 |

## Structure



## Compound Spectra (overlaid)

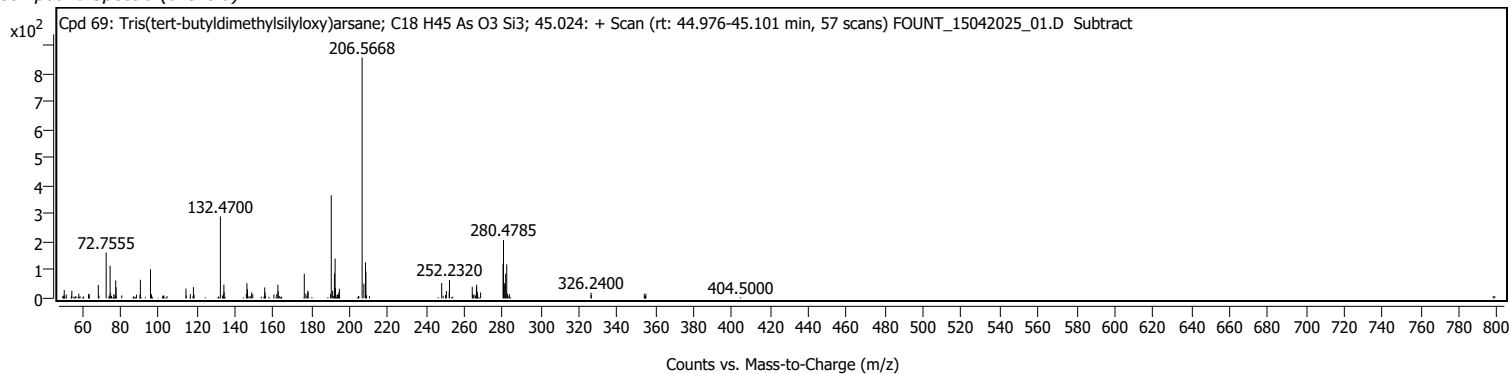

## Tris(tert-butyltrimethylsilyloxy)arsane

| m/z (prec.) | Species | CE | Score (Lib) | Score (Fwd) | Score (Rev) | Lib/DB   |
|-------------|---------|----|-------------|-------------|-------------|----------|
|             |         |    | 48.79       |             |             | NIST17.L |

## Library Match Details

| m/z (prec.) | Species | CE | Score (Lib) | Score (Fwd) | Score (Rev) | Lib/DB   |
|-------------|---------|----|-------------|-------------|-------------|----------|
|             |         |    | 48.79       |             |             | NIST17.L |

## Observed Spectrum

# Compound Discovery Report

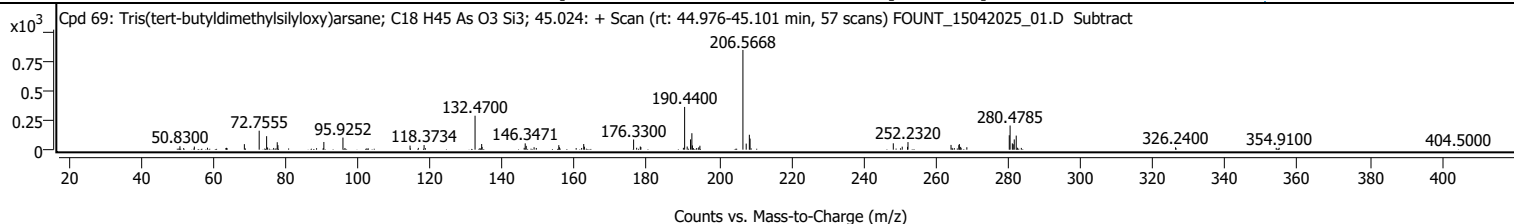

## Library Spectrum



## Cpd. 70: 1-Isopropoxy-5-propyl-2,3-bis-trimethylsilyl-1,2-dihydroborinine

| Name                                                             | Formula                                             | RT     | CAS          | ID Source | Score | Algorithm | Lib/DB   |
|------------------------------------------------------------------|-----------------------------------------------------|--------|--------------|-----------|-------|-----------|----------|
| 1-Isopropoxy-5-propyl-2,3-bis-trimethylsilyl-1,2-dihydroborinine | C <sub>17</sub> H <sub>35</sub> B O Si <sub>2</sub> | 45.281 | 1000306-53-9 | LibSearch | 32.48 | Integrate | NIST17.L |

## Compound ID Table

| Name                                                             | Formula                                                         | ID Source | RT     | CAS          | Score |
|------------------------------------------------------------------|-----------------------------------------------------------------|-----------|--------|--------------|-------|
| 1-Isopropoxy-5-propyl-2,3-bis-trimethylsilyl-1,2-dihydroborinine | C <sub>17</sub> H <sub>35</sub> BOSi <sub>2</sub>               | LibSearch | 45.281 | 1000306-53-9 | 32.48 |
| Phenyl 4-[(trimethylsilyl)amino]-2-[(trimethylsilyloxy)benzoate  | C <sub>19</sub> H <sub>27</sub> NO <sub>3</sub> Si <sub>2</sub> | LibSearch | 45.281 | 1000408-08-9 | 30.82 |

## Structure

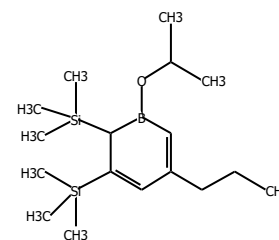

## Compound Spectra (overlaid)

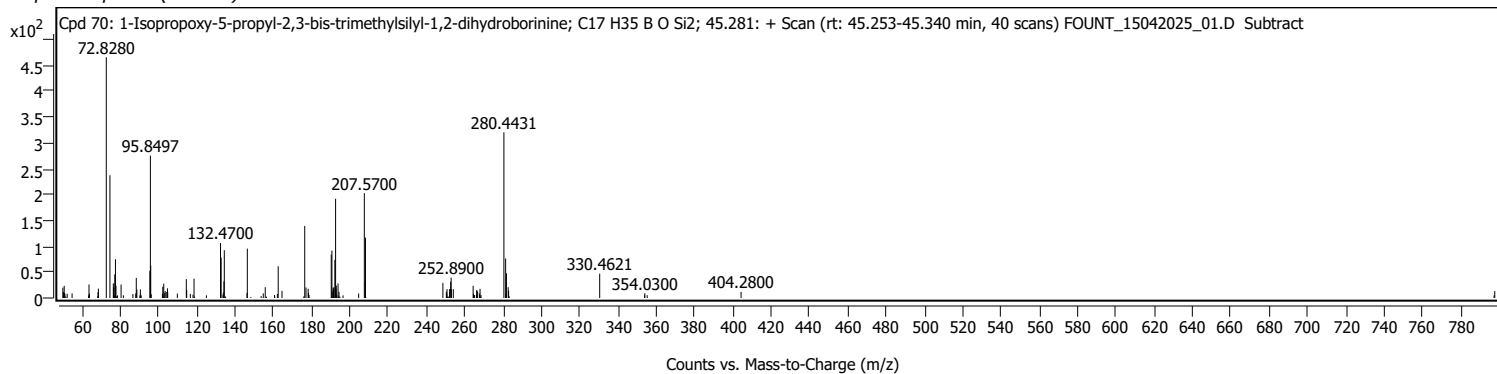

## 1-Isopropoxy-5-propyl-2,3-bis-trimethylsilyl-1,2-dihydroborinine

| m/z (prec.) | Species                                                          | CE    | Score (Lib) | Score (Fwd) | Score (Rev) | Lib/DB   |
|-------------|------------------------------------------------------------------|-------|-------------|-------------|-------------|----------|
| 72.8280     | 1-Isopropoxy-5-propyl-2,3-bis-trimethylsilyl-1,2-dihydroborinine | 32.48 | 32.48       |             |             | NIST17.L |

## Library Match Details

| m/z (prec.) | Species                                                          | CE    | Score (Lib) | Score (Fwd) | Score (Rev) | Lib/DB   |
|-------------|------------------------------------------------------------------|-------|-------------|-------------|-------------|----------|
| 72.8280     | 1-Isopropoxy-5-propyl-2,3-bis-trimethylsilyl-1,2-dihydroborinine | 32.48 | 32.48       |             |             | NIST17.L |

## Observed Spectrum

# Compound Discovery Report

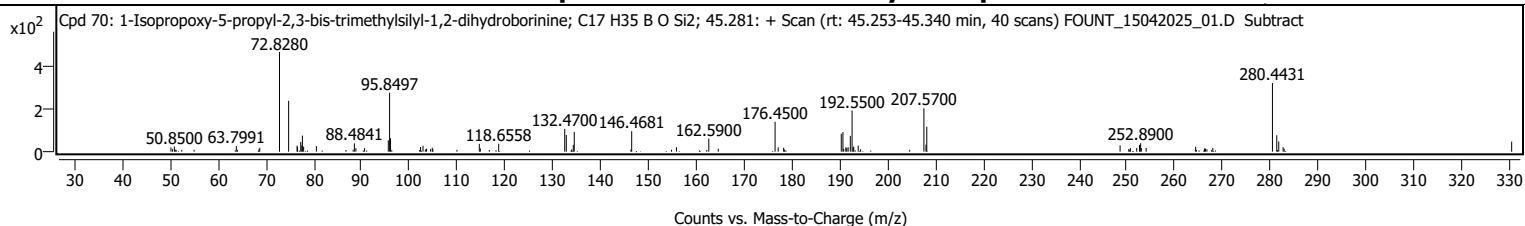

## Library Spectrum



## Cpd. 71: Tris(tert-butylidimethylsilyloxy)arsane

| Name                                    | Formula           | RT     | CAS          | ID Source | Score | Algorithm | Lib/DB   |
|-----------------------------------------|-------------------|--------|--------------|-----------|-------|-----------|----------|
| Tris(tert-butylidimethylsilyloxy)arsane | C18 H45 As O3 Si3 | 46.002 | 1000366-57-5 | LibSearch | 61.27 | Integrate | NIST17.L |

## Compound ID Table

| Name                                             | Formula       | ID Source | RT     | CAS          | Score |
|--------------------------------------------------|---------------|-----------|--------|--------------|-------|
| Tris(tert-butylidimethylsilyloxy)arsane          | C18H45AsO3Si3 | LibSearch | 46.002 | 1000366-57-5 | 61.27 |
| Arsenous acid, tris(trimethylsilyl) ester        | C9H27AsO3Si3  | LibSearch | 46.002 | 55429-29-3   | 55.67 |
| N,N-Dimethyl-4-nitroso-3-(trimethylsilyl)aniline | C11H18N2OSi   | LibSearch | 46.002 | 17993-84-9   | 51.50 |

## Structure



## Compound Spectra (overlaid)

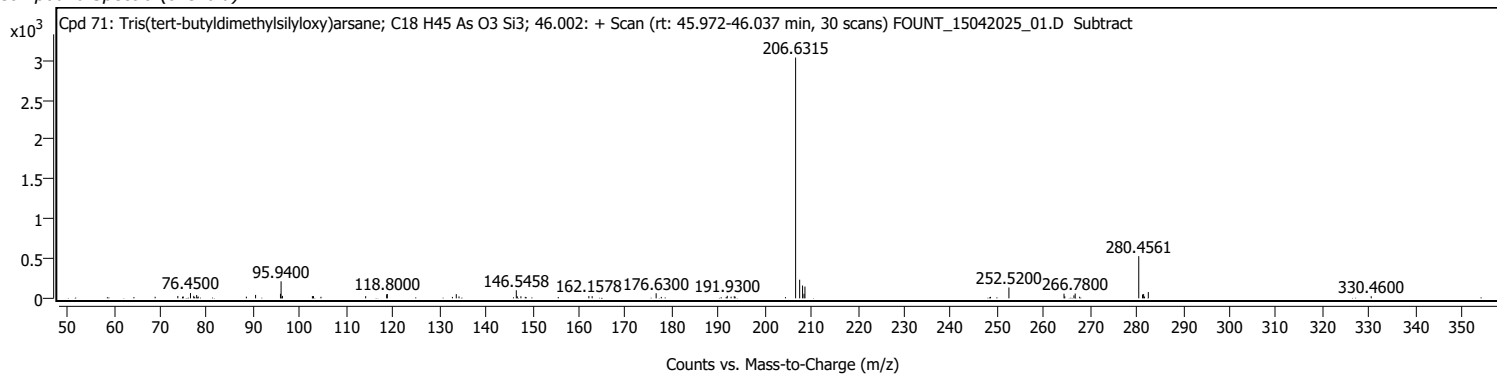

## Tris(tert-butylidimethylsilyloxy)arsane

| m/z (prec.) | Species | CE | Score (Lib) | Score (Fwd) | Score (Rev) | Lib/DB   |
|-------------|---------|----|-------------|-------------|-------------|----------|
|             |         |    | 61.27       |             |             | NIST17.L |

## Library Match Details

| m/z (prec.) | Species | CE | Score (Lib) | Score (Fwd) | Score (Rev) | Lib/DB   |
|-------------|---------|----|-------------|-------------|-------------|----------|
|             |         |    | 61.27       |             |             | NIST17.L |

## Observed Spectrum

# Compound Discovery Report

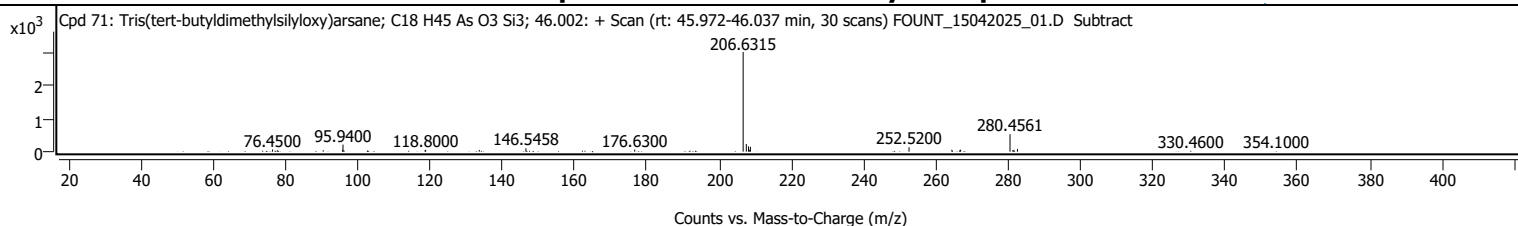

## Library Spectrum

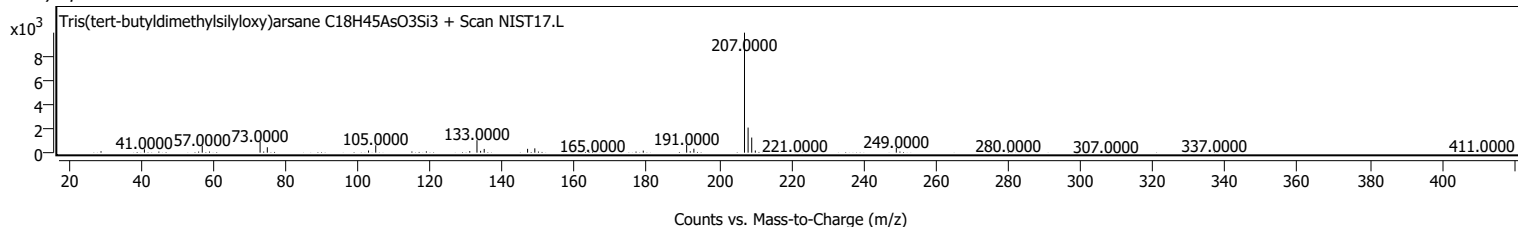

## Cpd. 72: Tris(tert-butyl dimethylsilyloxy)arsane

| Name                                    | Formula           | RT     | CAS          | ID Source | Score | Algorithm | Lib/DB   |
|-----------------------------------------|-------------------|--------|--------------|-----------|-------|-----------|----------|
| Tris(tert-butyl dimethylsilyloxy)arsane | C18 H45 As O3 Si3 | 46.506 | 1000366-57-5 | LibSearch | 50.65 | Integrate | NIST17.L |

## Compound ID Table

| Name                                                        | Formula       | ID Source | RT     | CAS          | Score |
|-------------------------------------------------------------|---------------|-----------|--------|--------------|-------|
| Tris(tert-butyl dimethylsilyloxy)arsane                     | C18H45AsO3Si3 | LibSearch | 46.506 | 1000366-57-5 | 50.65 |
| N,N-Dimethyl-4-nitroso-3-(trimethylsilyl)aniline            | C11H18N2OSi   | LibSearch | 46.506 | 17993-84-9   | 46.65 |
| Caprolactone oxime, (NB)-O-[(diethylboryloxy)(ethyl)boryl]- | C12H25B2NO2   | LibSearch | 46.506 | 1000161-37-6 | 43.91 |

## Structure



## Compound Spectra (overlaid)

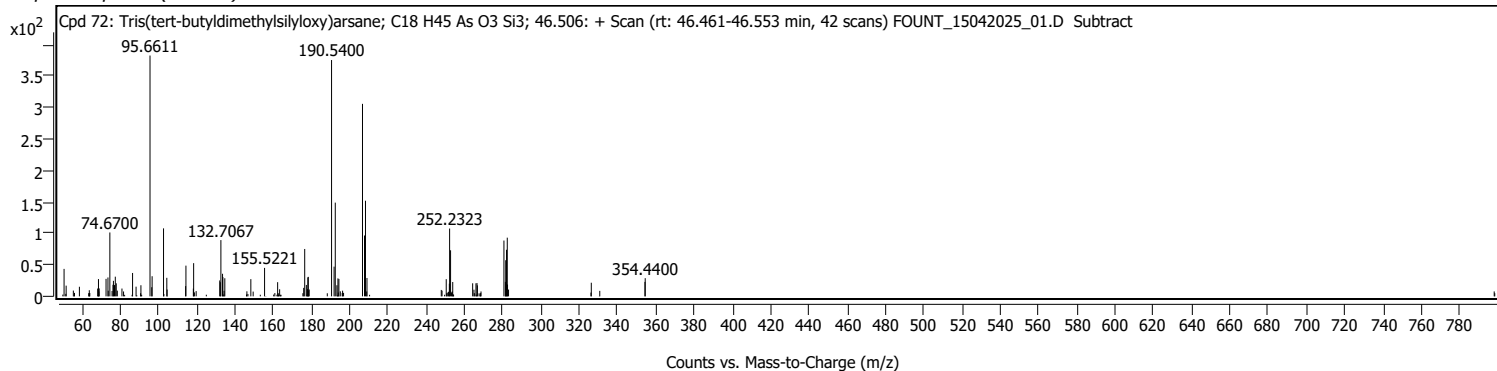

## Tris(tert-butyl dimethylsilyloxy)arsane

| m/z (prec.) | Species | CE | Score (Lib) | Score (Fwd) | Score (Rev) | Lib/DB   |
|-------------|---------|----|-------------|-------------|-------------|----------|
|             |         |    | 50.65       |             |             | NIST17.L |

## Library Match Details

| m/z (prec.) | Species | CE | Score (Lib) | Score (Fwd) | Score (Rev) | Lib/DB   |
|-------------|---------|----|-------------|-------------|-------------|----------|
|             |         |    | 50.65       |             |             | NIST17.L |

## Observed Spectrum

# Compound Discovery Report

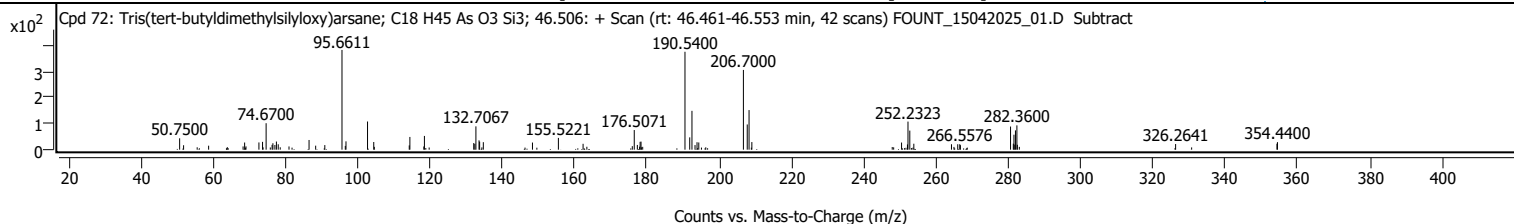

## Library Spectrum



## Cpd 73: 46.687

| Name | Formula | RT     | CAS | ID Source | Score | Algorithm | Lib/DB |
|------|---------|--------|-----|-----------|-------|-----------|--------|
|      |         | 46.687 |     |           |       | Integrate |        |

## Structure

## Compound Spectra (overlaid)

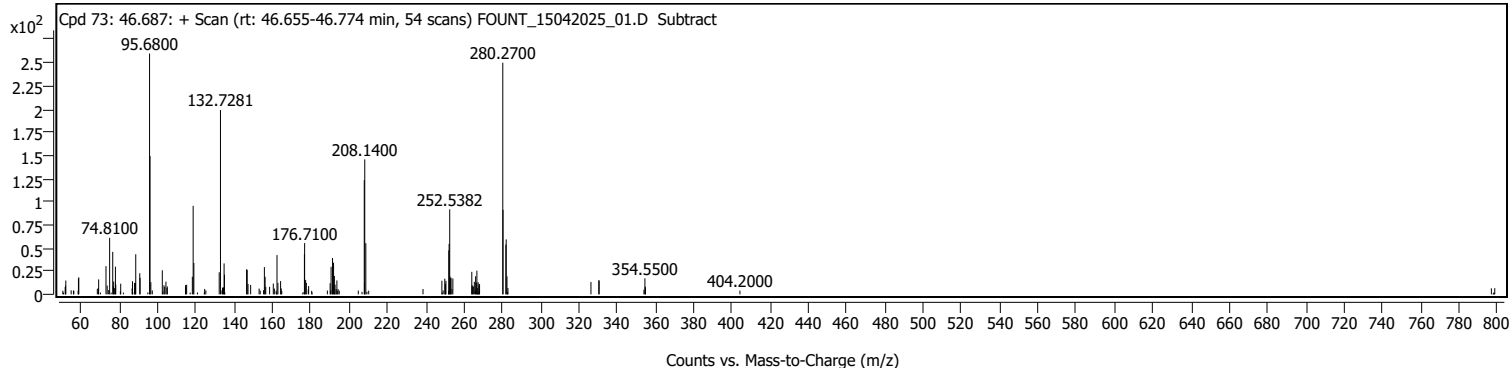

## Cpd. 74: Tris(tert-butyltrimethylsilyloxy)arsane

| Name                                    | Formula                                                          | RT     | CAS          | ID Source | Score | Algorithm | Lib/DB   |
|-----------------------------------------|------------------------------------------------------------------|--------|--------------|-----------|-------|-----------|----------|
| Tris(tert-butyltrimethylsilyloxy)arsane | C <sub>18</sub> H <sub>45</sub> AsO <sub>3</sub> Si <sub>3</sub> | 47.246 | 1000366-57-5 | LibSearch | 51.00 | Integrate | NIST17.L |

## Compound ID Table

| Name                                                        | Formula                                                          | ID Source | RT     | CAS          | Score |
|-------------------------------------------------------------|------------------------------------------------------------------|-----------|--------|--------------|-------|
| Tris(tert-butyltrimethylsilyloxy)arsane                     | C <sub>18</sub> H <sub>45</sub> AsO <sub>3</sub> Si <sub>3</sub> | LibSearch | 47.246 | 1000366-57-5 | 51.00 |
| Arsenous acid, tris(trimethylsilyl) ester                   | C <sub>9</sub> H <sub>27</sub> AsO <sub>3</sub> Si <sub>3</sub>  | LibSearch | 47.246 | 55429-29-3   | 50.27 |
| Caprolactone oxime, (NB)-O-[(diethylboryloxy)(ethyl)boryl]- | C <sub>12</sub> H <sub>25</sub> B <sub>2</sub> NO <sub>2</sub>   | LibSearch | 47.246 | 1000161-37-6 | 45.19 |

## Structure

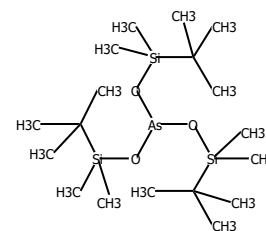

## Compound Spectra (overlaid)

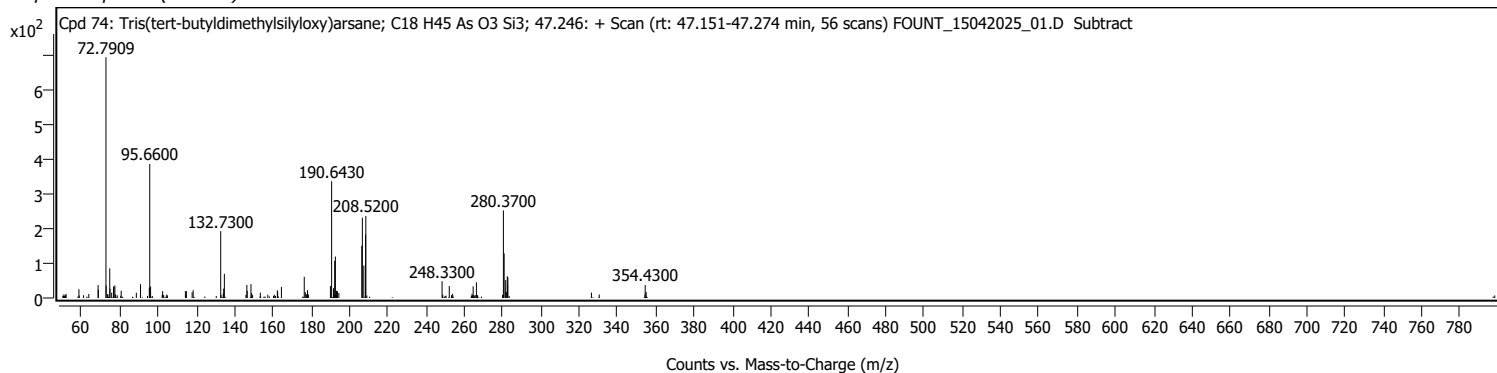

## Tris(tert-butyl(dimethylsilyloxy)arsane

| m/z (prec.) | Species | CE | Score (Lib) | Score (Fwd) | Score (Rev) | Lib/DB   |
|-------------|---------|----|-------------|-------------|-------------|----------|
|             |         |    | 51.00       |             |             | NIST17.L |

## Library Match Details

| m/z (prec.) | Species | CE | Score (Lib) | Score (Fwd) | Score (Rev) | Lib/DB   |
|-------------|---------|----|-------------|-------------|-------------|----------|
|             |         |    | 51.00       |             |             | NIST17.L |

## Observed Spectrum

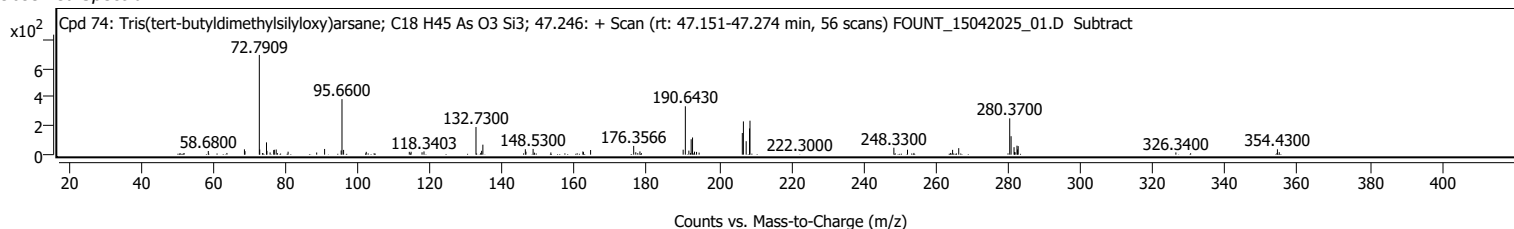

## Library Spectrum

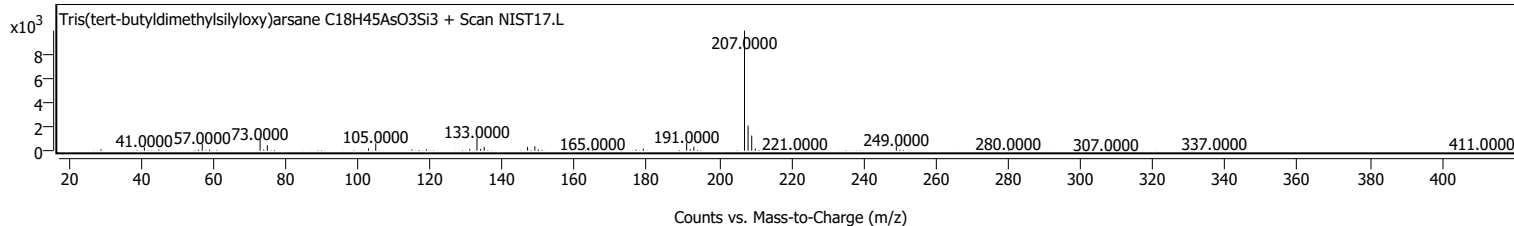

## Cpd. 75: O,O-Dimethyl [1-(4-methyl-1,2,5-oxadiazol-3-ylamino)-1-(2-fluorophenyl)methyl]phosphonate

| Name                                                                                      | Formula           | RT     | CAS         | ID Source | Score | Algorithm | Lib/DB   |
|-------------------------------------------------------------------------------------------|-------------------|--------|-------------|-----------|-------|-----------|----------|
| O,O-Dimethyl [1-(4-methyl-1,2,5-oxadiazol-3-ylamino)-1-(2-fluorophenyl)methyl]phosphonate | C12 H15 F N3 O4 P | 47.343 | 149053-98-5 | LibSearch | 42.87 | Integrate | NIST17.L |

## Compound ID Table

| Name                                                                                      | Formula      | ID Source | RT     | CAS          | Score |
|-------------------------------------------------------------------------------------------|--------------|-----------|--------|--------------|-------|
| O,O-Dimethyl [1-(4-methyl-1,2,5-oxadiazol-3-ylamino)-1-(2-fluorophenyl)methyl]phosphonate | C12H15FN3O4P | LibSearch | 47.343 | 149053-98-5  | 42.87 |
| borane, phenylbis(2,4,6-trimethylphenyl)-                                                 | C24H27B      | LibSearch | 47.343 | 1000402-36-3 | 39.86 |
| Cobalt, bis(ethene)-eta.-5-(ethyltetramethylcyclopentadienyl)-                            | C15H25Co     | LibSearch | 47.343 | 1000163-93-4 | 39.60 |

## Structure

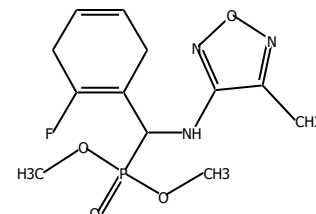

## Compound Spectra (overlaid)

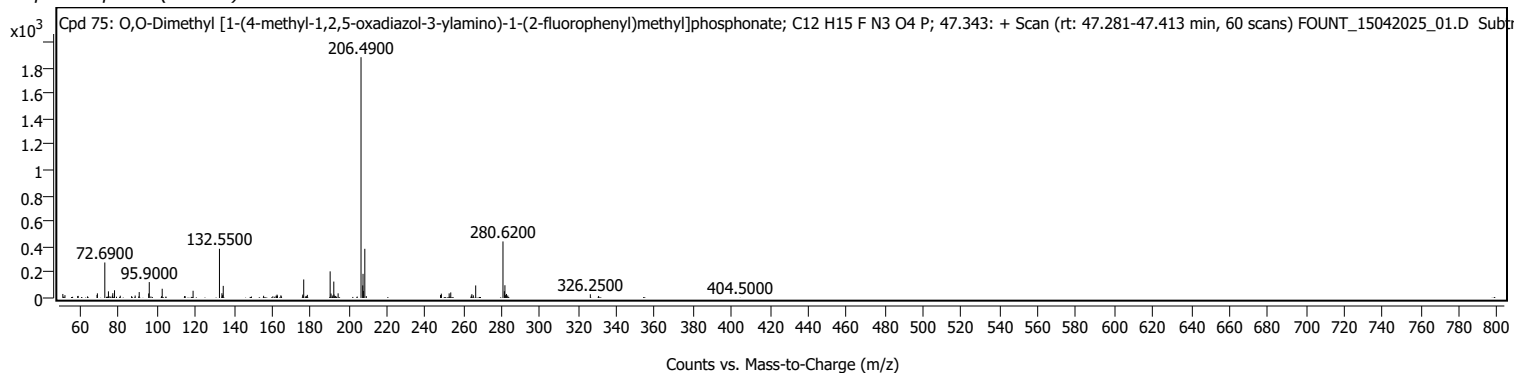

O,O-Dimethyl [1-(4-methyl-1,2,5-oxadiazol-3-ylamino)-1-(2-fluorophenyl)methyl]phosphonate

| m/z (prec.) | Species | CE | Score (Lib) | Score (Fwd) | Score (Rev) | Lib/DB   |
|-------------|---------|----|-------------|-------------|-------------|----------|
|             |         |    | 42.87       |             |             | NIST17.L |

## Library Match Details

| m/z (prec.) | Species | CE | Score (Lib) | Score (Fwd) | Score (Rev) | Lib/DB   |
|-------------|---------|----|-------------|-------------|-------------|----------|
|             |         |    | 42.87       |             |             | NIST17.L |

## Observed Spectrum

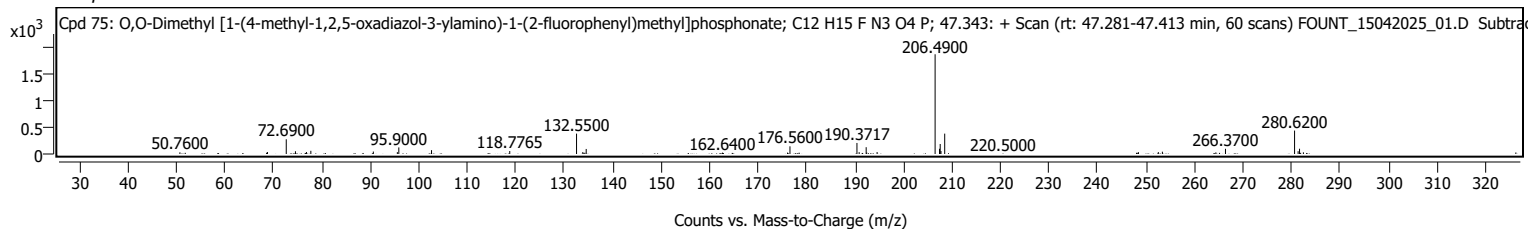

## Library Spectrum

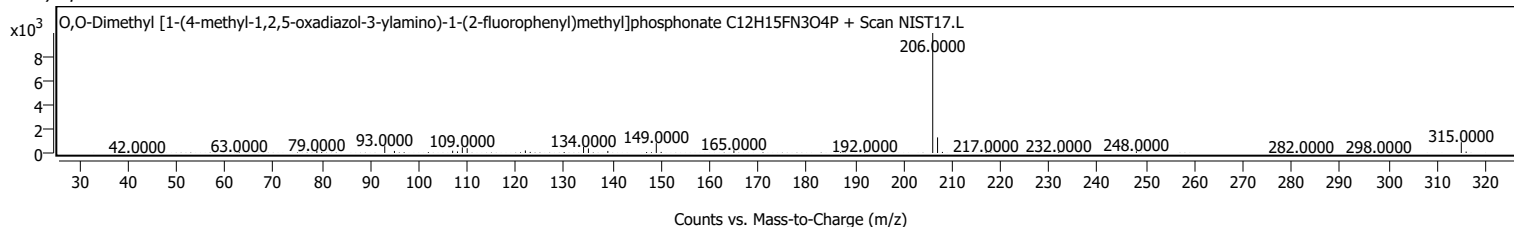

## Cpd. 76: Tris(tert-butyl)dimethylsilyloxy)arsane

| Name                                    | Formula                                                          | RT     | CAS          | ID Source | Score | Algorithm | Lib/DB   |
|-----------------------------------------|------------------------------------------------------------------|--------|--------------|-----------|-------|-----------|----------|
| Tris(tert-butyl)dimethylsilyloxy)arsane | C <sub>18</sub> H <sub>45</sub> AsO <sub>3</sub> Si <sub>3</sub> | 47.751 | 1000366-57-5 | LibSearch | 62.47 | Integrate | NIST17.L |

## Compound ID Table

| Name                                             | Formula                                                          | ID Source | RT     | CAS          | Score |
|--------------------------------------------------|------------------------------------------------------------------|-----------|--------|--------------|-------|
| Tris(tert-butyl)dimethylsilyloxy)arsane          | C <sub>18</sub> H <sub>45</sub> AsO <sub>3</sub> Si <sub>3</sub> | LibSearch | 47.751 | 1000366-57-5 | 62.47 |
| Arsenous acid, tris(trimethylsilyl) ester        | C <sub>9</sub> H <sub>27</sub> AsO <sub>3</sub> Si <sub>3</sub>  | LibSearch | 47.751 | 55429-29-3   | 59.73 |
| N,N-Dimethyl-4-nitroso-3-(trimethylsilyl)aniline | C <sub>11</sub> H <sub>18</sub> N <sub>2</sub> O <sub>2</sub> Si | LibSearch | 47.751 | 17993-84-9   | 46.79 |

## Structure

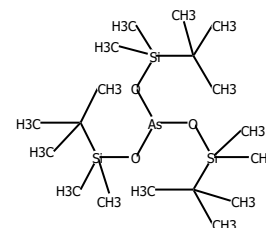

## Compound Spectra (overlaid)

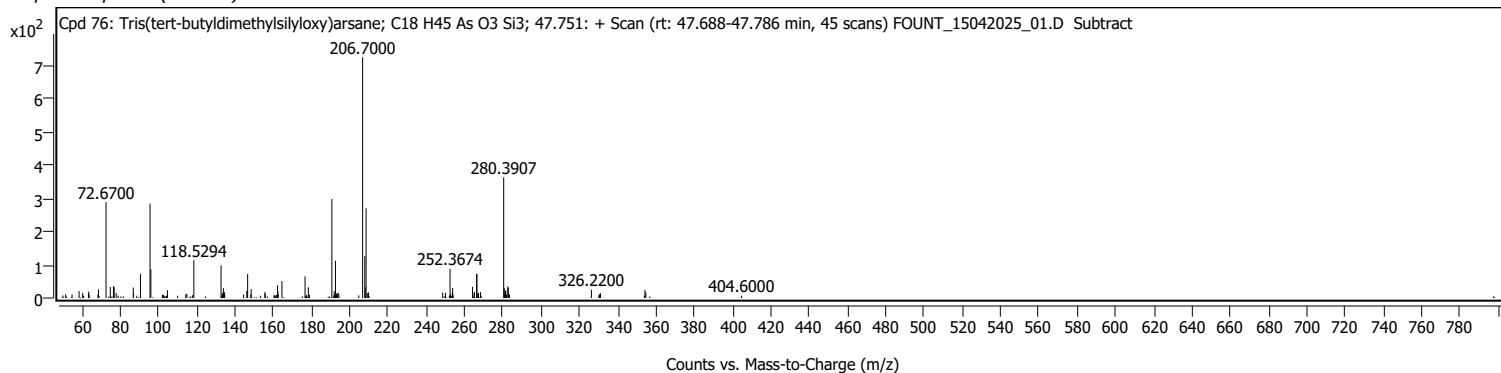

Tris(tert-butyl(dimethylsilyloxy)arsane

| m/z (prec.) | Species | CE | Score (Lib) | Score (Fwd) | Score (Rev) | Lib/DB   |
|-------------|---------|----|-------------|-------------|-------------|----------|
|             |         |    | 62.47       |             |             | NIST17.L |

## Library Match Details

| m/z (prec.) | Species | CE | Score (Lib) | Score (Fwd) | Score (Rev) | Lib/DB   |
|-------------|---------|----|-------------|-------------|-------------|----------|
|             |         |    | 62.47       |             |             | NIST17.L |

## Observed Spectrum

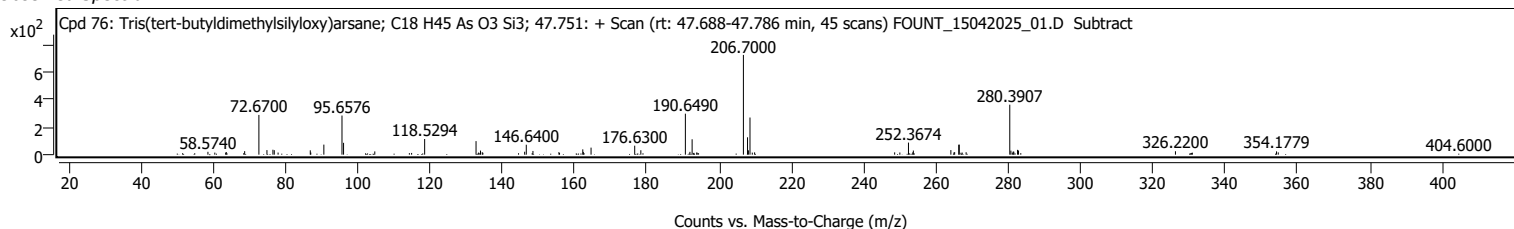

## Library Spectrum

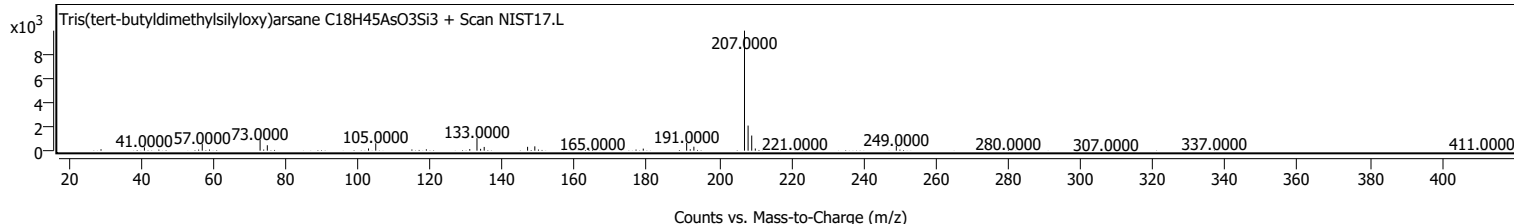

## Cpd. 77: Tris(tert-butyl(dimethylsilyloxy)arsane

| Name                                    | Formula           | RT     | CAS          | ID Source | Score | Algorithm | Lib/DB   |
|-----------------------------------------|-------------------|--------|--------------|-----------|-------|-----------|----------|
| Tris(tert-butyl(dimethylsilyloxy)arsane | C18 H45 As O3 Si3 | 47.924 | 1000366-57-5 | LibSearch | 49.98 | Integrate | NIST17.L |

## Compound ID Table

| Name                                             | Formula       | ID Source | RT     | CAS          | Score |
|--------------------------------------------------|---------------|-----------|--------|--------------|-------|
| Tris(tert-butyl(dimethylsilyloxy)arsane          | C18H45AsO3Si3 | LibSearch | 47.924 | 1000366-57-5 | 49.98 |
| Arsenous acid, tris(trimethylsilyl) ester        | C9H27AsO3Si3  | LibSearch | 47.924 | 55429-29-3   | 48.01 |
| N,N-Dimethyl-4-nitroso-3-(trimethylsilyl)aniline | C11H18N2OSi   | LibSearch | 47.924 | 17993-84-9   | 45.01 |

## Structure

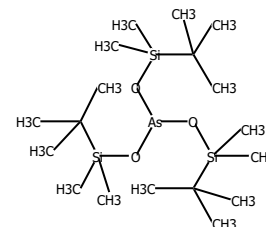

# Compound Discovery Report

## Compound Spectra (overlaid)

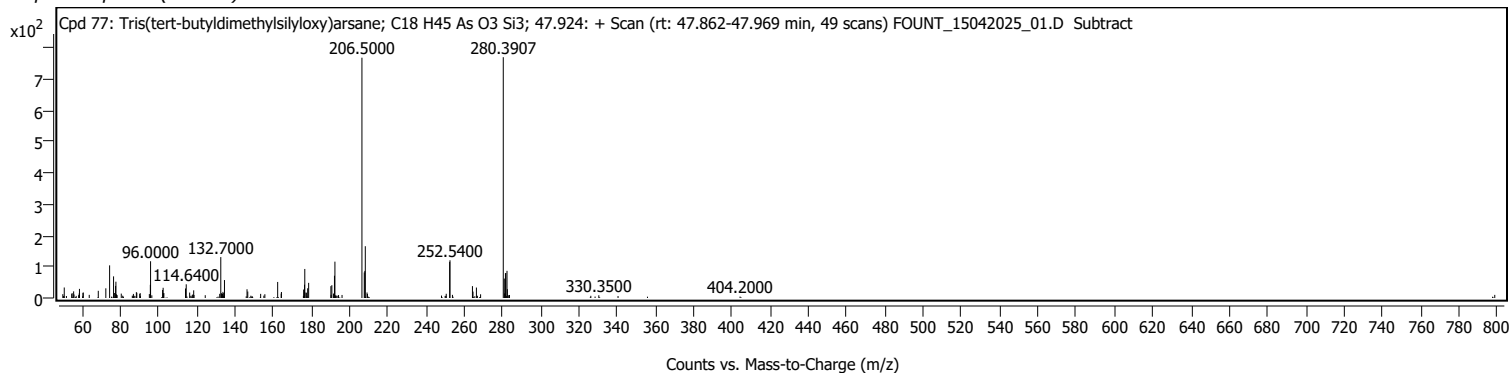

Tris(tert-butyl(dimethylsilyloxy)arsane

| m/z (prec.) | Species | CE | Score (Lib) | Score (Fwd) | Score (Rev) | Lib/DB   |
|-------------|---------|----|-------------|-------------|-------------|----------|
|             |         |    | 49.98       |             |             | NIST17.L |

## Library Match Details

| m/z (prec.) | Species | CE | Score (Lib) | Score (Fwd) | Score (Rev) | Lib/DB   |
|-------------|---------|----|-------------|-------------|-------------|----------|
|             |         |    | 49.98       |             |             | NIST17.L |

## Observed Spectrum

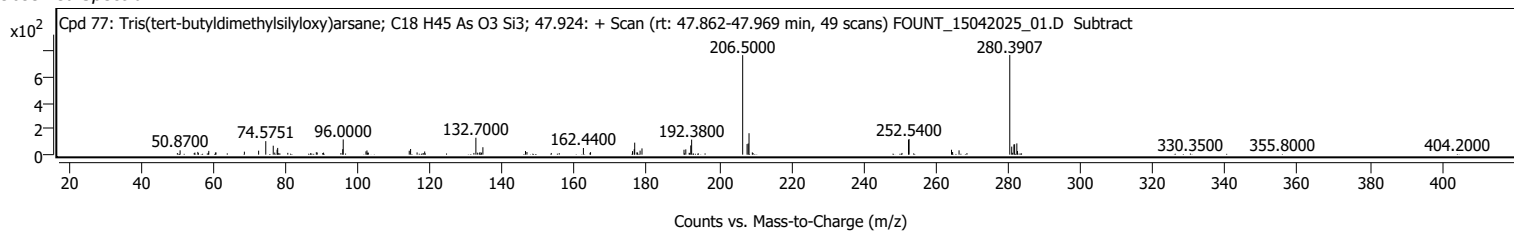

## Library Spectrum



## Cpd. 78: N,N-Dimethyl-4-nitroso-3-(trimethylsilyl)aniline

| Name                                             | Formula         | RT     | CAS        | ID Source | Score | Algorithm | Lib/DB   |
|--------------------------------------------------|-----------------|--------|------------|-----------|-------|-----------|----------|
| N,N-Dimethyl-4-nitroso-3-(trimethylsilyl)aniline | C11 H18 N2 O Si | 48.234 | 17993-84-9 | LibSearch | 42.18 | Integrate | NIST17.L |

## Compound ID Table

| Name                                             | Formula     | ID Source | RT     | CAS          | Score |
|--------------------------------------------------|-------------|-----------|--------|--------------|-------|
| N,N-Dimethyl-4-nitroso-3-(trimethylsilyl)aniline | C11H18N2OSi | LibSearch | 48.234 | 17993-84-9   | 42.18 |
| Methanamine, N-(diphenylethenylidene)-           | C15H13N     | LibSearch | 48.234 | 13911-54-1   | 38.65 |
| 4-Pyridinol-3,5-dichloro-2,6-dimethyl-1-oxide    | C7H7Cl2NO2  | LibSearch | 48.234 | 1000252-90-7 | 34.08 |

## Structure

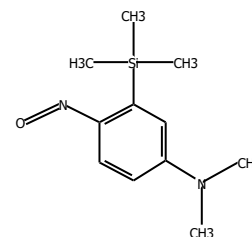

## Compound Spectra (overlaid)

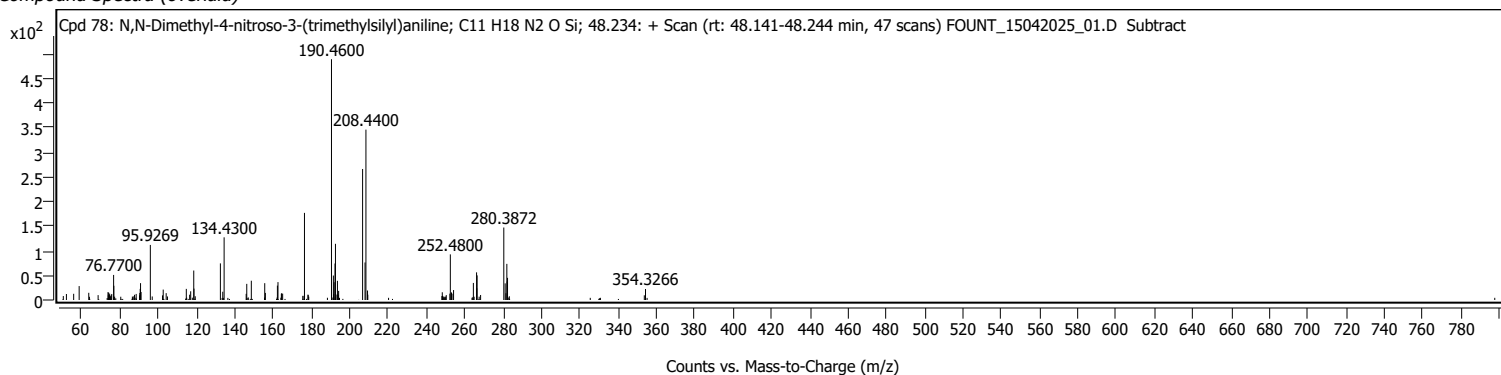

## N,N-Dimethyl-4-nitroso-3-(trimethylsilyl)aniline

| m/z (prec.) | Species | CE | Score (Lib) | Score (Fwd) | Score (Rev) | Lib/DB   |
|-------------|---------|----|-------------|-------------|-------------|----------|
|             |         |    | 42.18       |             |             | NIST17.L |

## Library Match Details

| m/z (prec.) | Species | CE | Score (Lib) | Score (Fwd) | Score (Rev) | Lib/DB   |
|-------------|---------|----|-------------|-------------|-------------|----------|
|             |         |    | 42.18       |             |             | NIST17.L |

## Observed Spectrum

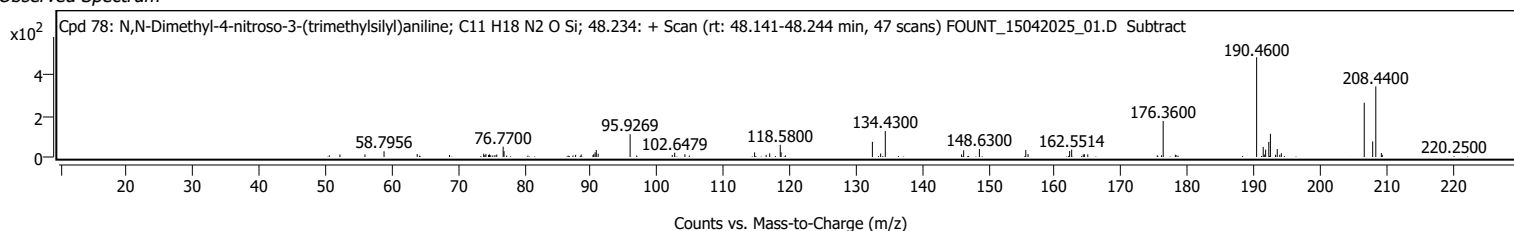

## Library Spectrum

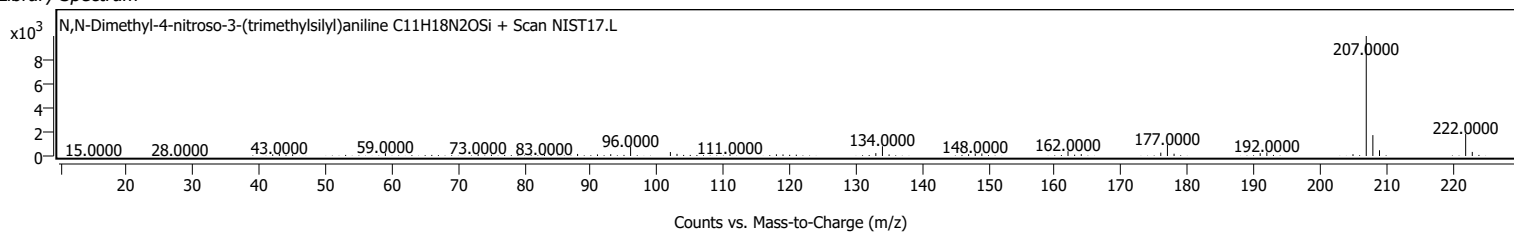

## Cpd. 79: 1-Boraindane, 3-methyl-1-[1-(trimethylsilyl)-2,4-cyclopentadien-3-yl]-

| Name                                                                   | Formula   | RT     | CAS         | ID Source | Score | Algorithm | Lib/DB   |
|------------------------------------------------------------------------|-----------|--------|-------------|-----------|-------|-----------|----------|
| 1-Boraindane, 3-methyl-1-[1-(trimethylsilyl)-2,4-cyclopentadien-3-yl]- | C17H23BSi | 48.280 | 190316-36-0 | LibSearch | 42.95 | Integrate | NIST17.L |

## Compound ID Table

| Name                                                                   | Formula     | ID Source | RT     | CAS          | Score |
|------------------------------------------------------------------------|-------------|-----------|--------|--------------|-------|
| 1-Boraindane, 3-methyl-1-[1-(trimethylsilyl)-2,4-cyclopentadien-3-yl]- | C17H23BSi   | LibSearch | 48.280 | 190316-36-0  | 42.95 |
| Caprolactone oxime, (NB)-O-[(diethylboryloxy)(ethyl)boryl]-            | C12H25B2NO2 | LibSearch | 48.280 | 1000161-37-6 | 40.05 |
| 1-Isopropoxy-5-propyl-2,3-bis-trimethylsilyl-1,2-dihydroborinine       | C17H35BOSi2 | LibSearch | 48.280 | 1000306-53-9 | 37.03 |

## Structure

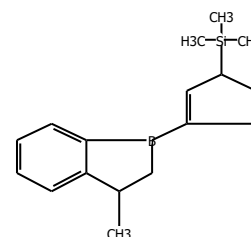

## Compound Spectra (overlaid)

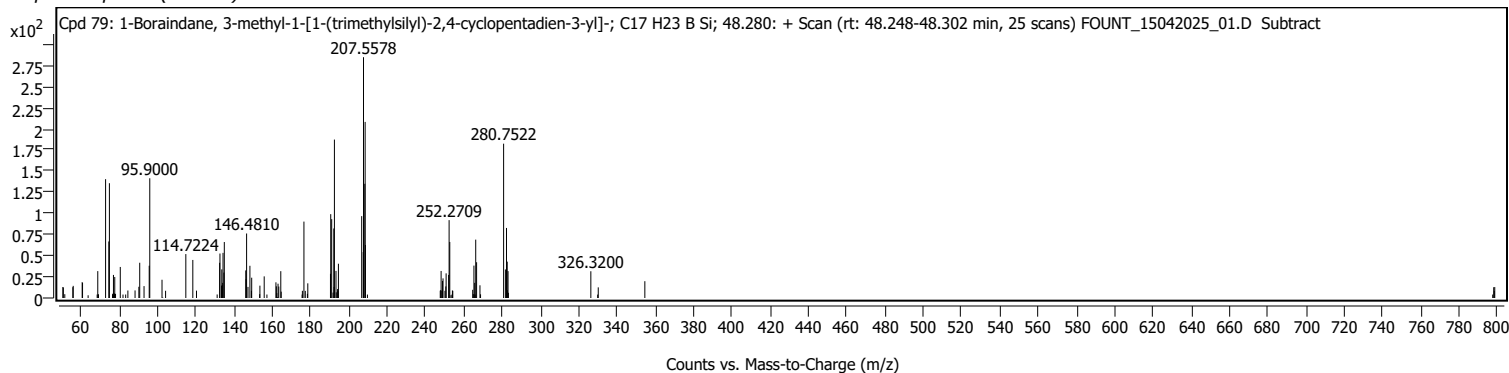

1-Boraindane, 3-methyl-1-[1-(trimethylsilyl)-2,4-cyclopentadien-3-yl]-

| m/z (prec.) | Species | CE | Score (Lib) | Score (Fwd) | Score (Rev) | Lib/DB   |
|-------------|---------|----|-------------|-------------|-------------|----------|
|             |         |    | 42.95       |             |             | NIST17.L |

## Library Match Details

| m/z (prec.) | Species | CE | Score (Lib) | Score (Fwd) | Score (Rev) | Lib/DB   |
|-------------|---------|----|-------------|-------------|-------------|----------|
|             |         |    | 42.95       |             |             | NIST17.L |

## Observed Spectrum

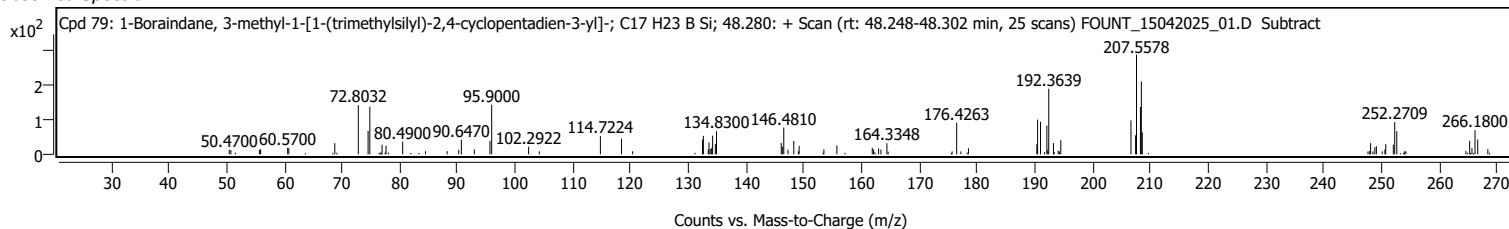

## Library Spectrum

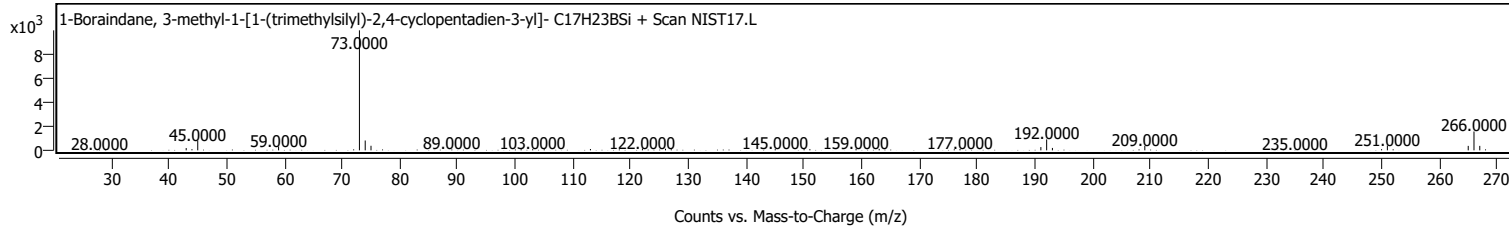

## Cpd. 80: Tris(tert-butyl)dimethylsilyloxyarsane

| Name                                   | Formula           | RT     | CAS          | ID Source | Score | Algorithm | Lib/DB   |
|----------------------------------------|-------------------|--------|--------------|-----------|-------|-----------|----------|
| Tris(tert-butyl)dimethylsilyloxyarsane | C18 H45 As O3 Si3 | 48.723 | 1000366-57-5 | LibSearch | 54.28 | Integrate | NIST17.L |

## Compound ID Table

| Name                                          | Formula       | ID Source | RT     | CAS          | Score |
|-----------------------------------------------|---------------|-----------|--------|--------------|-------|
| Tris(tert-butyl)dimethylsilyloxyarsane        | C18H45AsO3Si3 | LibSearch | 48.723 | 1000366-57-5 | 54.28 |
| 4-Pyridinol-3,5-dichloro-2,6-dimethyl-1-oxide | C7H7Cl2NO2    | LibSearch | 48.723 | 1000252-90-7 | 35.08 |
| Cyclotrisiloxane, hexamethyl-                 | C6H18O3Si3    | LibSearch | 48.723 | 541-05-9     | 33.87 |

## Structure

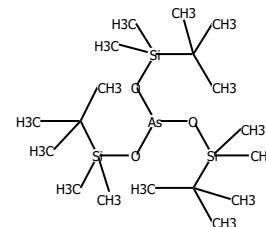

# Compound Discovery Report

## Compound Spectra (overlaid)

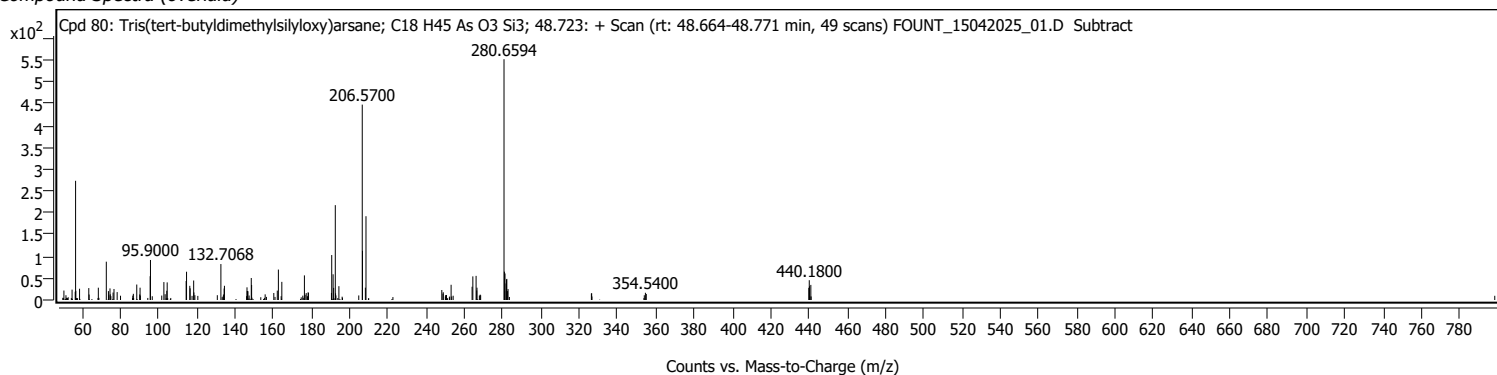

Tris(tert-butyl(dimethylsilyloxy)arsane

| m/z (prec.) | Species | CE | Score (Lib) | Score (Fwd) | Score (Rev) | Lib/DB   |
|-------------|---------|----|-------------|-------------|-------------|----------|
|             |         |    | 54.28       |             |             | NIST17.L |

## Library Match Details

| m/z (prec.) | Species | CE | Score (Lib) | Score (Fwd) | Score (Rev) | Lib/DB   |
|-------------|---------|----|-------------|-------------|-------------|----------|
|             |         |    | 54.28       |             |             | NIST17.L |

## Observed Spectrum

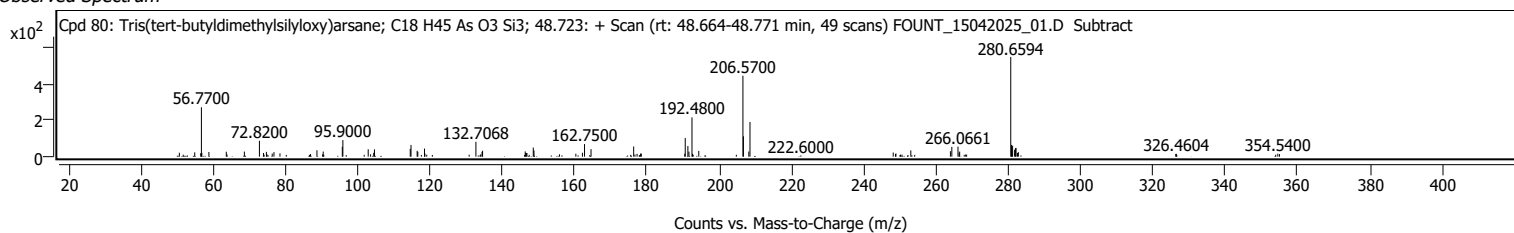

## Library Spectrum

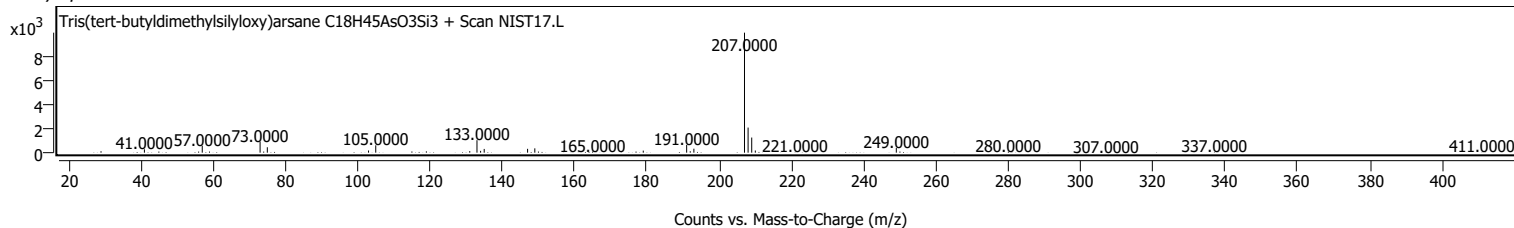

## Cpd. 81: Tris(tert-butyl(dimethylsilyloxy)arsane

| Name                                    | Formula       | RT     | CAS          | ID Source | Score | Algorithm | Lib/DB   |
|-----------------------------------------|---------------|--------|--------------|-----------|-------|-----------|----------|
| Tris(tert-butyl(dimethylsilyloxy)arsane | C18H45AsO3Si3 | 49.082 | 1000366-57-5 | LibSearch | 61.14 | Integrate | NIST17.L |

## Compound ID Table

| Name                                             | Formula       | ID Source | RT     | CAS          | Score |
|--------------------------------------------------|---------------|-----------|--------|--------------|-------|
| Tris(tert-butyl(dimethylsilyloxy)arsane          | C18H45AsO3Si3 | LibSearch | 49.082 | 1000366-57-5 | 61.14 |
| Arsenous acid, tris(trimethylsilyl) ester        | C9H27AsO3Si3  | LibSearch | 49.082 | 55429-29-3   | 60.83 |
| N,N-Dimethyl-4-nitroso-3-(trimethylsilyl)aniline | C11H18N2OSi   | LibSearch | 49.082 | 17993-84-9   | 52.01 |

## Structure

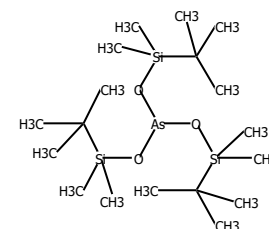

## Compound Spectra (overlaid)

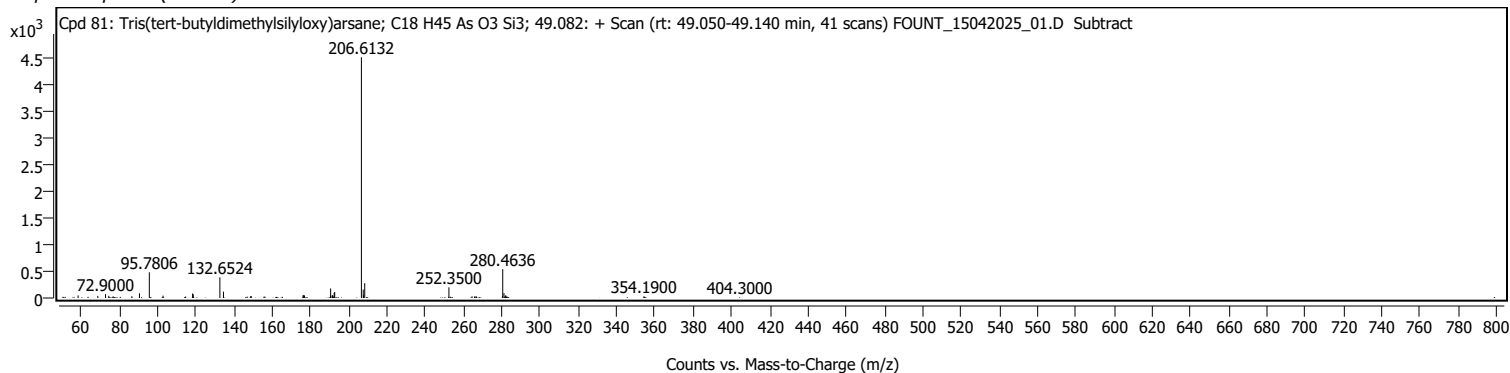

Tris(tert-butyl(dimethylsilyloxy)arsane

| m/z (prec.) | Species | CE | Score (Lib) | Score (Fwd) | Score (Rev) | Lib/DB   |
|-------------|---------|----|-------------|-------------|-------------|----------|
|             |         |    | 61.14       |             |             | NIST17.L |

## Library Match Details

| m/z (prec.) | Species | CE | Score (Lib) | Score (Fwd) | Score (Rev) | Lib/DB   |
|-------------|---------|----|-------------|-------------|-------------|----------|
|             |         |    | 61.14       |             |             | NIST17.L |

## Observed Spectrum

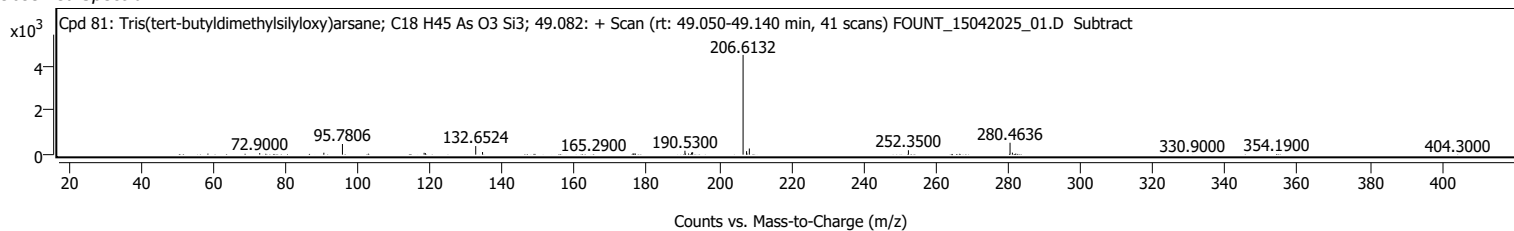

## Library Spectrum



## Cpd. 82: Tris(tert-butyl(dimethylsilyloxy)arsane

| Name                                    | Formula       | RT     | CAS          | ID Source | Score | Algorithm | Lib/DB   |
|-----------------------------------------|---------------|--------|--------------|-----------|-------|-----------|----------|
| Tris(tert-butyl(dimethylsilyloxy)arsane | C18H45AsO3Si3 | 49.560 | 1000366-57-5 | LibSearch | 56.92 | Integrate | NIST17.L |

## Compound ID Table

| Name                                             | Formula       | ID Source | RT     | CAS          | Score |
|--------------------------------------------------|---------------|-----------|--------|--------------|-------|
| Tris(tert-butyl(dimethylsilyloxy)arsane          | C18H45AsO3Si3 | LibSearch | 49.560 | 1000366-57-5 | 56.92 |
| Arsenous acid, tris(trimethylsilyl) ester        | C9H27AsO3Si3  | LibSearch | 49.560 | 55429-29-3   | 54.49 |
| N,N-Dimethyl-4-nitroso-3-(trimethylsilyl)aniline | C11H18N2OSi   | LibSearch | 49.560 | 17993-84-9   | 53.42 |

## Structure



# Compound Discovery Report

## Compound Spectra (overlaid)

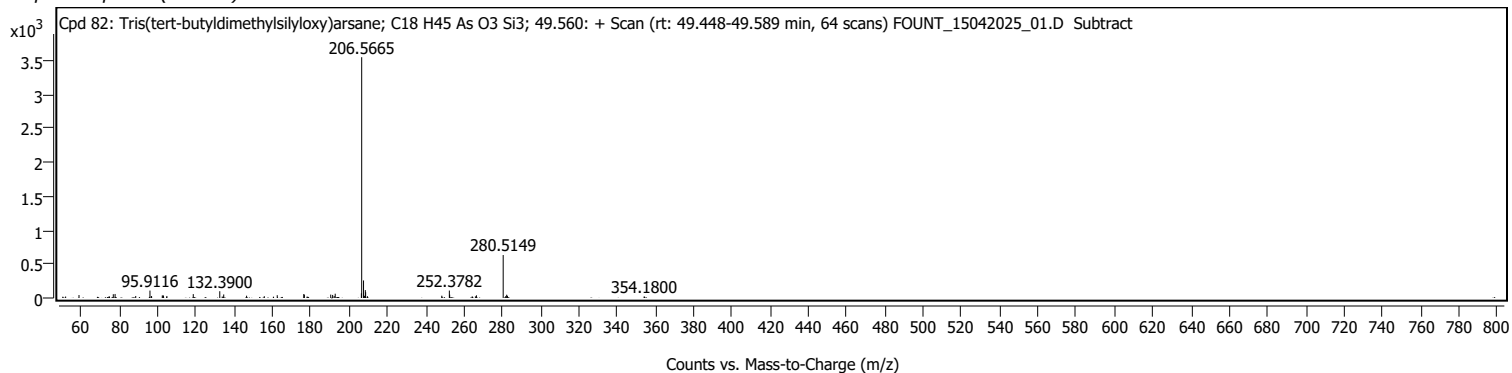

## Tris(tert-butyldimethylsilyloxy)arsane

| m/z (prec.) | Species | CE | Score (Lib) | Score (Fwd) | Score (Rev) | Lib/DB   |
|-------------|---------|----|-------------|-------------|-------------|----------|
|             |         |    | 56.92       |             |             | NIST17.L |

## Library Match Details

| m/z (prec.) | Species | CE | Score (Lib) | Score (Fwd) | Score (Rev) | Lib/DB   |
|-------------|---------|----|-------------|-------------|-------------|----------|
|             |         |    | 56.92       |             |             | NIST17.L |

## Observed Spectrum

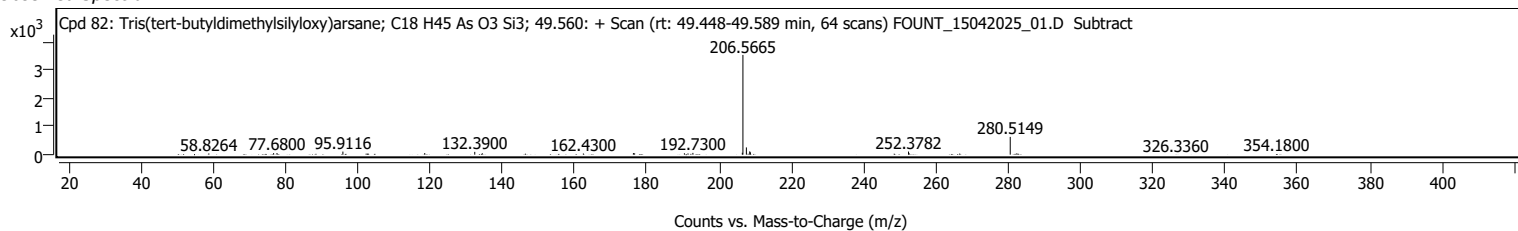

## Library Spectrum

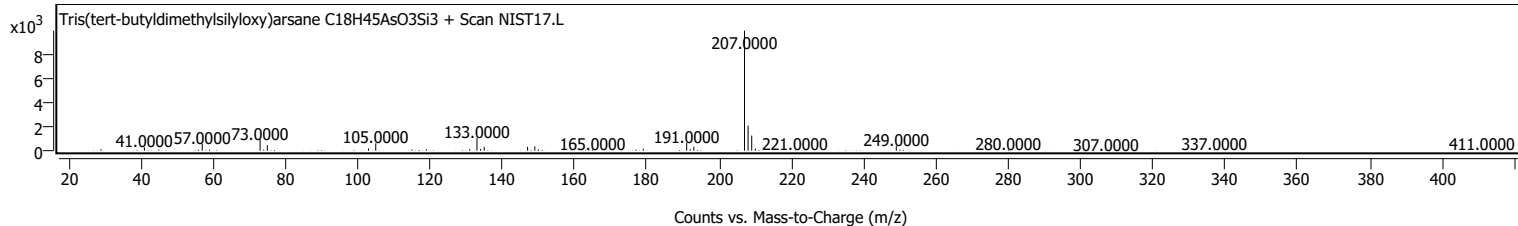

MassHunter Qual 10.0  
(End of Report)
